# Supplementary material for: Evidence for a SN2-type pathway in the exchange of phosphines at a [PhSe]+centre
Source: Royal Society of Chemistry journal article supplement (doi:10.1039/c4dt02253j), 2014-10-16
Supplement: c4dt02253j1.pdf [file c4dt02253j1.pdf]

# *Supplementary Information*

## **Evidence for a S<sub>N</sub>2-Type Pathway in the Exchange of Phosphines at a [PhSe]<sup>+</sup> Centre**

**Laura C. Forfar,<sup>a</sup> Michael Green,<sup>a</sup> Mairi F. Haddow,<sup>a</sup> Sharifa Hussein,<sup>b</sup> Jason M. Lynam,<sup>b</sup> John M. Slattery<sup>b</sup> and Christopher A. Russell<sup>a</sup>**

<sup>a</sup> *School of Chemistry, University of Bristol, Bristol, BS8 1TS, Email: Chris.Russell@bristol.ac.uk;*

*Web: <http://www.inchm.bris.ac.uk/people/russell/Index2.htm>*

<sup>b</sup> *Department of Chemistry, University of York, Heslington, York, YO10 5DD, UK, Fax: (+) 44(0)1904 432516. Email: john.slattery@york.ac.uk.*

This document contains the kinetic data for phosphine exchange at **1** and **2**, SCF energies, ZPEs, XYZ coordinates and vibrational frequencies for the stationary points reported in the main section of the publication.

## Contents

|                                                                                                                     |     |
|---------------------------------------------------------------------------------------------------------------------|-----|
| Kinetic Data.....                                                                                                   | 3   |
| Computational details .....                                                                                         | 5   |
| General Considerations.....                                                                                         | 5   |
| Table 1 – Summary of energetic data (BP86/SV(P) level) .....                                                        | 7   |
| Table 2 – Summary of energetic data (BP86/def-TZVPP level) .....                                                    | 8   |
| Table 3 – Summary of energetic data (PBE0/def2-TZVPP//BP86/SV(P) level).....                                        | 9   |
| Table 4 – Summary of energetic data (BP86-D3/SV(P) level).....                                                      | 10  |
| Table 5 – Summary of energetic data (BP86-D3/def2-TZVPP level) .....                                                | 11  |
| Table 6 – Summary of key computational data for PPh <sub>3</sub> exchange (for comparison with experiment)<br>..... | 12  |
| SCF energies, ZPEs, XYZ coordinates and vibrational frequencies.....                                                | 13  |
| BP86/SV(P) level optimisations .....                                                                                | 14  |
| BP86/def2-TZVPP level optimisations .....                                                                           | 71  |
| BP86-D3/SV(P) level optimisations.....                                                                              | 124 |
| BP86-D3/def2-TZVPP level optimisations.....                                                                         | 177 |
| References .....                                                                                                    | 230 |

## Kinetic Data

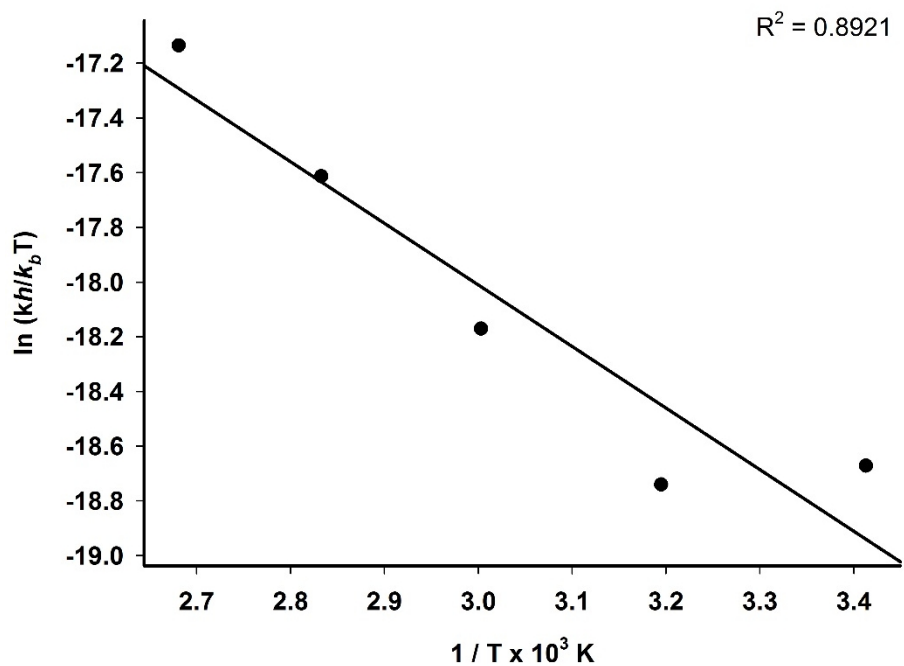

**Figure S1a** Eyring plot for exchange of  $[\text{PhSPPPh}_3]^+[\text{GaCl}_4]$  (**1**) with  $\text{PPh}_3$ . Data are derived from analysis of the coordinated  $\text{PPh}_3$  resonance.

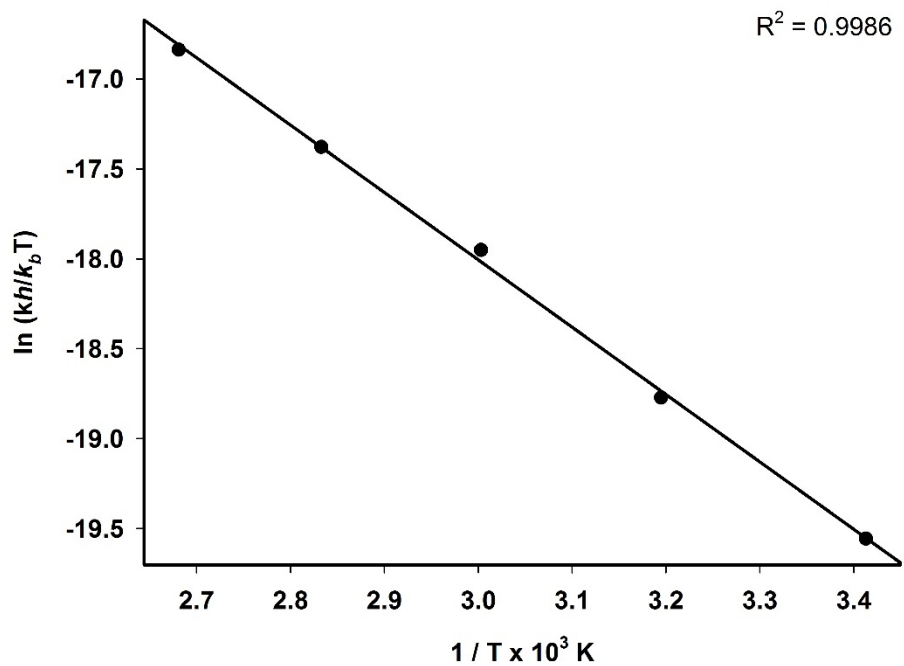

**Figure S1b** Eyring plot for exchange of  $[\text{PhSPPPh}_3]^+[\text{GaCl}_4]$  (**1**) with  $\text{PPh}_3$ . Data are derived from analysis of the free  $\text{PPh}_3$  resonance.

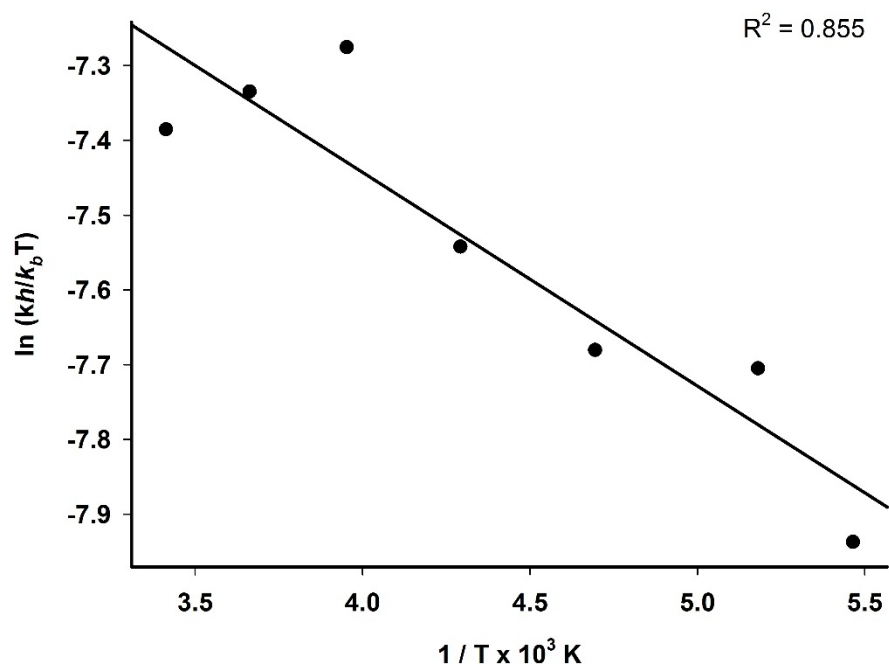

**Figure S2** Eyring plot for exchange of  $[\text{PhSePPh}_3]^+[\text{GaCl}_4]^-$  (2) with  $\text{PPh}_3$

## Computational details

### General Considerations

Optimisations were performed at the (RI-)BP86/SV(P), (RI-)BP86/def2-TZVPP, (RI-)BP86-D3/SV(P) and (RI-)BP86-D3/def2-TZVPP levels, followed by frequency calculations at the same level. Transition states were located by initially performing a constrained minimisation (by freezing internal coordinates that change most during the reaction) of a structure close to the anticipated transition state. This was followed by a frequency calculation to identify the transition vector to follow during a subsequent transition state optimisation. A final frequency calculation was then performed on the optimised transition-state structure. All minima were confirmed as such by the absence of imaginary frequencies and all transition states were identified by the presence of only one imaginary frequency. Reaction intermediates in the  $S_N2$ -like phosphine exchange mechanism for  $[\text{PhSePR}_3]^+$  ions were found to be minima on the potential energy surface at all levels of theory, rather than first-order saddle points. Zero-point energies, thermal energies and entropies were derived from frequency calculations at the level of theory used for each optimisation. Gas-phase entropies from frequency calculations were converted to standard-state concentration of  $1 \text{ mol dm}^{-3}$ . Symmetry constraints were only applied during optimisations of  $[\text{GaCl}_4]^-$ , which was constrained to tetrahedral symmetry. All calculations were performed using the TURBOMOLE V6.40 package using the resolution of identity (RI) approximation.<sup>1-9</sup> Solvation effects were modelled using the COSMO module of TURBOMOLE using the dielectric constant of dichloromethane (8.93 at 298 K).<sup>10</sup>

It was not possible to locate some transition states at certain levels of theory using the approach described above (as the potential energy surface is very flat in some cases). In these cases one S-P bond was constrained to a distance found for a transition state at a related level of theory and a constrained optimisation was performed on this structure in order to approximate the transition state. Details of these constraints and the states modelled in this way are below.

| Structure and level                                                    | Fixed S-P distance (Å)                          |
|------------------------------------------------------------------------|-------------------------------------------------|
| TS $[\text{PhS}(\text{PPh}_3)_2]^+$ BP86/TZVPP                         | 2.589 (as in BP86/SV(P) optimised structure)    |
| TS $[\text{PhS}(\text{PPh}_3)_2]^+$ BP86-D3/TZVPP                      | 2.527 (as in BP86-D3/SV(P) optimised structure) |
| TS $[\text{PhS}(\text{PPh}_3)(\text{P}^t\text{Bu}_3)]^+$ BP86/TZVPP    | 2.542 (as in BP86/SV(P) optimised structure)    |
| TS $[\text{PhS}(\text{PPh}_3)(\text{P}^t\text{Bu}_3)]^+$ BP86-D3/SV(P) | 2.542 (as in BP86/SV(P) optimised structure)    |
| TS $[\text{PhS}(\text{PPh}_3)(\text{P}^t\text{Bu}_3)]^+$ BP86-D3/TZVPP | 2.542 (as in BP86/SV(P) optimised structure)    |

Single-point calculations on the (RI-)BP86/SV(P) optimised geometries were performed using the hybrid PBE0 functional and the flexible def2-TZVPP basis set. The (RI-)PBE0/def2-TZVPP SCF energies were corrected for their zero point energies, thermal energies and entropies (obtained from the (RI-)BP86/SV(P)-level frequency calculations). Single-point DFT-D3 corrections (on the (RI-)BP86/SV(P) geometries) have been applied at the PBE0-D3 level using Grimme's DFT-D3 V3.0 Rev 2 program (with BJ-damping)<sup>11, 12</sup> and data presented below, where PBE0-D3 is indicated, includes this correction.

The effects of including counter anions explicitly in the calculations was explored for some states in the  $[\text{PhSe}(\text{PPh}_3)][\text{GaCl}_4] + \text{PPh}_3$  system (where DFT-D3 calculations were seen to disagree more markedly with experimental energy changes). When solvation effects were taken into account using

the COSMO model, this generally resulted in small changes in relative energies compared to modelling the isolated cations. This suggests that the salts in these systems are likely to be relatively ion-separated and that solvation-corrections are a reasonable approximation to the experimental system. Since there is significant potential for the introduction of errors in relative energies when including explicit anions in these types of system, e.g. if there is incomplete sampling of conformational and isomer space, explicit anion calculations were not performed on all states. The only exception to this is in the S<sub>N</sub>1-like phosphine exchange mechanism, which would proceed via a [PhE]<sup>+</sup> (E = S, Se) ion in the cation-only model. In this case inclusion of an explicit [GaCl<sub>4</sub>]<sup>-</sup> anion leads to halide abstraction by the Lewis-acidic pnictogenium ion and the formation of a GaCl<sub>3</sub> adduct of the resulting species (i.e. PhECl.GaCl<sub>3</sub>) both in the gas phase and solution. As such, an explicit anion was included when modelling the S<sub>N</sub>1-like phosphine exchange mechanism.

Single-point energy calculations on the BP86/SV(P) optimised structures were performed using Gaussian 09 (at the BP86/SVP level of theory)<sup>13</sup> to prepare input for NBO analysis by the NBO 5.9 package.<sup>14</sup>



Table 1 – Summary of energetic data (BP86/SV(P) level)

| BP86/SV(P)               |                                 |                                        |                                    |                        |                    |                       |           |                                                   |                      |                    |                   |                      |                                               |                                              |
|--------------------------|---------------------------------|----------------------------------------|------------------------------------|------------------------|--------------------|-----------------------|-----------|---------------------------------------------------|----------------------|--------------------|-------------------|----------------------|-----------------------------------------------|----------------------------------------------|
| Structure                | BP86/SV(P)<br>Opt SCF<br>(a.u.) | BP86/SV(P)<br>COSMO<br>(CH2Cl2) (a.u.) | BP86/SV(P) Vibrational Frequencies |                        |                    |                       |           |                                                   | BP86/SV(P) Gas Phase |                    |                   | BP86/SV(P) COSMO DCM |                                               |                                              |
|                          |                                 |                                        | ZPE (a.u.)                         | Chem. Pot.<br>(kJ/mol) | Energy<br>(kJ/mol) | Entropy<br>(kJ/K/mol) | In q(vib) | Entropy at<br>1 mol/dm <sup>3</sup><br>(kJ/K/mol) | Rel H<br>(kJ/mol)    | Rel S<br>(J/K/mol) | Rel G<br>(kJ/mol) | Rel H<br>(kJ/mol)    | Rel S<br>(J/K/mol) @<br>1mol dm <sup>-3</sup> | Rel G<br>(kJ/mol) @<br>1mol dm <sup>-3</sup> |
| [PhS]+                   | -629.2578512                    | -629.3280117                           | 0.0881712                          | 151.83                 | 247.06             | 0.3277                | 2.01      | 0.3010                                            | 374                  | 188                | 320               | 295                  | 162                                           | 247                                          |
| PhSCl.GaCl3_iso2         | -4395.079756                    | -4395.08858                            | 0.0944103                          | 120.92                 | 288.1              | 0.56903               | 16.51     | 0.5423                                            | -94                  | 67                 | -115              | 161                  | 67                                            | 141                                          |
| [PhS(PPh3)]+             | -1665.139043                    | -1665.187512                           | 0.3581954                          | 794.43                 | 1001.3             | 0.70216               | 23.06     | 0.6755                                            | 0                    | 0                  | 0                 | 0                    | 0                                             | 0                                            |
| [PhS(PPh3).PPh3]+        | -2700.883466                    | -2700.929785                           | 0.6248255                          | 1418.79                | 1750.62            | 1.12127               | 51.20     | 1.0946                                            | -20                  | -144               | 21                | 8                    | -117                                          | 43                                           |
| TS [PhS(PPh3)2]+         | -2700.882058                    | -2700.926259                           | 0.6242501                          | 1423.72                | 1747.99            | 1.09592               | 48.99     | 1.0692                                            | -18                  | -169               | 29                | 15                   | -142                                          | 57                                           |
| [PhS(PPh3).PtBu3]+_try4  | -2479.554563                    | -2479.597542                           | 0.7156387                          | 1667.24                | 1994.05            | 1.10444               | 47.68     | 1.0777                                            | -18                  | -138               | 21                | 6                    | -111                                          | 39                                           |
| TS [PhS(PPh3)(PtBu3)]+   | -2479.552992                    | -2479.596223                           | 0.7153819                          | 1681.89                | 1989.36            | 1.03957               | 41.51     | 1.0129                                            | -19                  | -203               | 39                | 4                    | -176                                          | 57                                           |
| [PhS(PtBu3).PPh3]+       | -2479.554078                    | -2479.602365                           | 0.7151331                          | 1663.07                | 1993.63            | 1.11704               | 48.8      | 1.0903                                            | -17                  | -125               | 18                | -7                   | -98                                           | 22                                           |
| [PhS(PtBu3)]+            | -1443.812296                    | -1443.862305                           | 0.4487512                          | 1043.31                | 1244.73            | 0.68386               | 19.51     | 0.6572                                            | -4                   | 5                  | -5                | -21                  | 5                                             | -22                                          |
| [PhSe]+                  | -2632.700198                    | -2632.768909                           | 0.0876259                          | 147.39                 | 246.11             | 0.33942               | 2.25      | 0.3127                                            | 356                  | 186                | 303               | 280                  | 159                                           | 233                                          |
| PhSeCl.GaCl3_iso2        | -6398.525782                    | -6398.53507                            | 0.0937054                          | 116.58                 | 287.1              | 0.58023               | 17.15     | 0.5535                                            | -122                 | 64                 | -141              | 132                  | 64                                            | 113                                          |
| [PhSe(PPh3)]+            | -3668.574318                    | -3668.622563                           | 0.3570935                          | 788.5                  | 999.69             | 0.71665               | 24.01     | 0.6900                                            | 0                    | 0                  | 0                 | 0                    | 0                                             | 0                                            |
| [PhSe(PPh3).PPh3]+       | -4704.326289                    | -4704.37042                            | 0.6238542                          | 1414.95                | 1749.36            | 1.12993               | 51.6      | 1.1032                                            | -39                  | -150               | 3                 | -6                   | -123                                          | 30                                           |
| TS [PhSe(PPh3)2]+        | -4704.326383                    | -4704.370538                           | 0.6239177                          | 1414.96                | 1749.48            | 1.13027               | 51.67     | 1.1036                                            | -39                  | -149               | 3                 | -7                   | -123                                          | 30                                           |
| [PhSe(PPh3).PtBu3]+_iso1 | -4482.998476                    | -4483.041200                           | 0.7146757                          | 1665.84                | 1992.84            | 1.10507               | 47.08     | 1.0784                                            | -40                  | -152               | 2                 | -17                  | -125                                          | 21                                           |
| TS [PhSe(PPh3)(PtBu3)]+  | -4482.998382                    | -4483.041318                           | 0.7148867                          | 1665.16                | 1993.29            | 1.10885               | 47.57     | 1.0822                                            | -40                  | -148               | 2                 | -16                  | -121                                          | 20                                           |
| [PhSe(PtBu3).PPh3]+      | -4482.998278                    | -4483.041349                           | 0.7146983                          | 1662.76                | 1993.04            | 1.11609               | 48.34     | 1.0894                                            | -40                  | -141               | 0                 | -17                  | -114                                          | 17                                           |
| [PhSe(PtBu3)]+           | -3447.249276                    | -3447.298889                           | 0.4477377                          | 1038.54                | 1243.18            | 0.69468               | 20.05     | 0.6680                                            | -8                   | 1                  | -9                | -25                  | 1                                             | -25                                          |
| PPh3                     | -1035.733961                    | -1035.742263                           | 0.2660713                          | 576.05                 | 741.41             | 0.56293               | 14.93     | 0.5362                                            |                      |                    |                   |                      |                                               |                                              |
| PtBu3                    | -814.4052432                    | -814.4087242                           | 0.3562707                          | 825.19                 | 983.72             | 0.54003               | 11.46     | 0.5133                                            |                      |                    |                   |                      |                                               |                                              |
| [GaCl4]-                 | -3765.640321                    | -3765.706409                           | 0.0047151                          | -73.09                 | 32.51              | 0.3625                | 4.76      | 0.3358                                            |                      |                    |                   |                      |                                               |                                              |



**Table 2 – Summary of energetic data (BP86/def-TZVPP level)**

| BP86/def2-TZVPP          |                                 |                                        |                                    |                        |                    |                                        |           |                                       |                      |                    |                   |                      |                                   |                                  |
|--------------------------|---------------------------------|----------------------------------------|------------------------------------|------------------------|--------------------|----------------------------------------|-----------|---------------------------------------|----------------------|--------------------|-------------------|----------------------|-----------------------------------|----------------------------------|
| Structure                | BP86/TZVPP<br>Opt SCF<br>(a.u.) | BP86/TZVPP<br>COSMO<br>(CH2Cl2) (a.u.) | BP86/TZVPP Vibrational Frequencies |                        |                    |                                        |           |                                       | BP86/TZVPP Gas Phase |                    |                   | BP86/TZVPP COSMO DCM |                                   |                                  |
|                          |                                 |                                        | ZPE (a.u.)                         | Chem. Pot.<br>(kJ/mol) | Energy<br>(kJ/mol) | Gas-<br>Phase<br>Entropy<br>(kJ/K/mol) | In q(vib) | Entropy at<br>1 mol/dm3<br>(kJ/K/mol) | Rel H<br>(kJ/mol)    | Rel S<br>(J/K/mol) | Rel G<br>(kJ/mol) | Rel H<br>(kJ/mol)    | Rel S<br>(J/K/mol) @<br>1mol dm-3 | Rel G<br>(kJ/mol) @<br>1mol dm-3 |
| [PhS]+                   | -629.6545305                    | -629.7248707                           | 0.088063                           | 151.38                 | 246.9              | 0.32871                                | 2.10      | 0.3020                                | 382                  | 186                | 329               | 302                  | 160                               | 254                              |
| PhSCl.GaCl3_iso2         | -4396.364299                    | -4396.373126                           | 0.094391                           | 120.23                 | 288.03             | 0.5711                                 | 16.77     | 0.5444                                | -75                  | 64                 | -94               | 179                  | 64                                | 160                              |
| [PhS(PPh3)]+             | -1666.433038                    | -1666.481798                           | 0.357836                           | 791.35                 | 1000.63            | 0.71026                                | 23.93     | 0.6836                                | 0                    | 0                  | 0                 | 0                    | 0                                 | 0                                |
| [PhS(PPh3).PPh3]+        | -2703.067607                    | -2703.11583                            | 0.624025                           | 1409.32                | 1749.04            | 1.14772                                | 54.15     | 1.1210                                | -9                   | -130               | 27                | 16                   | -104                              | 47                               |
| TS [PhS(PPh3)2]+         | -2703.064302                    | -2703.109632                           | 0.623969                           | 1420.07                | 1746.59            | 1.10346                                | 49.85     | 1.0768                                | -3                   | -175               | 47                | 29                   | -148                              | 74                               |
| [PhS(PPh3).PtBu3]+_try4  | -2481.547187                    | -2481.592036                           | 0.715361                           | 1663.56                | 1994.46            | 1.11816                                | 48.83     | 1.0915                                | -6                   | -135               | 32                | 16                   | -108                              | 48                               |
| TS [PhS(PPh3)(PtBu3)]+   | -2481.541724                    | -2481.58565                            | 0.715524                           | 1672.39                | 1992.65            | 1.08248                                | 45.53     | 1.0558                                | 7                    | -171               | 55                | 31                   | -144                              | 74                               |
| [PhS(PtBu3).PPh3]+       | -2481.546399                    | -2481.597084                           | 0.715444                           | 1657.27                | 1995.23            | 1.14184                                | 51.41     | 1.1151                                | -3                   | -111               | 28                | 4                    | -85                               | 29                               |
| [PhS(PtBu3)]+            | -1444.913414                    | -1444.963929                           | 0.449103                           | 1042.38                | 1246.38            | 0.69253                                | 20.28     | 0.6658                                | 1                    | 7                  | -1                | -15                  | 7                                 | -17                              |
| [PhSe]+                  | -2633.252337                    | -2633.321235                           | 0.087496                           | 146.88                 | 245.89             | 0.3404                                 | 2.33      | 0.3137                                | 361                  | 188                | 307               | 285                  | 162                               | 236                              |
| PhSeCl.GaCl3_iso2        | -6399.963657                    | -6399.973202                           | 0.093566                           | 115.53                 | 286.83             | 0.58286                                | 17.42     | 0.5562                                | -100                 | 66                 | -120              | 152                  | 66                                | 132                              |
| [PhSe(PPh3)]+            | -3670.022868                    | -3670.071445                           | 0.356842                           | 787.04                 | 999.19             | 0.71987                                | 24.34     | 0.6932                                | 0                    | 0                  | 0                 | 0                    | 0                                 | 0                                |
| [PhSe(PPh3).PPh3]+       | -4706.664428                    | -4706.709329                           | 0.623047                           | 1408.09                | 1747.81            | 1.14774                                | 53.53     | 1.1210                                | -27                  | -140               | 12                | 6                    | -113                              | 39                               |
| TS [PhSe(PPh3)2]+        | -4706.664431                    | -4706.709346                           | 0.62308                            | 1408.97                | 1747.86            | 1.14497                                | 53.21     | 1.1183                                | -27                  | -143               | 13                | 6                    | -116                              | 40                               |
| [PhSe(PPh3).PtBu3]+_iso1 | -4485.144100                    | -4485.187291                           | 0.714691                           | 1663.44                | 1993.88            | 1.11661                                | 48.07     | 1.0899                                | -24                  | -146               | 18                | 2                    | -120                              | 38                               |
| TS [PhSe(PPh3)(PtBu3)]+  | -4485.144104                    | -4485.187285                           | 0.714693                           | 1663.24                | 1993.89            | 1.11732                                | 48.15     | 1.0906                                | -24                  | -146               | 17                | 2                    | -119                              | 38                               |
| [PhSe(PtBu3).PPh3]+      | -4485.144092                    | -4485.187282                           | 0.714655                           | 1662.71                | 1993.83            | 1.11891                                | 48.33     | 1.0922                                | -24                  | -144               | 17                | 2                    | -117                              | 37                               |
| [PhSe(PtBu3)]+           | -3448.505481                    | -3448.555716                           | 0.448217                           | 1037.42                | 1245.17            | 0.70513                                | 21.03     | 0.6784                                | -4                   | 10                 | -7                | -20                  | 10                                | -23                              |
| PPh3                     | -1036.628078                    | -1036.636922                           | 0.265576                           | 573.59                 | 740.39             | 0.56778                                | 15.41     | 0.5411                                |                      |                    |                   |                      |                                   |                                  |
| PtBu3                    | -815.1088131                    | -815.1132352                           | 0.356844                           | 826.25                 | 985.65             | 0.54296                                | 11.66     | 0.5163                                |                      |                    |                   |                      |                                   |                                  |
| [GaCl4]-                 | -3766.532423                    | -3766.598161                           | 0.004571                           | -73.86                 | 32.35              | 0.36455                                | 4.92      | 0.3379                                |                      |                    |                   |                      |                                   |                                  |

Table 3 – Summary of energetic data (PBE0/def2-TZVPP//BP86/SV(P) level)

| Structure                             | PBE0/def2-TZVPP//BP86/SV(P) |                                     |                                  |                 |                |                                  |                            |                           |                             | PBE0-D3/def2-TZVPP//BP86/SV(P)         |                                     |                                     |                 |                |                                     |                            |                           |  |
|---------------------------------------|-----------------------------|-------------------------------------|----------------------------------|-----------------|----------------|----------------------------------|----------------------------|---------------------------|-----------------------------|----------------------------------------|-------------------------------------|-------------------------------------|-----------------|----------------|-------------------------------------|----------------------------|---------------------------|--|
|                                       | PBE0/TZVPP_SP SCF (a.u.)    |                                     | PBE0/TZVPP//BP86/SV(P) Gas Phase |                 |                | PBE0/TZVPP//BP86/SV(P) COSMO DCM |                            |                           | PBE0-D3/TZVPP_SP SCF (a.u.) |                                        |                                     | PBE0-D3/TZVPP//BP86/SV(P) Gas Phase |                 |                | PBE0-D3/TZVPP//BP86/SV(P) COSMO DCM |                            |                           |  |
|                                       | PBE0/TZVPP_SP SCF (a.u.)    | PBE0/TZVPP_SP COSMO (CH2Cl2) (a.u.) | Rel H (kJ/mol)                   | Rel S (J/K/mol) | Rel G (kJ/mol) | Rel H (kJ/mol)                   | Rel S (J/K/mol) @ 1moldm-3 | Rel G (kJ/mol) @ 1moldm-3 | PBE0-D3/TZVPP_SP SCF (a.u.) | PBE0-D3/TZVPP_SP COSMO (CH2Cl2) (a.u.) | PBE0/TZVPP DFT-D3 correction (a.u.) | Rel H (kJ/mol)                      | Rel S (J/K/mol) | Rel G (kJ/mol) | Rel H (kJ/mol)                      | Rel S (J/K/mol) @ 1moldm-3 | Rel G (kJ/mol) @ 1moldm-3 |  |
| [PhS] <sup>+</sup>                    | -629.1687228                | -629.2388026                        | 420                              | 188             | 366            | 340                              | 162                        | 292                       | -629.1803211                | -629.250401                            | -0.01159836                         | 455                                 | 188             | 401            | 374                                 | 162                        | 326                       |  |
| PhSeCl.GaCl3_iso2                     | -4394.54498                 | -4394.554942                        | -42                              | 67              | -62            | 208                              | 67                         | 188                       | -4394.569429                | -4394.579391                           | -0.02444938                         | -23                                 | 67              | -43            | 227                                 | 67                         | 207                       |  |
| [PhS(PPh3)] <sup>+</sup>              | -1664.919058                | -1664.968978                        | 0                                | 0               | 0              | 0                                | 0                          | 0                         | -1664.987991                | -1665.037911                           | -0.06893334                         | 0                                   | 0               | 0              | 0                                   | 0                          | 0                         |  |
| [PhS(PPh3).PPh3] <sup>+</sup>         | -2700.510708                | -2700.560418                        | -8                               | -144            | 32             | 19                               | -117                       | 54                        | -2700.637093                | -2700.686803                           | -0.12638516                         | -43                                 | -144            | -3             | -15                                 | -117                       | 20                        |  |
| TS [PhS(PPh3)2] <sup>+</sup>          | -2700.499725                | -2700.546769                        | 18                               | -169            | 66             | 53                               | -142                       | 95                        | -2700.626157                | -2700.673202                           | -0.12643234                         | -17                                 | -169            | 31             | 18                                  | -142                       | 60                        |  |
| [PhS(PPh3).PtBu3] <sup>+</sup> _try4  | -2479.255024                | -2479.300513                        | -3                               | -138            | 35             | 21                               | -111                       | 54                        | -2479.385268                | -2479.430757                           | -0.13024382                         | -46                                 | -138            | -7             | -21                                 | -111                       | 12                        |  |
| TS [PhS(PPh3)(PtBu3)] <sup>+</sup>    | -2479.247034                | -2479.292627                        | 13                               | -203            | 71             | 37                               | -176                       | 89                        | -2479.37886                 | -2479.424452                           | -0.13182564                         | -33                                 | -203            | 24             | -9                                  | -176                       | 43                        |  |
| [PhS(PtBu3).PPh3] <sup>+</sup>        | -2479.255866                | -2479.307109                        | -6                               | -125            | 29             | 3                                | -98                        | 33                        | -2479.384881                | -2479.436123                           | -0.12901411                         | -45                                 | -125            | -10            | -36                                 | -98                        | -6                        |  |
| [PhS(PtBu3)] <sup>+</sup>             | -1443.664047                | -1443.715121                        | 3                                | 5               | 2              | -14                              | 5                          | -16                       | -1443.735099                | -1443.786173                           | -0.07105184                         | 0                                   | 5               | -1             | -17                                 | 5                          | -18                       |  |
| [PhSe] <sup>+</sup>                   | -2632.380331                | -2632.449059                        | 398                              | 186             | 345            | 321                              | 159                        | 274                       | -2632.392284                | -2632.461012                           | -0.01195326                         | 433                                 | 186             | 380            | 356                                 | 159                        | 309                       |  |
| PhSeCl.GaCl3_iso2                     | -6397.759767                | -6397.770324                        | -72                              | 64              | -91            | 176                              | 64                         | 157                       | -6397.784858                | -6397.795415                           | -0.02509095                         | -53                                 | 64              | -72            | 195                                 | 64                         | 176                       |  |
| [PhSe(PPh3)] <sup>+</sup>             | -3668.12209                 | -3668.171862                        | 0                                | 0               | 0              | 0                                | 0                          | 0                         | -3668.191602                | -3668.241374                           | -0.06951228                         | 0                                   | 0               | 0              | 0                                   | 0                          | 0                         |  |
| [PhSe(PPh3).PPh3] <sup>+</sup>        | -4703.719884                | -4703.767005                        | -24                              | -150            | 18             | 10                               | -123                       | 47                        | -4703.847836                | -4703.894957                           | -0.12795223                         | -62                                 | -150            | -19            | -27                                 | -123                       | 9                         |  |
| TS [PhSe(PPh3)2] <sup>+</sup>         | -4703.720204                | -4703.76732                         | -25                              | -149            | 17             | 9                                | -123                       | 46                        | -4703.848327                | -4703.895444                           | -0.1281232                          | -63                                 | -149            | -21            | -29                                 | -123                       | 8                         |  |
| [PhSe(PPh3).PtBu3] <sup>+</sup> _iso1 | -4482.464474                | -4482.50954                         | -20                              | -152            | 23             | 5                                | -125                       | 43                        | -4482.596117                | -4482.641183                           | -0.1316432                          | -64                                 | -152            | -21            | -39                                 | -125                       | -2                        |  |
| TS [PhSe(PPh3)(PtBu3)] <sup>+</sup>   | -4482.464473                | -4482.50981                         | -19                              | -148            | 22             | 5                                | -121                       | 41                        | -4482.595974                | -4482.641311                           | -0.13150114                         | -63                                 | -148            | -22            | -39                                 | -121                       | -3                        |  |
| [PhSe(PtBu3).PPh3] <sup>+</sup>       | -4482.464385                | -4482.50991                         | -19                              | -141            | 20             | 5                                | -114                       | 38                        | -4482.59583                 | -4482.641355                           | -0.13144527                         | -63                                 | -141            | -24            | -39                                 | -114                       | -5                        |  |
| [PhSe(PtBu3)] <sup>+</sup>            | -3446.869744                | -3446.920496                        | -4                               | 1               | -4             | -21                              | 1                          | -21                       | -3446.941695                | -3446.992447                           | -0.07195057                         | -7                                  | 1               | -8             | -24                                 | 1                          | -25                       |  |
| PPh3                                  | -1035.585414                | -1035.595794                        |                                  |                 |                |                                  |                            |                           | -1035.629631                | -1035.64001                            | -0.04421661                         |                                     |                 |                |                                     |                            |                           |  |
| PtBu3                                 | -814.3312085                | -814.3360985                        |                                  |                 |                |                                  |                            |                           | -814.376468                 | -814.381358                            | -0.04525954                         |                                     |                 |                |                                     |                            |                           |  |
| [GaCl4] <sup>-</sup>                  | -3765.197072                | -3765.262728                        |                                  |                 |                |                                  |                            |                           | -3765.204054                | -3765.26971                            | -0.00698146                         |                                     |                 |                |                                     |                            |                           |  |

Table 4 – Summary of energetic data (BP86-D3/SV(P) level)

| BP86-D3/SV(P)                                                   |                                 |                                                                  |                                    |                        |                    |                       |           |                                                   |                      |                    |                   |                      |                                              |                                             |
|-----------------------------------------------------------------|---------------------------------|------------------------------------------------------------------|------------------------------------|------------------------|--------------------|-----------------------|-----------|---------------------------------------------------|----------------------|--------------------|-------------------|----------------------|----------------------------------------------|---------------------------------------------|
| Structure                                                       | BP86/SV(P)<br>Opt SCF<br>(a.u.) | BP86/SV(P)<br>COSMO<br>(CH <sub>2</sub> Cl <sub>2</sub> ) (a.u.) | BP86/SV(P) Vibrational Frequencies |                        |                    |                       |           |                                                   | BP86/SV(P) Gas Phase |                    |                   | BP86/SV(P) COSMO DCM |                                              |                                             |
|                                                                 |                                 |                                                                  | ZPE (a.u.)                         | Chem. Pot.<br>(kJ/mol) | Energy<br>(kJ/mol) | Entropy<br>(kJ/K/mol) | In q(vib) | Entropy at<br>1 mol/dm <sup>3</sup><br>(kJ/K/mol) | Rel H<br>(kJ/mol)    | Rel S<br>(J/K/mol) | Rel G<br>(kJ/mol) | Rel H<br>(kJ/mol)    | Rel S<br>(J/K/mol) @<br>1moldm <sup>-3</sup> | Rel G<br>(kJ/mol) @<br>1moldm <sup>-3</sup> |
| [PhS] <sup>+</sup>                                              | -629.2658134                    | -629.3359743                                                     | 0.0881591                          | 151.8                  | 247.03             | 0.32772               | 2.01      | 0.3010                                            | 426                  | 193                | 371               | 348                  | 166                                          | 298                                         |
| PhS <sub>2</sub> Cl.GaCl <sub>3</sub> _iso2                     | -4395.103225                    | -4395.111992                                                     | 0.0945176                          | 121.37                 | 288.23             | 0.56797               | 16.48     | 0.5413                                            | -66                  | 71                 | -87               | 191                  | 71                                           | 170                                         |
| [PhS(PPh <sub>3</sub> )] <sup>+</sup>                           | -1665.202624                    | -1665.251359                                                     | 0.3585327                          | 798.64                 | 1001.63            | 0.68915               | 21.77     | 0.6625                                            | 0                    | 0                  | 0                 | 0                    | 0                                            | 0                                           |
| [PhS(PPh <sub>3</sub> ).PPh <sub>3</sub> ] <sup>+</sup>         | -2701.003836                    | -2701.048585                                                     | 0.6254154                          | 1428.62                | 1751.27            | 1.09049               | 47.94     | 1.0638                                            | -75                  | -153               | -31               | -43                  | -126                                         | -5                                          |
| TS [PhS(PPh <sub>3</sub> ) <sub>2</sub> ] <sup>+</sup>          | -2701.003813                    | -2701.048309                                                     | 0.6253348                          | 1434.06                | 1748.75            | 1.0638                | 45.66     | 1.0371                                            | -77                  | -180               | -26               | -44                  | -153                                         | 1                                           |
| [PhS(PPh <sub>3</sub> ).PtBu <sub>3</sub> ] <sup>+</sup>        | -2479.7000                      | -2479.742682                                                     | 0.7167281                          | 1681.27                | 1995.81            | 1.0633                | 43.25     | 1.0366                                            | -87                  | -163               | -41               | -62                  | -137                                         | -21                                         |
| TS [PhS(PPh <sub>3</sub> )(PtBu <sub>3</sub> )] <sup>+</sup>    | -2479.699756                    | -2479.742682                                                     | 0.7166162                          | 1679.79                | 1995.84            | 1.06836               | 43.74     | 1.0417                                            | -86                  | -158               | -42               | -62                  | -131                                         | -23                                         |
| [PhS(PtBu <sub>3</sub> ).PPh <sub>3</sub> ] <sup>+</sup>        | -2479.700724                    | -2479.747923                                                     | 0.7168914                          | 1681.15                | 1996.32            | 1.06541               | 43.48     | 1.0387                                            | -88                  | -161               | -43               | -75                  | -134                                         | -35                                         |
| [PhS(PtBu <sub>3</sub> )] <sup>+</sup>                          | -1443.897514                    | -1443.947662                                                     | 0.4494198                          | 1046.08                | 1246.01            | 0.67887               | 19.13     | 0.6522                                            | -9                   | 7                  | -11               | -25                  | 7                                            | -27                                         |
| [PhSe] <sup>+</sup>                                             | -2632.708555                    | -2632.777263                                                     | 0.0876113                          | 147.35                 | 246.08             | 0.33945               | 2.25      | 0.3128                                            | 410                  | 193                | 355               | 336                  | 166                                          | 286                                         |
| PhSeCl.GaCl <sub>3</sub> _iso2                                  | -6398.550283                    | -6398.559447                                                     | 0.0937974                          | 117.57                 | 287.18             | 0.57719               | 16.88     | 0.5505                                            | -93                  | 68                 | -114              | 162                  | 68                                           | 142                                         |
| [PhSe(PPh <sub>3</sub> )] <sup>+</sup>                          | -3668.639266                    | -3668.687866                                                     | 0.3575188                          | 793.64                 | 1000.16            | 0.701                 | 22.44     | 0.6743                                            | 0                    | 0                  | 0                 | 0                    | 0                                            | 0                                           |
| [PhSe(PPh <sub>3</sub> ).PPh <sub>3</sub> ] <sup>+</sup>        | -4704.449277                    | -4704.493568                                                     | 0.6246469                          | 1425.06                | 1750.1             | 1.0985                | 48.41     | 1.0718                                            | -97                  | -157               | -53               | -65                  | -130                                         | -26                                         |
| TS [PhSe(PPh <sub>3</sub> ) <sub>2</sub> ] <sup>+</sup>         | -4704.449284                    | -4704.493575                                                     | 0.6246426                          | 1425.03                | 1750.09            | 1.0986                | 48.42     | 1.0719                                            | -97                  | -157               | -53               | -65                  | -130                                         | -26                                         |
| [PhSe(PPh <sub>3</sub> ).PtBu <sub>3</sub> ] <sup>+</sup> _iso1 | -4483.144958                    | -4483.187911                                                     | 0.7159353                          | 1676.99                | 1994.67            | 1.07382               | 43.97     | 1.0471                                            | -109                 | -165               | -62               | -84                  | -138                                         | -43                                         |
| TS [PhSe(PPh <sub>3</sub> )(PtBu <sub>3</sub> )] <sup>+</sup>   | -4483.144906                    | -4483.187908                                                     | 0.7161509                          | 1677.11                | 1995.11            | 1.07491               | 44.14     | 1.0482                                            | -108                 | -163               | -62               | -84                  | -137                                         | -43                                         |
| [PhSe(PtBu <sub>3</sub> ).PPh <sub>3</sub> ] <sup>+</sup>       | -4483.14487                     | -4483.187825                                                     | 0.7158782                          | 1676.02                | 1994.7             | 1.07716               | 44.29     | 1.0505                                            | -108                 | -161               | -63               | -84                  | -135                                         | -44                                         |
| [PhSe(PtBu <sub>3</sub> )] <sup>+</sup>                         | -3447.336202                    | -3447.385962                                                     | 0.4484289                          | 1042.13                | 1244.4             | 0.68672               | 19.36     | 0.6600                                            | -15                  | 3                  | -16               | -30                  | 3                                            | -31                                         |
| PPh <sub>3</sub>                                                | -1035.769804                    | -1035.777984                                                     | 0.2662863                          | 578.91                 | 741.69             | 0.55429               | 14.03     | 0.5276                                            |                      |                    |                   |                      |                                              |                                             |
| PtBu <sub>3</sub>                                               | -814.4604618                    | -814.4639838                                                     | 0.3566093                          | 826.6                  | 984.33             | 0.53736               | 11.26     | 0.5107                                            |                      |                    |                   |                      |                                              |                                             |
| [GaCl <sub>4</sub> ] <sup>-</sup>                               | -3765.646767                    | -3765.712872                                                     | 0.0047297                          | -73.01                 | 32.53              | 0.3623                | 4.74      | 0.3356                                            |                      |                    |                   |                      |                                              |                                             |

Table 5 – Summary of energetic data (BP86-D3/def2-TZVPP level)

| BP86-D3/def2-TZVPP       |                                 |                                        |                                    |                        |                    |                       |           |                                       |                      |                    |                   |                      |                                  |                                 |
|--------------------------|---------------------------------|----------------------------------------|------------------------------------|------------------------|--------------------|-----------------------|-----------|---------------------------------------|----------------------|--------------------|-------------------|----------------------|----------------------------------|---------------------------------|
| Structure                | BP86/TZVPP<br>Opt SCF<br>(a.u.) | BP86/TZVPP<br>COSMO<br>(CH2Cl2) (a.u.) | BP86/TZVPP Vibrational Frequencies |                        |                    |                       |           |                                       | BP86/TZVPP Gas Phase |                    |                   | BP86/TZVPP COSMO DCM |                                  |                                 |
|                          |                                 |                                        | ZPE (a.u.)                         | Chem. Pot.<br>(kJ/mol) | Energy<br>(kJ/mol) | Entropy<br>(kJ/K/mol) | In q(vib) | Entropy at<br>1 mol/dm3<br>(kJ/K/mol) | Rel H<br>(kJ/mol)    | Rel S<br>(J/K/mol) | Rel G<br>(kJ/mol) | Rel H<br>(kJ/mol)    | Rel S<br>(J/K/mol) @<br>1moldm-3 | Rel G<br>(kJ/mol) @<br>1moldm-3 |
| [PhS]+                   | -629.662471                     | -629.7328138                           | 0.08805                            | 151.34                 | 246.87             | 0.32874               | 2.10      | 0.3020                                | 433                  | 191                | 379               | 354                  | 165                              | 305                             |
| PhSCl.GaCl3_iso2         | -4396.390311                    | -4396.398586                           | 0.094662                           | 127.41                 | 288.15             | 0.54742               | 14.43     | 0.5207                                | -54                  | 46                 | -65               | 203                  | 46                               | 189                             |
| [PhS(PPh3)]+             | -1666.496612                    | -1666.545581                           | 0.358172                           | 795.94                 | 1000.99            | 0.69606               | 22.49     | 0.6694                                | 0                    | 0                  | 0                 | 0                    | 0                                | 0                               |
| [PhS(PPh3).PPh3]+        | -2703.187137                    | -2703.232997                           | 0.625043                           | 1427.48                | 1750.33            | 1.09116               | 48.02     | 1.0645                                | -61                  | -164               | -15               | -30                  | -137                             | 11                              |
| TS [PhS(PPh3)2]+         | -2703.186981                    | -2703.232375                           | 0.624386                           | 1425.62                | 1747.01            | 1.08627               | 48.08     | 1.0596                                | -64                  | -169               | -16               | -32                  | -142                             | 11                              |
| [PhS(PPh3).PtBu3]+       | -2481.691102                    | -2481.734823                           | 0.717046                           | 1678.56                | 1997.01            | 1.07641               | 44.69     | 1.0497                                | -69                  | -160               | -24               | -44                  | -133                             | -4                              |
| TS [PhS(PPh3)(PtBu3)]+   | -2481.690400                    | -2481.734168                           | 0.716868                           | 1682.58                | 1994.74            | 1.0553                | 42.90     | 1.0286                                | -70                  | -181               | -18               | -45                  | -154                             | 1                               |
| [PhS(PtBu3).PPh3]+       | -2481.691953                    | -2481.740415                           | 0.717167                           | 1681.61                | 1997.51            | 1.06784               | 43.6      | 1.0411                                | -71                  | -169               | -23               | -58                  | -142                             | -16                             |
| [PhS(PtBu3)]+            | -1444.999251                    | -1445.049865                           | 0.449604                           | 1043.99                | 1247.44            | 0.69066               | 20.19     | 0.6640                                | -5                   | 13                 | -9                | -21                  | 13                               | -24                             |
| [PhSe]+                  | -2633.260673                    | -2633.329569                           | 0.087483                           | 146.83                 | 245.86             | 0.34047               | 2.33      | 0.3138                                | 415                  | 189                | 361               | 340                  | 162                              | 291                             |
| PhSeCl.GaCl3_iso2        | -6399.99054                     | -6399.999592                           | 0.093835                           | 122.48                 | 286.95             | 0.55997               | 15.09     | 0.5333                                | -78                  | 44                 | -89               | 177                  | 44                               | 164                             |
| [PhSe(PPh3)]+            | -3670.087614                    | -3670.136507                           | 0.357083                           | 790.16                 | 999.43             | 0.7102                | 23.39     | 0.6835                                | 0                    | 0                  | 0                 | 0                    | 0                                | 0                               |
| [PhSe(PPh3).PPh3]+       | -4706.787428                    | -4706.832468                           | 0.623718                           | 1417.06                | 1748.44            | 1.11976               | 50.67     | 1.0931                                | -86                  | -149               | -44               | -53                  | -123                             | -16                             |
| TS [PhSe(PPh3)2]+        | -4706.78744                     | -4706.832452                           | 0.623769                           | 1417.98                | 1748.52            | 1.11698               | 50.35     | 1.0903                                | -86                  | -152               | -43               | -53                  | -125                             | -15                             |
| [PhSe(PPh3).PtBu3]+_iso1 | -4485.291076                    | -4485.335035                           | 0.716029                           | 1674.97                | 1995.94            | 1.08484               | 44.89     | 1.0581                                | -92                  | -166               | -46               | -68                  | -139                             | -26                             |
| TS [PhSe(PPh3)(PtBu3)]+  | -4485.291093                    | -4485.335072                           | 0.716125                           | 1675.68                | 1996.12            | 1.08308               | 44.71     | 1.0564                                | -92                  | -168               | -45               | -68                  | -141                             | -26                             |
| [PhSe(PtBu3).PPh3]+      | -4485.291079                    | -4485.335073                           | 0.716031                           | 1674.77                | 1995.98            | 1.08565               | 44.97     | 1.0590                                | -92                  | -165               | -46               | -68                  | -138                             | -27                             |
| [PhSe(PtBu3)]+           | -3448.592873                    | -3448.643253                           | 0.448762                           | 1041.12                | 1246.08            | 0.69574               | 20.13     | 0.6690                                | -12                  | 4                  | -13               | -27                  | 4                                | -28                             |
| PPh3                     | -1036.663971                    | -1036.672685                           | 0.265828                           | 576.65                 | 740.77             | 0.55878               | 14.47     | 0.5321                                |                      |                    |                   |                      |                                  |                                 |
| PtBu3                    | -815.164336                     | -815.1687591                           | 0.357168                           | 827.61                 | 986.26             | 0.54042               | 11.46     | 0.5137                                |                      |                    |                   |                      |                                  |                                 |
| [GaCl4]-                 | -3766.538884                    | -3766.604637                           | 0.004585                           | -73.78                 | 32.36              | 0.36433               | 4.9       | 0.3376                                |                      |                    |                   |                      |                                  |                                 |

**Table 6 – Summary of key computational data for PPh<sub>3</sub> exchange (for comparison with experiment)**

| Summary for [PhSPPh <sub>3</sub> ] <sup>+</sup> + PPh <sub>3</sub>                   |                                                        |                                                        |                                                                        |                                                           |                                                           |                                                                           |
|--------------------------------------------------------------------------------------|--------------------------------------------------------|--------------------------------------------------------|------------------------------------------------------------------------|-----------------------------------------------------------|-----------------------------------------------------------|---------------------------------------------------------------------------|
|                                                                                      | BP86/SV(P)<br>COSMO (CH <sub>2</sub> Cl <sub>2</sub> ) | BP86/TZVPP<br>COSMO (CH <sub>2</sub> Cl <sub>2</sub> ) | PBE0/TZVPP//BP86/<br>SV(P) COSMO<br>(CH <sub>2</sub> Cl <sub>2</sub> ) | BP86-D3/SV(P)<br>COSMO (CH <sub>2</sub> Cl <sub>2</sub> ) | BP86-D3/TZVPP<br>COSMO (CH <sub>2</sub> Cl <sub>2</sub> ) | PBE0-<br>D3/TZVPP//BP86/SV(P)<br>COSMO (CH <sub>2</sub> Cl <sub>2</sub> ) |
| $\Delta H$ Encounter complex (kJ mol <sup>-1</sup> )                                 | 8                                                      | 16                                                     | 19                                                                     | -43                                                       | -30                                                       | -15                                                                       |
| $\Delta H^\ddagger$ (kJ mol <sup>-1</sup> )                                          | 15                                                     | 29                                                     | 53                                                                     | -44                                                       | -32                                                       | 18                                                                        |
| $\Delta S^\ddagger$ (J mol <sup>-1</sup> K <sup>-1</sup> at 1 mol dm <sup>-3</sup> ) | -142                                                   | -148                                                   | -142                                                                   | -153                                                      | -142                                                      | -142                                                                      |
| $\Delta G^\ddagger$ (298.15 K, 1 mol dm <sup>-3</sup> ) (kJ mol <sup>-1</sup> )      | 57                                                     | 74                                                     | 95                                                                     | 1                                                         | 11                                                        | 60                                                                        |
| Summary for [PhSePPh <sub>3</sub> ] <sup>+</sup> + PPh <sub>3</sub>                  |                                                        |                                                        |                                                                        |                                                           |                                                           |                                                                           |
|                                                                                      | BP86/SV(P)<br>COSMO (CH <sub>2</sub> Cl <sub>2</sub> ) | BP86/TZVPP<br>COSMO (CH <sub>2</sub> Cl <sub>2</sub> ) | PBE0/TZVPP//BP86/<br>SV(P) COSMO<br>(CH <sub>2</sub> Cl <sub>2</sub> ) | BP86-D3/SV(P)<br>COSMO (CH <sub>2</sub> Cl <sub>2</sub> ) | BP86-D3/TZVPP<br>COSMO (CH <sub>2</sub> Cl <sub>2</sub> ) | PBE0-<br>D3/TZVPP//BP86/SV(P)<br>COSMO (CH <sub>2</sub> Cl <sub>2</sub> ) |
| $\Delta H$ Encounter complex (kJ mol <sup>-1</sup> )                                 | -6                                                     | 6                                                      | 10                                                                     | -65                                                       | -53                                                       | -27                                                                       |
| $\Delta H^\ddagger$ (kJ mol <sup>-1</sup> )                                          | -7                                                     | 6                                                      | 9                                                                      | -65                                                       | -53                                                       | -29                                                                       |
| $\Delta S^\ddagger$ (J mol <sup>-1</sup> K <sup>-1</sup> at 1 mol dm <sup>-3</sup> ) | -123                                                   | -116                                                   | -123                                                                   | -130                                                      | -125                                                      | -123                                                                      |
| $\Delta G^\ddagger$ (298.15 K, 1 mol dm <sup>-3</sup> ) (kJ mol <sup>-1</sup> )      | 30                                                     | 40                                                     | 46                                                                     | -26                                                       | -15                                                       | 8                                                                         |

| Experimental data                                          |              |
|------------------------------------------------------------|--------------|
| <b>[PhSPPh<sub>3</sub>]<sup>+</sup> + PPh<sub>3</sub></b>  |              |
| $\Delta H^\ddagger$ (kJ mol <sup>-1</sup> )                | 18.7 ± 12.0  |
| $\Delta S^\ddagger$ (J mol <sup>-1</sup> K <sup>-1</sup> ) | -93.6 ± 36.3 |
| $\Delta G^\ddagger$ (298.15 K) (kJ mol <sup>-1</sup> )     | 46           |
| <b>[PhSePPh<sub>3</sub>]<sup>+</sup> + PPh<sub>3</sub></b> |              |
| $\Delta H^\ddagger$ (kJ mol <sup>-1</sup> )                | 2.4 ± 1.1    |

|                                                            |             |
|------------------------------------------------------------|-------------|
| $\Delta S^\ddagger$ (J mol <sup>-1</sup> K <sup>-1</sup> ) | -52.4 ± 5.0 |
| $\Delta G^\ddagger$ (298.15 K) (kJ mol <sup>-1</sup> )     | 18          |

**SCF energies, ZPEs, XYZ coordinates and vibrational frequencies**

## BP86/SV(P) level optimisations

### PPh<sub>3</sub>

bp86 energy (au): -1035.7339608900

pbe0\_def2-tzvpp\_sp energy (au): -1035.585414363

Zero point energy (au): 0.2660713

Entropy (kJ mol<sup>-1</sup>): 0.56293

Chemical potential (kJ mol<sup>-1</sup>): 576.05

XYZ coordinates:

34

|   |          |          |          |
|---|----------|----------|----------|
| P | 0.00171  | -1.19430 | -0.00336 |
| C | 1.19684  | -0.37974 | 1.16401  |
| C | -0.11867 | -0.98179 | -2.79066 |
| H | -0.75298 | -1.88097 | -2.70011 |
| C | 1.24473  | 0.74968  | -1.76255 |
| H | 1.67481  | 1.22641  | -0.86652 |
| C | 0.41181  | -0.38225 | -1.62426 |
| C | 3.42198  | -0.45921 | 2.18712  |
| H | 4.40494  | -0.94938 | 2.28773  |
| C | 1.53243  | 1.27278  | -3.03577 |
| H | 2.18742  | 2.15560  | -3.12755 |
| C | 0.90735  | 0.77111  | 1.92963  |
| H | -0.07633 | 1.25976  | 1.83485  |
| C | 0.98790  | 0.67790  | -4.18662 |
| H | 1.21565  | 1.08932  | -5.18411 |
| C | 2.46263  | -0.99339 | 1.31201  |
| H | 2.69505  | -1.90612 | 0.73573  |
| C | 1.86385  | 1.29784  | 2.81554  |
| H | 1.62215  | 2.19573  | 3.40913  |
| C | 3.12315  | 0.68739  | 2.94465  |
| H | 3.87131  | 1.10162  | 3.64096  |
| C | 0.15765  | -0.45038 | -4.06057 |
| H | -0.26772 | -0.92840 | -4.95901 |
| C | -2.18273 | 0.70196  | -0.23984 |
| H | -1.65372 | 1.14604  | -1.09884 |
| C | -1.60750 | -0.38475 | 0.45439  |
| C | -2.31300 | -0.94273 | 1.54660  |
| H | -1.88644 | -1.80668 | 2.08579  |
| C | -3.42895 | 1.22158  | 0.15449  |
| H | -3.86682 | 2.06886  | -0.39976 |
| C | -4.11358 | 0.66916  | 1.25021  |
| H | -5.09042 | 1.07816  | 1.55780  |
| C | -3.54981 | -0.41418 | 1.94848  |
| H | -4.08282 | -0.85903 | 2.80551  |



Vibrational Spectrum (first 50 lines):

| #  | mode | symmetry | wave number<br>cm**(-1) | IR intensity<br>km/mol | IR  | RAMAN | selection rules |
|----|------|----------|-------------------------|------------------------|-----|-------|-----------------|
| 1  |      |          | 0.00                    | 0.00000                | -   | -     |                 |
| 2  |      |          | 0.00                    | 0.00000                | -   | -     |                 |
| 3  |      |          | 0.00                    | 0.00000                | -   | -     |                 |
| 4  |      |          | 0.00                    | 0.00000                | -   | -     |                 |
| 5  |      |          | 0.00                    | 0.00000                | -   | -     |                 |
| 6  |      |          | 0.00                    | 0.00000                | -   | -     |                 |
| 7  | a    |          | 23.76                   | 0.33541                | YES | YES   |                 |
| 8  | a    |          | 26.73                   | 0.33130                | YES | YES   |                 |
| 9  | a    |          | 41.23                   | 0.00375                | YES | YES   |                 |
| 10 | a    |          | 51.33                   | 0.10158                | YES | YES   |                 |
| 11 | a    |          | 52.07                   | 0.09240                | YES | YES   |                 |
| 12 | a    |          | 65.84                   | 0.39812                | YES | YES   |                 |
| 13 | a    |          | 177.83                  | 0.37032                | YES | YES   |                 |
| 14 | a    |          | 193.30                  | 1.24981                | YES | YES   |                 |
| 15 | a    |          | 196.02                  | 1.26312                | YES | YES   |                 |
| 16 | a    |          | 237.81                  | 0.57497                | YES | YES   |                 |
| 17 | a    |          | 252.20                  | 0.30586                | YES | YES   |                 |
| 18 | a    |          | 254.76                  | 0.32301                | YES | YES   |                 |
| 19 | a    |          | 394.44                  | 0.35406                | YES | YES   |                 |
| 20 | a    |          | 394.95                  | 1.31325                | YES | YES   |                 |
| 21 | a    |          | 396.10                  | 1.42281                | YES | YES   |                 |
| 22 | a    |          | 401.52                  | 0.10566                | YES | YES   |                 |
| 23 | a    |          | 418.79                  | 5.79853                | YES | YES   |                 |
| 24 | a    |          | 420.61                  | 6.47973                | YES | YES   |                 |
| 25 | a    |          | 495.02                  | 25.69092               | YES | YES   |                 |
| 26 | a    |          | 497.58                  | 26.50054               | YES | YES   |                 |
| 27 | a    |          | 504.28                  | 12.89446               | YES | YES   |                 |
| 28 | a    |          | 610.35                  | 0.25013                | YES | YES   |                 |
| 29 | a    |          | 610.52                  | 0.22123                | YES | YES   |                 |
| 30 | a    |          | 610.76                  | 0.07554                | YES | YES   |                 |
| 31 | a    |          | 670.23                  | 0.53694                | YES | YES   |                 |
| 32 | a    |          | 684.84                  | 1.33674                | YES | YES   |                 |
| 33 | a    |          | 685.19                  | 1.50753                | YES | YES   |                 |
| 34 | a    |          | 699.04                  | 35.19071               | YES | YES   |                 |
| 35 | a    |          | 699.28                  | 33.95861               | YES | YES   |                 |
| 36 | a    |          | 700.26                  | 31.66711               | YES | YES   |                 |
| 37 | a    |          | 743.47                  | 15.10509               | YES | YES   |                 |
| 38 | a    |          | 744.02                  | 15.53636               | YES | YES   |                 |
| 39 | a    |          | 745.29                  | 14.45767               | YES | YES   |                 |
| 40 | a    |          | 836.01                  | 0.11030                | YES | YES   |                 |
| 41 | a    |          | 836.91                  | 0.13707                | YES | YES   |                 |
| 42 | a    |          | 839.17                  | 0.14680                | YES | YES   |                 |
| 43 | a    |          | 904.14                  | 0.70325                | YES | YES   |                 |
| 44 | a    |          | 905.49                  | 0.68915                | YES | YES   |                 |
| 45 | a    |          | 906.22                  | 0.41315                | YES | YES   |                 |
| 46 | a    |          | 957.39                  | 0.00819                | YES | YES   |                 |
| 47 | a    |          | 957.92                  | 0.03083                | YES | YES   |                 |
| 48 | a    |          | 959.08                  | 0.09644                | YES | YES   |                 |
| 49 | a    |          | 982.45                  | 0.18753                | YES | YES   |                 |
| 50 | a    |          | 982.76                  | 0.78649                | YES | YES   |                 |

## P(<sup>t</sup>Bu)<sub>3</sub>

bp86 energy (au): -814.4052431920

pbe0\_def2-tzvpp\_sp energy (au): -814.3312084563

Zero point energy (au): 0.3562707

Entropy (kJ mol<sup>-1</sup>): 0.54003

Chemical potential (kJ mol<sup>-1</sup>): 825.19

XYZ coordinates:

40

|   |          |          |          |
|---|----------|----------|----------|
| P | 0.69066  | -0.00005 | -0.00014 |
| C | -0.02585 | 1.72088  | -0.61588 |
| C | -1.50487 | 1.76254  | -1.05129 |
| H | -1.77928 | 2.80416  | -1.34629 |
| C | 0.87862  | 2.16356  | -1.79616 |
| H | 0.61793  | 3.20892  | -2.08725 |
| H | 0.76320  | 1.53445  | -2.69987 |
| H | 1.95223  | 2.14835  | -1.50606 |
| C | -0.02585 | -1.39396 | -1.18214 |
| C | -1.50465 | -1.79242 | -1.00054 |
| H | -1.77839 | -2.56916 | -1.75472 |
| H | -2.19515 | -0.93523 | -1.14401 |
| H | -1.70704 | -2.23029 | -0.00078 |
| H | 0.76285  | -3.10563 | 0.02069  |
| H | 1.95250  | -2.37747 | -1.10641 |
| H | 0.61910  | -3.41137 | -1.73572 |
| C | 0.19252  | -0.96657 | -2.65232 |
| H | 1.24219  | -0.65136 | -2.84205 |
| H | -0.48553 | -0.14964 | -2.97438 |
| H | -0.01465 | -1.84051 | -3.31375 |
| C | -0.02580 | -0.32704 | 1.79815  |
| C | 0.19249  | -1.81387 | 2.16333  |
| H | -0.01479 | -1.94939 | 3.25093  |
| H | 1.24203  | -2.13550 | 1.98481  |
| H | -0.48557 | -2.50131 | 1.61697  |
| C | -1.50466 | 0.02975  | 2.05230  |
| H | -2.19500 | -0.52336 | 1.38189  |
| H | -1.70714 | 1.11436  | 1.93153  |
| H | -1.77852 | -0.23477 | 3.10215  |
| C | 0.87910  | 0.47364  | 2.77116  |
| H | 0.76294  | 1.57078  | 2.67876  |
| H | 1.95274  | 0.23044  | 2.61203  |
| H | 0.61935  | 0.20295  | 3.82202  |
| H | -1.70747 | 1.11626  | -1.93085 |
| H | -2.19506 | 1.45754  | -0.23727 |
| C | 0.19283  | 2.78054  | 0.48914  |
| H | -0.01360 | 3.79059  | 0.06290  |
| H | -0.48577 | 2.65185  | 1.35747  |
| H | 1.24241  | 2.78632  | 0.85729  |
| C | 0.87903  | -2.63707 | -0.97539 |

Vibrational Spectrum (first 50 lines):

| #  | mode | symmetry | wave number | IR intensity | selection rules |
|----|------|----------|-------------|--------------|-----------------|
| #  |      | cm**(-1) | km/mol      | IR           | RAMAN           |
| 1  |      | 0.00     | 0.00000     | -            | -               |
| 2  |      | 0.00     | 0.00000     | -            | -               |
| 3  |      | 0.00     | 0.00000     | -            | -               |
| 4  |      | 0.00     | 0.00000     | -            | -               |
| 5  |      | 0.00     | 0.00000     | -            | -               |
| 6  |      | 0.00     | 0.00000     | -            | -               |
| 7  | a    | 90.78    | 0.01132     | YES          | YES             |
| 8  | a    | 93.08    | 0.01106     | YES          | YES             |
| 9  | a    | 122.53   | 0.00017     | YES          | YES             |
| 10 | a    | 171.60   | 0.05700     | YES          | YES             |
| 11 | a    | 180.22   | 0.01806     | YES          | YES             |
| 12 | a    | 182.58   | 0.00701     | YES          | YES             |
| 13 | a    | 196.99   | 0.03585     | YES          | YES             |
| 14 | a    | 201.63   | 0.01152     | YES          | YES             |
| 15 | a    | 208.08   | 0.03829     | YES          | YES             |
| 16 | a    | 240.61   | 0.05602     | YES          | YES             |
| 17 | a    | 243.99   | 0.11735     | YES          | YES             |
| 18 | a    | 247.03   | 0.16993     | YES          | YES             |
| 19 | a    | 257.22   | 0.31294     | YES          | YES             |
| 20 | a    | 258.09   | 0.26933     | YES          | YES             |
| 21 | a    | 268.93   | 0.02843     | YES          | YES             |
| 22 | a    | 277.65   | 0.07710     | YES          | YES             |
| 23 | a    | 282.81   | 0.06682     | YES          | YES             |
| 24 | a    | 293.03   | 0.01892     | YES          | YES             |
| 25 | a    | 331.54   | 0.22205     | YES          | YES             |
| 26 | a    | 342.09   | 0.28941     | YES          | YES             |
| 27 | a    | 347.72   | 0.30608     | YES          | YES             |
| 28 | a    | 351.87   | 0.03473     | YES          | YES             |
| 29 | a    | 364.92   | 0.12790     | YES          | YES             |
| 30 | a    | 367.25   | 0.18799     | YES          | YES             |
| 31 | a    | 397.97   | 0.31752     | YES          | YES             |
| 32 | a    | 399.17   | 0.28936     | YES          | YES             |
| 33 | a    | 401.08   | 0.34610     | YES          | YES             |
| 34 | a    | 450.03   | 3.63619     | YES          | YES             |
| 35 | a    | 452.13   | 3.68777     | YES          | YES             |
| 36 | a    | 472.45   | 0.66880     | YES          | YES             |
| 37 | a    | 530.62   | 0.15721     | YES          | YES             |
| 38 | a    | 555.82   | 4.75781     | YES          | YES             |
| 39 | a    | 556.99   | 4.78828     | YES          | YES             |
| 40 | a    | 793.38   | 10.69000    | YES          | YES             |
| 41 | a    | 795.32   | 9.57779     | YES          | YES             |
| 42 | a    | 797.78   | 3.50892     | YES          | YES             |
| 43 | a    | 910.48   | 1.83637     | YES          | YES             |
| 44 | a    | 911.11   | 2.32124     | YES          | YES             |
| 45 | a    | 912.28   | 1.81416     | YES          | YES             |
| 46 | a    | 918.26   | 0.48107     | YES          | YES             |
| 47 | a    | 919.83   | 0.90826     | YES          | YES             |
| 48 | a    | 921.27   | 1.21790     | YES          | YES             |
| 49 | a    | 925.19   | 0.20480     | YES          | YES             |
| 50 | a    | 930.17   | 0.79070     | YES          | YES             |

**[GaCl<sub>4</sub>]<sup>-</sup>**

bp86 energy (au): -3765.6403205050

pbe0\_def2-tzvpp\_sp energy (au): -3765.197072358

Zero point energy (au): 0.0047151

Entropy (kJ mol<sup>-1</sup>): 0.36250

Chemical potential (kJ mol<sup>-1</sup>): -73.09

XYZ coordinates:

5

|    |          |          |          |
|----|----------|----------|----------|
| Ga | 0.00000  | 0.00000  | 0.00000  |
| Cl | -1.28592 | -1.28592 | -1.28592 |
| Cl | 1.28592  | 1.28592  | -1.28592 |
| Cl | 1.28592  | -1.28592 | 1.28592  |
| Cl | -1.28592 | 1.28592  | 1.28592  |

Vibrational Spectrum:

| #  | mode | symmetry             | wave number | IR intensity | selection rules |
|----|------|----------------------|-------------|--------------|-----------------|
| #  |      | cm <sup>**(-1)</sup> | km/mol      | IR           | RAMAN           |
| 1  |      | 0.00                 | 0.00000     | -            | -               |
| 2  |      | 0.00                 | 0.00000     | -            | -               |
| 3  |      | 0.00                 | 0.00000     | -            | -               |
| 4  |      | 0.00                 | 0.00000     | -            | -               |
| 5  |      | 0.00                 | 0.00000     | -            | -               |
| 6  |      | 0.00                 | 0.00000     | -            | -               |
| 7  | e    | 101.43               | 0.00000     | NO           | YES             |
| 8  | e    | 101.43               | 0.00000     | NO           | YES             |
| 9  | t2   | 144.32               | 8.04866     | YES          | YES             |
| 10 | t2   | 144.32               | 8.04866     | YES          | YES             |
| 11 | t2   | 144.32               | 8.04866     | YES          | YES             |
| 12 | a1   | 318.59               | 0.00000     | NO           | YES             |
| 13 | t2   | 371.75               | 79.94531    | YES          | YES             |
| 14 | t2   | 371.75               | 79.94531    | YES          | YES             |
| 15 | t2   | 371.75               | 79.94531    | YES          | YES             |

**[PhS]<sup>+</sup>**

bp86 energy (au): -629.2578512224

pbe0\_def2-tzvpp\_sp energy (au): -629.1687227827

Zero point energy (au): 0.0881712

Entropy (kJ mol<sup>-1</sup>): 0.32770

Chemical potential (kJ mol<sup>-1</sup>): 151.83

XYZ coordinates:

12

|   |          |          |          |
|---|----------|----------|----------|
| C | -2.27142 | -0.00000 | -0.00154 |
| H | -3.37568 | -0.00032 | -0.00325 |
| C | -0.20146 | 1.26343  | 0.00212  |
| H | 0.37217  | 2.20458  | 0.00319  |
| C | -1.58518 | 1.24917  | -0.00071 |
| H | -2.15958 | 2.18935  | -0.00159 |
| C | 0.53988  | 0.00009  | 0.00197  |
| C | -0.20148 | -1.26341 | 0.00188  |
| H | 0.37247  | -2.20437 | 0.00257  |
| C | -1.58515 | -1.24922 | -0.00045 |
| H | -2.15964 | -2.18933 | -0.00111 |
| S | 2.20567  | -0.00002 | -0.00122 |

Vibrational Spectrum:

| # mode # | symmetry | wave number<br>cm <sup>**(-1)</sup> | km/mol   | IR intensity<br>IR | selection rules<br>RAMAN |
|----------|----------|-------------------------------------|----------|--------------------|--------------------------|
| 1        |          | 0.00                                | 0.00000  | -                  | -                        |
| 2        |          | 0.00                                | 0.00000  | -                  | -                        |
| 3        |          | 0.00                                | 0.00000  | -                  | -                        |
| 4        |          | 0.00                                | 0.00000  | -                  | -                        |
| 5        |          | 0.00                                | 0.00000  | -                  | -                        |
| 6        |          | 0.00                                | 0.00000  | -                  | -                        |
| 7        | a        | 106.86                              | 0.00191  | YES                | YES                      |
| 8        | a        | 295.74                              | 0.00857  | YES                | YES                      |
| 9        | a        | 312.69                              | 0.00004  | YES                | YES                      |
| 10       | a        | 372.68                              | 0.19608  | YES                | YES                      |
| 11       | a        | 429.59                              | 0.14768  | YES                | YES                      |
| 12       | a        | 566.35                              | 2.48383  | YES                | YES                      |
| 13       | a        | 611.66                              | 43.29091 | YES                | YES                      |
| 14       | a        | 720.04                              | 2.98407  | YES                | YES                      |
| 15       | a        | 784.90                              | 27.64036 | YES                | YES                      |
| 16       | a        | 797.63                              | 0.00012  | YES                | YES                      |
| 17       | a        | 963.37                              | 5.45166  | YES                | YES                      |
| 18       | a        | 979.56                              | 0.69445  | YES                | YES                      |
| 19       | a        | 986.76                              | 7.57082  | YES                | YES                      |
| 20       | a        | 991.51                              | 0.00015  | YES                | YES                      |
| 21       | a        | 1025.07                             | 1.76033  | YES                | YES                      |

|    |   |         |           |     |     |
|----|---|---------|-----------|-----|-----|
| 22 | a | 1072.12 | 4.87161   | YES | YES |
| 23 | a | 1121.32 | 23.94289  | YES | YES |
| 24 | a | 1148.21 | 11.43442  | YES | YES |
| 25 | a | 1177.90 | 0.00958   | YES | YES |
| 26 | a | 1240.52 | 6.87264   | YES | YES |
| 27 | a | 1352.76 | 0.04051   | YES | YES |
| 28 | a | 1412.47 | 17.29113  | YES | YES |
| 29 | a | 1462.82 | 107.94732 | YES | YES |
| 30 | a | 1508.60 | 11.78970  | YES | YES |
| 31 | a | 1607.11 | 129.95451 | YES | YES |
| 32 | a | 3115.94 | 0.78407   | YES | YES |
| 33 | a | 3128.54 | 1.08674   | YES | YES |
| 34 | a | 3130.14 | 11.07445  | YES | YES |
| 35 | a | 3138.62 | 19.60609  | YES | YES |

## PhSCI.GaCl3\_iso2

bp86 energy (au): -4395.0797564920

pbe0\_def2-tzvpp\_sp energy (au): -4394.544979996

Zero point energy (au): 0.0944103

Entropy (kJ mol<sup>-1</sup>): 0.56903

Chemical potential (kJ mol<sup>-1</sup>): 120.92

XYZ coordinates:

17

|    |          |          |          |
|----|----------|----------|----------|
| S  | 0.37738  | 0.34281  | 1.56337  |
| C  | -1.10682 | -0.37191 | 0.94495  |
| C  | -1.14716 | -0.93927 | -0.35440 |
| H  | -0.21686 | -1.01366 | -0.94026 |
| C  | -2.36376 | -1.41345 | -0.86020 |
| H  | -2.40098 | -1.86083 | -1.86664 |
| C  | -3.53828 | -1.31131 | -0.08809 |
| H  | -4.49441 | -1.67901 | -0.49606 |
| C  | -3.50127 | -0.74715 | 1.20129  |
| H  | -4.42347 | -0.67270 | 1.80004  |
| C  | -2.28622 | -0.28927 | 1.72846  |
| H  | -2.23361 | 0.14313  | 2.74023  |
| Ga | 3.41952  | -1.63045 | 0.63263  |
| Cl | 1.49678  | -1.42097 | 2.27626  |
| Cl | 4.32055  | -3.31835 | 1.65258  |
| Cl | 4.33884  | 0.31654  | 0.83823  |
| Cl | 2.40377  | -2.03719 | -1.25039 |

Vibrational Spectrum (first 50 lines):

| #  | mode | symmetry             | wave number | IR intensity | selection rules |
|----|------|----------------------|-------------|--------------|-----------------|
| #  |      | cm <sup>**(-1)</sup> | km/mol      | IR           | RAMAN           |
| 1  |      | 0.00                 | 0.00000     | -            | -               |
| 2  |      | 0.00                 | 0.00000     | -            | -               |
| 3  |      | 0.00                 | 0.00000     | -            | -               |
| 4  |      | 0.00                 | 0.00000     | -            | -               |
| 5  |      | 0.00                 | 0.00000     | -            | -               |
| 6  |      | 0.00                 | 0.00000     | -            | -               |
| 7  | a    | 16.65                | 0.08603     | YES          | YES             |
| 8  | a    | 22.63                | 0.05536     | YES          | YES             |
| 9  | a    | 42.42                | 1.20154     | YES          | YES             |
| 10 | a    | 48.16                | 0.41008     | YES          | YES             |
| 11 | a    | 60.08                | 1.24489     | YES          | YES             |
| 12 | a    | 85.82                | 0.16055     | YES          | YES             |
| 13 | a    | 99.13                | 0.28959     | YES          | YES             |
| 14 | a    | 122.26               | 5.11986     | YES          | YES             |
| 15 | a    | 125.95               | 4.95776     | YES          | YES             |

|    |   |         |          |     |     |
|----|---|---------|----------|-----|-----|
| 16 | a | 136.63  | 32.92721 | YES | YES |
| 17 | a | 175.81  | 46.55457 | YES | YES |
| 18 | a | 212.53  | 18.74553 | YES | YES |
| 19 | a | 275.81  | 4.14892  | YES | YES |
| 20 | a | 334.63  | 43.46124 | YES | YES |
| 21 | a | 351.03  | 15.82188 | YES | YES |
| 22 | a | 397.72  | 6.97891  | YES | YES |
| 23 | a | 407.54  | 4.93976  | YES | YES |
| 24 | a | 419.29  | 70.54416 | YES | YES |
| 25 | a | 430.74  | 59.88078 | YES | YES |
| 26 | a | 483.53  | 10.67991 | YES | YES |
| 27 | a | 602.44  | 0.25931  | YES | YES |
| 28 | a | 681.61  | 32.17965 | YES | YES |
| 29 | a | 706.59  | 3.57728  | YES | YES |
| 30 | a | 753.58  | 26.66601 | YES | YES |
| 31 | a | 829.34  | 0.12661  | YES | YES |
| 32 | a | 927.08  | 2.32209  | YES | YES |
| 33 | a | 967.97  | 0.19824  | YES | YES |
| 34 | a | 983.63  | 0.71441  | YES | YES |
| 35 | a | 997.37  | 0.21264  | YES | YES |
| 36 | a | 1017.98 | 0.20351  | YES | YES |
| 37 | a | 1067.72 | 58.80252 | YES | YES |
| 38 | a | 1071.08 | 4.54691  | YES | YES |
| 39 | a | 1145.88 | 0.28320  | YES | YES |
| 40 | a | 1160.00 | 4.46829  | YES | YES |
| 41 | a | 1283.09 | 1.07179  | YES | YES |
| 42 | a | 1367.38 | 4.99229  | YES | YES |
| 43 | a | 1433.77 | 16.86381 | YES | YES |
| 44 | a | 1455.51 | 0.64346  | YES | YES |
| 45 | a | 1575.16 | 0.29908  | YES | YES |
| 46 | a | 1590.71 | 38.67749 | YES | YES |
| 47 | a | 3100.91 | 1.07884  | YES | YES |
| 48 | a | 3109.87 | 10.38420 | YES | YES |
| 49 | a | 3115.13 | 0.68609  | YES | YES |
| 50 | a | 3122.07 | 6.70751  | YES | YES |



## [PhSe]+

bp86 energy (au): -2632.7001982390

pbe0\_def2-tzvpp\_sp energy (au): -2632.380331126

Zero point energy (au): 0.0876259

Entropy (kJ mol<sup>-1</sup>): 0.33942

Chemical potential (kJ mol<sup>-1</sup>): 147.39

XYZ coordinates:

12

|    |          |          |          |
|----|----------|----------|----------|
| C  | -3.00905 | -0.00005 | 0.00011  |
| H  | -4.11279 | -0.00031 | 0.00002  |
| C  | -0.93379 | 1.25804  | 0.00057  |
| H  | -0.36628 | 2.20274  | 0.00097  |
| C  | -2.32013 | 1.24532  | -0.00061 |
| H  | -2.89055 | 2.18779  | -0.00062 |
| C  | -0.20210 | 0.00005  | -0.00002 |
| C  | -0.93371 | -1.25797 | -0.00023 |
| H  | -0.36632 | -2.20271 | -0.00077 |
| C  | -2.32002 | -1.24535 | 0.00024  |
| H  | -2.89032 | -2.18786 | 0.00080  |
| Se | 1.61404  | 0.00000  | -0.00001 |

Vibrational Spectrum:

| # mode # | symmetry | wave number<br>cm <sup>**(-1)</sup> | km/mol   | IR intensity<br>IR | selection rules<br>RAMAN |
|----------|----------|-------------------------------------|----------|--------------------|--------------------------|
| 1        |          | 0.00                                | 0.00000  | -                  | -                        |
| 2        |          | 0.00                                | 0.00000  | -                  | -                        |
| 3        |          | 0.00                                | 0.00000  | -                  | -                        |
| 4        |          | 0.00                                | 0.00000  | -                  | -                        |
| 5        |          | 0.00                                | 0.00000  | -                  | -                        |
| 6        |          | 0.00                                | 0.00000  | -                  | -                        |
| 7        | a        | 98.47                               | 0.03835  | YES                | YES                      |
| 8        | a        | 245.75                              | 0.00012  | YES                | YES                      |
| 9        | a        | 320.65                              | 0.00001  | YES                | YES                      |
| 10       | a        | 333.00                              | 0.01887  | YES                | YES                      |
| 11       | a        | 377.30                              | 0.00310  | YES                | YES                      |
| 12       | a        | 569.44                              | 1.91231  | YES                | YES                      |
| 13       | a        | 617.00                              | 44.17870 | YES                | YES                      |
| 14       | a        | 684.32                              | 2.77772  | YES                | YES                      |
| 15       | a        | 774.29                              | 28.57703 | YES                | YES                      |
| 16       | a        | 803.26                              | 0.00007  | YES                | YES                      |
| 17       | a        | 967.75                              | 10.93717 | YES                | YES                      |
| 18       | a        | 970.54                              | 0.78330  | YES                | YES                      |
| 19       | a        | 989.20                              | 0.00045  | YES                | YES                      |
| 20       | a        | 992.26                              | 7.14072  | YES                | YES                      |
| 21       | a        | 1020.86                             | 1.14675  | YES                | YES                      |
| 22       | a        | 1062.21                             | 27.48814 | YES                | YES                      |

|    |   |         |           |     |     |
|----|---|---------|-----------|-----|-----|
| 23 | a | 1074.69 | 4.69575   | YES | YES |
| 24 | a | 1148.80 | 8.12238   | YES | YES |
| 25 | a | 1171.12 | 2.66994   | YES | YES |
| 26 | a | 1250.50 | 8.69795   | YES | YES |
| 27 | a | 1356.77 | 0.00021   | YES | YES |
| 28 | a | 1416.33 | 13.81695  | YES | YES |
| 29 | a | 1453.31 | 90.12197  | YES | YES |
| 30 | a | 1506.96 | 5.99416   | YES | YES |
| 31 | a | 1601.96 | 140.31545 | YES | YES |
| 32 | a | 3118.40 | 0.23697   | YES | YES |
| 33 | a | 3128.20 | 1.42248   | YES | YES |
| 34 | a | 3130.17 | 9.22751   | YES | YES |
| 35 | a | 3138.50 | 15.05361  | YES | YES |

## PhSeCl.GaCl3\_iso2

bp86 energy (au): -6398.5257817610

pbe0\_def2-tzvpp\_sp energy (au): -6397.759766818

Zero point energy (au): 0.0937054

Entropy (kJ mol<sup>-1</sup>): 0.58023

Chemical potential (kJ mol<sup>-1</sup>): 116.58

XYZ coordinates:

17

|    |          |          |          |
|----|----------|----------|----------|
| Se | 0.46654  | 0.42794  | 1.58517  |
| C  | -1.14516 | -0.34650 | 0.92889  |
| C  | -1.17970 | -0.93274 | -0.35927 |
| H  | -0.25227 | -1.01162 | -0.94902 |
| C  | -2.39432 | -1.42512 | -0.85632 |
| H  | -2.42777 | -1.88884 | -1.85558 |
| C  | -3.56843 | -1.32130 | -0.08500 |
| H  | -4.52189 | -1.70408 | -0.48524 |
| C  | -3.53315 | -0.73694 | 1.19488  |
| H  | -4.45400 | -0.66282 | 1.79600  |
| C  | -2.32050 | -0.25868 | 1.71307  |
| H  | -2.27547 | 0.18575  | 2.72010  |
| Ga | 3.46860  | -1.66181 | 0.64030  |
| Cl | 1.56821  | -1.47985 | 2.29674  |
| Cl | 4.43581  | -3.34134 | 1.60890  |
| Cl | 4.34477  | 0.30751  | 0.86372  |
| Cl | 2.43273  | -2.05258 | -1.23534 |

Vibrational Spectrum (first 50 lines):

| #  | mode | symmetry             | wave number | IR intensity | selection rules |
|----|------|----------------------|-------------|--------------|-----------------|
| #  |      | cm <sup>**(-1)</sup> | km/mol      | IR           | RAMAN           |
| 1  |      | 0.00                 | 0.00000     | -            | -               |
| 2  |      | 0.00                 | 0.00000     | -            | -               |
| 3  |      | 0.00                 | 0.00000     | -            | -               |
| 4  |      | 0.00                 | 0.00000     | -            | -               |
| 5  |      | 0.00                 | 0.00000     | -            | -               |
| 6  |      | 0.00                 | 0.00000     | -            | -               |
| 7  | a    | 17.89                | 0.06201     | YES          | YES             |
| 8  | a    | 22.09                | 0.03164     | YES          | YES             |
| 9  | a    | 37.94                | 1.03255     | YES          | YES             |
| 10 | a    | 43.11                | 0.05628     | YES          | YES             |
| 11 | a    | 54.26                | 1.03562     | YES          | YES             |
| 12 | a    | 77.47                | 0.49830     | YES          | YES             |
| 13 | a    | 95.44                | 0.17011     | YES          | YES             |
| 14 | a    | 122.44               | 4.70701     | YES          | YES             |
| 15 | a    | 126.28               | 5.25827     | YES          | YES             |
| 16 | a    | 137.05               | 28.37463    | YES          | YES             |

|    |   |         |          |     |     |
|----|---|---------|----------|-----|-----|
| 17 | a | 176.64  | 37.77423 | YES | YES |
| 18 | a | 199.92  | 23.05237 | YES | YES |
| 19 | a | 236.27  | 1.46693  | YES | YES |
| 20 | a | 295.42  | 45.12900 | YES | YES |
| 21 | a | 311.58  | 2.09164  | YES | YES |
| 22 | a | 343.83  | 5.72358  | YES | YES |
| 23 | a | 398.53  | 1.48273  | YES | YES |
| 24 | a | 418.51  | 63.22407 | YES | YES |
| 25 | a | 429.10  | 58.74071 | YES | YES |
| 26 | a | 461.33  | 8.78114  | YES | YES |
| 27 | a | 602.23  | 0.20937  | YES | YES |
| 28 | a | 673.12  | 0.72426  | YES | YES |
| 29 | a | 684.91  | 31.07643 | YES | YES |
| 30 | a | 746.06  | 28.91137 | YES | YES |
| 31 | a | 830.85  | 0.12106  | YES | YES |
| 32 | a | 924.03  | 2.08520  | YES | YES |
| 33 | a | 966.98  | 0.24086  | YES | YES |
| 34 | a | 981.45  | 0.97220  | YES | YES |
| 35 | a | 995.93  | 0.19738  | YES | YES |
| 36 | a | 1015.41 | 1.44357  | YES | YES |
| 37 | a | 1053.07 | 36.94745 | YES | YES |
| 38 | a | 1070.85 | 3.23650  | YES | YES |
| 39 | a | 1145.64 | 0.18666  | YES | YES |
| 40 | a | 1161.98 | 6.57676  | YES | YES |
| 41 | a | 1286.01 | 1.84070  | YES | YES |
| 42 | a | 1365.81 | 3.87043  | YES | YES |
| 43 | a | 1431.66 | 16.55561 | YES | YES |
| 44 | a | 1455.82 | 0.60164  | YES | YES |
| 45 | a | 1577.80 | 0.32117  | YES | YES |
| 46 | a | 1587.31 | 27.14151 | YES | YES |
| 47 | a | 3099.78 | 0.75487  | YES | YES |
| 48 | a | 3108.88 | 8.63984  | YES | YES |
| 49 | a | 3114.57 | 1.28728  | YES | YES |
| 50 | a | 3121.04 | 4.58618  | YES | YES |

**[PhSe(PPh3)]<sup>+</sup>**

bp86 energy (au): -3668.5743178450

pbe0\_def2-tzvpp\_sp energy (au): -3668.122090030

Zero point energy (au): 0.3570935

Entropy (kJ mol<sup>-1</sup>): 0.71665

Chemical potential (kJ mol<sup>-1</sup>): 788.50

XYZ coordinates:

46

|    |            |            |            |
|----|------------|------------|------------|
| C  | -1.2029585 | 4.9630951  | -1.1887858 |
| H  | -1.5053128 | 5.9851064  | -1.4688662 |
| C  | 2.9694561  | -1.6896173 | -1.6962984 |
| H  | 3.4628223  | -2.6470298 | -1.4638532 |
| Se | -1.8805974 | -0.5074414 | -0.1949047 |
| P  | 0.0670997  | 0.6704024  | -0.0102287 |
| C  | 2.6979776  | 0.2509933  | -3.1461022 |
| H  | 2.9815098  | 0.8174381  | -4.0477052 |
| C  | -1.6053777 | 3.8717505  | -1.9796202 |
| H  | -2.2218157 | 4.0352252  | -2.8780984 |
| C  | -0.4405941 | 2.3570074  | -0.4684725 |
| C  | 1.9856913  | -1.1904207 | -0.8297377 |
| H  | 1.7188570  | -1.7574850 | 0.0765091  |
| C  | 1.6441992  | 0.8032563  | 4.3394812  |
| H  | 2.0167499  | 0.8567901  | 5.3752530  |
| C  | 1.3563708  | 0.0435728  | -1.1252641 |
| C  | -0.5773239 | -4.3880028 | -1.1841395 |
| H  | -0.3947140 | -4.9565042 | -2.1104470 |
| C  | -1.2289404 | 2.5670734  | -1.6260350 |
| H  | -1.5549501 | 1.7163984  | -2.2468332 |
| C  | 0.6948635  | 0.6564688  | 1.6994825  |
| C  | 0.2616047  | 0.7112410  | 4.0953691  |
| H  | -0.4498563 | 0.6938085  | 4.9365236  |
| C  | 1.7112703  | 0.7629311  | -2.2893881 |
| H  | 1.2309285  | 1.7263152  | -2.5223442 |
| C  | 3.3256190  | -0.9720048 | -2.8520777 |
| H  | 4.1014175  | -1.3678190 | -3.5274458 |
| C  | -0.0399285 | 3.4533987  | 0.3287403  |
| H  | 0.5653194  | 3.2956356  | 1.2354366  |
| C  | 2.0850302  | 0.7526702  | 1.9435864  |
| H  | 2.8031059  | 0.7729481  | 1.1084754  |
| C  | -0.2180408 | 0.6368542  | 2.7789887  |
| H  | -1.3013090 | 0.5582864  | 2.5885086  |
| C  | -1.0738217 | -2.9407800 | 1.1866935  |
| H  | -1.2856966 | -2.3802849 | 2.1106655  |
| C  | -0.4231488 | 4.7531835  | -0.0383296 |
| H  | -0.1121901 | 5.6072722  | 0.5843812  |
| C  | 2.5519118  | 0.8250169  | 3.2663057  |
| H  | 3.6347662  | 0.8976639  | 3.4570087  |
| C  | -0.6753739 | -4.2867293 | 1.2506119  |
| H  | -0.5700288 | -4.7770611 | 2.2320643  |
| C  | -0.9677235 | -3.0402357 | -1.2632873 |

|   |            |            |            |
|---|------------|------------|------------|
| H | -1.0913621 | -2.5526882 | -2.2430025 |
| C | -0.4289884 | -5.0088719 | 0.0686527  |
| H | -0.1279048 | -6.0675193 | 0.1250493  |
| C | -1.2106352 | -2.3230973 | -0.0735956 |

Vibrational Spectrum (first 50 lines):

| #  | mode | symmetry | wave number | IR intensity | selection rules |
|----|------|----------|-------------|--------------|-----------------|
| #  |      | cm**(-1) | km/mol      | IR           | RAMAN           |
| 1  |      | 0.00     | 0.00000     | -            | -               |
| 2  |      | 0.00     | 0.00000     | -            | -               |
| 3  |      | 0.00     | 0.00000     | -            | -               |
| 4  |      | 0.00     | 0.00000     | -            | -               |
| 5  |      | 0.00     | 0.00000     | -            | -               |
| 6  |      | 0.00     | 0.00000     | -            | -               |
| 7  | a    | 17.48    | 0.11709     | YES          | YES             |
| 8  | a    | 28.10    | 0.03472     | YES          | YES             |
| 9  | a    | 32.84    | 0.04346     | YES          | YES             |
| 10 | a    | 40.54    | 0.01081     | YES          | YES             |
| 11 | a    | 45.13    | 0.23538     | YES          | YES             |
| 12 | a    | 48.28    | 0.08080     | YES          | YES             |
| 13 | a    | 55.84    | 0.18636     | YES          | YES             |
| 14 | a    | 59.58    | 0.11391     | YES          | YES             |
| 15 | a    | 72.29    | 0.25729     | YES          | YES             |
| 16 | a    | 86.98    | 0.44585     | YES          | YES             |
| 17 | a    | 98.76    | 0.59693     | YES          | YES             |
| 18 | a    | 176.47   | 1.05789     | YES          | YES             |
| 19 | a    | 186.49   | 2.37706     | YES          | YES             |
| 20 | a    | 204.62   | 1.47131     | YES          | YES             |
| 21 | a    | 208.30   | 0.29038     | YES          | YES             |
| 22 | a    | 230.64   | 1.06555     | YES          | YES             |
| 23 | a    | 238.27   | 0.13391     | YES          | YES             |
| 24 | a    | 241.44   | 1.49802     | YES          | YES             |
| 25 | a    | 256.40   | 0.35228     | YES          | YES             |
| 26 | a    | 267.82   | 0.27564     | YES          | YES             |
| 27 | a    | 298.80   | 2.08488     | YES          | YES             |
| 28 | a    | 392.69   | 0.07565     | YES          | YES             |
| 29 | a    | 395.15   | 0.01917     | YES          | YES             |
| 30 | a    | 400.93   | 0.33120     | YES          | YES             |
| 31 | a    | 401.39   | 0.08544     | YES          | YES             |
| 32 | a    | 417.87   | 7.30067     | YES          | YES             |
| 33 | a    | 438.08   | 8.37735     | YES          | YES             |
| 34 | a    | 443.88   | 8.29827     | YES          | YES             |
| 35 | a    | 465.60   | 6.59278     | YES          | YES             |
| 36 | a    | 493.53   | 51.53863    | YES          | YES             |
| 37 | a    | 505.33   | 74.58828    | YES          | YES             |
| 38 | a    | 519.19   | 71.36798    | YES          | YES             |
| 39 | a    | 602.93   | 0.00477     | YES          | YES             |
| 40 | a    | 605.12   | 0.34703     | YES          | YES             |
| 41 | a    | 605.65   | 0.16925     | YES          | YES             |
| 42 | a    | 606.35   | 0.10623     | YES          | YES             |
| 43 | a    | 660.71   | 1.85846     | YES          | YES             |
| 44 | a    | 676.35   | 5.37229     | YES          | YES             |
| 45 | a    | 691.72   | 48.98079    | YES          | YES             |
| 46 | a    | 692.14   | 10.31686    | YES          | YES             |
| 47 | a    | 693.52   | 24.28370    | YES          | YES             |
| 48 | a    | 694.82   | 12.13249    | YES          | YES             |

|    |   |        |          |     |     |
|----|---|--------|----------|-----|-----|
| 49 | a | 708.73 | 22.81948 | YES | YES |
| 50 | a | 709.40 | 25.84263 | YES | YES |

**[PhSe(PPh3).PPh3]<sup>+</sup>**

bp86 energy (au): -4704.3262892010

pbe0\_def2-tzvpp\_sp energy (au): -4703.719884263

Zero point energy (au): 0.6238542

Entropy (kJ mol<sup>-1</sup>): 1.12993

Chemical potential (kJ mol<sup>-1</sup>): 1414.95

XYZ coordinates:

80

|    |          |          |          |
|----|----------|----------|----------|
| C  | -4.77031 | 0.75293  | 3.41992  |
| H  | -5.84301 | 0.93231  | 3.59946  |
| C  | 2.85339  | 2.28945  | 4.08880  |
| H  | 3.95379  | 2.26579  | 4.03190  |
| Se | -0.18113 | 0.02287  | -0.01555 |
| P  | -0.24779 | 0.02340  | 2.61391  |
| C  | 0.80114  | 3.33486  | 4.87541  |
| H  | 0.28780  | 4.12961  | 5.44095  |
| C  | -4.06923 | 1.54892  | 2.49655  |
| H  | -4.58933 | 2.35326  | 1.95122  |
| C  | -2.02698 | 0.29134  | 2.96186  |
| C  | 2.10472  | 1.29849  | 3.43608  |
| H  | 2.62401  | 0.50558  | 2.87361  |
| C  | 0.81835  | -4.11797 | 4.44467  |
| H  | 1.05867  | -5.10575 | 4.87058  |
| C  | 0.69075  | 1.31492  | 3.51115  |
| C  | 3.87387  | 1.23313  | -0.11249 |
| H  | 4.42276  | 2.18392  | -0.21455 |
| C  | -2.70445 | 1.31782  | 2.26129  |
| H  | -2.16195 | 1.94140  | 1.53085  |
| C  | 0.20689  | -1.59084 | 3.35572  |
| C  | 0.18819  | -4.02677 | 3.19031  |
| H  | -0.06669 | -4.94211 | 2.63143  |
| C  | 0.04255  | 2.34256  | 4.23192  |
| H  | -1.05649 | 2.36484  | 4.30030  |
| C  | 2.20423  | 3.31053  | 4.80652  |
| H  | 2.79570  | 4.08900  | 5.31547  |
| C  | -2.73660 | -0.50728 | 3.88639  |
| H  | -2.22121 | -1.31241 | 4.43356  |
| C  | 0.83901  | -1.68623 | 4.61547  |
| H  | 1.09324  | -0.77518 | 5.18003  |
| C  | -0.11185 | -2.76975 | 2.64250  |
| H  | -0.59691 | -2.70147 | 1.65429  |
| C  | 2.46477  | -1.19317 | 0.14138  |
| H  | 1.91640  | -2.14315 | 0.23601  |
| C  | -4.10344 | -0.27379 | 4.11089  |
| H  | -4.65059 | -0.89886 | 4.83516  |
| C  | 1.14306  | -2.94838 | 5.15333  |
| H  | 1.63502  | -3.01558 | 6.13732  |
| C  | 3.87094  | -1.18606 | 0.17036  |
| H  | 4.41737  | -2.13577 | 0.29035  |



|   |          |          |          |
|---|----------|----------|----------|
| C | 2.46762  | 1.23808  | -0.13013 |
| H | 1.92043  | 2.18781  | -0.23857 |
| C | 4.57578  | 0.02415  | 0.04040  |
| H | 5.67796  | 0.02501  | 0.05840  |
| C | 1.76492  | 0.02189  | -0.00624 |
| C | -4.74711 | -0.77426 | -3.47590 |
| H | -5.81582 | -0.96070 | -3.67030 |
| C | 2.89999  | -2.26961 | -4.02630 |
| H | 3.99998  | -2.20748 | -3.99979 |
| P | -0.23893 | -0.01225 | -2.62086 |
| C | 0.86436  | -3.42592 | -4.69448 |
| H | 0.36472  | -4.27164 | -5.19490 |
| C | -4.07736 | -1.50097 | -2.47598 |
| H | -4.61892 | -2.25658 | -1.88407 |
| C | -2.01369 | -0.29528 | -2.98074 |
| C | 2.13388  | -1.26081 | -3.42334 |
| H | 2.63392  | -0.41123 | -2.93050 |
| C | 0.82006  | 4.09788  | -4.52370 |
| H | 1.05800  | 5.07888  | -4.96592 |
| C | 0.71965  | -1.32346 | -3.46664 |
| C | -2.71693 | -1.26171 | -2.22301 |
| H | -2.19796 | -1.82999 | -1.43295 |
| C | 0.21572  | 1.58825  | -3.39139 |
| C | 0.18460  | 4.02670  | -3.27083 |
| H | -0.07697 | 4.95064  | -2.72971 |
| C | 0.08818  | -2.41619 | -4.10212 |
| H | -1.01099 | -2.47497 | -4.14519 |
| C | 2.26750  | -3.35509 | -4.65977 |
| H | 2.87173  | -4.14782 | -5.13037 |
| C | -2.69280 | 0.43501  | -3.98231 |
| H | -2.15707 | 1.19478  | -4.57372 |
| C | 0.85343  | 1.66368  | -4.65061 |
| H | 1.11370  | 0.74373  | -5.19850 |
| C | -0.11287 | 2.77875  | -2.70168 |
| H | -0.60342 | 2.72567  | -1.71508 |
| C | -4.05461 | 0.19298  | -4.22538 |
| H | -4.57767 | 0.76427  | -5.00925 |
| C | 1.15381  | 2.91761  | -5.20987 |
| H | 1.64973  | 2.96932  | -6.19278 |

Vibrational Spectrum (first 50 lines):

| #  | mode | symmetry | wave number | IR intensity | selection rules |
|----|------|----------|-------------|--------------|-----------------|
| #  |      | cm**(-1) | km/mol      | IR           | RAMAN           |
| 1  |      | 0.00     | 0.00000     | -            | -               |
| 2  |      | 0.00     | 0.00000     | -            | -               |
| 3  |      | 0.00     | 0.00000     | -            | -               |
| 4  |      | 0.00     | 0.00000     | -            | -               |
| 5  |      | 0.00     | 0.00000     | -            | -               |
| 6  |      | 0.00     | 0.00000     | -            | -               |
| 7  | a    | 8.38     | 0.00330     | YES          | YES             |
| 8  | a    | 13.96    | 0.21909     | YES          | YES             |
| 9  | a    | 17.06    | 0.13402     | YES          | YES             |
| 10 | a    | 19.97    | 3.21321     | YES          | YES             |
| 11 | a    | 25.21    | 6.63064     | YES          | YES             |
| 12 | a    | 26.99    | 0.75691     | YES          | YES             |
| 13 | a    | 32.07    | 22.52319    | YES          | YES             |

|    |   |        |          |     |     |
|----|---|--------|----------|-----|-----|
| 14 | a | 33.69  | 1.45398  | YES | YES |
| 15 | a | 37.44  | 0.11430  | YES | YES |
| 16 | a | 39.05  | 0.13234  | YES | YES |
| 17 | a | 42.09  | 4.63996  | YES | YES |
| 18 | a | 47.08  | 11.00608 | YES | YES |
| 19 | a | 47.57  | 0.85720  | YES | YES |
| 20 | a | 51.42  | 12.03972 | YES | YES |
| 21 | a | 54.58  | 0.18856  | YES | YES |
| 22 | a | 56.48  | 0.03530  | YES | YES |
| 23 | a | 58.64  | 0.01961  | YES | YES |
| 24 | a | 64.29  | 11.54196 | YES | YES |
| 25 | a | 67.17  | 1.49846  | YES | YES |
| 26 | a | 68.51  | 0.28158  | YES | YES |
| 27 | a | 76.35  | 72.97126 | YES | YES |
| 28 | a | 94.31  | 0.03737  | YES | YES |
| 29 | a | 112.97 | 0.54051  | YES | YES |
| 30 | a | 113.31 | 0.62153  | YES | YES |
| 31 | a | 183.80 | 1.81234  | YES | YES |
| 32 | a | 184.16 | 1.25158  | YES | YES |
| 33 | a | 191.36 | 0.47157  | YES | YES |
| 34 | a | 192.61 | 3.60493  | YES | YES |
| 35 | a | 199.44 | 8.77504  | YES | YES |
| 36 | a | 202.79 | 1.16955  | YES | YES |
| 37 | a | 210.42 | 19.12125 | YES | YES |
| 38 | a | 236.77 | 4.11701  | YES | YES |
| 39 | a | 237.30 | 1.01172  | YES | YES |
| 40 | a | 239.54 | 0.49570  | YES | YES |
| 41 | a | 253.51 | 0.50027  | YES | YES |
| 42 | a | 254.26 | 0.80020  | YES | YES |
| 43 | a | 261.98 | 0.66047  | YES | YES |
| 44 | a | 263.72 | 0.44246  | YES | YES |
| 45 | a | 301.81 | 0.42153  | YES | YES |
| 46 | a | 392.57 | 0.96983  | YES | YES |
| 47 | a | 394.04 | 0.66378  | YES | YES |
| 48 | a | 394.75 | 1.55261  | YES | YES |
| 49 | a | 395.32 | 1.34503  | YES | YES |
| 50 | a | 395.91 | 0.50461  | YES | YES |

**[PhSe(PtBu3).PPh3]<sup>+</sup>**

bp86 energy (au): -4482.9982779610

pbe0\_def2-tzvpp\_sp energy (au): -4482.464384557

Zero point energy (au): 0.7146983

Entropy (kJ mol<sup>-1</sup>): 1.11609

Chemical potential (kJ mol<sup>-1</sup>): 1662.76

XYZ coordinates:

86

|    |          |          |          |
|----|----------|----------|----------|
| P  | -2.12184 | 0.30541  | 0.02314  |
| Se | 0.57281  | 0.05258  | 0.02895  |
| C  | 0.37823  | -1.88760 | 0.04190  |
| C  | 0.02739  | -2.55181 | -1.15286 |
| H  | -0.08840 | -1.98338 | -2.08892 |
| C  | -0.18788 | -3.94111 | -1.14394 |
| H  | -0.46855 | -4.45360 | -2.07861 |
| C  | -0.04376 | -4.67262 | 0.04850  |
| H  | -0.20713 | -5.76257 | 0.05085  |
| C  | 0.30304  | -4.00907 | 1.23834  |
| H  | 0.40740  | -4.57529 | 2.17852  |
| C  | 0.50559  | -2.61722 | 1.24113  |
| H  | 0.74806  | -2.10102 | 2.18212  |
| C  | -3.18322 | -0.51350 | 1.27879  |
| C  | -3.09890 | -1.91836 | 1.42827  |
| H  | -2.39114 | -2.50580 | 0.82046  |
| C  | -3.90851 | -2.57530 | 2.36846  |
| H  | -3.83919 | -3.67020 | 2.47561  |
| C  | -4.79615 | -1.84162 | 3.17581  |
| H  | -5.42670 | -2.36082 | 3.91583  |
| C  | -4.87488 | -0.44529 | 3.03901  |
| H  | -5.56908 | 0.13521  | 3.66824  |
| C  | -4.07425 | 0.21994  | 2.09524  |
| H  | -4.14936 | 1.31393  | 1.99056  |
| C  | -2.31218 | 2.11323  | 0.28617  |
| C  | -3.07258 | 2.93149  | -0.57780 |
| H  | -3.59357 | 2.49003  | -1.44237 |
| C  | -3.17211 | 4.31200  | -0.33354 |
| H  | -3.77061 | 4.94248  | -1.01123 |
| C  | -2.51992 | 4.88556  | 0.77118  |
| H  | -2.60321 | 5.96819  | 0.96057  |
| C  | -1.76135 | 4.07573  | 1.63557  |
| H  | -1.25181 | 4.52102  | 2.50581  |
| C  | -1.64969 | 2.69747  | 1.39243  |
| H  | -1.05338 | 2.06835  | 2.07514  |
| C  | -2.86661 | -0.06097 | -1.61540 |
| C  | -4.12005 | -0.69816 | -1.74970 |
| H  | -4.69100 | -0.99150 | -0.85446 |
| C  | -4.64557 | -0.95362 | -3.02806 |
| H  | -5.62568 | -1.44871 | -3.12363 |
| C  | -3.93068 | -0.57605 | -4.17720 |
| H  | -4.34724 | -0.77700 | -5.17765 |

|   |          |          |          |
|---|----------|----------|----------|
| C | -2.68083 | 0.05742  | -4.04894 |
| H | -2.11658 | 0.35444  | -4.94825 |
| C | -2.14540 | 0.30755  | -2.77597 |
| H | -1.16021 | 0.79497  | -2.68112 |
| P | 3.19520  | 0.26535  | 0.01351  |
| C | 3.44797  | 1.78812  | -1.18394 |
| C | 4.80145  | 2.50442  | -0.97542 |
| H | 4.89848  | 3.30124  | -1.74847 |
| C | 2.29624  | 2.80530  | -0.98225 |
| H | 2.45787  | 3.64883  | -1.69172 |
| H | 2.25172  | 3.24070  | 0.03309  |
| H | 1.30537  | 2.36456  | -1.22309 |
| C | 3.67433  | 0.75722  | 1.84206  |
| C | 5.19904  | 0.77446  | 2.09051  |
| H | 5.38146  | 1.13420  | 3.12934  |
| H | 5.74194  | 1.45863  | 1.40712  |
| H | 5.65774  | -0.23262 | 2.01576  |
| H | 3.33098  | -1.28667 | 2.68221  |
| H | 1.89221  | -0.20283 | 2.71650  |
| H | 3.25565  | 0.06011  | 3.85486  |
| C | 3.09228  | 2.14978  | 2.17674  |
| H | 1.99865  | 2.20554  | 1.98640  |
| H | 3.59695  | 2.97698  | 1.63807  |
| H | 3.24525  | 2.33168  | 3.26488  |
| C | 4.24912  | -1.26533 | -0.59166 |
| C | 4.27291  | -2.33965 | 0.51975  |
| H | 4.75788  | -3.25120 | 0.10271  |
| H | 3.25207  | -2.63211 | 0.84485  |
| H | 4.86577  | -2.03733 | 1.40663  |
| C | 5.70014  | -0.89175 | -0.96792 |
| H | 6.25740  | -0.41082 | -0.13890 |
| H | 5.75516  | -0.23371 | -1.85888 |
| H | 6.24217  | -1.83045 | -1.22782 |
| C | 3.54962  | -1.90237 | -1.81646 |
| H | 3.52309  | -1.24345 | -2.70398 |
| H | 2.51424  | -2.22230 | -1.58087 |
| H | 4.12235  | -2.81397 | -2.10330 |
| H | 4.87273  | 3.00578  | 0.01153  |
| H | 5.67307  | 1.82944  | -1.08981 |
| C | 3.34851  | 1.30520  | -2.64941 |
| H | 3.32997  | 2.20382  | -3.30708 |
| H | 4.21675  | 0.69297  | -2.96681 |
| H | 2.41329  | 0.73603  | -2.84064 |
| C | 2.99808  | -0.23974 | 2.81333  |

Vibrational Spectrum (first 50 lines):

| # | mode | symmetry | wave number | IR intensity | selection rules |
|---|------|----------|-------------|--------------|-----------------|
| # |      | cm**(-1) | km/mol      | IR           | RAMAN           |
| 1 |      | 0.00     | 0.00000     | -            | -               |
| 2 |      | 0.00     | 0.00000     | -            | -               |
| 3 |      | 0.00     | 0.00000     | -            | -               |
| 4 |      | 0.00     | 0.00000     | -            | -               |
| 5 |      | 0.00     | 0.00000     | -            | -               |
| 6 |      | 0.00     | 0.00000     | -            | -               |
| 7 | a    | 6.38     | 0.12370     | YES          | YES             |
| 8 | a    | 11.83    | 0.19303     | YES          | YES             |

|    |   |        |          |     |     |
|----|---|--------|----------|-----|-----|
| 9  | a | 14.04  | 4.06532  | YES | YES |
| 10 | a | 18.22  | 2.00489  | YES | YES |
| 11 | a | 30.74  | 21.14088 | YES | YES |
| 12 | a | 35.83  | 1.16523  | YES | YES |
| 13 | a | 39.43  | 0.14943  | YES | YES |
| 14 | a | 46.18  | 18.11460 | YES | YES |
| 15 | a | 46.90  | 6.32022  | YES | YES |
| 16 | a | 49.27  | 3.27949  | YES | YES |
| 17 | a | 58.15  | 9.66417  | YES | YES |
| 18 | a | 61.59  | 0.07761  | YES | YES |
| 19 | a | 66.02  | 34.74150 | YES | YES |
| 20 | a | 68.13  | 9.47966  | YES | YES |
| 21 | a | 76.06  | 0.81299  | YES | YES |
| 22 | a | 93.10  | 3.08027  | YES | YES |
| 23 | a | 93.84  | 0.55625  | YES | YES |
| 24 | a | 95.67  | 0.84851  | YES | YES |
| 25 | a | 117.16 | 0.48202  | YES | YES |
| 26 | a | 121.40 | 1.19394  | YES | YES |
| 27 | a | 125.19 | 0.39740  | YES | YES |
| 28 | a | 183.48 | 0.23327  | YES | YES |
| 29 | a | 184.41 | 0.83914  | YES | YES |
| 30 | a | 192.05 | 0.66939  | YES | YES |
| 31 | a | 192.49 | 0.40431  | YES | YES |
| 32 | a | 196.09 | 0.00841  | YES | YES |
| 33 | a | 197.49 | 2.10276  | YES | YES |
| 34 | a | 199.12 | 1.04248  | YES | YES |
| 35 | a | 205.00 | 0.07508  | YES | YES |
| 36 | a | 213.29 | 7.38431  | YES | YES |
| 37 | a | 215.35 | 16.13645 | YES | YES |
| 38 | a | 235.66 | 4.52405  | YES | YES |
| 39 | a | 237.53 | 1.09086  | YES | YES |
| 40 | a | 245.17 | 0.22004  | YES | YES |
| 41 | a | 249.16 | 0.38469  | YES | YES |
| 42 | a | 253.97 | 1.13750  | YES | YES |
| 43 | a | 255.95 | 0.13185  | YES | YES |
| 44 | a | 257.14 | 0.35606  | YES | YES |
| 45 | a | 257.76 | 0.99793  | YES | YES |
| 46 | a | 263.22 | 0.10720  | YES | YES |
| 47 | a | 269.62 | 1.03222  | YES | YES |
| 48 | a | 286.67 | 0.31186  | YES | YES |
| 49 | a | 292.12 | 0.94970  | YES | YES |
| 50 | a | 302.84 | 0.35265  | YES | YES |

**[PhSe(PPh3).PtBu3]+\_iso1**

bp86 energy (au): -4482.9984762200

pbe0\_def2-tzvpp\_sp energy (au): -4482.464473821

Zero point energy (au): 0.7146757

Entropy (kJ mol<sup>-1</sup>): 1.10507

Chemical potential (kJ mol<sup>-1</sup>): 1665.84

XYZ coordinates:

86

|    |          |          |          |
|----|----------|----------|----------|
| P  | -2.11637 | 0.33002  | 0.02126  |
| Se | 0.50930  | 0.08214  | 0.00169  |
| C  | 0.31188  | -1.85897 | 0.00085  |
| C  | -0.00456 | -2.52113 | -1.20450 |
| H  | -0.10448 | -1.94939 | -2.14045 |
| C  | -0.20409 | -3.91308 | -1.20558 |
| H  | -0.45503 | -4.42547 | -2.14879 |
| C  | -0.07939 | -4.64739 | -0.01279 |
| H  | -0.22871 | -5.73939 | -0.01894 |
| C  | 0.22975  | -3.98531 | 1.18826  |
| H  | 0.31804  | -4.55433 | 2.12827  |
| C  | 0.41700  | -2.59146 | 1.20019  |
| H  | 0.63759  | -2.07388 | 2.14598  |
| C  | -3.09368 | -0.57026 | 1.28298  |
| C  | -3.11797 | -1.98534 | 1.23493  |
| H  | -2.58222 | -2.52572 | 0.43727  |
| C  | -3.83666 | -2.70845 | 2.19902  |
| H  | -3.85875 | -3.80921 | 2.14907  |
| C  | -4.52025 | -2.03393 | 3.22670  |
| H  | -5.08001 | -2.60537 | 3.98492  |
| C  | -4.48847 | -0.63032 | 3.28471  |
| H  | -5.02655 | -0.09656 | 4.08496  |
| C  | -3.78079 | 0.10324  | 2.31776  |
| H  | -3.77182 | 1.20347  | 2.36653  |
| C  | -2.33088 | 2.12412  | 0.33860  |
| C  | -3.17511 | 2.92949  | -0.45740 |
| H  | -3.73942 | 2.48407  | -1.29220 |
| C  | -3.29999 | 4.30203  | -0.18427 |
| H  | -3.96244 | 4.92289  | -0.80915 |
| C  | -2.58882 | 4.88012  | 0.88121  |
| H  | -2.69099 | 5.95696  | 1.09285  |
| C  | -1.74627 | 4.08330  | 1.67679  |
| H  | -1.18865 | 4.53343  | 2.51434  |
| C  | -1.60958 | 2.71241  | 1.40531  |
| H  | -0.94243 | 2.09537  | 2.03094  |
| C  | -2.88899 | -0.01140 | -1.60788 |
| C  | -4.18354 | -0.56546 | -1.72599 |
| H  | -4.76097 | -0.82414 | -0.82416 |
| C  | -4.73927 | -0.78575 | -2.99788 |
| H  | -5.74982 | -1.21764 | -3.08183 |
| C  | -4.01559 | -0.45168 | -4.15540 |
| H  | -4.45575 | -0.62534 | -5.15072 |

|   |          |          |          |
|---|----------|----------|----------|
| C | -2.72682 | 0.10099  | -4.04237 |
| H | -2.15600 | 0.36248  | -4.94837 |
| C | -2.16061 | 0.31482  | -2.77591 |
| H | -1.14524 | 0.73739  | -2.69118 |
| P | 3.20034  | 0.26237  | -0.00763 |
| C | 3.47561  | 1.83988  | -1.12788 |
| C | 4.83447  | 2.53456  | -0.88807 |
| H | 4.93301  | 3.37298  | -1.61560 |
| C | 2.33062  | 2.85273  | -0.87130 |
| H | 2.49128  | 3.73023  | -1.53857 |
| H | 2.29386  | 3.23571  | 0.16536  |
| H | 1.33695  | 2.42785  | -1.12868 |
| C | 3.70422  | 0.65459  | 1.83896  |
| C | 5.23037  | 0.65260  | 2.07872  |
| H | 5.42200  | 0.94406  | 3.13729  |
| H | 5.77062  | 1.37683  | 1.43601  |
| H | 5.68505  | -0.34919 | 1.93558  |
| H | 3.38210  | -1.42644 | 2.59254  |
| H | 1.92639  | -0.36869 | 2.64915  |
| H | 3.26943  | -0.13014 | 3.81836  |
| C | 3.12892  | 2.02853  | 2.25490  |
| H | 2.03447  | 2.09973  | 2.07294  |
| H | 3.63382  | 2.88129  | 1.75715  |
| H | 3.29077  | 2.15244  | 3.34994  |
| C | 4.23085  | -1.24882 | -0.69646 |
| C | 4.25056  | -2.37668 | 0.36076  |
| H | 4.71678  | -3.27450 | -0.10481 |
| H | 3.22863  | -2.66847 | 0.68507  |
| H | 4.85794  | -2.12621 | 1.25392  |
| C | 5.68393  | -0.88118 | -1.07148 |
| H | 6.25614  | -0.44987 | -0.22514 |
| H | 5.74070  | -0.17910 | -1.92823 |
| H | 6.20933  | -1.81319 | -1.38431 |
| C | 3.50430  | -1.81488 | -1.93965 |
| H | 3.48413  | -1.11661 | -2.79720 |
| H | 2.46373  | -2.11876 | -1.70533 |
| H | 4.04963  | -2.72675 | -2.27465 |
| H | 4.91505  | 2.97838  | 0.12537  |
| H | 5.69933  | 1.85937  | -1.04515 |
| C | 3.37022  | 1.43508  | -2.61650 |
| H | 3.36510  | 2.36602  | -3.22751 |
| H | 4.22865  | 0.82616  | -2.96506 |
| H | 2.42662  | 0.89075  | -2.83709 |
| C | 3.03169  | -0.39069 | 2.76182  |

Vibrational Spectrum (first 50 lines):

| # | mode | symmetry | wave number<br>cm**(-1) | IR intensity<br>km/mol | IR  | selection rules<br>RAMAN |
|---|------|----------|-------------------------|------------------------|-----|--------------------------|
| 1 |      |          | 0.00                    | 0.00000                | -   | -                        |
| 2 |      |          | 0.00                    | 0.00000                | -   | -                        |
| 3 |      |          | 0.00                    | 0.00000                | -   | -                        |
| 4 |      |          | 0.00                    | 0.00000                | -   | -                        |
| 5 |      |          | 0.00                    | 0.00000                | -   | -                        |
| 6 |      |          | 0.00                    | 0.00000                | -   | -                        |
| 7 | a    |          | 10.97                   | 1.60285                | YES | YES                      |
| 8 | a    |          | 14.65                   | 1.70208                | YES | YES                      |

|    |   |        |          |     |     |
|----|---|--------|----------|-----|-----|
| 9  | a | 16.16  | 0.69938  | YES | YES |
| 10 | a | 22.87  | 1.23102  | YES | YES |
| 11 | a | 32.69  | 27.28928 | YES | YES |
| 12 | a | 38.68  | 1.60387  | YES | YES |
| 13 | a | 41.27  | 9.80152  | YES | YES |
| 14 | a | 45.82  | 7.19138  | YES | YES |
| 15 | a | 46.77  | 6.95772  | YES | YES |
| 16 | a | 51.60  | 1.05305  | YES | YES |
| 17 | a | 58.35  | 11.70294 | YES | YES |
| 18 | a | 60.69  | 28.84364 | YES | YES |
| 19 | a | 62.66  | 0.02234  | YES | YES |
| 20 | a | 69.58  | 2.35076  | YES | YES |
| 21 | a | 75.62  | 0.16108  | YES | YES |
| 22 | a | 91.07  | 0.11138  | YES | YES |
| 23 | a | 96.59  | 4.12222  | YES | YES |
| 24 | a | 98.34  | 12.30386 | YES | YES |
| 25 | a | 115.09 | 0.31138  | YES | YES |
| 26 | a | 118.44 | 0.81277  | YES | YES |
| 27 | a | 125.20 | 0.23306  | YES | YES |
| 28 | a | 180.33 | 0.09707  | YES | YES |
| 29 | a | 185.14 | 1.19264  | YES | YES |
| 30 | a | 189.04 | 0.28600  | YES | YES |
| 31 | a | 193.84 | 1.20323  | YES | YES |
| 32 | a | 194.88 | 1.16101  | YES | YES |
| 33 | a | 201.38 | 2.14212  | YES | YES |
| 34 | a | 205.84 | 0.44655  | YES | YES |
| 35 | a | 206.43 | 0.33737  | YES | YES |
| 36 | a | 213.37 | 19.45904 | YES | YES |
| 37 | a | 216.53 | 1.31963  | YES | YES |
| 38 | a | 236.49 | 5.31347  | YES | YES |
| 39 | a | 237.21 | 0.39190  | YES | YES |
| 40 | a | 246.37 | 0.77188  | YES | YES |
| 41 | a | 246.80 | 0.05835  | YES | YES |
| 42 | a | 254.16 | 0.29515  | YES | YES |
| 43 | a | 254.70 | 0.79620  | YES | YES |
| 44 | a | 256.39 | 0.23530  | YES | YES |
| 45 | a | 261.24 | 0.48869  | YES | YES |
| 46 | a | 263.28 | 0.29899  | YES | YES |
| 47 | a | 268.64 | 0.54321  | YES | YES |
| 48 | a | 284.59 | 0.30234  | YES | YES |
| 49 | a | 291.01 | 1.09071  | YES | YES |
| 50 | a | 301.93 | 0.56323  | YES | YES |



**[PhSe(PPh<sub>3</sub>).PtBu<sub>3</sub>]+/encounter/startpoint/iso2**

bp86 energy (au): -4482.9966782020

Single point data not present for this isomer

Zero point energy (au): 0.7140836

Entropy (kJ mol<sup>-1</sup>): 1.08308

Chemical potential (kJ mol<sup>-1</sup>): 1669.28

XYZ coordinates:

86

|    |          |          |          |
|----|----------|----------|----------|
| P  | -1.67235 | 0.39576  | 0.00446  |
| Se | 0.87674  | 0.11343  | 0.10374  |
| C  | 0.66585  | -1.82264 | 0.03093  |
| C  | 0.66298  | -2.49718 | -1.20693 |
| H  | 0.77496  | -1.93557 | -2.14730 |
| C  | 0.50226  | -3.89379 | -1.24172 |
| H  | 0.50187  | -4.41704 | -2.21203 |
| C  | 0.34341  | -4.61795 | -0.04675 |
| H  | 0.22456  | -5.71320 | -0.07830 |
| C  | 0.32962  | -3.94201 | 1.18558  |
| H  | 0.19466  | -4.50294 | 2.12434  |
| C  | 0.48502  | -2.54551 | 1.22846  |
| H  | 0.45833  | -2.01536 | 2.19355  |
| C  | -2.65814 | -0.52774 | 1.23932  |
| C  | -2.80883 | -1.92750 | 1.08496  |
| H  | -2.38334 | -2.44139 | 0.20815  |
| C  | -3.51475 | -2.66754 | 2.04542  |
| H  | -3.63356 | -3.75517 | 1.91305  |
| C  | -4.06197 | -2.02809 | 3.17202  |
| H  | -4.61061 | -2.61432 | 3.92706  |
| C  | -3.90977 | -0.64011 | 3.33153  |
| H  | -4.34614 | -0.13206 | 4.20687  |
| C  | -3.21190 | 0.11154  | 2.37184  |
| H  | -3.11097 | 1.20076  | 2.50142  |
| C  | -1.90959 | 2.18503  | 0.32376  |
| C  | -2.78760 | 2.96368  | -0.46311 |
| H  | -3.34550 | 2.50289  | -1.29386 |
| C  | -2.95301 | 4.33056  | -0.18565 |
| H  | -3.64182 | 4.93033  | -0.80243 |
| C  | -2.24739 | 4.92973  | 0.87211  |
| H  | -2.38040 | 6.00268  | 1.08604  |
| C  | -1.36924 | 4.16029  | 1.65558  |
| H  | -0.81369 | 4.62785  | 2.48483  |
| C  | -1.19384 | 2.79364  | 1.38229  |
| H  | -0.50252 | 2.19559  | 1.99960  |
| C  | -2.39326 | 0.04672  | -1.64415 |
| C  | -3.71935 | -0.42044 | -1.79216 |
| H  | -4.34251 | -0.61676 | -0.90520 |
| C  | -4.24840 | -0.63174 | -3.07631 |
| H  | -5.28310 | -0.99548 | -3.18467 |
| C  | -3.46608 | -0.37644 | -4.21574 |
| H  | -3.88536 | -0.54455 | -5.22108 |

|   |          |          |          |
|---|----------|----------|----------|
| C | -2.14792 | 0.09235  | -4.07195 |
| H | -1.53213 | 0.29429  | -4.96335 |
| C | -1.60825 | 0.29897  | -2.79256 |
| H | -0.57179 | 0.65961  | -2.68172 |
| P | 3.68727  | 0.22619  | 0.15855  |
| C | 3.92367  | 2.16391  | 0.29113  |
| C | 5.35018  | 2.59721  | 0.69693  |
| H | 5.40486  | 3.70991  | 0.66161  |
| C | 2.91098  | 2.72080  | 1.32387  |
| H | 3.04985  | 3.82466  | 1.38652  |
| H | 3.04219  | 2.31478  | 2.34436  |
| H | 1.85955  | 2.54213  | 1.01339  |
| C | 4.53335  | -0.64896 | 1.68751  |
| C | 6.07519  | -0.70542 | 1.61338  |
| H | 6.45586  | -1.15290 | 2.56068  |
| H | 6.54717  | 0.29208  | 1.51063  |
| H | 6.43659  | -1.35205 | 0.78721  |
| H | 4.26744  | -2.74631 | 0.95942  |
| H | 2.87303  | -2.10150 | 1.87841  |
| H | 4.38789  | -2.54617 | 2.73091  |
| C | 4.10839  | 0.08208  | 2.98174  |
| H | 3.00351  | 0.17355  | 3.06614  |
| H | 4.56486  | 1.08677  | 3.08717  |
| H | 4.45529  | -0.52188 | 3.85096  |
| C | 4.47715  | -0.41789 | -1.50742 |
| C | 4.57739  | -1.96021 | -1.45680 |
| H | 4.87172  | -2.32137 | -2.46850 |
| H | 3.60748  | -2.43954 | -1.20267 |
| H | 5.35233  | -2.32009 | -0.75058 |
| C | 5.87567  | 0.16574  | -1.80692 |
| H | 6.61079  | -0.04171 | -1.00264 |
| H | 5.85413  | 1.25982  | -1.98806 |
| H | 6.26440  | -0.30683 | -2.73860 |
| C | 3.51476  | -0.07431 | -2.67123 |
| H | 3.43277  | 1.01036  | -2.87200 |
| H | 2.49278  | -0.46835 | -2.48866 |
| H | 3.90341  | -0.55072 | -3.60032 |
| H | 5.61088  | 2.29652  | 1.73221  |
| H | 6.13148  | 2.20885  | 0.01273  |
| C | 3.56650  | 2.82498  | -1.06107 |
| H | 3.53346  | 3.92800  | -0.90874 |
| H | 4.31807  | 2.63302  | -1.85310 |
| H | 2.56615  | 2.51478  | -1.43196 |
| C | 3.97859  | -2.08899 | 1.80061  |

Vibrational Spectrum (first 50 lines):

| # | mode | symmetry | wave number | IR intensity | selection rules |
|---|------|----------|-------------|--------------|-----------------|
| # |      | cm**(-1) | km/mol      | IR           | RAMAN           |
| 1 | a    | -16.37   | 0.00000     | YES          | YES             |
| 2 |      | 0.00     | 0.00000     | -            | -               |
| 3 |      | 0.00     | 0.00000     | -            | -               |
| 4 |      | 0.00     | 0.00000     | -            | -               |
| 5 |      | 0.00     | 0.00000     | -            | -               |
| 6 |      | 0.00     | 0.00000     | -            | -               |
| 7 |      | 0.00     | 0.00000     | -            | -               |
| 8 | a    | 12.25    | 0.96407     | YES          | YES             |

|    |   |        |          |     |     |
|----|---|--------|----------|-----|-----|
| 9  | a | 19.41  | 2.89243  | YES | YES |
| 10 | a | 21.79  | 3.12238  | YES | YES |
| 11 | a | 30.03  | 45.88806 | YES | YES |
| 12 | a | 37.23  | 24.43158 | YES | YES |
| 13 | a | 39.99  | 1.39072  | YES | YES |
| 14 | a | 43.43  | 0.08621  | YES | YES |
| 15 | a | 48.14  | 3.21850  | YES | YES |
| 16 | a | 49.17  | 0.33289  | YES | YES |
| 17 | a | 53.89  | 0.18971  | YES | YES |
| 18 | a | 56.16  | 0.48403  | YES | YES |
| 19 | a | 64.85  | 0.42876  | YES | YES |
| 20 | a | 69.35  | 0.03564  | YES | YES |
| 21 | a | 80.88  | 0.00558  | YES | YES |
| 22 | a | 86.46  | 0.07013  | YES | YES |
| 23 | a | 96.89  | 0.87965  | YES | YES |
| 24 | a | 100.03 | 1.11725  | YES | YES |
| 25 | a | 105.05 | 28.62702 | YES | YES |
| 26 | a | 106.80 | 3.32494  | YES | YES |
| 27 | a | 115.14 | 0.84237  | YES | YES |
| 28 | a | 167.79 | 0.27405  | YES | YES |
| 29 | a | 169.80 | 0.66654  | YES | YES |
| 30 | a | 174.16 | 0.02304  | YES | YES |
| 31 | a | 187.49 | 0.92407  | YES | YES |
| 32 | a | 193.66 | 1.68665  | YES | YES |
| 33 | a | 195.48 | 1.06590  | YES | YES |
| 34 | a | 200.25 | 0.26725  | YES | YES |
| 35 | a | 200.76 | 3.25027  | YES | YES |
| 36 | a | 206.45 | 2.59515  | YES | YES |
| 37 | a | 215.99 | 16.06259 | YES | YES |
| 38 | a | 229.98 | 0.28722  | YES | YES |
| 39 | a | 235.42 | 0.35956  | YES | YES |
| 40 | a | 238.93 | 2.00022  | YES | YES |
| 41 | a | 239.06 | 0.20566  | YES | YES |
| 42 | a | 244.21 | 0.66268  | YES | YES |
| 43 | a | 252.37 | 0.12922  | YES | YES |
| 44 | a | 252.83 | 0.51476  | YES | YES |
| 45 | a | 256.01 | 0.58339  | YES | YES |
| 46 | a | 264.75 | 0.49370  | YES | YES |
| 47 | a | 268.79 | 0.78949  | YES | YES |
| 48 | a | 277.16 | 0.08545  | YES | YES |
| 49 | a | 281.76 | 0.08019  | YES | YES |
| 50 | a | 295.18 | 0.50994  | YES | YES |

**[PhSe(PtBu3)]+**

bp86 energy (au): -3447.2492755360

pbe0\_def2-tzvpp\_sp energy (au): -3446.869744332

Zero point energy (au): 0.4477377

Entropy (kJ mol<sup>-1</sup>): 0.69468

Chemical potential (kJ mol<sup>-1</sup>): 1038.54

XYZ coordinates:

52

|   |          |          |          |
|---|----------|----------|----------|
| P | 1.14783  | 0.12796  | -0.13267 |
| C | -4.92953 | 0.41993  | -0.36710 |
| H | -5.96270 | 0.69572  | -0.63307 |
| C | 1.69819  | 1.59794  | 1.03081  |
| C | -2.85557 | 0.91140  | 0.81935  |
| H | -2.28332 | 1.55949  | 1.49875  |
| C | 2.34679  | 1.03257  | 2.31485  |
| H | 2.52119  | 1.88760  | 3.00589  |
| H | 3.33171  | 0.55542  | 2.14007  |
| H | 1.67944  | 0.32048  | 2.84613  |
| C | -4.16997 | 1.26104  | 0.46544  |
| H | -4.60731 | 2.19255  | 0.85998  |
| C | 2.14755  | -2.29648 | -1.30925 |
| H | 2.85104  | -3.15439 | -1.21844 |
| H | 2.28646  | -1.87423 | -2.32474 |
| H | 1.11921  | -2.70520 | -1.21641 |
| C | -2.29597 | -0.27982 | 0.31457  |
| C | 2.48675  | -1.29697 | -0.18042 |
| C | -3.05872 | -1.13528 | -0.50979 |
| H | -2.63338 | -2.08366 | -0.87461 |
| C | -0.21380 | 2.02046  | -1.80426 |
| H | -0.55899 | 2.27875  | -2.83065 |
| H | 0.35501  | 2.89450  | -1.42852 |
| H | -1.12185 | 1.87610  | -1.18243 |
| C | 3.89781  | -0.71063 | -0.41674 |
| H | 4.60457  | -1.56413 | -0.52608 |
| H | 4.26134  | -0.10145 | 0.43544  |
| H | 3.97207  | -0.10730 | -1.34358 |
| C | -0.21375 | -0.33627 | -2.62391 |
| H | -1.16603 | -0.52975 | -2.09251 |
| H | 0.31191  | -1.29638 | -2.77840 |
| H | -0.47359 | 0.06098  | -3.63092 |
| C | 0.45163  | 2.39220  | 1.47965  |
| H | 0.80051  | 3.23717  | 2.11494  |
| H | -0.21751 | 1.76419  | 2.10443  |
| H | -0.13336 | 2.82745  | 0.64746  |
| C | 2.69503  | 2.53643  | 0.31306  |
| H | 2.23110  | 3.09878  | -0.52260 |
| H | 3.59644  | 2.01363  | -0.06601 |
| H | 3.04418  | 3.29134  | 1.05318  |
| C | 0.64143  | 0.73738  | -1.91426 |
| C | 2.46881  | -2.09334 | 1.14849  |

|    |          |          |          |
|----|----------|----------|----------|
| H  | 1.51024  | -2.63302 | 1.30299  |
| H  | 2.68820  | -1.48597 | 2.04563  |
| H  | 3.26230  | -2.87151 | 1.07832  |
| C  | 1.90622  | 1.02996  | -2.75446 |
| H  | 1.56934  | 1.45785  | -3.72582 |
| H  | 2.48581  | 0.11500  | -2.99170 |
| H  | 2.58462  | 1.77332  | -2.29021 |
| C  | -4.37656 | -0.78007 | -0.84588 |
| H  | -4.97384 | -1.45227 | -1.48316 |
| Se | -0.58514 | -0.96608 | 0.94179  |

Vibrational Spectrum (first 50 lines):

| #  | mode | symmetry | wave number | IR intensity | selection rules |
|----|------|----------|-------------|--------------|-----------------|
| #  |      | cm**(-1) | km/mol      | IR           | RAMAN           |
| 1  |      | 0.00     | 0.00000     | -            | -               |
| 2  |      | 0.00     | 0.00000     | -            | -               |
| 3  |      | 0.00     | 0.00000     | -            | -               |
| 4  |      | 0.00     | 0.00000     | -            | -               |
| 5  |      | 0.00     | 0.00000     | -            | -               |
| 6  |      | 0.00     | 0.00000     | -            | -               |
| 7  | a    | 32.21    | 0.22020     | YES          | YES             |
| 8  | a    | 52.40    | 0.17604     | YES          | YES             |
| 9  | a    | 61.50    | 0.30432     | YES          | YES             |
| 10 | a    | 85.23    | 0.18602     | YES          | YES             |
| 11 | a    | 94.63    | 0.40405     | YES          | YES             |
| 12 | a    | 115.31   | 0.21672     | YES          | YES             |
| 13 | a    | 119.24   | 0.27832     | YES          | YES             |
| 14 | a    | 125.40   | 0.04203     | YES          | YES             |
| 15 | a    | 151.54   | 0.61807     | YES          | YES             |
| 16 | a    | 162.93   | 0.09100     | YES          | YES             |
| 17 | a    | 190.39   | 1.10708     | YES          | YES             |
| 18 | a    | 193.98   | 0.76177     | YES          | YES             |
| 19 | a    | 197.41   | 0.96171     | YES          | YES             |
| 20 | a    | 203.73   | 0.30836     | YES          | YES             |
| 21 | a    | 207.57   | 0.34786     | YES          | YES             |
| 22 | a    | 224.74   | 0.10045     | YES          | YES             |
| 23 | a    | 231.54   | 0.29662     | YES          | YES             |
| 24 | a    | 241.44   | 0.50420     | YES          | YES             |
| 25 | a    | 246.79   | 0.32396     | YES          | YES             |
| 26 | a    | 251.42   | 0.20979     | YES          | YES             |
| 27 | a    | 254.72   | 0.33246     | YES          | YES             |
| 28 | a    | 259.32   | 0.09970     | YES          | YES             |
| 29 | a    | 275.71   | 0.13487     | YES          | YES             |
| 30 | a    | 280.63   | 0.06955     | YES          | YES             |
| 31 | a    | 288.96   | 0.65132     | YES          | YES             |
| 32 | a    | 297.33   | 0.09969     | YES          | YES             |
| 33 | a    | 303.46   | 1.77696     | YES          | YES             |
| 34 | a    | 328.19   | 0.46993     | YES          | YES             |
| 35 | a    | 346.56   | 0.58521     | YES          | YES             |
| 36 | a    | 351.83   | 0.52483     | YES          | YES             |
| 37 | a    | 365.80   | 1.17446     | YES          | YES             |
| 38 | a    | 373.62   | 0.16197     | YES          | YES             |
| 39 | a    | 377.29   | 0.21705     | YES          | YES             |
| 40 | a    | 401.03   | 0.33137     | YES          | YES             |
| 41 | a    | 403.27   | 0.57173     | YES          | YES             |
| 42 | a    | 405.35   | 0.41960     | YES          | YES             |

|    |   |        |          |     |     |
|----|---|--------|----------|-----|-----|
| 43 | a | 408.78 | 0.59008  | YES | YES |
| 44 | a | 456.27 | 11.11421 | YES | YES |
| 45 | a | 458.27 | 9.21389  | YES | YES |
| 46 | a | 470.98 | 6.98247  | YES | YES |
| 47 | a | 491.63 | 26.96240 | YES | YES |
| 48 | a | 527.82 | 8.04084  | YES | YES |
| 49 | a | 555.16 | 2.74144  | YES | YES |
| 50 | a | 560.51 | 0.62071  | YES | YES |

**[PhS(PPh3)]+**

bp86 energy (au): -1665.1390434500

pbe0\_def2-tzvpp\_sp energy (au): -1664.919057810

Zero point energy (au): 0.3581954

Entropy (kJ mol<sup>-1</sup>): 0.70216

Chemical potential (kJ mol<sup>-1</sup>): 794.43

XYZ coordinates:

46

|   |            |            |            |
|---|------------|------------|------------|
| P | 0.1392601  | 0.5738565  | 0.0229572  |
| S | 1.9998524  | -0.4661656 | 0.1192764  |
| C | 1.5122026  | -2.1986323 | 0.0403477  |
| C | 1.3740572  | -2.8383642 | -1.2095328 |
| H | 1.4995025  | -2.2678853 | -2.1429921 |
| C | 1.0896681  | -4.2131663 | -1.2493444 |
| H | 0.9847487  | -4.7194194 | -2.2226429 |
| C | 0.9579510  | -4.9435621 | -0.0541676 |
| H | 0.7468035  | -6.0245024 | -0.0921786 |
| C | 1.1084022  | -4.3017150 | 1.1878265  |
| H | 1.0172282  | -4.8761983 | 2.1238145  |
| C | 1.3845171  | -2.9256015 | 1.2426657  |
| H | 1.5120968  | -2.4177425 | 2.2113933  |
| C | -1.0868459 | -0.1132557 | 1.1694660  |
| C | -1.7057354 | -1.3514225 | 0.8688980  |
| H | -1.4707073 | -1.8885104 | -0.0639941 |
| C | -2.6372027 | -1.8942893 | 1.7665236  |
| H | -3.1224892 | -2.8550133 | 1.5308385  |
| C | -2.9504891 | -1.2165263 | 2.9582254  |
| H | -3.6856000 | -1.6465640 | 3.6577494  |
| C | -2.3326430 | 0.0102901  | 3.2577132  |
| H | -2.5827997 | 0.5449385  | 4.1881257  |
| C | -1.3987585 | 0.5660317  | 2.3698360  |
| H | -0.9252809 | 1.5319025  | 2.6071682  |
| C | 0.6124288  | 2.2649011  | 0.4904251  |
| C | 0.0878664  | 3.3622081  | -0.2302914 |
| H | -0.5840188 | 3.2001969  | -1.0879969 |
| C | 0.4339906  | 4.6684470  | 0.1496243  |
| H | 0.0272166  | 5.5240052  | -0.4128629 |
| C | 1.2997866  | 4.8831575  | 1.2361757  |
| H | 1.5725095  | 5.9106899  | 1.5264249  |
| C | 1.8255993  | 3.7909125  | 1.9495732  |
| H | 2.5100397  | 3.9592501  | 2.7964122  |
| C | 1.4862871  | 2.4794966  | 1.5835510  |
| H | 1.9090372  | 1.6278958  | 2.1408524  |
| C | -0.5300351 | 0.5594357  | -1.6679514 |
| C | -1.9273993 | 0.5983333  | -1.8832573 |
| H | -2.6289354 | 0.5716603  | -1.0343880 |
| C | -2.4228379 | 0.6741562  | -3.1954041 |
| H | -3.5112972 | 0.7018233  | -3.3648228 |
| C | -1.5359728 | 0.7128846  | -4.2853459 |
| H | -1.9307889 | 0.7695246  | -5.3127020 |

|   |            |           |            |
|---|------------|-----------|------------|
| C | -0.1459232 | 0.6789043 | -4.0694075 |
| H | 0.5487075  | 0.7100765 | -4.9240947 |
| C | 0.3624527  | 0.6020163 | -2.7642572 |
| H | 1.4513400  | 0.5709817 | -2.5948388 |

Vibrational Spectrum (first 50 lines):

| #  | mode | symmetry | wave number | IR intensity | selection rules |
|----|------|----------|-------------|--------------|-----------------|
| #  |      | cm**(-1) | km/mol      | IR           | RAMAN           |
| 1  |      | 0.00     | 0.00000     | -            | -               |
| 2  |      | 0.00     | 0.00000     | -            | -               |
| 3  |      | 0.00     | 0.00000     | -            | -               |
| 4  |      | 0.00     | 0.00000     | -            | -               |
| 5  |      | 0.00     | 0.00000     | -            | -               |
| 6  |      | 0.00     | 0.00000     | -            | -               |
| 7  | a    | 20.28    | 0.08755     | YES          | YES             |
| 8  | a    | 27.88    | 0.00810     | YES          | YES             |
| 9  | a    | 33.36    | 0.06606     | YES          | YES             |
| 10 | a    | 39.18    | 0.02010     | YES          | YES             |
| 11 | a    | 46.49    | 0.16347     | YES          | YES             |
| 12 | a    | 50.36    | 0.04573     | YES          | YES             |
| 13 | a    | 56.93    | 0.11035     | YES          | YES             |
| 14 | a    | 60.70    | 0.08646     | YES          | YES             |
| 15 | a    | 73.63    | 0.31691     | YES          | YES             |
| 16 | a    | 100.93   | 0.58271     | YES          | YES             |
| 17 | a    | 116.98   | 0.89837     | YES          | YES             |
| 18 | a    | 185.48   | 1.14471     | YES          | YES             |
| 19 | a    | 189.86   | 2.10379     | YES          | YES             |
| 20 | a    | 209.53   | 1.36231     | YES          | YES             |
| 21 | a    | 214.52   | 0.35815     | YES          | YES             |
| 22 | a    | 240.02   | 0.58162     | YES          | YES             |
| 23 | a    | 256.66   | 0.39745     | YES          | YES             |
| 24 | a    | 266.34   | 0.44498     | YES          | YES             |
| 25 | a    | 283.07   | 1.65099     | YES          | YES             |
| 26 | a    | 314.34   | 3.15946     | YES          | YES             |
| 27 | a    | 393.19   | 0.23918     | YES          | YES             |
| 28 | a    | 394.55   | 0.12588     | YES          | YES             |
| 29 | a    | 400.61   | 6.47780     | YES          | YES             |
| 30 | a    | 401.29   | 0.13196     | YES          | YES             |
| 31 | a    | 403.78   | 1.63041     | YES          | YES             |
| 32 | a    | 436.16   | 5.14157     | YES          | YES             |
| 33 | a    | 440.37   | 6.23189     | YES          | YES             |
| 34 | a    | 449.15   | 7.00389     | YES          | YES             |
| 35 | a    | 481.29   | 15.44570    | YES          | YES             |
| 36 | a    | 497.61   | 57.90493    | YES          | YES             |
| 37 | a    | 513.58   | 76.15323    | YES          | YES             |
| 38 | a    | 544.98   | 63.67789    | YES          | YES             |
| 39 | a    | 604.29   | 0.01925     | YES          | YES             |
| 40 | a    | 605.35   | 0.32121     | YES          | YES             |
| 41 | a    | 605.55   | 0.26694     | YES          | YES             |
| 42 | a    | 606.65   | 0.50988     | YES          | YES             |
| 43 | a    | 677.64   | 7.52248     | YES          | YES             |
| 44 | a    | 686.14   | 2.36627     | YES          | YES             |
| 45 | a    | 692.21   | 39.29860    | YES          | YES             |
| 46 | a    | 693.05   | 18.36036    | YES          | YES             |
| 47 | a    | 694.01   | 35.33904    | YES          | YES             |
| 48 | a    | 694.73   | 7.98434     | YES          | YES             |



|    |   |        |          |     |     |
|----|---|--------|----------|-----|-----|
| 49 | a | 711.00 | 26.27979 | YES | YES |
| 50 | a | 711.64 | 30.90159 | YES | YES |

**[PhS(PPh3).PPh3]+**

bp86 energy (au): -2700.8834663460

pbe0\_def2-tzvpp\_sp energy (au): -2700.510707785

Zero point energy (au): 0.6248255

Entropy (kJ mol<sup>-1</sup>): 1.12127

Chemical potential (kJ mol<sup>-1</sup>): 1418.79

XYZ coordinates:

80

|   |          |          |          |
|---|----------|----------|----------|
| C | -4.75761 | 0.43244  | 3.37906  |
| H | -5.84038 | 0.54000  | 3.55572  |
| C | 2.64634  | 2.63161  | 4.05460  |
| H | 3.73317  | 2.77248  | 3.93354  |
| S | -0.08435 | 0.01129  | -0.38243 |
| P | -0.17857 | 0.02624  | 2.56367  |
| C | 0.52566  | 3.31000  | 5.03323  |
| H | -0.05650 | 3.98309  | 5.68385  |
| C | -4.12168 | 1.21724  | 2.40066  |
| H | -4.70407 | 1.94174  | 1.80793  |
| C | -1.98124 | 0.15674  | 2.93192  |
| C | 1.99916  | 1.59060  | 3.37048  |
| H | 2.58373  | 0.92601  | 2.71193  |
| C | 1.15307  | -3.98704 | 4.54539  |
| H | 1.46303  | -4.94486 | 4.99445  |
| C | 0.60700  | 1.38796  | 3.52687  |
| C | 3.82246  | 1.25677  | -0.31495 |
| H | 4.37087  | 2.20810  | -0.41187 |
| C | -2.74369 | 1.07431  | 2.17142  |
| H | -2.25181 | 1.68677  | 1.39636  |
| C | 0.35790  | -1.52958 | 3.39794  |
| C | 0.43745  | -3.97460 | 3.33434  |
| H | 0.18348  | -4.92303 | 2.83251  |
| C | -0.12532 | 2.26038  | 4.36216  |
| H | -1.21011 | 2.11904  | 4.49278  |
| C | 1.91029  | 3.49672  | 4.88440  |
| H | 2.41809  | 4.31837  | 5.41543  |
| C | -2.62804 | -0.62837 | 3.91257  |
| H | -2.04867 | -1.34945 | 4.51130  |
| C | 1.07667  | -1.55050 | 4.61303  |
| H | 1.32628  | -0.60610 | 5.12253  |
| C | 0.05008  | -2.75427 | 2.75895  |
| H | -0.50480 | -2.75137 | 1.80490  |
| C | 2.41560  | -1.17006 | -0.05854 |
| H | 1.85976  | -2.11459 | 0.04579  |
| C | -4.00927 | -0.48972 | 4.13113  |
| H | -4.50366 | -1.10547 | 4.90043  |
| C | 1.47204  | -2.77470 | 5.18005  |
| H | 2.03026  | -2.77876 | 6.13082  |
| C | 3.81513  | -1.15140 | 0.05460  |
| H | 4.35697  | -2.09144 | 0.24894  |
| C | 2.42096  | 1.25178  | -0.41410 |

|   |          |          |          |
|---|----------|----------|----------|
| H | 1.87195  | 2.19225  | -0.57613 |
| C | 4.52011  | 0.05833  | -0.07886 |
| H | 5.61883  | 0.06845  | 0.00786  |
| C | 1.71969  | 0.03409  | -0.29389 |
| C | -4.78110 | -0.85107 | -3.20425 |
| H | -5.85474 | -1.05442 | -3.34810 |
| C | 2.86455  | -2.20108 | -4.13235 |
| H | 3.96064  | -2.10500 | -4.19133 |
| P | -0.26241 | -0.01184 | -2.60313 |
| C | 0.82607  | -3.45199 | -4.59487 |
| H | 0.32094  | -4.33368 | -5.02123 |
| C | -4.06355 | -1.53987 | -2.21048 |
| H | -4.57200 | -2.28051 | -1.57245 |
| C | -2.04224 | -0.32909 | -2.83610 |
| C | 2.11491  | -1.18984 | -3.51271 |
| H | 2.62808  | -0.31049 | -3.09146 |
| C | 0.62282  | 4.14116  | -4.46387 |
| H | 0.81580  | 5.13347  | -4.90286 |
| C | 0.70509  | -1.30686 | -3.44092 |
| C | -2.69602 | -1.28377 | -2.02158 |
| H | -2.14077 | -1.82170 | -1.23634 |
| C | 0.13866  | 1.60823  | -3.33958 |
| C | 0.00682  | 4.03859  | -3.20285 |
| H | -0.28420 | 4.94833  | -2.65325 |
| C | 0.06377  | -2.44607 | -3.98023 |
| H | -1.03241 | -2.54323 | -3.93306 |
| C | 2.22426  | -3.33110 | -4.67211 |
| H | 2.81925  | -4.12214 | -5.15675 |
| C | -2.76617 | 0.36493  | -3.83213 |
| H | -2.26510 | 1.11439  | -4.46519 |
| C | 0.75162  | 1.71181  | -4.60911 |
| H | 1.03950  | 0.80681  | -5.16739 |
| C | -0.23487 | 2.77786  | -2.63723 |
| H | -0.70917 | 2.69928  | -1.64521 |
| C | -4.13260 | 0.09864  | -4.01306 |
| H | -4.69438 | 0.64092  | -4.79043 |
| C | 0.99293  | 2.98014  | -5.16387 |
| H | 1.47258  | 3.05777  | -6.15294 |

Vibrational Spectrum (first 50 lines):

| #  | mode | symmetry | wave number | IR intensity | selection rules |
|----|------|----------|-------------|--------------|-----------------|
| #  |      | cm**(-1) | km/mol      | IR           | RAMAN           |
| 1  |      | 0.00     | 0.00000     | -            | -               |
| 2  |      | 0.00     | 0.00000     | -            | -               |
| 3  |      | 0.00     | 0.00000     | -            | -               |
| 4  |      | 0.00     | 0.00000     | -            | -               |
| 5  |      | 0.00     | 0.00000     | -            | -               |
| 6  |      | 0.00     | 0.00000     | -            | -               |
| 7  | a    | 8.91     | 0.00853     | YES          | YES             |
| 8  | a    | 10.28    | 0.01662     | YES          | YES             |
| 9  | a    | 15.04    | 0.01446     | YES          | YES             |
| 10 | a    | 20.06    | 0.15562     | YES          | YES             |
| 11 | a    | 24.87    | 0.36964     | YES          | YES             |
| 12 | a    | 27.04    | 4.13689     | YES          | YES             |
| 13 | a    | 29.56    | 4.39775     | YES          | YES             |
| 14 | a    | 32.92    | 0.12713     | YES          | YES             |

|    |   |        |           |     |     |
|----|---|--------|-----------|-----|-----|
| 15 | a | 33.45  | 0.10094   | YES | YES |
| 16 | a | 41.29  | 0.05059   | YES | YES |
| 17 | a | 42.52  | 0.14980   | YES | YES |
| 18 | a | 43.32  | 0.05403   | YES | YES |
| 19 | a | 49.55  | 0.07086   | YES | YES |
| 20 | a | 51.61  | 1.86015   | YES | YES |
| 21 | a | 54.69  | 0.10829   | YES | YES |
| 22 | a | 55.99  | 0.10047   | YES | YES |
| 23 | a | 57.73  | 0.03562   | YES | YES |
| 24 | a | 62.29  | 1.01023   | YES | YES |
| 25 | a | 63.04  | 3.15374   | YES | YES |
| 26 | a | 73.04  | 1.18964   | YES | YES |
| 27 | a | 81.16  | 33.88866  | YES | YES |
| 28 | a | 109.52 | 0.08470   | YES | YES |
| 29 | a | 133.81 | 1.34940   | YES | YES |
| 30 | a | 169.92 | 63.77951  | YES | YES |
| 31 | a | 181.91 | 0.16209   | YES | YES |
| 32 | a | 188.47 | 0.87705   | YES | YES |
| 33 | a | 191.05 | 1.00501   | YES | YES |
| 34 | a | 196.49 | 1.18372   | YES | YES |
| 35 | a | 205.49 | 1.77216   | YES | YES |
| 36 | a | 210.49 | 4.64363   | YES | YES |
| 37 | a | 235.90 | 12.08249  | YES | YES |
| 38 | a | 239.24 | 0.62946   | YES | YES |
| 39 | a | 249.15 | 102.80359 | YES | YES |
| 40 | a | 253.79 | 2.38221   | YES | YES |
| 41 | a | 256.90 | 20.01326  | YES | YES |
| 42 | a | 258.14 | 0.54766   | YES | YES |
| 43 | a | 266.53 | 7.46505   | YES | YES |
| 44 | a | 296.65 | 12.50641  | YES | YES |
| 45 | a | 391.18 | 2.85725   | YES | YES |
| 46 | a | 394.64 | 0.42482   | YES | YES |
| 47 | a | 394.94 | 0.09809   | YES | YES |
| 48 | a | 395.47 | 0.77244   | YES | YES |
| 49 | a | 395.94 | 0.14994   | YES | YES |
| 50 | a | 400.74 | 1.89072   | YES | YES |

**[PhS(PtBu3).PPh3]+**

bp86 energy (au): -2479.5540780740

pbe0\_def2-tzvpp\_sp energy (au): -2479.255866431

Zero point energy (au): 0.7151331

Entropy (kJ mol<sup>-1</sup>): 1.11704

Chemical potential (kJ mol<sup>-1</sup>): 1663.07

XYZ coordinates:

86

|   |          |          |          |
|---|----------|----------|----------|
| P | -2.09958 | 0.19799  | 0.05376  |
| S | 1.05840  | -0.10995 | 0.18665  |
| C | 0.78936  | -1.89806 | 0.17717  |
| C | 0.72098  | -2.63099 | -1.02497 |
| H | 0.89077  | -2.13557 | -1.99245 |
| C | 0.39866  | -3.99887 | -0.99055 |
| H | 0.34699  | -4.56799 | -1.93293 |
| C | 0.12641  | -4.63315 | 0.23396  |
| H | -0.12788 | -5.70523 | 0.25519  |
| C | 0.15985  | -3.89245 | 1.42890  |
| H | -0.07721 | -4.37744 | 2.38972  |
| C | 0.48605  | -2.52692 | 1.40423  |
| H | 0.48960  | -1.94054 | 2.33650  |
| C | -3.41360 | -0.69117 | 1.00480  |
| C | -3.35975 | -2.10511 | 1.02076  |
| H | -2.56168 | -2.63078 | 0.46887  |
| C | -4.31851 | -2.84696 | 1.72881  |
| H | -4.27098 | -3.94856 | 1.72517  |
| C | -5.33127 | -2.18707 | 2.44787  |
| H | -6.07963 | -2.76906 | 3.01040  |
| C | -5.38431 | -0.78286 | 2.44781  |
| H | -6.17709 | -0.25970 | 3.00769  |
| C | -4.43423 | -0.03648 | 1.72888  |
| H | -4.49198 | 1.06382  | 1.72965  |
| C | -2.35608 | 1.97474  | 0.50390  |
| C | -2.96751 | 2.91957  | -0.34869 |
| H | -3.35172 | 2.60542  | -1.33246 |
| C | -3.09788 | 4.26088  | 0.05376  |
| H | -3.58097 | 4.98692  | -0.62098 |
| C | -2.62820 | 4.67387  | 1.31196  |
| H | -2.73935 | 5.72431  | 1.62730  |
| C | -2.01887 | 3.73961  | 2.16940  |
| H | -1.65343 | 4.05494  | 3.16095  |
| C | -1.87320 | 2.40310  | 1.76391  |
| H | -1.39252 | 1.67648  | 2.44224  |
| C | -2.68084 | 0.09703  | -1.70070 |
| C | -3.96202 | -0.36744 | -2.07089 |
| H | -4.68197 | -0.67319 | -1.29483 |
| C | -4.32690 | -0.43990 | -3.42670 |
| H | -5.33088 | -0.80339 | -3.70149 |
| C | -3.42284 | -0.04548 | -4.42760 |
| H | -3.71372 | -0.10087 | -5.48944 |

|   |          |          |          |
|---|----------|----------|----------|
| C | -2.14445 | 0.41863  | -4.06898 |
| H | -1.43070 | 0.72954  | -4.85003 |
| C | -1.77280 | 0.47898  | -2.71630 |
| H | -0.76468 | 0.83465  | -2.44065 |
| P | 3.23039  | 0.29128  | 0.07703  |
| C | 3.92556  | -0.15174 | -1.69559 |
| C | 5.19878  | 0.66074  | -2.02749 |
| H | 5.58205  | 0.30395  | -3.01055 |
| C | 2.84428  | 0.13362  | -2.76360 |
| H | 3.22702  | -0.23713 | -3.74090 |
| H | 2.62151  | 1.20962  | -2.88647 |
| H | 1.89059  | -0.38897 | -2.54982 |
| C | 3.11873  | 2.23039  | 0.33179  |
| C | 4.50728  | 2.82710  | 0.65894  |
| H | 4.40255  | 3.93546  | 0.67769  |
| H | 5.28200  | 2.58661  | -0.09656 |
| H | 4.87856  | 2.52417  | 1.65910  |
| H | 2.40618  | 2.12892  | 2.45200  |
| H | 1.08828  | 2.30056  | 1.24252  |
| H | 2.16068  | 3.68370  | 1.60658  |
| C | 2.56663  | 2.89879  | -0.94964 |
| H | 1.59155  | 2.47302  | -1.26635 |
| H | 3.27562  | 2.86500  | -1.80088 |
| H | 2.39307  | 3.97335  | -0.71703 |
| C | 4.25686  | -0.56511 | 1.50018  |
| C | 3.81138  | 0.01711  | 2.86023  |
| H | 4.29335  | -0.58655 | 3.66179  |
| H | 2.71280  | -0.05367 | 3.00724  |
| H | 4.13085  | 1.06769  | 3.01169  |
| C | 5.77520  | -0.34534 | 1.30725  |
| H | 6.06588  | 0.72158  | 1.23913  |
| H | 6.17393  | -0.88060 | 0.42134  |
| H | 6.29300  | -0.76944 | 2.19761  |
| C | 3.96870  | -2.08420 | 1.53641  |
| H | 4.25984  | -2.61790 | 0.61341  |
| H | 2.90510  | -2.30782 | 1.74633  |
| H | 4.57104  | -2.51579 | 2.36760  |
| H | 5.00163  | 1.74645  | -2.13560 |
| H | 6.01432  | 0.51907  | -1.29011 |
| C | 4.26205  | -1.66019 | -1.75618 |
| H | 4.52209  | -1.90680 | -2.81012 |
| H | 5.14166  | -1.93121 | -1.13833 |
| H | 3.40489  | -2.30423 | -1.46826 |
| C | 2.13598  | 2.57804  | 1.47854  |

Vibrational Spectrum (first 50 lines):

| # | mode | symmetry | wave number | IR intensity | selection rules |
|---|------|----------|-------------|--------------|-----------------|
| # |      | cm**(-1) | km/mol      | IR           | RAMAN           |
| 1 |      | 0.00     | 0.00000     | -            | -               |
| 2 |      | 0.00     | 0.00000     | -            | -               |
| 3 |      | 0.00     | 0.00000     | -            | -               |
| 4 |      | 0.00     | 0.00000     | -            | -               |
| 5 |      | 0.00     | 0.00000     | -            | -               |
| 6 |      | 0.00     | 0.00000     | -            | -               |
| 7 | a    | 5.34     | 0.00269     | YES          | YES             |
| 8 | a    | 10.86    | 0.03648     | YES          | YES             |

|    |   |        |          |     |     |
|----|---|--------|----------|-----|-----|
| 9  | a | 13.44  | 0.03608  | YES | YES |
| 10 | a | 17.67  | 0.12527  | YES | YES |
| 11 | a | 28.40  | 5.66079  | YES | YES |
| 12 | a | 30.54  | 1.19580  | YES | YES |
| 13 | a | 36.17  | 0.54334  | YES | YES |
| 14 | a | 38.10  | 0.51034  | YES | YES |
| 15 | a | 42.28  | 0.08852  | YES | YES |
| 16 | a | 51.65  | 2.06433  | YES | YES |
| 17 | a | 56.48  | 0.20839  | YES | YES |
| 18 | a | 57.39  | 2.62142  | YES | YES |
| 19 | a | 59.42  | 0.28183  | YES | YES |
| 20 | a | 68.77  | 0.81859  | YES | YES |
| 21 | a | 73.81  | 9.26106  | YES | YES |
| 22 | a | 95.26  | 0.30151  | YES | YES |
| 23 | a | 95.96  | 0.53606  | YES | YES |
| 24 | a | 115.97 | 0.21843  | YES | YES |
| 25 | a | 129.96 | 0.97131  | YES | YES |
| 26 | a | 135.16 | 0.64665  | YES | YES |
| 27 | a | 152.62 | 13.62361 | YES | YES |
| 28 | a | 164.70 | 10.26302 | YES | YES |
| 29 | a | 180.14 | 3.71531  | YES | YES |
| 30 | a | 182.05 | 0.10245  | YES | YES |
| 31 | a | 192.51 | 0.24626  | YES | YES |
| 32 | a | 193.60 | 1.13422  | YES | YES |
| 33 | a | 194.70 | 1.41420  | YES | YES |
| 34 | a | 201.16 | 1.09892  | YES | YES |
| 35 | a | 205.81 | 0.46852  | YES | YES |
| 36 | a | 212.00 | 0.23867  | YES | YES |
| 37 | a | 236.94 | 5.34937  | YES | YES |
| 38 | a | 239.02 | 1.20228  | YES | YES |
| 39 | a | 242.43 | 1.86718  | YES | YES |
| 40 | a | 244.51 | 2.60839  | YES | YES |
| 41 | a | 250.76 | 8.94675  | YES | YES |
| 42 | a | 254.27 | 0.45098  | YES | YES |
| 43 | a | 256.54 | 0.64234  | YES | YES |
| 44 | a | 257.06 | 0.79187  | YES | YES |
| 45 | a | 263.01 | 10.99157 | YES | YES |
| 46 | a | 275.23 | 16.05915 | YES | YES |
| 47 | a | 283.66 | 6.50935  | YES | YES |
| 48 | a | 283.87 | 1.74967  | YES | YES |
| 49 | a | 291.61 | 20.61850 | YES | YES |
| 50 | a | 302.11 | 1.36833  | YES | YES |

## [PhS(PPh3).PtBu3]+\_try4

Optimisation data present for this isomer

pbe0\_def2-tzvpp\_sp energy (au): -2479.255024102

XYZ coordinates:

86

|   |          |          |          |
|---|----------|----------|----------|
| P | -2.06849 | 0.34547  | 0.03073  |
| S | 0.15760  | 0.05451  | -0.00059 |
| C | 0.11557  | -1.74962 | -0.05539 |
| C | -0.04878 | -2.41859 | -1.28611 |
| H | -0.15535 | -1.84123 | -2.21769 |
| C | -0.06673 | -3.82360 | -1.31697 |
| H | -0.19492 | -4.34594 | -2.27913 |
| C | 0.09266  | -4.55953 | -0.12899 |
| H | 0.08776  | -5.66126 | -0.15875 |
| C | 0.26388  | -3.88946 | 1.09549  |
| H | 0.39105  | -4.46337 | 2.02785  |
| C | 0.26970  | -2.48495 | 1.13811  |
| H | 0.39336  | -1.95529 | 2.09554  |
| C | -2.97530 | -0.63438 | 1.26939  |
| C | -3.12592 | -2.02966 | 1.07543  |
| H | -2.72587 | -2.51639 | 0.17161  |
| C | -3.79685 | -2.79845 | 2.03795  |
| H | -3.91697 | -3.88228 | 1.87951  |
| C | -4.31015 | -2.19190 | 3.19847  |
| H | -4.83527 | -2.80096 | 3.95208  |
| C | -4.15606 | -0.80886 | 3.39588  |
| H | -4.56310 | -0.32933 | 4.30071  |
| C | -3.49092 | -0.02717 | 2.43796  |
| H | -3.38614 | 1.05767  | 2.59642  |
| C | -2.21037 | 2.11837  | 0.43237  |
| C | -3.08950 | 2.95257  | -0.29406 |
| H | -3.69067 | 2.54264  | -1.12113 |
| C | -3.19612 | 4.31248  | 0.03925  |
| H | -3.88299 | 4.95935  | -0.52999 |
| C | -2.43079 | 4.84553  | 1.09071  |
| H | -2.51642 | 5.91389  | 1.34736  |
| C | -1.55401 | 4.01773  | 1.81414  |
| H | -0.95184 | 4.43464  | 2.63754  |
| C | -1.43734 | 2.65712  | 1.48850  |
| H | -0.74462 | 2.01526  | 2.05668  |
| C | -2.81521 | 0.06432  | -1.61037 |
| C | -4.12237 | -0.45706 | -1.74557 |
| H | -4.70647 | -0.74071 | -0.85585 |
| C | -4.68259 | -0.60926 | -3.02497 |
| H | -5.70151 | -1.01651 | -3.12661 |
| C | -3.95073 | -0.24185 | -4.16714 |
| H | -4.39483 | -0.36384 | -5.16842 |
| C | -2.65161 | 0.28171  | -4.03360 |
| H | -2.07698 | 0.57171  | -4.92810 |
| C | -2.07992 | 0.43260  | -2.76134 |
| H | -1.05882 | 0.83565  | -2.65894 |
| P | 3.19525  | 0.21531  | -0.03032 |
| C | 3.61148  | 1.37048  | -1.55481 |



|   |         |          |          |
|---|---------|----------|----------|
| C | 4.92204 | 2.17759  | -1.43894 |
| H | 5.07667 | 2.75671  | -2.37963 |
| C | 2.42160 | 2.34567  | -1.74684 |
| H | 2.59452 | 2.93990  | -2.67376 |
| H | 2.30003 | 3.06814  | -0.91704 |
| H | 1.46295 | 1.79642  | -1.86884 |
| C | 3.54681 | 1.19571  | 1.62531  |
| C | 5.03413 | 1.33989  | 2.01321  |
| H | 5.10897 | 1.95369  | 2.94113  |
| H | 5.63185 | 1.85117  | 1.23109  |
| H | 5.51539 | 0.36485  | 2.23361  |
| H | 3.16875 | -0.54718 | 2.97400  |
| H | 1.69823 | 0.38210  | 2.52437  |
| H | 2.88097 | 1.06022  | 3.69903  |
| C | 2.92353 | 2.60777  | 1.52798  |
| H | 1.85400 | 2.57618  | 1.22627  |
| H | 3.46837 | 3.27651  | 0.83171  |
| H | 2.97085 | 3.08253  | 2.53528  |
| C | 4.35700 | -1.36150 | -0.09158 |
| C | 4.29506 | -2.09392 | 1.26912  |
| H | 4.81813 | -3.07218 | 1.16367  |
| H | 3.24997 | -2.31231 | 1.57798  |
| H | 4.80471 | -1.54448 | 2.08634  |
| C | 5.83415 | -1.08082 | -0.44048 |
| H | 6.31721 | -0.37621 | 0.26687  |
| H | 5.96218 | -0.68209 | -1.46785 |
| H | 6.40320 | -2.03846 | -0.39424 |
| C | 3.75520 | -2.34099 | -1.13035 |
| H | 3.79772 | -1.96460 | -2.17013 |
| H | 2.69825 | -2.58734 | -0.89495 |
| H | 4.33766 | -3.29061 | -1.10215 |
| H | 4.89664 | 2.91535  | -0.61004 |
| H | 5.81238 | 1.53189  | -1.29881 |
| C | 3.66484 | 0.51000  | -2.83859 |
| H | 3.71562 | 1.19208  | -3.71858 |
| H | 4.55894 | -0.14420 | -2.88871 |
| H | 2.75596 | -0.11922 | -2.95980 |
| C | 2.78157 | 0.46750  | 2.76008  |

**[PhS(PtBu3)]+**

bp86 energy (au): -1443.8122964960

pbe0\_def2-tzvpp\_sp energy (au): -1443.664047188

Zero point energy (au): 0.4487512

Entropy (kJ mol<sup>-1</sup>): 0.68386

Chemical potential (kJ mol<sup>-1</sup>): 1043.31

XYZ coordinates:

52

|   |          |          |          |
|---|----------|----------|----------|
| P | -1.00074 | 0.02552  | 0.00057  |
| C | 2.24653  | -0.65845 | 0.09607  |
| C | 4.34329  | -0.10279 | 1.20499  |
| H | 4.92752  | 0.01764  | 2.13154  |
| C | 4.94126  | 0.12975  | -0.04581 |
| H | 5.99713  | 0.43935  | -0.10314 |
| C | 4.19716  | -0.05141 | -1.22492 |
| H | 4.66956  | 0.10645  | -2.20802 |
| C | 2.85355  | -0.45757 | -1.16115 |
| H | 2.29464  | -0.63841 | -2.09151 |
| C | -0.84565 | 1.50267  | 1.26156  |
| C | -1.90786 | 2.58681  | 0.96499  |
| H | -1.83709 | 3.35396  | 1.76943  |
| C | 0.56479  | 2.13317  | 1.18301  |
| H | 0.59214  | 2.96886  | 1.91836  |
| H | 0.81138  | 2.56232  | 0.19493  |
| H | 1.36318  | 1.41996  | 1.46395  |
| C | -1.07527 | 0.62602  | -1.85472 |
| C | -2.49110 | 1.14077  | -2.20668 |
| H | -2.45420 | 1.54433  | -3.24370 |
| H | -2.83635 | 1.96477  | -1.54983 |
| H | -3.25585 | 0.33762  | -2.20316 |
| H | -1.43479 | -1.36741 | -2.79471 |
| H | 0.29495  | -0.96986 | -2.56547 |
| H | -0.66578 | -0.13649 | -3.83406 |
| C | -0.05299 | 1.76499  | -2.07514 |
| H | 0.97963  | 1.48157  | -1.78311 |
| H | -0.33183 | 2.70301  | -1.55463 |
| H | -0.03645 | 1.99439  | -3.16396 |
| C | -2.47933 | -1.18430 | 0.44281  |
| C | -2.73228 | -2.16237 | -0.72870 |
| H | -3.49103 | -2.90038 | -0.38529 |
| H | -1.82441 | -2.73625 | -1.01079 |
| H | -3.15037 | -1.66938 | -1.62883 |
| C | -3.76531 | -0.37117 | 0.72045  |
| H | -4.05462 | 0.29711  | -0.11540 |
| H | -3.70387 | 0.22582  | 1.65312  |
| H | -4.59753 | -1.09731 | 0.86015  |
| C | -2.13644 | -2.04265 | 1.68649  |
| H | -1.90941 | -1.45197 | 2.59304  |
| H | -1.29560 | -2.74152 | 1.50141  |
| H | -3.03409 | -2.66112 | 1.91196  |

|   |          |          |          |
|---|----------|----------|----------|
| S | 0.60305  | -1.38783 | 0.26236  |
| C | 2.99782  | -0.49759 | 1.28175  |
| H | 2.53346  | -0.69757 | 2.26058  |
| H | -1.72633 | 3.11334  | 0.00596  |
| H | -2.94761 | 2.20386  | 0.97148  |
| C | -1.02988 | 0.96457  | 2.69802  |
| H | -0.80012 | 1.79663  | 3.40087  |
| H | -2.06665 | 0.63769  | 2.91509  |
| H | -0.32939 | 0.13457  | 2.92878  |
| C | -0.70050 | -0.54038 | -2.79760 |

Vibrational Spectrum (first 50 lines):

| #  | mode | symmetry | wave number | IR intensity | selection rules |
|----|------|----------|-------------|--------------|-----------------|
| #  |      | cm**(-1) | km/mol      | IR           | RAMAN           |
| 1  |      | 0.00     | 0.00000     | -            | -               |
| 2  |      | 0.00     | 0.00000     | -            | -               |
| 3  |      | 0.00     | 0.00000     | -            | -               |
| 4  |      | 0.00     | 0.00000     | -            | -               |
| 5  |      | 0.00     | 0.00000     | -            | -               |
| 6  |      | 0.00     | 0.00000     | -            | -               |
| 7  | a    | 27.79    | 0.15426     | YES          | YES             |
| 8  | a    | 55.95    | 0.07687     | YES          | YES             |
| 9  | a    | 59.61    | 0.08344     | YES          | YES             |
| 10 | a    | 86.75    | 0.52811     | YES          | YES             |
| 11 | a    | 97.96    | 0.16022     | YES          | YES             |
| 12 | a    | 119.34   | 0.14072     | YES          | YES             |
| 13 | a    | 128.92   | 0.81837     | YES          | YES             |
| 14 | a    | 129.70   | 0.14458     | YES          | YES             |
| 15 | a    | 163.98   | 0.09934     | YES          | YES             |
| 16 | a    | 176.39   | 0.99974     | YES          | YES             |
| 17 | a    | 187.85   | 0.01568     | YES          | YES             |
| 18 | a    | 195.08   | 0.22831     | YES          | YES             |
| 19 | a    | 201.42   | 1.45397     | YES          | YES             |
| 20 | a    | 209.04   | 0.62751     | YES          | YES             |
| 21 | a    | 209.83   | 0.82123     | YES          | YES             |
| 22 | a    | 233.37   | 0.56312     | YES          | YES             |
| 23 | a    | 241.09   | 1.03914     | YES          | YES             |
| 24 | a    | 249.00   | 0.29624     | YES          | YES             |
| 25 | a    | 256.64   | 0.18184     | YES          | YES             |
| 26 | a    | 257.58   | 0.25279     | YES          | YES             |
| 27 | a    | 265.09   | 0.22925     | YES          | YES             |
| 28 | a    | 273.35   | 0.72106     | YES          | YES             |
| 29 | a    | 285.61   | 0.39240     | YES          | YES             |
| 30 | a    | 292.17   | 0.24219     | YES          | YES             |
| 31 | a    | 302.91   | 0.03741     | YES          | YES             |
| 32 | a    | 315.95   | 0.30287     | YES          | YES             |
| 33 | a    | 326.81   | 0.35369     | YES          | YES             |
| 34 | a    | 339.00   | 0.37775     | YES          | YES             |
| 35 | a    | 345.56   | 0.66223     | YES          | YES             |
| 36 | a    | 366.21   | 1.47850     | YES          | YES             |
| 37 | a    | 375.90   | 0.33479     | YES          | YES             |
| 38 | a    | 382.23   | 0.47435     | YES          | YES             |
| 39 | a    | 397.32   | 0.57857     | YES          | YES             |
| 40 | a    | 402.36   | 1.97378     | YES          | YES             |
| 41 | a    | 405.55   | 1.20592     | YES          | YES             |
| 42 | a    | 410.26   | 0.03896     | YES          | YES             |

|    |   |        |          |     |     |
|----|---|--------|----------|-----|-----|
| 43 | a | 416.64 | 3.40347  | YES | YES |
| 44 | a | 458.38 | 12.46442 | YES | YES |
| 45 | a | 461.23 | 9.34973  | YES | YES |
| 46 | a | 487.78 | 7.95595  | YES | YES |
| 47 | a | 508.03 | 11.69427 | YES | YES |
| 48 | a | 537.86 | 12.99659 | YES | YES |
| 49 | a | 561.63 | 3.73592  | YES | YES |
| 50 | a | 568.51 | 7.13609  | YES | YES |

## TS [PhS(PPh3)2]<sup>+</sup>

bp86 energy (au): -2700.8820576920

Zero point energy (au): 0.6242501

Entropy (kJ mol<sup>-1</sup>): 1.09592

Chemical potential (kJ mol<sup>-1</sup>): 1423.72

XYZ coordinates:

80

|   |          |          |          |
|---|----------|----------|----------|
| C | -4.77608 | 0.45972  | 2.92641  |
| H | -5.86081 | 0.57141  | 3.08749  |
| C | 2.70508  | 2.53078  | 3.68856  |
| H | 3.80464  | 2.59122  | 3.64238  |
| S | -0.11555 | -0.00057 | -0.29467 |
| P | -0.20447 | 0.02213  | 2.21292  |
| C | 0.57052  | 3.42299  | 4.44474  |
| H | -0.00774 | 4.18132  | 4.99710  |
| C | -4.12350 | 1.24877  | 1.96267  |
| H | -4.69401 | 1.97892  | 1.36595  |
| C | -2.00258 | 0.17251  | 2.51723  |
| C | 2.04143  | 1.47848  | 3.03979  |
| H | 2.62597  | 0.72418  | 2.48810  |
| C | 1.11278  | -4.04370 | 4.04408  |
| H | 1.41563  | -5.01544 | 4.46691  |
| C | 0.62945  | 1.38560  | 3.10293  |
| C | 3.74088  | 1.37494  | -0.52375 |
| H | 4.24467  | 2.34343  | -0.67677 |
| C | -2.74273 | 1.10476  | 1.75229  |
| H | -2.23718 | 1.72063  | 0.99019  |
| C | 0.33984  | -1.55705 | 2.96365  |
| C | 0.37974  | -3.99589 | 2.84417  |
| H | 0.10633  | -4.92921 | 2.32533  |
| C | -0.10320 | 2.36918  | 3.80551  |
| H | -1.20143 | 2.30788  | 3.86310  |
| C | 1.97231  | 3.50576  | 4.38936  |
| H | 2.49683  | 4.33283  | 4.89491  |
| C | -2.66326 | -0.61989 | 3.48297  |
| H | -2.09702 | -1.35116 | 4.08152  |
| C | 1.07473  | -1.60939 | 4.16905  |
| H | 1.34399  | -0.68094 | 4.69715  |
| C | -0.00022 | -2.75977 | 2.29975  |
| H | -0.56512 | -2.72612 | 1.35330  |
| C | 2.44757  | -1.09738 | -0.14079 |
| H | 1.93813  | -2.06370 | -0.00311 |
| C | -4.04555 | -0.47321 | 3.68333  |
| H | -4.55498 | -1.09198 | 4.43982  |
| C | 1.45879  | -2.85153 | 4.70249  |
| H | 2.02970  | -2.88495 | 5.64475  |
| C | 3.85140  | -1.02880 | -0.14581 |
| H | 4.44170  | -1.94879 | -0.00414 |
| C | 2.33671  | 1.31877  | -0.50216 |
| H | 1.74166  | 2.23606  | -0.63100 |
| C | 4.49922  | 0.20433  | -0.34105 |
| H | 5.60049  | 0.25365  | -0.35109 |

|   |          |          |          |
|---|----------|----------|----------|
| C | 1.68839  | 0.07949  | -0.31427 |
| C | -4.77223 | -0.91739 | -3.44810 |
| H | -5.84313 | -1.13299 | -3.59531 |
| C | 2.85478  | -2.27094 | -4.32405 |
| H | 3.95553  | -2.21747 | -4.31141 |
| P | -0.25296 | -0.04467 | -2.80069 |
| C | 0.80223  | -3.39423 | -4.99499 |
| H | 0.28942  | -4.22040 | -5.51403 |
| C | -4.04171 | -1.61795 | -2.47210 |
| H | -4.53797 | -2.38179 | -1.85165 |
| C | -2.03369 | -0.36600 | -3.07499 |
| C | 2.10561  | -1.27815 | -3.67476 |
| H | 2.62494  | -0.45557 | -3.15644 |
| C | 0.62787  | 4.10616  | -4.70302 |
| H | 0.82465  | 5.09705  | -5.14360 |
| C | 0.69030  | -1.33209 | -3.69493 |
| C | -2.67822 | -1.34289 | -2.27983 |
| H | -2.11182 | -1.89039 | -1.50857 |
| C | 0.12619  | 1.57067  | -3.57678 |
| C | -0.03326 | 4.00500  | -3.46527 |
| H | -0.35571 | 4.91556  | -2.93432 |
| C | 0.04259  | -2.40085 | -4.35515 |
| H | -1.05738 | -2.45315 | -4.37965 |
| C | 2.20606  | -3.33120 | -4.98257 |
| H | 2.79803  | -4.11098 | -5.48890 |
| C | -2.77315 | 0.33823  | -4.05197 |
| H | -2.28169 | 1.10399  | -4.67326 |
| C | 0.78975  | 1.67649  | -4.81984 |
| H | 1.10879  | 0.77011  | -5.35877 |
| C | -0.27887 | 2.74491  | -2.89886 |
| H | -0.78868 | 2.66990  | -1.92388 |
| C | -4.13744 | 0.05978  | -4.23489 |
| H | -4.70750 | 0.61014  | -5.00094 |
| C | 1.03809  | 2.94290  | -5.37630 |
| H | 1.55344  | 3.01769  | -6.34770 |

Vibrational Spectrum (first 50 lines):

| #  | mode | symmetry | wave number | IR intensity | selection rules |
|----|------|----------|-------------|--------------|-----------------|
| #  |      | cm**(-1) | km/mol      | IR           | RAMAN           |
| 1  | a    | -81.48   | 0.00000     | YES          | YES             |
| 2  |      | 0.00     | 0.00000     | -            | -               |
| 3  |      | 0.00     | 0.00000     | -            | -               |
| 4  |      | 0.00     | 0.00000     | -            | -               |
| 5  |      | 0.00     | 0.00000     | -            | -               |
| 6  |      | 0.00     | 0.00000     | -            | -               |
| 7  |      | 0.00     | 0.00000     | -            | -               |
| 8  | a    | 8.57     | 0.00206     | YES          | YES             |
| 9  | a    | 12.82    | 0.02413     | YES          | YES             |
| 10 | a    | 17.54    | 0.30214     | YES          | YES             |
| 11 | a    | 20.00    | 0.52866     | YES          | YES             |
| 12 | a    | 25.24    | 0.37270     | YES          | YES             |
| 13 | a    | 27.13    | 0.24745     | YES          | YES             |
| 14 | a    | 34.46    | 0.00784     | YES          | YES             |
| 15 | a    | 37.02    | 0.04849     | YES          | YES             |
| 16 | a    | 38.97    | 0.02294     | YES          | YES             |
| 17 | a    | 41.74    | 1.34928     | YES          | YES             |

|    |   |        |          |     |     |
|----|---|--------|----------|-----|-----|
| 18 | a | 44.75  | 1.60566  | YES | YES |
| 19 | a | 48.82  | 1.45984  | YES | YES |
| 20 | a | 50.92  | 1.22854  | YES | YES |
| 21 | a | 55.87  | 0.06533  | YES | YES |
| 22 | a | 57.14  | 0.00195  | YES | YES |
| 23 | a | 61.79  | 2.42033  | YES | YES |
| 24 | a | 64.01  | 12.81610 | YES | YES |
| 25 | a | 69.70  | 0.34500  | YES | YES |
| 26 | a | 72.59  | 2.45440  | YES | YES |
| 27 | a | 74.12  | 0.00748  | YES | YES |
| 28 | a | 108.51 | 0.00468  | YES | YES |
| 29 | a | 115.27 | 0.03504  | YES | YES |
| 30 | a | 139.96 | 1.05682  | YES | YES |
| 31 | a | 183.87 | 0.78001  | YES | YES |
| 32 | a | 184.17 | 1.81765  | YES | YES |
| 33 | a | 191.82 | 0.42239  | YES | YES |
| 34 | a | 196.41 | 2.94729  | YES | YES |
| 35 | a | 202.99 | 1.18335  | YES | YES |
| 36 | a | 203.21 | 2.11338  | YES | YES |
| 37 | a | 229.30 | 69.27300 | YES | YES |
| 38 | a | 236.86 | 0.30194  | YES | YES |
| 39 | a | 237.41 | 0.17634  | YES | YES |
| 40 | a | 254.09 | 1.15717  | YES | YES |
| 41 | a | 255.21 | 2.76479  | YES | YES |
| 42 | a | 261.58 | 0.71999  | YES | YES |
| 43 | a | 262.00 | 0.22846  | YES | YES |
| 44 | a | 298.89 | 4.61042  | YES | YES |
| 45 | a | 390.39 | 0.60369  | YES | YES |
| 46 | a | 392.65 | 2.94670  | YES | YES |
| 47 | a | 394.33 | 0.58181  | YES | YES |
| 48 | a | 394.71 | 0.31279  | YES | YES |
| 49 | a | 395.88 | 0.10135  | YES | YES |
| 50 | a | 396.17 | 0.03548  | YES | YES |

## TS [PhS(PPh<sub>3</sub>)(PtBu<sub>3</sub>)]<sup>+</sup>

bp86 energy (au): -2479.5529924680

pbe0\_def2-tzvpp\_sp energy (au): -2479.247034127

Zero point energy (au): 0.7153819

Entropy (kJ mol<sup>-1</sup>): 1.03957

Chemical potential (kJ mol<sup>-1</sup>): 1681.89

XYZ coordinates:

86

|   |          |          |          |
|---|----------|----------|----------|
| P | -2.33740 | 0.33435  | 0.02787  |
| S | 0.24253  | 0.02625  | -0.01367 |
| C | 0.03835  | -1.76710 | 0.01578  |
| C | -0.25811 | -2.45104 | -1.18351 |
| H | -0.32754 | -1.89028 | -2.12874 |
| C | -0.46386 | -3.84060 | -1.16680 |
| H | -0.69795 | -4.36779 | -2.10602 |
| C | -0.36346 | -4.55602 | 0.04031  |
| H | -0.51629 | -5.64735 | 0.04940  |
| C | -0.07328 | -3.87507 | 1.23569  |
| H | -0.00491 | -4.42954 | 2.18593  |
| C | 0.11716  | -2.48213 | 1.22937  |
| H | 0.31725  | -1.94677 | 2.17016  |
| C | -3.34071 | -0.57919 | 1.26058  |
| C | -3.39601 | -1.99153 | 1.17024  |
| H | -2.86957 | -2.51896 | 0.35711  |
| C | -4.12994 | -2.72847 | 2.11216  |
| H | -4.17459 | -3.82666 | 2.02852  |
| C | -4.79910 | -2.07155 | 3.16074  |
| H | -5.37016 | -2.65396 | 3.90199  |
| C | -4.73811 | -0.67129 | 3.26058  |
| H | -5.26391 | -0.15139 | 4.07722  |
| C | -4.01435 | 0.07612  | 2.31642  |
| H | -3.98391 | 1.17389  | 2.39770  |
| C | -2.51179 | 2.11919  | 0.40865  |
| C | -3.32878 | 2.97706  | -0.36075 |
| H | -3.89780 | 2.57961  | -1.21637 |
| C | -3.42285 | 4.34015  | -0.03312 |
| H | -4.06568 | 5.00141  | -0.63696 |
| C | -2.70816 | 4.85752  | 1.06089  |
| H | -2.78675 | 5.92699  | 1.31567  |
| C | -1.89303 | 4.00843  | 1.83078  |
| H | -1.33296 | 4.41024  | 2.69126  |
| C | -1.78680 | 2.64692  | 1.50395  |
| H | -1.14438 | 1.98689  | 2.11090  |
| C | -3.12292 | 0.06982  | -1.60911 |
| C | -4.42170 | -0.46927 | -1.74869 |
| H | -5.00174 | -0.75685 | -0.85743 |
| C | -4.98051 | -0.63314 | -3.02762 |
| H | -5.99549 | -1.05123 | -3.12751 |
| C | -4.25475 | -0.26082 | -4.17208 |



|   |          |          |          |
|---|----------|----------|----------|
| H | -4.69802 | -0.38974 | -5.17297 |
| C | -2.96129 | 0.27582  | -4.03858 |
| H | -2.38899 | 0.56872  | -4.93399 |
| C | -2.39286 | 0.43409  | -2.76508 |
| H | -1.37502 | 0.84731  | -2.66532 |
| P | 2.77779  | 0.21091  | -0.02648 |
| C | 3.08325  | 1.42020  | -1.52944 |
| C | 4.40322  | 2.21534  | -1.41403 |
| H | 4.53616  | 2.81138  | -2.34635 |
| C | 1.90229  | 2.41595  | -1.64943 |
| H | 2.08416  | 3.05276  | -2.54477 |
| H | 1.79947  | 3.09748  | -0.78394 |
| H | 0.93544  | 1.89172  | -1.79946 |
| C | 3.10357  | 1.12678  | 1.66524  |
| C | 4.60348  | 1.27705  | 2.00436  |
| H | 4.69168  | 1.86952  | 2.94372  |
| H | 5.17175  | 1.81855  | 1.22096  |
| H | 5.10250  | 0.30403  | 2.19058  |
| H | 2.78650  | -0.67673 | 2.94809  |
| H | 1.29714  | 0.27395  | 2.60310  |
| H | 2.53343  | 0.90046  | 3.74893  |
| C | 2.45774  | 2.53140  | 1.62570  |
| H | 1.38252  | 2.49619  | 1.34854  |
| H | 2.98318  | 3.23274  | 0.94704  |
| H | 2.51994  | 2.96570  | 2.64963  |
| C | 3.92157  | -1.37504 | -0.17760 |
| C | 3.90531  | -2.15095 | 1.15932  |
| H | 4.45145  | -3.10927 | 1.00410  |
| H | 2.87501  | -2.41143 | 1.48094  |
| H | 4.42133  | -1.61758 | 1.98260  |
| C | 5.38141  | -1.02516 | -0.54263 |
| H | 5.85709  | -0.32636 | 0.17470  |
| H | 5.47798  | -0.60290 | -1.56358 |
| H | 5.97541  | -1.96781 | -0.52704 |
| C | 3.33776  | -2.32489 | -1.25020 |
| H | 3.33487  | -1.89593 | -2.26990 |
| H | 2.30673  | -2.64753 | -1.00250 |
| H | 3.97535  | -3.23762 | -1.28121 |
| H | 4.39257  | 2.93773  | -0.57168 |
| H | 5.29617  | 1.56786  | -1.30795 |
| C | 3.09293  | 0.59578  | -2.83747 |
| H | 3.10151  | 1.30690  | -3.69477 |
| H | 3.99112  | -0.04533 | -2.94336 |
| H | 2.18390  | -0.03531 | -2.94137 |
| C | 2.38867  | 0.34458  | 2.79449  |

Vibrational Spectrum (first 50 lines):

| # | mode | symmetry | wave number | IR intensity | selection rules |
|---|------|----------|-------------|--------------|-----------------|
| # |      | cm**(-1) | km/mol      | IR           | RAMAN           |
| 1 | a    | -67.01   | 0.00000     | YES          | YES             |
| 2 |      | 0.00     | 0.00000     | -            | -               |
| 3 |      | 0.00     | 0.00000     | -            | -               |
| 4 |      | 0.00     | 0.00000     | -            | -               |
| 5 |      | 0.00     | 0.00000     | -            | -               |
| 6 |      | 0.00     | 0.00000     | -            | -               |
| 7 |      | 0.00     | 0.00000     | -            | -               |

|    |   |        |          |     |     |
|----|---|--------|----------|-----|-----|
| 8  | a | 7.90   | 0.12855  | YES | YES |
| 9  | a | 18.82  | 0.37200  | YES | YES |
| 10 | a | 22.05  | 0.77639  | YES | YES |
| 11 | a | 22.34  | 0.34579  | YES | YES |
| 12 | a | 39.04  | 0.33226  | YES | YES |
| 13 | a | 42.33  | 6.86947  | YES | YES |
| 14 | a | 46.43  | 0.03274  | YES | YES |
| 15 | a | 50.50  | 0.41462  | YES | YES |
| 16 | a | 53.54  | 0.46323  | YES | YES |
| 17 | a | 60.38  | 0.41480  | YES | YES |
| 18 | a | 62.97  | 1.76200  | YES | YES |
| 19 | a | 66.81  | 0.86359  | YES | YES |
| 20 | a | 71.44  | 1.13924  | YES | YES |
| 21 | a | 78.06  | 2.41563  | YES | YES |
| 22 | a | 92.83  | 3.48993  | YES | YES |
| 23 | a | 98.60  | 0.26824  | YES | YES |
| 24 | a | 102.55 | 0.14317  | YES | YES |
| 25 | a | 116.82 | 1.20342  | YES | YES |
| 26 | a | 125.58 | 0.47803  | YES | YES |
| 27 | a | 150.26 | 1.17558  | YES | YES |
| 28 | a | 174.91 | 0.73080  | YES | YES |
| 29 | a | 180.75 | 0.08562  | YES | YES |
| 30 | a | 185.19 | 0.94201  | YES | YES |
| 31 | a | 192.68 | 0.27832  | YES | YES |
| 32 | a | 194.64 | 2.08036  | YES | YES |
| 33 | a | 198.75 | 0.24907  | YES | YES |
| 34 | a | 200.41 | 2.42998  | YES | YES |
| 35 | a | 204.84 | 0.46677  | YES | YES |
| 36 | a | 207.43 | 1.03486  | YES | YES |
| 37 | a | 232.94 | 51.57880 | YES | YES |
| 38 | a | 236.37 | 0.76634  | YES | YES |
| 39 | a | 237.58 | 0.36506  | YES | YES |
| 40 | a | 243.17 | 9.20242  | YES | YES |
| 41 | a | 251.79 | 1.95015  | YES | YES |
| 42 | a | 252.52 | 0.48327  | YES | YES |
| 43 | a | 255.37 | 1.83292  | YES | YES |
| 44 | a | 260.18 | 0.09489  | YES | YES |
| 45 | a | 260.96 | 0.51058  | YES | YES |
| 46 | a | 269.51 | 0.97323  | YES | YES |
| 47 | a | 279.69 | 0.08317  | YES | YES |
| 48 | a | 285.13 | 1.02862  | YES | YES |
| 49 | a | 294.10 | 7.40102  | YES | YES |
| 50 | a | 303.86 | 0.04710  | YES | YES |

## TS [PhSe(PPh3)2]<sup>+</sup>

bp86 energy (au): -4704.3263826960

pbe0\_def2-tzvpp\_sp energy (au): -4703.720204176

Zero point energy (au): 0.6239177

Entropy (kJ mol<sup>-1</sup>): 1.13027

Chemical potential (kJ mol<sup>-1</sup>): 1414.96

XYZ coordinates:

80

|    |          |          |          |
|----|----------|----------|----------|
| C  | -4.76992 | 0.70800  | 3.43471  |
| H  | -5.84337 | 0.87852  | 3.61828  |
| C  | 2.83941  | 2.35321  | 4.02022  |
| H  | 3.93867  | 2.35258  | 3.94101  |
| Se | -0.18477 | 0.00064  | -0.00090 |
| P  | -0.24425 | 0.01741  | 2.61624  |
| C  | 0.78184  | 3.35647  | 4.84677  |
| H  | 0.26354  | 4.14150  | 5.42117  |
| C  | -4.08090 | 1.50384  | 2.50228  |
| H  | -4.61144 | 2.29856  | 1.95308  |
| C  | -2.02453 | 0.27039  | 2.96827  |
| C  | 2.09870  | 1.34503  | 3.38490  |
| H  | 2.62340  | 0.56280  | 2.81221  |
| C  | 0.88147  | -4.09662 | 4.47233  |
| H  | 1.13756  | -5.07820 | 4.90324  |
| C  | 0.68661  | 1.33114  | 3.48933  |
| C  | 3.86795  | 1.19987  | -0.21708 |
| H  | 4.41535  | 2.14161  | -0.38635 |
| C  | -2.71491 | 1.28479  | 2.26284  |
| H  | -2.18170 | 1.90850  | 1.52582  |
| C  | 0.23008  | -1.58523 | 3.37018  |
| C  | 0.20061  | -4.02360 | 3.24348  |
| H  | -0.07861 | -4.94681 | 2.70987  |
| C  | 0.03146  | 2.34684  | 4.22108  |
| H  | -1.06613 | 2.34597  | 4.31227  |
| C  | 2.18357  | 3.36169  | 4.74922  |
| H  | 2.76835  | 4.15423  | 5.24398  |
| C  | -2.72198 | -0.52822 | 3.90196  |
| H  | -2.19581 | -1.32358 | 4.45348  |
| C  | 0.91261  | -1.66273 | 4.60479  |
| H  | 1.19015  | -0.74365 | 5.14518  |
| C  | -0.11952 | -2.77468 | 2.68884  |
| H  | -0.64351 | -2.72083 | 1.71972  |
| C  | 2.46225  | -1.20422 | 0.20924  |
| H  | 1.91282  | -2.14580 | 0.36479  |
| C  | -4.09006 | -0.30659 | 4.13087  |
| H  | -4.62785 | -0.93154 | 4.86225  |
| C  | 1.23649  | -2.91717 | 5.14906  |
| H  | 1.76800  | -2.97040 | 6.11317  |
| C  | 3.86842  | -1.19692 | 0.21814  |
| H  | 4.41620  | -2.13837 | 0.38784  |
| C  | 2.46177  | 1.20632  | -0.20960 |

|   |          |          |          |
|---|----------|----------|----------|
| H | 1.91191  | 2.14757  | -0.36559 |
| C | 4.57160  | 0.00168  | 0.00091  |
| H | 5.67389  | 0.00203  | 0.00151  |
| C | 1.76105  | 0.00087  | -0.00036 |
| C | -4.76008 | -0.72534 | -3.45474 |
| H | -5.83165 | -0.90044 | -3.64474 |
| C | 2.85335  | -2.33908 | -4.01616 |
| H | 3.95280  | -2.33153 | -3.94002 |
| P | -0.24159 | -0.01690 | -2.61360 |
| C | 0.79957  | -3.35775 | -4.83333 |
| H | 0.28450  | -4.14793 | -5.40354 |
| C | -4.07844 | -1.50398 | -2.50265 |
| H | -4.61292 | -2.28977 | -1.94450 |
| C | -2.01986 | -0.27559 | -2.97129 |
| C | 2.10838  | -1.33300 | -3.38247 |
| H | 2.62995  | -0.54549 | -2.81416 |
| C | 0.86653  | 4.10199  | -4.46903 |
| H | 1.11723  | 5.08483  | -4.90027 |
| C | 0.69597  | -1.32774 | -3.48369 |
| C | -2.71476 | -1.27916 | -2.25515 |
| H | -2.18703 | -1.88960 | -1.50328 |
| C | 0.22907  | 1.58756  | -3.36570 |
| C | 0.18331  | 4.02573  | -3.24166 |
| H | -0.10339 | 4.94764  | -2.70973 |
| C | 0.04481  | -2.35036 | -4.20933 |
| H | -1.05302 | -2.35627 | -4.29757 |
| C | 2.20158  | -3.35397 | -4.73988 |
| H | 2.78976  | -4.14466 | -5.23353 |
| C | -2.70984 | 0.50571  | -3.92514 |
| H | -2.17967 | 1.29233  | -4.48531 |
| C | 0.91376  | 1.66822  | -4.59902 |
| H | 1.19817  | 0.75047  | -5.13807 |
| C | -0.13023 | 2.77537  | -2.68661 |
| H | -0.65660 | 2.71916  | -1.71893 |
| C | -4.07540 | 0.27803  | -4.16252 |
| H | -4.60756 | 0.88937  | -4.90933 |
| C | 1.23077  | 2.92430  | -5.14377 |
| H | 1.76405  | 2.98004  | -6.10675 |

Vibrational Spectrum (first 50 lines):

| #  | mode | symmetry | wave number | IR intensity | selection rules |
|----|------|----------|-------------|--------------|-----------------|
| #  |      | cm**(-1) | km/mol      | IR           | RAMAN           |
| 1  |      | 0.00     | 0.00000     | -            | -               |
| 2  |      | 0.00     | 0.00000     | -            | -               |
| 3  |      | 0.00     | 0.00000     | -            | -               |
| 4  |      | 0.00     | 0.00000     | -            | -               |
| 5  |      | 0.00     | 0.00000     | -            | -               |
| 6  |      | 0.00     | 0.00000     | -            | -               |
| 7  | a    | 7.86     | 0.00459     | YES          | YES             |
| 8  | a    | 12.66    | 1.35900     | YES          | YES             |
| 9  | a    | 17.61    | 0.01432     | YES          | YES             |
| 10 | a    | 19.25    | 2.64155     | YES          | YES             |
| 11 | a    | 25.29    | 0.34701     | YES          | YES             |
| 12 | a    | 25.58    | 3.05287     | YES          | YES             |
| 13 | a    | 33.17    | 25.55879    | YES          | YES             |
| 14 | a    | 34.89    | 0.34858     | YES          | YES             |

|    |   |        |          |     |     |
|----|---|--------|----------|-----|-----|
| 15 | a | 37.42  | 0.09188  | YES | YES |
| 16 | a | 39.39  | 0.08998  | YES | YES |
| 17 | a | 41.69  | 1.72286  | YES | YES |
| 18 | a | 46.41  | 14.29265 | YES | YES |
| 19 | a | 47.83  | 0.23930  | YES | YES |
| 20 | a | 51.37  | 9.84061  | YES | YES |
| 21 | a | 54.71  | 0.06887  | YES | YES |
| 22 | a | 57.86  | 0.00911  | YES | YES |
| 23 | a | 59.66  | 0.00749  | YES | YES |
| 24 | a | 66.87  | 1.56060  | YES | YES |
| 25 | a | 67.67  | 0.60604  | YES | YES |
| 26 | a | 68.12  | 10.69895 | YES | YES |
| 27 | a | 76.95  | 79.35749 | YES | YES |
| 28 | a | 94.96  | 0.00947  | YES | YES |
| 29 | a | 112.40 | 0.98917  | YES | YES |
| 30 | a | 113.48 | 0.03239  | YES | YES |
| 31 | a | 184.04 | 2.56118  | YES | YES |
| 32 | a | 184.38 | 0.70388  | YES | YES |
| 33 | a | 192.26 | 0.40070  | YES | YES |
| 34 | a | 193.96 | 3.09935  | YES | YES |
| 35 | a | 200.30 | 5.65050  | YES | YES |
| 36 | a | 202.03 | 0.65149  | YES | YES |
| 37 | a | 210.77 | 20.48164 | YES | YES |
| 38 | a | 236.53 | 4.85933  | YES | YES |
| 39 | a | 236.96 | 0.68821  | YES | YES |
| 40 | a | 239.78 | 1.38006  | YES | YES |
| 41 | a | 254.94 | 0.18614  | YES | YES |
| 42 | a | 255.13 | 1.24157  | YES | YES |
| 43 | a | 261.35 | 0.76578  | YES | YES |
| 44 | a | 262.41 | 0.35690  | YES | YES |
| 45 | a | 301.69 | 0.34976  | YES | YES |
| 46 | a | 392.53 | 1.27789  | YES | YES |
| 47 | a | 394.14 | 0.13507  | YES | YES |
| 48 | a | 394.52 | 2.54741  | YES | YES |
| 49 | a | 394.70 | 0.84260  | YES | YES |
| 50 | a | 395.83 | 0.08473  | YES | YES |

## TS [PhSe(PPh3)(PtBu3)]+

bp86 energy (au): -4482.9983823930

pbe0\_def2-tzvpp\_sp energy (au): -4482.464472514

Zero point energy (au): 0.7148867

Entropy (kJ mol<sup>-1</sup>): 1.10885

Chemical potential (kJ mol<sup>-1</sup>): 1665.16

XYZ coordinates:

86

|    |          |          |          |
|----|----------|----------|----------|
| P  | -2.12051 | 0.32729  | 0.02113  |
| Se | 0.54354  | 0.07517  | 0.02827  |
| C  | 0.33041  | -1.86522 | 0.03153  |
| C  | 0.05154  | -2.53014 | -1.18165 |
| H  | -0.01485 | -1.96004 | -2.12172 |
| C  | -0.16118 | -3.91981 | -1.18595 |
| H  | -0.38317 | -4.43298 | -2.13592 |
| C  | -0.08462 | -4.65099 | 0.01277  |
| H  | -0.24252 | -5.74173 | 0.00541  |
| C  | 0.18076  | -3.98575 | 1.22216  |
| H  | 0.22510  | -4.55076 | 2.16774  |
| C  | 0.38090  | -2.59345 | 1.23730  |
| H  | 0.55163  | -2.07624 | 2.19344  |
| C  | -3.12825 | -0.56484 | 1.26669  |
| C  | -3.15232 | -1.98002 | 1.22473  |
| H  | -2.59949 | -2.52385 | 0.44121  |
| C  | -3.89128 | -2.69890 | 2.17668  |
| H  | -3.91226 | -3.79996 | 2.13119  |
| C  | -4.59750 | -2.01974 | 3.18591  |
| H  | -5.17387 | -2.58767 | 3.93426  |
| C  | -4.56764 | -0.61589 | 3.23728  |
| H  | -5.12399 | -0.07821 | 4.02227  |
| C  | -3.83778 | 0.11306  | 2.28330  |
| H  | -3.83083 | 1.21358  | 2.32623  |
| C  | -2.34311 | 2.12245  | 0.33060  |
| C  | -3.17466 | 2.92712  | -0.47937 |
| H  | -3.72371 | 2.48143  | -1.32410 |
| C  | -3.30644 | 4.29926  | -0.20743 |
| H  | -3.95864 | 4.91959  | -0.84356 |
| C  | -2.61574 | 4.87796  | 0.87117  |
| H  | -2.72357 | 5.95449  | 1.08176  |
| C  | -1.78563 | 4.08204  | 1.68063  |
| H  | -1.24298 | 4.53255  | 2.52783  |
| C  | -1.64212 | 2.71164  | 1.41003  |
| H  | -0.98154 | 2.09492  | 2.04286  |
| C  | -2.87264 | -0.01569 | -1.61837 |
| C  | -4.17383 | -0.54933 | -1.75460 |
| H  | -4.77114 | -0.79047 | -0.86089 |
| C  | -4.71172 | -0.77010 | -3.03401 |
| H  | -5.72835 | -1.18454 | -3.13205 |

|   |          |          |          |
|---|----------|----------|----------|
| C | -3.96251 | -0.45905 | -4.18166 |
| H | -4.38918 | -0.63254 | -5.18302 |
| C | -2.66653 | 0.07196  | -4.05096 |
| H | -2.07565 | 0.31618  | -4.94900 |
| C | -2.11888 | 0.28689  | -2.77645 |
| H | -1.09860 | 0.69453  | -2.67733 |
| P | 3.20404  | 0.26694  | 0.00342  |
| C | 3.43625  | 1.91059  | -1.02577 |
| C | 4.80284  | 2.59057  | -0.78496 |
| H | 4.88280  | 3.46839  | -1.46653 |
| C | 2.30092  | 2.90387  | -0.66880 |
| H | 2.44776  | 3.82626  | -1.27586 |
| H | 2.28987  | 3.21258  | 0.39294  |
| H | 1.29882  | 2.50264  | -0.93118 |
| C | 3.76772  | 0.54627  | 1.85122  |
| C | 5.30096  | 0.51703  | 2.03952  |
| H | 5.52907  | 0.75339  | 3.10437  |
| H | 5.82830  | 1.26771  | 1.41680  |
| H | 5.73890  | -0.48114 | 1.83246  |
| H | 3.40964  | -1.57824 | 2.45428  |
| H | 2.00516  | -0.47551 | 2.68575  |
| H | 3.42098  | -0.38235 | 3.78366  |
| C | 3.21939  | 1.89602  | 2.37022  |
| H | 2.11930  | 1.98104  | 2.23595  |
| H | 3.71002  | 2.77670  | 1.90878  |
| H | 3.42195  | 1.94978  | 3.46435  |
| C | 4.20954  | -1.19840 | -0.80994 |
| C | 4.24515  | -2.39525 | 0.16851  |
| H | 4.68315  | -3.26535 | -0.37126 |
| H | 3.23023  | -2.69589 | 0.50586  |
| H | 4.88378  | -2.21378 | 1.05659  |
| C | 5.65440  | -0.80894 | -1.19333 |
| H | 6.24765  | -0.43124 | -0.33619 |
| H | 5.69317  | -0.05549 | -2.00678 |
| H | 6.17013  | -1.72020 | -1.57542 |
| C | 3.45427  | -1.67989 | -2.07200 |
| H | 3.40676  | -0.92484 | -2.87910 |
| H | 2.42278  | -2.00736 | -1.83148 |
| H | 3.99638  | -2.56278 | -2.48104 |
| H | 4.91286  | 2.97605  | 0.24924  |
| H | 5.66226  | 1.92554  | -1.00342 |
| C | 3.28488  | 1.60110  | -2.53295 |
| H | 3.26235  | 2.56885  | -3.08273 |
| H | 4.13264  | 1.01752  | -2.94484 |
| H | 2.33498  | 1.06978  | -2.75827 |
| C | 3.11230  | -0.54805 | 2.72617  |

Vibrational Spectrum (first 50 lines):

| # | mode | symmetry | wave number | IR intensity | selection rules |
|---|------|----------|-------------|--------------|-----------------|
| # |      | cm**(-1) | km/mol      | IR           | RAMAN           |
| 1 |      | 0.00     | 0.00000     | -            | -               |
| 2 |      | 0.00     | 0.00000     | -            | -               |
| 3 |      | 0.00     | 0.00000     | -            | -               |
| 4 |      | 0.00     | 0.00000     | -            | -               |
| 5 |      | 0.00     | 0.00000     | -            | -               |
| 6 |      | 0.00     | 0.00000     | -            | -               |

|    |   |        |          |     |     |
|----|---|--------|----------|-----|-----|
| 7  | a | 8.02   | 0.10843  | YES | YES |
| 8  | a | 12.40  | 1.53054  | YES | YES |
| 9  | a | 16.26  | 0.55798  | YES | YES |
| 10 | a | 22.03  | 3.28677  | YES | YES |
| 11 | a | 31.04  | 25.52181 | YES | YES |
| 12 | a | 37.10  | 1.64608  | YES | YES |
| 13 | a | 41.04  | 2.42926  | YES | YES |
| 14 | a | 45.90  | 2.33219  | YES | YES |
| 15 | a | 46.81  | 15.25501 | YES | YES |
| 16 | a | 51.03  | 5.25771  | YES | YES |
| 17 | a | 56.61  | 12.18422 | YES | YES |
| 18 | a | 61.46  | 32.82781 | YES | YES |
| 19 | a | 62.24  | 1.42182  | YES | YES |
| 20 | a | 70.14  | 2.61750  | YES | YES |
| 21 | a | 80.84  | 0.29815  | YES | YES |
| 22 | a | 93.87  | 0.11471  | YES | YES |
| 23 | a | 94.97  | 9.32824  | YES | YES |
| 24 | a | 99.33  | 0.79343  | YES | YES |
| 25 | a | 113.31 | 0.70666  | YES | YES |
| 26 | a | 117.53 | 0.73744  | YES | YES |
| 27 | a | 126.05 | 0.18886  | YES | YES |
| 28 | a | 182.17 | 0.05234  | YES | YES |
| 29 | a | 184.62 | 1.20037  | YES | YES |
| 30 | a | 189.76 | 0.58150  | YES | YES |
| 31 | a | 193.15 | 1.54039  | YES | YES |
| 32 | a | 195.68 | 0.50597  | YES | YES |
| 33 | a | 201.57 | 1.77390  | YES | YES |
| 34 | a | 202.77 | 0.29551  | YES | YES |
| 35 | a | 209.66 | 0.98187  | YES | YES |
| 36 | a | 214.70 | 19.84247 | YES | YES |
| 37 | a | 217.56 | 1.78811  | YES | YES |
| 38 | a | 236.29 | 3.95516  | YES | YES |
| 39 | a | 237.22 | 0.79110  | YES | YES |
| 40 | a | 243.26 | 0.39641  | YES | YES |
| 41 | a | 248.51 | 0.47270  | YES | YES |
| 42 | a | 252.82 | 0.52254  | YES | YES |
| 43 | a | 254.24 | 0.68967  | YES | YES |
| 44 | a | 257.60 | 0.29281  | YES | YES |
| 45 | a | 261.05 | 0.27334  | YES | YES |
| 46 | a | 262.37 | 0.50981  | YES | YES |
| 47 | a | 271.24 | 0.91203  | YES | YES |
| 48 | a | 286.09 | 0.55276  | YES | YES |
| 49 | a | 289.48 | 0.16435  | YES | YES |
| 50 | a | 301.24 | 0.93987  | YES | YES |



## BP86/def2-TZVPP level optimisations

### PPh<sub>3</sub>

bp86\_def2-tzvpp energy (au): -1036.6280780380

Zero point energy (au): 0.2655762

Entropy (kJ mol<sup>-1</sup>): 0.56778

Chemical potential (kJ mol<sup>-1</sup>): 573.59

XYZ coordinates:

34

|   |          |          |          |
|---|----------|----------|----------|
| P | 0.00255  | -1.17284 | -0.00199 |
| C | 1.19139  | -0.37003 | 1.16124  |
| C | -0.11433 | -0.97560 | -2.77323 |
| H | -0.73909 | -1.86600 | -2.67800 |
| C | 1.23854  | 0.75228  | -1.76014 |
| H | 1.66464  | 1.22792  | -0.87660 |
| C | 0.41223  | -0.37348 | -1.61588 |
| C | 3.40431  | -0.45808 | 2.17739  |
| H | 4.37467  | -0.94604 | 2.27577  |
| C | 1.52368  | 1.26659  | -3.02845 |
| H | 2.17085  | 2.13943  | -3.12356 |
| C | 0.90866  | 0.77336  | 1.92530  |
| H | -0.06321 | 1.25893  | 1.83391  |
| C | 0.98153  | 0.66991  | -4.16920 |
| H | 1.20557  | 1.07255  | -5.15739 |
| C | 2.44801  | -0.98477 | 1.30793  |
| H | 2.67277  | -1.88824 | 0.73738  |
| C | 1.86142  | 1.29231  | 2.80668  |
| H | 1.62523  | 2.17960  | 3.39554  |
| C | 3.11157  | 0.68171  | 2.93238  |
| H | 3.85288  | 1.08750  | 3.62133  |
| C | 0.15782  | -0.45238 | -4.03811 |
| H | -0.26288 | -0.92953 | -4.92396 |
| C | -2.17443 | 0.70733  | -0.23378 |
| H | -1.65053 | 1.15217  | -1.07995 |
| C | -1.60050 | -0.37535 | 0.45110  |
| C | -2.30457 | -0.93829 | 1.53161  |
| H | -1.88191 | -1.79569 | 2.05928  |
| C | -3.41555 | 1.21881  | 0.15792  |
| H | -3.84932 | 2.05800  | -0.38739 |
| C | -4.09681 | 0.66258  | 1.24299  |
| H | -5.06441 | 1.06294  | 1.54676  |
| C | -3.53539 | -0.41717 | 1.93226  |
| H | -4.06349 | -0.86286 | 2.77592  |

Vibrational Spectrum (first 50 lines):

| #  | mode | symmetry | wave number<br>cm**(-1) | IR intensity<br>km/mol | IR  | RAMAN | selection rules |
|----|------|----------|-------------------------|------------------------|-----|-------|-----------------|
| 1  |      |          | 0.00                    | 0.00000                | -   | -     |                 |
| 2  |      |          | 0.00                    | 0.00000                | -   | -     |                 |
| 3  |      |          | 0.00                    | 0.00000                | -   | -     |                 |
| 4  |      |          | 0.00                    | 0.00000                | -   | -     |                 |
| 5  |      |          | 0.00                    | 0.00000                | -   | -     |                 |
| 6  |      |          | 0.00                    | 0.00000                | -   | -     |                 |
| 7  | a    |          | 20.61                   | 0.35411                | YES | YES   |                 |
| 8  | a    |          | 23.32                   | 0.37352                | YES | YES   |                 |
| 9  | a    |          | 39.87                   | 0.00853                | YES | YES   |                 |
| 10 | a    |          | 48.22                   | 0.07288                | YES | YES   |                 |
| 11 | a    |          | 50.79                   | 0.09938                | YES | YES   |                 |
| 12 | a    |          | 63.29                   | 0.37296                | YES | YES   |                 |
| 13 | a    |          | 174.18                  | 0.34206                | YES | YES   |                 |
| 14 | a    |          | 190.45                  | 1.30932                | YES | YES   |                 |
| 15 | a    |          | 193.20                  | 1.34084                | YES | YES   |                 |
| 16 | a    |          | 236.27                  | 0.69361                | YES | YES   |                 |
| 17 | a    |          | 249.79                  | 0.30630                | YES | YES   |                 |
| 18 | a    |          | 251.29                  | 0.33286                | YES | YES   |                 |
| 19 | a    |          | 389.78                  | 1.34843                | YES | YES   |                 |
| 20 | a    |          | 390.25                  | 0.90345                | YES | YES   |                 |
| 21 | a    |          | 391.24                  | 0.88146                | YES | YES   |                 |
| 22 | a    |          | 396.70                  | 0.12589                | YES | YES   |                 |
| 23 | a    |          | 416.22                  | 5.32980                | YES | YES   |                 |
| 24 | a    |          | 418.30                  | 6.01308                | YES | YES   |                 |
| 25 | a    |          | 489.77                  | 27.77965               | YES | YES   |                 |
| 26 | a    |          | 492.37                  | 28.41900               | YES | YES   |                 |
| 27 | a    |          | 499.29                  | 15.25823               | YES | YES   |                 |
| 28 | a    |          | 611.18                  | 0.15836                | YES | YES   |                 |
| 29 | a    |          | 612.46                  | 0.20297                | YES | YES   |                 |
| 30 | a    |          | 612.78                  | 0.06189                | YES | YES   |                 |
| 31 | a    |          | 671.20                  | 0.74592                | YES | YES   |                 |
| 32 | a    |          | 685.61                  | 1.61912                | YES | YES   |                 |
| 33 | a    |          | 686.64                  | 1.75468                | YES | YES   |                 |
| 34 | a    |          | 692.40                  | 34.31979               | YES | YES   |                 |
| 35 | a    |          | 693.09                  | 36.88420               | YES | YES   |                 |
| 36 | a    |          | 693.77                  | 31.32465               | YES | YES   |                 |
| 37 | a    |          | 737.98                  | 24.86374               | YES | YES   |                 |
| 38 | a    |          | 738.70                  | 23.12285               | YES | YES   |                 |
| 39 | a    |          | 739.46                  | 23.77117               | YES | YES   |                 |
| 40 | a    |          | 835.46                  | 0.09627                | YES | YES   |                 |
| 41 | a    |          | 836.43                  | 0.10392                | YES | YES   |                 |
| 42 | a    |          | 839.24                  | 0.12623                | YES | YES   |                 |
| 43 | a    |          | 904.97                  | 0.76949                | YES | YES   |                 |
| 44 | a    |          | 906.30                  | 0.78603                | YES | YES   |                 |
| 45 | a    |          | 907.40                  | 0.26704                | YES | YES   |                 |
| 46 | a    |          | 956.13                  | 0.00640                | YES | YES   |                 |
| 47 | a    |          | 956.78                  | 0.02453                | YES | YES   |                 |
| 48 | a    |          | 958.23                  | 0.11303                | YES | YES   |                 |
| 49 | a    |          | 971.17                  | 0.01184                | YES | YES   |                 |
| 50 | a    |          | 972.48                  | 0.02498                | YES | YES   |                 |

**P(<sup>t</sup>Bu)<sub>3</sub>**

bp86\_def2-tzvpp energy (au): -815.1088131371

Zero point energy (au): 0.3568443

Entropy (kJ mol<sup>-1</sup>): 0.54296

Chemical potential (kJ mol<sup>-1</sup>): 826.25

XYZ coordinates:

40

|   |          |          |          |
|---|----------|----------|----------|
| P | 0.68550  | 0.00078  | -0.00069 |
| C | -0.02432 | 1.70515  | -0.61191 |
| C | -1.50107 | 1.75305  | -1.03929 |
| H | -1.76291 | 2.78255  | -1.33708 |
| C | 0.86759  | 2.15106  | -1.79451 |
| H | 0.60341  | 3.18503  | -2.07003 |
| H | 0.74513  | 1.53255  | -2.68821 |
| H | 1.93005  | 2.13614  | -1.51555 |
| C | -0.02308 | -1.38193 | -1.17130 |
| C | -1.49883 | -1.77950 | -0.99842 |
| H | -1.75777 | -2.55492 | -1.73906 |
| H | -2.18025 | -0.93496 | -1.15652 |
| H | -1.70622 | -2.20103 | -0.00743 |
| H | 0.75168  | -3.09159 | 0.01727  |
| H | 1.93375  | -2.37504 | -1.09344 |
| H | 0.60860  | -3.38412 | -1.72219 |
| C | 0.19827  | -0.95781 | -2.63704 |
| H | 1.23576  | -0.64611 | -2.82025 |
| H | -0.47099 | -0.15074 | -2.95567 |
| H | -0.00547 | -1.82486 | -3.28585 |
| C | -0.02517 | -0.32207 | 1.78180  |
| C | 0.19413  | -1.80414 | 2.14746  |
| H | -0.01249 | -1.93298 | 3.22238  |
| H | 1.23211  | -2.11776 | 1.97151  |
| H | -0.47384 | -2.48350 | 1.60606  |
| C | -1.50099 | 0.02793  | 2.03933  |
| H | -2.18203 | -0.52822 | 1.38425  |
| H | -1.70728 | 1.09765  | 1.91373  |
| H | -1.76064 | -0.22965 | 3.08000  |
| C | 0.87087  | 0.47537  | 2.75881  |
| H | 0.75501  | 1.55942  | 2.66865  |
| H | 1.93187  | 0.23433  | 2.60710  |
| H | 0.60452  | 0.20052  | 3.79262  |
| H | -1.70856 | 1.10796  | -1.90148 |
| H | -2.18020 | 1.46346  | -0.22847 |
| C | 0.19912  | 2.76159  | 0.48880  |
| H | -0.00883 | 3.75740  | 0.06505  |
| H | -0.46635 | 2.63172  | 1.34985  |
| H | 1.23794  | 2.76607  | 0.84588  |
| C | 0.87207  | -2.62694 | -0.96591 |

Vibrational Spectrum (first 50 lines):

| #  | mode | symmetry | wave number<br>cm**(-1) | IR intensity<br>km/mol | IR  | RAMAN | selection rules |
|----|------|----------|-------------------------|------------------------|-----|-------|-----------------|
| 1  |      |          | 0.00                    | 0.00000                | -   | -     |                 |
| 2  |      |          | 0.00                    | 0.00000                | -   | -     |                 |
| 3  |      |          | 0.00                    | 0.00000                | -   | -     |                 |
| 4  |      |          | 0.00                    | 0.00000                | -   | -     |                 |
| 5  |      |          | 0.00                    | 0.00000                | -   | -     |                 |
| 6  |      |          | 0.00                    | 0.00000                | -   | -     |                 |
| 7  | a    |          | 89.23                   | 0.01690                | YES | YES   |                 |
| 8  | a    |          | 92.33                   | 0.01584                | YES | YES   |                 |
| 9  | a    |          | 125.32                  | 0.00178                | YES | YES   |                 |
| 10 | a    |          | 168.32                  | 0.10368                | YES | YES   |                 |
| 11 | a    |          | 180.02                  | 0.01230                | YES | YES   |                 |
| 12 | a    |          | 182.14                  | 0.00610                | YES | YES   |                 |
| 13 | a    |          | 194.06                  | 0.02100                | YES | YES   |                 |
| 14 | a    |          | 199.15                  | 0.00678                | YES | YES   |                 |
| 15 | a    |          | 207.41                  | 0.01990                | YES | YES   |                 |
| 16 | a    |          | 233.39                  | 0.10087                | YES | YES   |                 |
| 17 | a    |          | 239.69                  | 0.16219                | YES | YES   |                 |
| 18 | a    |          | 241.36                  | 0.04735                | YES | YES   |                 |
| 19 | a    |          | 254.59                  | 0.28294                | YES | YES   |                 |
| 20 | a    |          | 255.88                  | 0.22683                | YES | YES   |                 |
| 21 | a    |          | 263.56                  | 0.02394                | YES | YES   |                 |
| 22 | a    |          | 271.54                  | 0.01149                | YES | YES   |                 |
| 23 | a    |          | 277.14                  | 0.01924                | YES | YES   |                 |
| 24 | a    |          | 284.77                  | 0.00262                | YES | YES   |                 |
| 25 | a    |          | 322.76                  | 0.07550                | YES | YES   |                 |
| 26 | a    |          | 332.35                  | 0.20913                | YES | YES   |                 |
| 27 | a    |          | 341.42                  | 0.24713                | YES | YES   |                 |
| 28 | a    |          | 346.79                  | 0.01405                | YES | YES   |                 |
| 29 | a    |          | 360.46                  | 0.21324                | YES | YES   |                 |
| 30 | a    |          | 363.13                  | 0.27428                | YES | YES   |                 |
| 31 | a    |          | 393.75                  | 0.41595                | YES | YES   |                 |
| 32 | a    |          | 395.51                  | 0.17576                | YES | YES   |                 |
| 33 | a    |          | 397.48                  | 0.35974                | YES | YES   |                 |
| 34 | a    |          | 445.37                  | 3.87887                | YES | YES   |                 |
| 35 | a    |          | 447.74                  | 3.94365                | YES | YES   |                 |
| 36 | a    |          | 468.93                  | 0.92062                | YES | YES   |                 |
| 37 | a    |          | 525.85                  | 0.27230                | YES | YES   |                 |
| 38 | a    |          | 553.46                  | 5.72614                | YES | YES   |                 |
| 39 | a    |          | 555.00                  | 5.80944                | YES | YES   |                 |
| 40 | a    |          | 785.99                  | 8.55442                | YES | YES   |                 |
| 41 | a    |          | 787.97                  | 8.87783                | YES | YES   |                 |
| 42 | a    |          | 789.95                  | 2.85750                | YES | YES   |                 |
| 43 | a    |          | 904.79                  | 0.68575                | YES | YES   |                 |
| 44 | a    |          | 906.21                  | 1.56775                | YES | YES   |                 |
| 45 | a    |          | 906.40                  | 1.78698                | YES | YES   |                 |
| 46 | a    |          | 911.46                  | 0.35847                | YES | YES   |                 |
| 47 | a    |          | 913.84                  | 0.80155                | YES | YES   |                 |
| 48 | a    |          | 915.59                  | 1.14546                | YES | YES   |                 |
| 49 | a    |          | 924.87                  | 0.09329                | YES | YES   |                 |
| 50 | a    |          | 929.90                  | 0.75201                | YES | YES   |                 |

**[GaCl<sub>4</sub>]<sup>-</sup>**

bp86\_def2-tzvpp energy (au): -3766.5324232560

Zero point energy (au): 0.0045708

Entropy (kJ mol<sup>-1</sup>): 0.36455

Chemical potential (kJ mol<sup>-1</sup>): -73.86

XYZ coordinates:

5

|    |          |          |          |
|----|----------|----------|----------|
| Ga | 0.00000  | 0.00000  | 0.00000  |
| Cl | -1.28337 | -1.28337 | -1.28337 |
| Cl | 1.28337  | 1.28337  | -1.28337 |
| Cl | 1.28337  | -1.28337 | 1.28337  |
| Cl | -1.28337 | 1.28337  | 1.28337  |

Vibrational Spectrum:

| #  | mode | symmetry             | wave number | IR intensity | selection rules |
|----|------|----------------------|-------------|--------------|-----------------|
| #  |      | cm <sup>**(-1)</sup> | km/mol      | IR           | RAMAN           |
| 1  |      | 0.00                 | 0.00000     | -            | -               |
| 2  |      | 0.00                 | 0.00000     | -            | -               |
| 3  |      | 0.00                 | 0.00000     | -            | -               |
| 4  |      | 0.00                 | 0.00000     | -            | -               |
| 5  |      | 0.00                 | 0.00000     | -            | -               |
| 6  |      | 0.00                 | 0.00000     | -            | -               |
| 7  | e    | 97.80                | 0.00000     | NO           | YES             |
| 8  | e    | 97.80                | 0.00000     | NO           | YES             |
| 9  | t2   | 139.98               | 8.76876     | YES          | YES             |
| 10 | t2   | 139.98               | 8.76876     | YES          | YES             |
| 11 | t2   | 139.98               | 8.76876     | YES          | YES             |
| 12 | a1   | 317.51               | 0.00000     | NO           | YES             |
| 13 | t2   | 357.76               | 91.42040    | YES          | YES             |
| 14 | t2   | 357.76               | 91.42040    | YES          | YES             |
| 15 | t2   | 357.76               | 91.42040    | YES          | YES             |

**[PhS]<sup>+</sup>**

bp86\_def2-tzvpp energy (au): -629.6545304899

Zero point energy (au): 0.0880630

Entropy (kJ mol<sup>-1</sup>): 0.32871Chemical potential (kJ mol<sup>-1</sup>): 151.38

XYZ coordinates:

12

|   |          |          |          |
|---|----------|----------|----------|
| C | -2.26206 | -0.00005 | -0.00136 |
| H | -3.35390 | -0.00009 | -0.00289 |
| C | -0.20711 | 1.25720  | 0.00121  |
| H | 0.36333  | 2.18581  | 0.00208  |
| C | -1.58085 | 1.24268  | -0.00039 |
| H | -2.15042 | 2.17120  | -0.00096 |
| C | 0.53058  | 0.00004  | 0.00147  |
| C | -0.20704 | -1.25716 | 0.00115  |
| H | 0.36349  | -2.18573 | 0.00185  |
| C | -1.58078 | -1.24274 | -0.00034 |
| H | -2.15029 | -2.17128 | -0.00085 |
| S | 2.18563  | 0.00008  | 0.00089  |

Vibrational Spectrum:

| # mode # | symmetry | wave number<br>cm <sup>**(-1)</sup> | km/mol   | IR intensity<br>IR | selection rules<br>RAMAN |
|----------|----------|-------------------------------------|----------|--------------------|--------------------------|
| 1        |          | 0.00                                | 0.00000  | -                  | -                        |
| 2        |          | 0.00                                | 0.00000  | -                  | -                        |
| 3        |          | 0.00                                | 0.00000  | -                  | -                        |
| 4        |          | 0.00                                | 0.00000  | -                  | -                        |
| 5        |          | 0.00                                | 0.00000  | -                  | -                        |
| 6        |          | 0.00                                | 0.00000  | -                  | -                        |
| 7        | a        | 100.18                              | 0.00178  | YES                | YES                      |
| 8        | a        | 291.01                              | 0.00136  | YES                | YES                      |
| 9        | a        | 303.24                              | 0.00000  | YES                | YES                      |
| 10       | a        | 358.02                              | 0.29260  | YES                | YES                      |
| 11       | a        | 428.21                              | 0.20408  | YES                | YES                      |
| 12       | a        | 566.17                              | 2.42236  | YES                | YES                      |
| 13       | a        | 602.54                              | 41.92228 | YES                | YES                      |
| 14       | a        | 718.45                              | 3.66257  | YES                | YES                      |
| 15       | a        | 785.94                              | 31.57815 | YES                | YES                      |
| 16       | a        | 799.72                              | 0.00000  | YES                | YES                      |
| 17       | a        | 967.90                              | 6.42885  | YES                | YES                      |
| 18       | a        | 983.91                              | 7.90641  | YES                | YES                      |
| 19       | a        | 987.18                              | 0.86919  | YES                | YES                      |
| 20       | a        | 996.43                              | 0.00001  | YES                | YES                      |
| 21       | a        | 1018.69                             | 1.84399  | YES                | YES                      |
| 22       | a        | 1075.24                             | 3.36393  | YES                | YES                      |

|    |   |         |           |     |     |
|----|---|---------|-----------|-----|-----|
| 23 | a | 1123.35 | 21.82881  | YES | YES |
| 24 | a | 1154.17 | 13.45895  | YES | YES |
| 25 | a | 1188.36 | 0.83582   | YES | YES |
| 26 | a | 1244.30 | 4.57448   | YES | YES |
| 27 | a | 1353.23 | 1.43277   | YES | YES |
| 28 | a | 1418.07 | 17.39326  | YES | YES |
| 29 | a | 1437.11 | 97.70096  | YES | YES |
| 30 | a | 1502.95 | 13.88875  | YES | YES |
| 31 | a | 1591.19 | 130.04503 | YES | YES |
| 32 | a | 3113.94 | 0.92279   | YES | YES |
| 33 | a | 3129.92 | 0.99331   | YES | YES |
| 34 | a | 3131.61 | 8.60443   | YES | YES |
| 35 | a | 3140.82 | 15.47455  | YES | YES |
| 36 | a | 3143.31 | 0.09839   | YES | YES |

## PhSCI.GaCl3\_iso2

bp86\_def2-tzvpp energy (au): -4396.3642993750

Zero point energy (au): 0.0943912

Entropy (kJ mol<sup>-1</sup>): 0.57110

Chemical potential (kJ mol<sup>-1</sup>): 120.23

XYZ coordinates:

17

|    |          |          |          |
|----|----------|----------|----------|
| S  | 1.04292  | 1.38494  | 0.97662  |
| C  | -0.44424 | 0.67293  | 0.36687  |
| C  | -0.50209 | 0.13817  | -0.93457 |
| H  | 0.40576  | 0.09146  | -1.53531 |
| C  | -1.71645 | -0.33204 | -1.42829 |
| H  | -1.76593 | -0.75197 | -2.43261 |
| C  | -2.87146 | -0.25734 | -0.64008 |
| H  | -3.82053 | -0.62009 | -1.03539 |
| C  | -2.81731 | 0.27930  | 0.65062  |
| H  | -3.71964 | 0.33653  | 1.25887  |
| C  | -1.60396 | 0.73474  | 1.16336  |
| H  | -1.53995 | 1.14733  | 2.16956  |
| Ga | 4.10640  | -0.59065 | 0.08636  |
| Cl | 2.13716  | -0.30247 | 1.68607  |
| Cl | 4.97075  | -2.24731 | 1.17067  |
| Cl | 5.03139  | 1.34933  | 0.26123  |
| Cl | 3.10717  | -1.03286 | -1.78397 |

Vibrational Spectrum (first 50 lines):

| #  | mode | symmetry             | wave number | IR intensity | selection rules |
|----|------|----------------------|-------------|--------------|-----------------|
| #  |      | cm <sup>**(-1)</sup> | km/mol      | IR           | RAMAN           |
| 1  |      | 0.00                 | 0.00000     | -            | -               |
| 2  |      | 0.00                 | 0.00000     | -            | -               |
| 3  |      | 0.00                 | 0.00000     | -            | -               |
| 4  |      | 0.00                 | 0.00000     | -            | -               |
| 5  |      | 0.00                 | 0.00000     | -            | -               |
| 6  |      | 0.00                 | 0.00000     | -            | -               |
| 7  | a    | 14.28                | 0.10465     | YES          | YES             |
| 8  | a    | 20.62                | 0.03294     | YES          | YES             |
| 9  | a    | 40.09                | 0.98027     | YES          | YES             |
| 10 | a    | 48.57                | 0.30166     | YES          | YES             |
| 11 | a    | 62.03                | 0.65646     | YES          | YES             |
| 12 | a    | 84.96                | 0.15447     | YES          | YES             |
| 13 | a    | 100.33               | 0.22223     | YES          | YES             |
| 14 | a    | 120.38               | 3.98287     | YES          | YES             |
| 15 | a    | 123.67               | 5.03448     | YES          | YES             |
| 16 | a    | 136.06               | 39.90869    | YES          | YES             |
| 17 | a    | 167.15               | 34.90904    | YES          | YES             |
| 18 | a    | 221.91               | 12.38542    | YES          | YES             |
| 19 | a    | 273.15               | 1.71381     | YES          | YES             |



|    |   |         |          |     |     |
|----|---|---------|----------|-----|-----|
| 20 | a | 342.19  | 15.61539 | YES | YES |
| 21 | a | 387.10  | 37.94688 | YES | YES |
| 22 | a | 394.87  | 6.15405  | YES | YES |
| 23 | a | 404.90  | 11.88669 | YES | YES |
| 24 | a | 413.59  | 88.48624 | YES | YES |
| 25 | a | 421.21  | 68.94336 | YES | YES |
| 26 | a | 487.85  | 11.97013 | YES | YES |
| 27 | a | 605.18  | 0.20532  | YES | YES |
| 28 | a | 679.10  | 32.57357 | YES | YES |
| 29 | a | 703.01  | 3.99429  | YES | YES |
| 30 | a | 753.80  | 33.71137 | YES | YES |
| 31 | a | 831.53  | 0.03215  | YES | YES |
| 32 | a | 929.07  | 2.12009  | YES | YES |
| 33 | a | 967.88  | 0.05599  | YES | YES |
| 34 | a | 987.33  | 0.92338  | YES | YES |
| 35 | a | 989.95  | 0.29340  | YES | YES |
| 36 | a | 1016.79 | 0.08614  | YES | YES |
| 37 | a | 1062.86 | 42.73208 | YES | YES |
| 38 | a | 1072.55 | 3.13459  | YES | YES |
| 39 | a | 1154.83 | 0.34603  | YES | YES |
| 40 | a | 1169.60 | 5.05673  | YES | YES |
| 41 | a | 1291.13 | 0.56955  | YES | YES |
| 42 | a | 1335.73 | 5.67002  | YES | YES |
| 43 | a | 1430.08 | 13.94716 | YES | YES |
| 44 | a | 1456.67 | 0.70594  | YES | YES |
| 45 | a | 1560.45 | 0.46906  | YES | YES |
| 46 | a | 1571.27 | 23.84590 | YES | YES |
| 47 | a | 3104.38 | 0.55306  | YES | YES |
| 48 | a | 3114.47 | 6.14624  | YES | YES |
| 49 | a | 3120.63 | 1.78443  | YES | YES |
| 50 | a | 3127.79 | 4.21963  | YES | YES |

**[PhSe]+**

bp86\_def2-tzvpp energy (au): -2633.2523372090

Zero point energy (au): 0.0874961

Entropy (kJ mol<sup>-1</sup>): 0.34040Chemical potential (kJ mol<sup>-1</sup>): 146.88

XYZ coordinates:

12

|    |          |          |          |
|----|----------|----------|----------|
| C  | -3.00029 | -0.00007 | -0.00005 |
| H  | -4.09168 | -0.00013 | -0.00030 |
| C  | -0.93954 | 1.25160  | -0.00007 |
| H  | -0.37528 | 2.18373  | -0.00029 |
| C  | -2.31622 | 1.23882  | 0.00024  |
| H  | -2.88148 | 2.16989  | 0.00067  |
| C  | -0.21351 | 0.00002  | 0.00007  |
| C  | -0.93945 | -1.25161 | 0.00025  |
| H  | -0.37516 | -2.18372 | 0.00032  |
| C  | -2.31613 | -1.23891 | -0.00009 |
| H  | -2.88134 | -2.17003 | -0.00024 |
| Se | 1.59908  | 0.00008  | -0.00006 |

Vibrational Spectrum:

| #  | mode | symmetry             | wave number | IR intensity | selection rules |
|----|------|----------------------|-------------|--------------|-----------------|
| #  |      | cm <sup>**(-1)</sup> | km/mol      | IR           | RAMAN           |
| 1  |      | 0.00                 | 0.00000     | -            | -               |
| 2  |      | 0.00                 | 0.00000     | -            | -               |
| 3  |      | 0.00                 | 0.00000     | -            | -               |
| 4  |      | 0.00                 | 0.00000     | -            | -               |
| 5  |      | 0.00                 | 0.00000     | -            | -               |
| 6  |      | 0.00                 | 0.00000     | -            | -               |
| 7  | a    | 93.16                | 0.00562     | YES          | YES             |
| 8  | a    | 240.15               | 0.00059     | YES          | YES             |
| 9  | a    | 312.26               | 0.00000     | YES          | YES             |
| 10 | a    | 331.10               | 0.03716     | YES          | YES             |
| 11 | a    | 364.25               | 0.04001     | YES          | YES             |
| 12 | a    | 569.49               | 1.81708     | YES          | YES             |
| 13 | a    | 608.13               | 41.47548    | YES          | YES             |
| 14 | a    | 682.55               | 3.22124     | YES          | YES             |
| 15 | a    | 773.72               | 33.50259    | YES          | YES             |
| 16 | a    | 805.11               | 0.00002     | YES          | YES             |
| 17 | a    | 971.89               | 14.41339    | YES          | YES             |
| 18 | a    | 976.67               | 0.88845     | YES          | YES             |
| 19 | a    | 989.48               | 5.84231     | YES          | YES             |
| 20 | a    | 994.04               | 0.00049     | YES          | YES             |
| 21 | a    | 1015.15              | 1.23348     | YES          | YES             |
| 22 | a    | 1057.75              | 24.92509    | YES          | YES             |
| 23 | a    | 1077.87              | 3.88736     | YES          | YES             |
| 24 | a    | 1156.02              | 9.33838     | YES          | YES             |
| 25 | a    | 1182.75              | 4.92094     | YES          | YES             |
| 26 | a    | 1253.96              | 5.90009     | YES          | YES             |

|    |   |         |           |     |     |
|----|---|---------|-----------|-----|-----|
| 27 | a | 1354.76 | 3.08619   | YES | YES |
| 28 | a | 1421.14 | 13.42113  | YES | YES |
| 29 | a | 1428.47 | 77.30915  | YES | YES |
| 30 | a | 1500.23 | 9.52522   | YES | YES |
| 31 | a | 1584.74 | 140.76685 | YES | YES |
| 32 | a | 3116.44 | 0.46948   | YES | YES |
| 33 | a | 3129.63 | 0.98603   | YES | YES |
| 34 | a | 3131.60 | 7.29925   | YES | YES |
| 35 | a | 3140.58 | 12.06787  | YES | YES |
| 36 | a | 3143.28 | 0.07826   | YES | YES |

## PhSeCl.GaCl3\_iso2

bp86\_def2-tzvpp energy (au): -6399.9636572000

Zero point energy (au): 0.0935660

Entropy (kJ mol<sup>-1</sup>): 0.58286

Chemical potential (kJ mol<sup>-1</sup>): 115.53

XYZ coordinates:

17

|    |          |          |          |
|----|----------|----------|----------|
| Se | 0.45126  | 0.44597  | 1.56594  |
| C  | -1.15728 | -0.34788 | 0.91322  |
| C  | -1.20271 | -0.89359 | -0.38127 |
| H  | -0.29623 | -0.93485 | -0.98424 |
| C  | -2.41110 | -1.38755 | -0.87021 |
| H  | -2.45347 | -1.81771 | -1.87060 |
| C  | -3.56655 | -1.32418 | -0.08245 |
| H  | -4.51001 | -1.70537 | -0.47383 |
| C  | -3.51940 | -0.77710 | 1.20391  |
| H  | -4.42132 | -0.73105 | 1.81388  |
| C  | -2.31263 | -0.29664 | 1.71232  |
| H  | -2.25799 | 0.12070  | 2.71703  |
| Ga | 3.48135  | -1.67717 | 0.65741  |
| Cl | 1.57049  | -1.39132 | 2.29249  |
| Cl | 4.40974  | -3.32947 | 1.69373  |
| Cl | 4.40741  | 0.26902  | 0.80066  |
| Cl | 2.43245  | -2.12482 | -1.18600 |

Vibrational Spectrum (first 50 lines):

| # mode # | symmetry | wave number<br>cm <sup>**(-1)</sup> | IR intensity<br>km/mol | IR  | selection rules<br>RAMAN |
|----------|----------|-------------------------------------|------------------------|-----|--------------------------|
| 1        |          | 0.00                                | 0.00000                | -   | -                        |
| 2        |          | 0.00                                | 0.00000                | -   | -                        |
| 3        |          | 0.00                                | 0.00000                | -   | -                        |
| 4        |          | 0.00                                | 0.00000                | -   | -                        |
| 5        |          | 0.00                                | 0.00000                | -   | -                        |
| 6        |          | 0.00                                | 0.00000                | -   | -                        |
| 7        | a        | 14.84                               | 0.10641                | YES | YES                      |
| 8        | a        | 20.57                               | 0.02926                | YES | YES                      |
| 9        | a        | 37.53                               | 0.82333                | YES | YES                      |
| 10       | a        | 42.83                               | 0.01825                | YES | YES                      |
| 11       | a        | 56.34                               | 0.75082                | YES | YES                      |
| 12       | a        | 77.52                               | 0.31842                | YES | YES                      |
| 13       | a        | 96.87                               | 0.16651                | YES | YES                      |
| 14       | a        | 120.42                              | 3.88784                | YES | YES                      |
| 15       | a        | 124.38                              | 5.12084                | YES | YES                      |
| 16       | a        | 136.48                              | 35.11938               | YES | YES                      |
| 17       | a        | 170.89                              | 36.55572               | YES | YES                      |
| 18       | a        | 201.38                              | 12.57343               | YES | YES                      |
| 19       | a        | 231.11                              | 1.07172                | YES | YES                      |
| 20       | a        | 299.54                              | 30.43154               | YES | YES                      |

|    |   |         |          |     |     |
|----|---|---------|----------|-----|-----|
| 21 | a | 318.44  | 23.14265 | YES | YES |
| 22 | a | 344.38  | 5.10419  | YES | YES |
| 23 | a | 395.69  | 0.97527  | YES | YES |
| 24 | a | 411.53  | 70.69273 | YES | YES |
| 25 | a | 419.18  | 68.15158 | YES | YES |
| 26 | a | 458.70  | 8.48885  | YES | YES |
| 27 | a | 604.22  | 0.16765  | YES | YES |
| 28 | a | 670.50  | 0.98253  | YES | YES |
| 29 | a | 680.87  | 29.99781 | YES | YES |
| 30 | a | 743.88  | 38.08813 | YES | YES |
| 31 | a | 831.50  | 0.05243  | YES | YES |
| 32 | a | 924.36  | 1.80516  | YES | YES |
| 33 | a | 966.15  | 0.08686  | YES | YES |
| 34 | a | 985.15  | 1.28647  | YES | YES |
| 35 | a | 988.72  | 0.37897  | YES | YES |
| 36 | a | 1012.20 | 1.04038  | YES | YES |
| 37 | a | 1049.81 | 28.60182 | YES | YES |
| 38 | a | 1071.68 | 3.13124  | YES | YES |
| 39 | a | 1154.73 | 0.24426  | YES | YES |
| 40 | a | 1170.81 | 6.86490  | YES | YES |
| 41 | a | 1293.13 | 1.17484  | YES | YES |
| 42 | a | 1334.38 | 5.16480  | YES | YES |
| 43 | a | 1428.52 | 13.79348 | YES | YES |
| 44 | a | 1455.59 | 0.75962  | YES | YES |
| 45 | a | 1561.89 | 0.59962  | YES | YES |
| 46 | a | 1566.92 | 18.50889 | YES | YES |
| 47 | a | 3103.77 | 0.50035  | YES | YES |
| 48 | a | 3113.81 | 5.93128  | YES | YES |
| 49 | a | 3120.53 | 2.04549  | YES | YES |
| 50 | a | 3127.55 | 3.09697  | YES | YES |

## [PhSe(PPh3)]<sup>+</sup>

bp86\_def2-tzvpp energy (au): -3670.0228676270

Zero point energy (au): 0.3568415

Entropy (kJ mol<sup>-1</sup>): 0.71987

Chemical potential (kJ mol<sup>-1</sup>): 787.04

XYZ coordinates:

46

|    |          |          |          |
|----|----------|----------|----------|
| C  | -1.20823 | 4.92910  | -1.18234 |
| H  | -1.51309 | 5.93814  | -1.45853 |
| C  | 2.98848  | -1.65694 | -1.68362 |
| H  | 3.47986  | -2.60241 | -1.45672 |
| Se | -1.84736 | -0.50881 | -0.19992 |
| P  | 0.08259  | 0.66903  | -0.01074 |
| C  | 2.71662  | 0.27866  | -3.11663 |
| H  | 2.99870  | 0.84438  | -4.00393 |
| C  | -1.61050 | 3.84154  | -1.96354 |
| H  | -2.22785 | 3.99930  | -2.84721 |
| C  | -0.43416 | 2.34115  | -0.46814 |
| C  | 2.00537  | -1.16861 | -0.82409 |
| H  | 1.73788  | -1.73328 | 0.06837  |
| C  | 1.64982  | 0.81614  | 4.31406  |
| H  | 2.01818  | 0.87136  | 5.33816  |
| C  | 1.37369  | 0.05650  | -1.11382 |
| C  | -0.63144 | -4.40349 | -1.17987 |
| H  | -0.47261 | -4.97238 | -2.09563 |
| C  | -1.22816 | 2.54714  | -1.61274 |
| H  | -1.54994 | 1.70258  | -2.22209 |
| C  | 0.70594  | 0.66275  | 1.68881  |
| C  | 0.27628  | 0.71284  | 4.07182  |
| H  | -0.42681 | 0.68948  | 4.90375  |
| C  | 1.73015  | 0.77859  | -2.26604 |
| H  | 1.25151  | 1.73055  | -2.49116 |
| C  | 3.34358  | -0.93631 | -2.82813 |
| H  | 4.11472  | -1.32149 | -3.49481 |
| C  | -0.03368 | 3.43541  | 0.31789  |
| H  | 0.57220  | 3.28207  | 1.20985  |
| C  | 2.08705  | 0.77071  | 1.93291  |
| H  | 2.79499  | 0.79667  | 1.10562  |
| C  | -0.19967 | 0.63476  | 2.76357  |
| H  | -1.27000 | 0.54791  | 2.57480  |
| C  | -1.07048 | -2.94670 | 1.17591  |
| H  | -1.26192 | -2.38444 | 2.08861  |
| C  | -0.42177 | 4.72545  | -0.04570 |
| H  | -0.11186 | 5.57223  | 0.56565  |
| C  | 2.55149  | 0.84621  | 3.24717  |
| H  | 3.62158  | 0.92723  | 3.43520  |
| C  | -0.70131 | -4.29245 | 1.24056  |
| H  | -0.59713 | -4.77568 | 2.21173  |
| C  | -0.99262 | -3.05612 | -1.25937 |
| H  | -1.11655 | -2.57420 | -2.22813 |
| C  | -0.48321 | -5.01895 | 0.06603  |

|   |          |          |          |
|---|----------|----------|----------|
| H | -0.20642 | -6.07139 | 0.12256  |
| C | -1.20591 | -2.33600 | -0.07722 |

Vibrational Spectrum (first 50 lines):

| #  | mode | symmetry | wave number | IR intensity | selection rules |
|----|------|----------|-------------|--------------|-----------------|
| #  |      | cm**(-1) | km/mol      | IR           | RAMAN           |
| 1  |      | 0.00     | 0.00000     | -            | -               |
| 2  |      | 0.00     | 0.00000     | -            | -               |
| 3  |      | 0.00     | 0.00000     | -            | -               |
| 4  |      | 0.00     | 0.00000     | -            | -               |
| 5  |      | 0.00     | 0.00000     | -            | -               |
| 6  |      | 0.00     | 0.00000     | -            | -               |
| 7  | a    | 16.58    | 0.10660     | YES          | YES             |
| 8  | a    | 26.84    | 0.01915     | YES          | YES             |
| 9  | a    | 30.67    | 0.06919     | YES          | YES             |
| 10 | a    | 38.15    | 0.00943     | YES          | YES             |
| 11 | a    | 45.23    | 0.19370     | YES          | YES             |
| 12 | a    | 46.74    | 0.09141     | YES          | YES             |
| 13 | a    | 55.24    | 0.10087     | YES          | YES             |
| 14 | a    | 58.06    | 0.09766     | YES          | YES             |
| 15 | a    | 70.34    | 0.33184     | YES          | YES             |
| 16 | a    | 87.69    | 0.39030     | YES          | YES             |
| 17 | a    | 98.52    | 0.57526     | YES          | YES             |
| 18 | a    | 175.47   | 0.98754     | YES          | YES             |
| 19 | a    | 184.89   | 2.07089     | YES          | YES             |
| 20 | a    | 204.20   | 1.32143     | YES          | YES             |
| 21 | a    | 208.57   | 0.21773     | YES          | YES             |
| 22 | a    | 229.10   | 0.91397     | YES          | YES             |
| 23 | a    | 237.47   | 0.02261     | YES          | YES             |
| 24 | a    | 241.47   | 1.43002     | YES          | YES             |
| 25 | a    | 254.94   | 0.35038     | YES          | YES             |
| 26 | a    | 267.74   | 0.26030     | YES          | YES             |
| 27 | a    | 296.80   | 1.91016     | YES          | YES             |
| 28 | a    | 388.50   | 0.06014     | YES          | YES             |
| 29 | a    | 389.94   | 0.01331     | YES          | YES             |
| 30 | a    | 396.14   | 0.39696     | YES          | YES             |
| 31 | a    | 397.35   | 0.09635     | YES          | YES             |
| 32 | a    | 416.18   | 7.03519     | YES          | YES             |
| 33 | a    | 435.57   | 7.64682     | YES          | YES             |
| 34 | a    | 441.01   | 8.21349     | YES          | YES             |
| 35 | a    | 461.56   | 6.62179     | YES          | YES             |
| 36 | a    | 492.67   | 54.06028    | YES          | YES             |
| 37 | a    | 504.65   | 72.00558    | YES          | YES             |
| 38 | a    | 519.86   | 79.98313    | YES          | YES             |
| 39 | a    | 605.35   | 0.00937     | YES          | YES             |
| 40 | a    | 608.27   | 0.25478     | YES          | YES             |
| 41 | a    | 608.65   | 0.16084     | YES          | YES             |
| 42 | a    | 609.23   | 0.11196     | YES          | YES             |
| 43 | a    | 660.42   | 2.25214     | YES          | YES             |
| 44 | a    | 678.15   | 5.43300     | YES          | YES             |
| 45 | a    | 686.33   | 15.02281    | YES          | YES             |
| 46 | a    | 686.84   | 47.99613    | YES          | YES             |
| 47 | a    | 687.97   | 20.68255    | YES          | YES             |
| 48 | a    | 689.33   | 11.82128    | YES          | YES             |
| 49 | a    | 710.42   | 24.81373    | YES          | YES             |
| 50 | a    | 711.10   | 27.60995    | YES          | YES             |

**[PhSe(PPh3).PPh3]+**

bp86\_def2-tzvpp energy (au): -4706.6644284590

Zero point energy (au): 0.6230472

Entropy (kJ mol<sup>-1</sup>): 1.14774Chemical potential (kJ mol<sup>-1</sup>): 1408.09

XYZ coordinates:

80

|    |          |          |          |
|----|----------|----------|----------|
| C  | -4.76621 | 0.64976  | 3.29180  |
| H  | -5.83385 | 0.80756  | 3.44345  |
| C  | 2.75978  | 2.38463  | 4.07122  |
| H  | 3.84758  | 2.40708  | 4.00854  |
| Se | -0.13126 | -0.00253 | -0.01164 |
| P  | -0.23647 | 0.01286  | 2.60695  |
| C  | 0.68388  | 3.32787  | 4.87963  |
| H  | 0.14792  | 4.08516  | 5.45158  |
| C  | -4.05961 | 1.45982  | 2.39831  |
| H  | -4.57356 | 2.24995  | 1.85120  |
| C  | -2.01834 | 0.24359  | 2.90605  |
| C  | 2.05230  | 1.37672  | 3.41688  |
| H  | 2.59312  | 0.62181  | 2.84556  |
| C  | 0.88626  | -4.06001 | 4.49265  |
| H  | 1.14163  | -5.02624 | 4.92731  |
| C  | 0.64754  | 1.33094  | 3.50088  |
| C  | 3.90555  | 1.20021  | -0.22023 |
| H  | 4.44450  | 2.13106  | -0.39672 |
| C  | -2.69351 | 1.25633  | 2.19933  |
| H  | -2.14866 | 1.88883  | 1.49739  |
| C  | 0.23232  | -1.57286 | 3.37506  |
| C  | 0.23124  | -3.99902 | 3.25859  |
| H  | -0.02616 | -4.91653 | 2.72958  |
| C  | -0.03247 | 2.31717  | 4.23463  |
| H  | -1.11869 | 2.29185  | 4.31080  |
| C  | 2.07777  | 3.36352  | 4.80080  |
| H  | 2.63331  | 4.15217  | 5.30785  |
| C  | -2.73496 | -0.56840 | 3.80047  |
| H  | -2.22488 | -1.35855 | 4.35020  |
| C  | 0.88922  | -1.64012 | 4.61481  |
| H  | 1.14358  | -0.72614 | 5.15000  |
| C  | -0.08886 | -2.76292 | 2.69717  |
| H  | -0.59040 | -2.71866 | 1.72939  |
| C  | 2.51333  | -1.18747 | 0.22689  |
| H  | 1.97117  | -2.11755 | 0.39026  |
| C  | -4.10314 | -0.36314 | 3.98924  |
| H  | -4.65090 | -0.99614 | 4.68714  |
| C  | 1.21452  | -2.88141 | 5.16672  |
| H  | 1.72285  | -2.92497 | 6.12983  |
| C  | 3.91117  | -1.17600 | 0.24283  |
| H  | 4.45454  | -2.10285 | 0.42654  |
| C  | 2.50752  | 1.20160  | -0.22184 |
| H  | 1.96086  | 2.12796  | -0.39134 |
| C  | 4.60751  | 0.01461  | 0.01564  |
| H  | 5.69738  | 0.01857  | 0.02269  |
| C  | 1.81417  | 0.00453  | -0.00198 |



|   |          |          |          |
|---|----------|----------|----------|
| C | -4.73501 | -0.67924 | -3.33847 |
| H | -5.80010 | -0.84146 | -3.50267 |
| C | 2.80969  | -2.37239 | -4.03851 |
| H | 3.89783  | -2.37934 | -3.97854 |
| P | -0.21702 | -0.02077 | -2.60420 |
| C | 0.74438  | -3.35619 | -4.82574 |
| H | 0.21711  | -4.12970 | -5.38382 |
| C | -4.04038 | -1.47232 | -2.42081 |
| H | -4.56092 | -2.25392 | -1.86779 |
| C | -1.99444 | -0.26074 | -2.91922 |
| C | 2.09080  | -1.36324 | -3.39871 |
| H | 2.62310  | -0.59196 | -2.84144 |
| C | 0.90257  | 4.05449  | -4.48429 |
| H | 1.15617  | 5.02136  | -4.91852 |
| C | 0.68522  | -1.33778 | -3.47967 |
| C | -2.67762 | -1.26298 | -2.20534 |
| H | -2.14202 | -1.88219 | -1.48474 |
| C | 0.25294  | 1.56611  | -3.36798 |
| C | 0.23428  | 3.99218  | -3.25742 |
| H | -0.03487 | 4.90920  | -2.73346 |
| C | 0.01625  | -2.34491 | -4.19514 |
| H | -1.07043 | -2.33532 | -4.26852 |
| C | 2.13882  | -3.37186 | -4.75027 |
| H | 2.70355  | -4.16091 | -5.24639 |
| C | -2.69901 | 0.53444  | -3.83819 |
| H | -2.18243 | 1.31672  | -4.39314 |
| C | 0.92297  | 1.63445  | -4.60072 |
| H | 1.18902  | 0.72092  | -5.13104 |
| C | -0.08426 | 2.75547  | -2.69660 |
| H | -0.59660 | 2.70998  | -1.73456 |
| C | -4.06365 | 0.32270  | -4.04385 |
| H | -4.60218 | 0.94224  | -4.76071 |
| C | 1.24607  | 2.87662  | -5.15196 |
| H | 1.76480  | 2.92127  | -6.10943 |

Vibrational Spectrum (first 50 lines):

| #  | mode | symmetry | wave number | IR intensity | selection rules |
|----|------|----------|-------------|--------------|-----------------|
| #  |      | cm**(-1) | km/mol      | IR           | RAMAN           |
| 1  |      | 0.00     | 0.00000     | -            | -               |
| 2  |      | 0.00     | 0.00000     | -            | -               |
| 3  |      | 0.00     | 0.00000     | -            | -               |
| 4  |      | 0.00     | 0.00000     | -            | -               |
| 5  |      | 0.00     | 0.00000     | -            | -               |
| 6  |      | 0.00     | 0.00000     | -            | -               |
| 7  | a    | 6.08     | 0.09461     | YES          | YES             |
| 8  | a    | 11.11    | 7.19963     | YES          | YES             |
| 9  | a    | 14.27    | 10.06967    | YES          | YES             |
| 10 | a    | 15.53    | 0.59740     | YES          | YES             |
| 11 | a    | 21.56    | 9.82076     | YES          | YES             |
| 12 | a    | 22.77    | 0.05179     | YES          | YES             |
| 13 | a    | 28.23    | 32.26922    | YES          | YES             |
| 14 | a    | 34.67    | 0.04111     | YES          | YES             |
| 15 | a    | 35.61    | 0.03691     | YES          | YES             |
| 16 | a    | 37.34    | 0.42975     | YES          | YES             |
| 17 | a    | 38.37    | 7.88556     | YES          | YES             |
| 18 | a    | 42.68    | 7.57749     | YES          | YES             |

|    |   |        |          |     |     |
|----|---|--------|----------|-----|-----|
| 19 | a | 46.90  | 0.78206  | YES | YES |
| 20 | a | 51.60  | 7.43524  | YES | YES |
| 21 | a | 53.20  | 0.04919  | YES | YES |
| 22 | a | 55.09  | 0.02209  | YES | YES |
| 23 | a | 58.91  | 0.15273  | YES | YES |
| 24 | a | 60.55  | 21.75511 | YES | YES |
| 25 | a | 63.66  | 1.57883  | YES | YES |
| 26 | a | 66.30  | 1.60906  | YES | YES |
| 27 | a | 73.74  | 36.35131 | YES | YES |
| 28 | a | 93.98  | 0.05958  | YES | YES |
| 29 | a | 112.14 | 0.94481  | YES | YES |
| 30 | a | 113.25 | 0.21556  | YES | YES |
| 31 | a | 182.47 | 1.60086  | YES | YES |
| 32 | a | 182.96 | 1.07486  | YES | YES |
| 33 | a | 190.51 | 0.59545  | YES | YES |
| 34 | a | 191.49 | 4.55441  | YES | YES |
| 35 | a | 199.22 | 5.31814  | YES | YES |
| 36 | a | 201.28 | 0.64124  | YES | YES |
| 37 | a | 207.55 | 19.85077 | YES | YES |
| 38 | a | 235.96 | 6.04379  | YES | YES |
| 39 | a | 236.56 | 0.47257  | YES | YES |
| 40 | a | 237.77 | 0.36749  | YES | YES |
| 41 | a | 253.54 | 0.41535  | YES | YES |
| 42 | a | 253.77 | 0.98035  | YES | YES |
| 43 | a | 259.26 | 0.70527  | YES | YES |
| 44 | a | 260.54 | 0.43216  | YES | YES |
| 45 | a | 299.20 | 0.35002  | YES | YES |
| 46 | a | 388.46 | 0.63715  | YES | YES |
| 47 | a | 389.46 | 0.13005  | YES | YES |
| 48 | a | 389.97 | 0.99158  | YES | YES |
| 49 | a | 390.35 | 1.60349  | YES | YES |
| 50 | a | 390.78 | 0.40697  | YES | YES |

**[PhSe(PtBu3).PPh3]+**

bp86\_def2-tzvpp energy (au): -4485.1440918810

Zero point energy (au): 0.7146552

Entropy (kJ mol<sup>-1</sup>): 1.11891

Chemical potential (kJ mol<sup>-1</sup>): 1662.71

XYZ coordinates:

86

|    |          |          |          |
|----|----------|----------|----------|
| P  | -2.15882 | 0.34286  | -0.04329 |
| Se | 0.34435  | 0.08567  | -0.00482 |
| C  | 0.20386  | -1.85775 | 0.05758  |
| C  | -0.02527 | -2.57529 | -1.12426 |
| H  | -0.10638 | -2.05067 | -2.07528 |
| C  | -0.15353 | -3.96662 | -1.07755 |
| H  | -0.33431 | -4.52155 | -1.99813 |
| C  | -0.04242 | -4.64229 | 0.14104  |
| H  | -0.13451 | -5.72773 | 0.17318  |
| C  | 0.18500  | -3.92398 | 1.31786  |
| H  | 0.26588  | -4.44538 | 2.27166  |
| C  | 0.30037  | -2.53108 | 1.28145  |
| H  | 0.45668  | -1.97274 | 2.20262  |
| C  | -3.12345 | -0.51839 | 1.23499  |
| C  | -3.19538 | -1.92452 | 1.20063  |
| H  | -2.70155 | -2.48176 | 0.40445  |
| C  | -3.90953 | -2.61083 | 2.18205  |
| H  | -3.96849 | -3.69828 | 2.14283  |
| C  | -4.54491 | -1.90929 | 3.21134  |
| H  | -5.10044 | -2.44950 | 3.97760  |
| C  | -4.46929 | -0.51534 | 3.25416  |
| H  | -4.96853 | 0.03645  | 4.05036  |
| C  | -3.76278 | 0.18187  | 2.27219  |
| H  | -3.72078 | 1.26956  | 2.30758  |
| C  | -2.35405 | 2.13422  | 0.20910  |
| C  | -3.18065 | 2.90769  | -0.62239 |
| H  | -3.72642 | 2.43918  | -1.44042 |
| C  | -3.30542 | 4.28062  | -0.40118 |
| H  | -3.94970 | 4.87356  | -1.04994 |
| C  | -2.61163 | 4.89092  | 0.64660  |
| H  | -2.71305 | 5.96260  | 0.81643  |
| C  | -1.78650 | 4.12669  | 1.47669  |
| H  | -1.24516 | 4.59959  | 2.29584  |
| C  | -1.65111 | 2.75503  | 1.25865  |
| H  | -1.00397 | 2.16367  | 1.90735  |
| C  | -2.89427 | -0.06370 | -1.65893 |
| C  | -4.18822 | -0.60048 | -1.76981 |
| H  | -4.77541 | -0.80627 | -0.87585 |
| C  | -4.72675 | -0.86734 | -3.03047 |
| H  | -5.73115 | -1.28295 | -3.10885 |
| C  | -3.98584 | -0.59922 | -4.18403 |
| H  | -4.41030 | -0.80917 | -5.16557 |
| C  | -2.69891 | -0.06252 | -4.07881 |
| H  | -2.11871 | 0.14829  | -4.97697 |
| C  | -2.15067 | 0.19975  | -2.82327 |

|   |          |          |          |
|---|----------|----------|----------|
| H | -1.14271 | 0.60856  | -2.74284 |
| P | 3.18205  | 0.27481  | 0.02282  |
| C | 3.49828  | 1.80056  | -1.12679 |
| C | 4.84769  | 2.50657  | -0.89474 |
| H | 4.94587  | 3.31886  | -1.63208 |
| C | 2.35464  | 2.82103  | -0.92767 |
| H | 2.52345  | 3.66014  | -1.61984 |
| H | 2.30508  | 3.23696  | 0.08166  |
| H | 1.37696  | 2.38781  | -1.17515 |
| C | 3.67418  | 0.72401  | 1.84017  |
| C | 5.18966  | 0.71803  | 2.11564  |
| H | 5.35455  | 1.02987  | 3.15896  |
| H | 5.73993  | 1.41591  | 1.47490  |
| H | 5.63514  | -0.27670 | 2.00501  |
| H | 3.29646  | -1.31269 | 2.64312  |
| H | 1.88582  | -0.22907 | 2.67251  |
| H | 3.21687  | 0.00315  | 3.82310  |
| C | 3.11217  | 2.11232  | 2.20700  |
| H | 2.03317  | 2.18367  | 2.01715  |
| H | 3.61959  | 2.93385  | 1.69066  |
| H | 3.26584  | 2.26414  | 3.28622  |
| C | 4.23646  | -1.22964 | -0.58963 |
| C | 4.23825  | -2.32730 | 0.49344  |
| H | 4.71219  | -3.22300 | 0.06428  |
| H | 3.22266  | -2.60982 | 0.79907  |
| H | 4.81537  | -2.05356 | 1.38301  |
| C | 5.69363  | -0.88627 | -0.95160 |
| H | 6.25055  | -0.44993 | -0.11536 |
| H | 5.76599  | -0.20686 | -1.80821 |
| H | 6.20642  | -1.81830 | -1.23713 |
| C | 3.53884  | -1.84121 | -1.82400 |
| H | 3.53290  | -1.17996 | -2.69410 |
| H | 2.50631  | -2.13373 | -1.60061 |
| H | 4.08718  | -2.75225 | -2.10865 |
| H | 4.91875  | 2.96538  | 0.09773  |
| H | 5.70558  | 1.83873  | -1.02773 |
| C | 3.41899  | 1.35769  | -2.60171 |
| H | 3.42853  | 2.26249  | -3.22820 |
| H | 4.27074  | 0.74313  | -2.91150 |
| H | 2.49010  | 0.81510  | -2.82120 |
| C | 2.97646  | -0.27721 | 2.78621  |

Vibrational Spectrum (first 50 lines):

| #  | mode | symmetry | wave number | IR intensity | selection rules |
|----|------|----------|-------------|--------------|-----------------|
| #  |      |          | cm**(-1)    | km/mol       | IR RAMAN        |
| 1  |      |          | 0.00        | 0.00000      | - -             |
| 2  |      |          | 0.00        | 0.00000      | - -             |
| 3  |      |          | 0.00        | 0.00000      | - -             |
| 4  |      |          | 0.00        | 0.00000      | - -             |
| 5  |      |          | 0.00        | 0.00000      | - -             |
| 6  |      |          | 0.00        | 0.00000      | - -             |
| 7  | a    |          | 7.49        | 0.14336      | YES YES         |
| 8  | a    |          | 13.21       | 0.20366      | YES YES         |
| 9  | a    |          | 18.54       | 5.56232      | YES YES         |
| 10 | a    |          | 21.98       | 0.37869      | YES YES         |
| 11 | a    |          | 30.74       | 63.26513     | YES YES         |

|    |   |        |          |     |     |
|----|---|--------|----------|-----|-----|
| 12 | a | 37.50  | 0.20351  | YES | YES |
| 13 | a | 39.21  | 1.76727  | YES | YES |
| 14 | a | 41.15  | 0.89197  | YES | YES |
| 15 | a | 44.58  | 0.11908  | YES | YES |
| 16 | a | 50.94  | 0.20297  | YES | YES |
| 17 | a | 54.44  | 2.52867  | YES | YES |
| 18 | a | 57.65  | 0.33141  | YES | YES |
| 19 | a | 63.77  | 0.07562  | YES | YES |
| 20 | a | 67.80  | 2.15376  | YES | YES |
| 21 | a | 73.04  | 0.04869  | YES | YES |
| 22 | a | 90.87  | 0.04077  | YES | YES |
| 23 | a | 96.06  | 1.08575  | YES | YES |
| 24 | a | 105.20 | 10.42144 | YES | YES |
| 25 | a | 109.06 | 22.14297 | YES | YES |
| 26 | a | 114.87 | 1.52484  | YES | YES |
| 27 | a | 126.64 | 0.20277  | YES | YES |
| 28 | a | 176.13 | 0.02574  | YES | YES |
| 29 | a | 184.21 | 0.57548  | YES | YES |
| 30 | a | 184.81 | 0.84464  | YES | YES |
| 31 | a | 189.97 | 0.13719  | YES | YES |
| 32 | a | 193.50 | 1.10174  | YES | YES |
| 33 | a | 195.25 | 0.60379  | YES | YES |
| 34 | a | 199.45 | 6.73320  | YES | YES |
| 35 | a | 201.52 | 0.56508  | YES | YES |
| 36 | a | 205.51 | 0.75253  | YES | YES |
| 37 | a | 210.59 | 16.69181 | YES | YES |
| 38 | a | 230.78 | 0.18022  | YES | YES |
| 39 | a | 235.60 | 3.02244  | YES | YES |
| 40 | a | 237.44 | 1.48011  | YES | YES |
| 41 | a | 238.16 | 0.19746  | YES | YES |
| 42 | a | 244.27 | 0.14446  | YES | YES |
| 43 | a | 251.53 | 0.27531  | YES | YES |
| 44 | a | 253.63 | 0.66988  | YES | YES |
| 45 | a | 254.52 | 0.09107  | YES | YES |
| 46 | a | 261.85 | 0.60123  | YES | YES |
| 47 | a | 264.56 | 0.39711  | YES | YES |
| 48 | a | 272.99 | 0.07882  | YES | YES |
| 49 | a | 276.16 | 0.05550  | YES | YES |
| 50 | a | 284.14 | 0.61775  | YES | YES |

**[PhSe(PPh3).PtBu3]+\_iso1**

bp86\_def2-tzvpp energy (au): -4485.1440996000

Zero point energy (au): 0.7146910

Entropy (kJ mol<sup>-1</sup>): 1.11661

Chemical potential (kJ mol<sup>-1</sup>): 1663.44

XYZ coordinates:

86

|    |          |          |          |
|----|----------|----------|----------|
| P  | -2.14653 | 0.33823  | 0.00679  |
| Se | 0.36088  | 0.08042  | 0.00094  |
| C  | 0.21724  | -1.86383 | -0.00150 |
| C  | -0.04095 | -2.53832 | -1.20255 |
| H  | -0.14010 | -1.98012 | -2.13248 |
| C  | -0.17568 | -3.92980 | -1.20203 |
| H  | -0.37971 | -4.45099 | -2.13734 |
| C  | -0.04148 | -4.64861 | -0.01074 |
| H  | -0.13891 | -5.73407 | -0.01471 |
| C  | 0.21606  | -3.97335 | 1.18519  |
| H  | 0.31539  | -4.52845 | 2.11801  |
| C  | 0.33744  | -2.58049 | 1.19536  |
| H  | 0.51706  | -2.05612 | 2.13212  |
| C  | -3.09174 | -0.56662 | 1.26944  |
| C  | -3.16050 | -1.97110 | 1.19048  |
| H  | -2.67663 | -2.50069 | 0.36968  |
| C  | -3.85861 | -2.69112 | 2.15921  |
| H  | -3.91523 | -3.77691 | 2.08554  |
| C  | -4.48085 | -2.02531 | 3.21978  |
| H  | -5.02374 | -2.59182 | 3.97604  |
| C  | -4.40835 | -0.63327 | 3.30669  |
| H  | -4.89750 | -0.10913 | 4.12745  |
| C  | -3.71796 | 0.09761  | 2.33782  |
| H  | -3.67820 | 1.18370  | 2.40796  |
| C  | -2.33972 | 2.11978  | 0.32295  |
| C  | -3.17926 | 2.92029  | -0.46908 |
| H  | -3.73670 | 2.47946  | -1.29461 |
| C  | -3.30213 | 4.28460  | -0.19882 |
| H  | -3.95651 | 4.89857  | -0.81721 |
| C  | -2.59367 | 4.85944  | 0.85916  |
| H  | -2.69372 | 5.92446  | 1.06742  |
| C  | -1.75567 | 4.06823  | 1.65017  |
| H  | -1.20290 | 4.51337  | 2.47722  |
| C  | -1.62207 | 2.70514  | 1.38283  |
| H  | -0.96500 | 2.09271  | 2.00131  |
| C  | -2.90675 | -0.01297 | -1.61051 |
| C  | -4.20042 | -0.55055 | -1.72046 |
| H  | -4.77267 | -0.79069 | -0.82537 |
| C  | -4.75801 | -0.77375 | -2.98133 |
| H  | -5.76215 | -1.19012 | -3.05887 |
| C  | -4.03653 | -0.46101 | -4.13594 |
| H  | -4.47592 | -0.63672 | -5.11764 |
| C  | -2.74985 | 0.07652  | -4.03162 |
| H  | -2.18471 | 0.32207  | -4.93057 |
| C  | -2.18259 | 0.29520  | -2.77618 |

|   |          |          |          |
|---|----------|----------|----------|
| H | -1.17485 | 0.70485  | -2.69695 |
| P | 3.19197  | 0.26482  | -0.00362 |
| C | 3.49242  | 1.82885  | -1.10473 |
| C | 4.84650  | 2.52469  | -0.86904 |
| H | 4.93497  | 3.36143  | -1.57975 |
| C | 2.35389  | 2.84343  | -0.85317 |
| H | 2.51443  | 3.70587  | -1.51807 |
| H | 2.31993  | 3.22402  | 0.17065  |
| H | 1.37177  | 2.42077  | -1.10132 |
| C | 3.71164  | 0.65064  | 1.82054  |
| C | 5.23117  | 0.63410  | 2.07231  |
| H | 5.41215  | 0.90943  | 3.12320  |
| H | 5.77241  | 1.35346  | 1.44787  |
| H | 5.67370  | -0.35651 | 1.92048  |
| H | 3.34509  | -1.41220 | 2.55892  |
| H | 1.93535  | -0.33032 | 2.64590  |
| H | 3.28321  | -0.13735 | 3.78418  |
| C | 3.15687  | 2.02583  | 2.24354  |
| H | 2.07506  | 2.10413  | 2.07351  |
| H | 3.65690  | 2.86436  | 1.74773  |
| H | 3.32784  | 2.14038  | 3.32475  |
| C | 4.23368  | -1.21919 | -0.68371 |
| C | 4.25094  | -2.35319 | 0.36107  |
| H | 4.71718  | -3.23392 | -0.10585 |
| H | 3.23991  | -2.64546 | 0.67253  |
| H | 4.84213  | -2.11036 | 1.25039  |
| C | 5.68555  | -0.86490 | -1.05637 |
| H | 6.25605  | -0.45813 | -0.21438 |
| H | 5.74564  | -0.15661 | -1.89022 |
| H | 6.19230  | -1.78718 | -1.38160 |
| C | 3.51583  | -1.78728 | -1.92723 |
| H | 3.49720  | -1.09648 | -2.77387 |
| H | 2.48653  | -2.08648 | -1.69790 |
| H | 4.05848  | -2.68842 | -2.25151 |
| H | 4.93314  | 2.94942  | 0.13726  |
| H | 5.70110  | 1.86066  | -1.03755 |
| C | 3.38994  | 1.43698  | -2.59259 |
| H | 3.39149  | 2.36282  | -3.18759 |
| H | 4.23582  | 0.83246  | -2.93627 |
| H | 2.45689  | 0.90338  | -2.81635 |
| C | 3.02750  | -0.38226 | 2.74200  |

Vibrational Spectrum (first 50 lines):

| #  | mode | symmetry | wave number | IR intensity | selection rules |
|----|------|----------|-------------|--------------|-----------------|
| #  |      | cm**(-1) | km/mol      | IR           | RAMAN           |
| 1  |      | 0.00     | 0.00000     | -            | -               |
| 2  |      | 0.00     | 0.00000     | -            | -               |
| 3  |      | 0.00     | 0.00000     | -            | -               |
| 4  |      | 0.00     | 0.00000     | -            | -               |
| 5  |      | 0.00     | 0.00000     | -            | -               |
| 6  |      | 0.00     | 0.00000     | -            | -               |
| 7  | a    | 8.87     | 0.71784     | YES          | YES             |
| 8  | a    | 13.42    | 0.70158     | YES          | YES             |
| 9  | a    | 18.74    | 4.59345     | YES          | YES             |
| 10 | a    | 22.42    | 0.08849     | YES          | YES             |
| 11 | a    | 30.73    | 64.32789    | YES          | YES             |

|    |   |        |          |     |     |
|----|---|--------|----------|-----|-----|
| 12 | a | 37.59  | 0.28542  | YES | YES |
| 13 | a | 39.52  | 2.55588  | YES | YES |
| 14 | a | 41.41  | 0.39700  | YES | YES |
| 15 | a | 44.57  | 0.09361  | YES | YES |
| 16 | a | 51.14  | 0.18361  | YES | YES |
| 17 | a | 54.71  | 2.53213  | YES | YES |
| 18 | a | 57.73  | 0.28712  | YES | YES |
| 19 | a | 63.84  | 0.06367  | YES | YES |
| 20 | a | 68.17  | 2.13936  | YES | YES |
| 21 | a | 73.32  | 0.07012  | YES | YES |
| 22 | a | 91.07  | 0.03359  | YES | YES |
| 23 | a | 95.98  | 1.18819  | YES | YES |
| 24 | a | 105.37 | 13.19014 | YES | YES |
| 25 | a | 108.82 | 18.73286 | YES | YES |
| 26 | a | 115.06 | 1.25645  | YES | YES |
| 27 | a | 127.29 | 0.26014  | YES | YES |
| 28 | a | 176.94 | 0.02229  | YES | YES |
| 29 | a | 184.15 | 0.53105  | YES | YES |
| 30 | a | 184.76 | 0.90187  | YES | YES |
| 31 | a | 189.91 | 0.14173  | YES | YES |
| 32 | a | 193.66 | 1.12041  | YES | YES |
| 33 | a | 195.01 | 0.59321  | YES | YES |
| 34 | a | 199.35 | 5.99257  | YES | YES |
| 35 | a | 201.08 | 0.81379  | YES | YES |
| 36 | a | 205.28 | 0.70415  | YES | YES |
| 37 | a | 210.75 | 17.27589 | YES | YES |
| 38 | a | 231.93 | 0.19008  | YES | YES |
| 39 | a | 235.82 | 3.16165  | YES | YES |
| 40 | a | 237.40 | 1.36021  | YES | YES |
| 41 | a | 238.90 | 0.22666  | YES | YES |
| 42 | a | 243.91 | 0.11613  | YES | YES |
| 43 | a | 251.51 | 0.30857  | YES | YES |
| 44 | a | 253.56 | 0.63929  | YES | YES |
| 45 | a | 254.40 | 0.10936  | YES | YES |
| 46 | a | 261.73 | 0.59384  | YES | YES |
| 47 | a | 264.95 | 0.40537  | YES | YES |
| 48 | a | 273.42 | 0.09159  | YES | YES |
| 49 | a | 276.48 | 0.04289  | YES | YES |
| 50 | a | 284.61 | 0.57559  | YES | YES |



**[PhSe(PtBu3)]+**

bp86\_def2-tzvpp energy (au): -3448.5054806150

Zero point energy (au): 0.4482169

Entropy (kJ mol<sup>-1</sup>): 0.70513

Chemical potential (kJ mol<sup>-1</sup>): 1037.42

XYZ coordinates:

52

|   |          |          |          |
|---|----------|----------|----------|
| P | 1.14252  | 0.12348  | -0.13668 |
| C | -4.91912 | 0.42786  | -0.33685 |
| H | -5.94275 | 0.70392  | -0.58779 |
| C | 1.68349  | 1.58059  | 1.01053  |
| C | -2.85084 | 0.89643  | 0.83864  |
| H | -2.28058 | 1.52333  | 1.52011  |
| C | 2.32774  | 1.02630  | 2.29682  |
| H | 2.50026  | 1.87948  | 2.96890  |
| H | 3.29845  | 0.54987  | 2.12707  |
| H | 1.66597  | 0.32846  | 2.82570  |
| C | -4.16006 | 1.24932  | 0.50120  |
| H | -4.59112 | 2.16231  | 0.91126  |
| C | 2.14997  | -2.28119 | -1.30670 |
| H | 2.85976  | -3.11607 | -1.21371 |
| H | 2.28038  | -1.85965 | -2.30874 |
| H | 1.14008  | -2.69900 | -1.21532 |
| C | -2.29855 | -0.27612 | 0.30964  |
| C | 2.47330  | -1.27979 | -0.18047 |
| C | -3.05878 | -1.11224 | -0.52004 |
| H | -2.63699 | -2.04184 | -0.90021 |
| C | -0.19844 | 2.00938  | -1.80666 |
| H | -0.51956 | 2.26116  | -2.82795 |
| H | 0.35907  | 2.87068  | -1.42461 |
| H | -1.10503 | 1.86812  | -1.20672 |
| C | 3.88209  | -0.69608 | -0.41130 |
| H | 4.57954  | -1.54276 | -0.49375 |
| H | 4.22902  | -0.07652 | 0.42248  |
| H | 3.96344  | -0.11783 | -1.33747 |
| C | -0.19438 | -0.33843 | -2.62165 |
| H | -1.13890 | -0.53073 | -2.10421 |
| H | 0.32647  | -1.28665 | -2.77188 |
| H | -0.44011 | 0.06264  | -3.61590 |
| C | 0.44373  | 2.38033  | 1.45508  |
| H | 0.79627  | 3.21015  | 2.08462  |
| H | -0.22167 | 1.76264  | 2.06983  |
| H | -0.12858 | 2.81322  | 0.63056  |
| C | 2.68109  | 2.51930  | 0.30184  |
| H | 2.22985  | 3.06394  | -0.53440 |
| H | 3.57961  | 2.00530  | -0.05650 |
| H | 3.00750  | 3.27077  | 1.03548  |
| C | 0.65397  | 0.72800  | -1.90161 |
| C | 2.46053  | -2.07690 | 1.14300  |
| H | 1.51206  | -2.60520 | 1.30002  |
| H | 2.68360  | -1.47672 | 2.02767  |
| H | 3.24245  | -2.84658 | 1.06252  |

|    |          |          |          |
|----|----------|----------|----------|
| C  | 1.91740  | 1.02066  | -2.73712 |
| H  | 1.58179  | 1.43076  | -3.70115 |
| H  | 2.49712  | 0.11808  | -2.95782 |
| H  | 2.57938  | 1.76419  | -2.28144 |
| C  | -4.37160 | -0.75507 | -0.83873 |
| H  | -4.96536 | -1.40895 | -1.47695 |
| Se | -0.58164 | -0.97295 | 0.91399  |

Vibrational Spectrum (first 50 lines):

| #  | mode | symmetry             | wave number | IR intensity | selection rules |
|----|------|----------------------|-------------|--------------|-----------------|
| #  |      | cm <sup>**(-1)</sup> | km/mol      | IR           | RAMAN           |
| 1  |      | 0.00                 | 0.00000     | -            | -               |
| 2  |      | 0.00                 | 0.00000     | -            | -               |
| 3  |      | 0.00                 | 0.00000     | -            | -               |
| 4  |      | 0.00                 | 0.00000     | -            | -               |
| 5  |      | 0.00                 | 0.00000     | -            | -               |
| 6  |      | 0.00                 | 0.00000     | -            | -               |
| 7  | a    | 20.28                | 0.14930     | YES          | YES             |
| 8  | a    | 49.93                | 0.08310     | YES          | YES             |
| 9  | a    | 53.46                | 0.36533     | YES          | YES             |
| 10 | a    | 75.06                | 0.12615     | YES          | YES             |
| 11 | a    | 94.80                | 0.41808     | YES          | YES             |
| 12 | a    | 113.68               | 0.29365     | YES          | YES             |
| 13 | a    | 116.75               | 0.31896     | YES          | YES             |
| 14 | a    | 129.03               | 0.06919     | YES          | YES             |
| 15 | a    | 149.06               | 0.60830     | YES          | YES             |
| 16 | a    | 158.66               | 0.04415     | YES          | YES             |
| 17 | a    | 185.62               | 0.99546     | YES          | YES             |
| 18 | a    | 191.75               | 0.51334     | YES          | YES             |
| 19 | a    | 195.27               | 0.90931     | YES          | YES             |
| 20 | a    | 202.58               | 0.17307     | YES          | YES             |
| 21 | a    | 204.85               | 0.54648     | YES          | YES             |
| 22 | a    | 219.37               | 0.05779     | YES          | YES             |
| 23 | a    | 226.16               | 0.35048     | YES          | YES             |
| 24 | a    | 231.77               | 0.42344     | YES          | YES             |
| 25 | a    | 240.98               | 0.23020     | YES          | YES             |
| 26 | a    | 249.72               | 0.23856     | YES          | YES             |
| 27 | a    | 252.74               | 0.34719     | YES          | YES             |
| 28 | a    | 257.28               | 0.06621     | YES          | YES             |
| 29 | a    | 272.15               | 0.12673     | YES          | YES             |
| 30 | a    | 276.89               | 0.06294     | YES          | YES             |
| 31 | a    | 281.00               | 0.28806     | YES          | YES             |
| 32 | a    | 286.46               | 0.07628     | YES          | YES             |
| 33 | a    | 299.42               | 1.82355     | YES          | YES             |
| 34 | a    | 314.23               | 0.29664     | YES          | YES             |
| 35 | a    | 336.26               | 0.43252     | YES          | YES             |
| 36 | a    | 341.65               | 0.47179     | YES          | YES             |
| 37 | a    | 361.10               | 0.94395     | YES          | YES             |
| 38 | a    | 369.93               | 0.31840     | YES          | YES             |
| 39 | a    | 373.84               | 0.33640     | YES          | YES             |
| 40 | a    | 396.22               | 0.40134     | YES          | YES             |
| 41 | a    | 397.27               | 0.29662     | YES          | YES             |
| 42 | a    | 400.67               | 0.67941     | YES          | YES             |
| 43 | a    | 405.11               | 0.93166     | YES          | YES             |
| 44 | a    | 452.44               | 11.03291    | YES          | YES             |
| 45 | a    | 453.65               | 9.21231     | YES          | YES             |

|    |   |        |          |     |     |
|----|---|--------|----------|-----|-----|
| 46 | a | 466.24 | 6.64555  | YES | YES |
| 47 | a | 487.66 | 28.29108 | YES | YES |
| 48 | a | 525.74 | 14.69404 | YES | YES |
| 49 | a | 556.95 | 5.12160  | YES | YES |
| 50 | a | 563.61 | 1.79411  | YES | YES |

**[PhS(PPh3)]+**

bp86\_def2-tzvpp energy (au): -1666.4330382650

Zero point energy (au): 0.3578356

Entropy (kJ mol<sup>-1</sup>): 0.71026

Chemical potential (kJ mol<sup>-1</sup>): 791.35

XYZ coordinates:

46

|   |          |          |          |
|---|----------|----------|----------|
| P | 0.12937  | 0.56504  | 0.03564  |
| S | 1.96395  | -0.46918 | 0.14549  |
| C | 1.50659  | -2.20016 | 0.04296  |
| C | 1.36348  | -2.81927 | -1.20707 |
| H | 1.46206  | -2.23686 | -2.12178 |
| C | 1.11138  | -4.19106 | -1.26540 |
| H | 1.00356  | -4.67787 | -2.23433 |
| C | 1.01632  | -4.93916 | -0.08788 |
| H | 0.83174  | -6.01179 | -0.13979 |
| C | 1.17150  | -4.31815 | 1.15451  |
| H | 1.10961  | -4.90300 | 2.07175  |
| C | 1.41556  | -2.94530 | 1.22735  |
| H | 1.54609  | -2.45563 | 2.19132  |
| C | -1.10448 | -0.10096 | 1.17052  |
| C | -1.72268 | -1.33299 | 0.88149  |
| H | -1.48044 | -1.87482 | -0.03224 |
| C | -2.65944 | -1.85902 | 1.76985  |
| H | -3.14022 | -2.81015 | 1.54373  |
| C | -2.98289 | -1.16833 | 2.94150  |
| H | -3.71943 | -1.58203 | 3.62989  |
| C | -2.36932 | 0.05337  | 3.22971  |
| H | -2.62666 | 0.59552  | 4.13901  |
| C | -1.42854 | 0.59019  | 2.35088  |
| H | -0.95974 | 1.54699  | 2.57666  |
| C | 0.60955  | 2.24529  | 0.49529  |
| C | 0.11057  | 3.33638  | -0.23719 |
| H | -0.54367 | 3.17414  | -1.09271 |
| C | 0.46327  | 4.63469  | 0.13214  |
| H | 0.07735  | 5.47934  | -0.43747 |
| C | 1.31233  | 4.84949  | 1.22087  |
| H | 1.58931  | 5.86529  | 1.50161  |
| C | 1.81299  | 3.76516  | 1.94771  |
| H | 2.47939  | 3.93234  | 2.79314  |
| C | 1.46600  | 2.46223  | 1.59163  |
| H | 1.86441  | 1.62046  | 2.15744  |
| C | -0.53663 | 0.55461  | -1.64548 |
| C | -1.92594 | 0.59716  | -1.85936 |
| H | -2.61641 | 0.57521  | -1.01733 |
| C | -2.42171 | 0.67044  | -3.16231 |
| H | -3.49826 | 0.70089  | -3.32718 |
| C | -1.54250 | 0.70299  | -4.24760 |
| H | -1.93465 | 0.75630  | -5.26292 |
| C | -0.16047 | 0.66603  | -4.03552 |
| H | 0.52468  | 0.69282  | -4.88212 |
| C | 0.34682  | 0.59192  | -2.73901 |

H 1.42399 0.56091 -2.57403

Vibrational Spectrum (first 50 lines):

| #  | mode | symmetry | wave number | IR intensity | selection rules |
|----|------|----------|-------------|--------------|-----------------|
| #  |      | cm**(-1) | km/mol      | IR           | RAMAN           |
| 1  |      | 0.00     | 0.00000     | -            | -               |
| 2  |      | 0.00     | 0.00000     | -            | -               |
| 3  |      | 0.00     | 0.00000     | -            | -               |
| 4  |      | 0.00     | 0.00000     | -            | -               |
| 5  |      | 0.00     | 0.00000     | -            | -               |
| 6  |      | 0.00     | 0.00000     | -            | -               |
| 7  | a    | 12.46    | 0.08012     | YES          | YES             |
| 8  | a    | 26.78    | 0.01150     | YES          | YES             |
| 9  | a    | 30.17    | 0.05791     | YES          | YES             |
| 10 | a    | 37.45    | 0.01996     | YES          | YES             |
| 11 | a    | 45.43    | 0.11446     | YES          | YES             |
| 12 | a    | 48.97    | 0.06635     | YES          | YES             |
| 13 | a    | 52.37    | 0.04437     | YES          | YES             |
| 14 | a    | 59.33    | 0.10381     | YES          | YES             |
| 15 | a    | 71.88    | 0.27208     | YES          | YES             |
| 16 | a    | 99.84    | 0.41980     | YES          | YES             |
| 17 | a    | 115.98   | 0.76749     | YES          | YES             |
| 18 | a    | 181.78   | 1.25005     | YES          | YES             |
| 19 | a    | 187.78   | 1.54191     | YES          | YES             |
| 20 | a    | 209.19   | 1.19405     | YES          | YES             |
| 21 | a    | 213.48   | 0.34342     | YES          | YES             |
| 22 | a    | 238.84   | 0.66435     | YES          | YES             |
| 23 | a    | 255.35   | 0.40394     | YES          | YES             |
| 24 | a    | 262.37   | 0.39225     | YES          | YES             |
| 25 | a    | 281.12   | 1.45515     | YES          | YES             |
| 26 | a    | 315.76   | 2.85484     | YES          | YES             |
| 27 | a    | 388.12   | 0.17207     | YES          | YES             |
| 28 | a    | 389.71   | 0.07659     | YES          | YES             |
| 29 | a    | 395.98   | 0.78423     | YES          | YES             |
| 30 | a    | 397.28   | 3.55608     | YES          | YES             |
| 31 | a    | 400.43   | 4.72162     | YES          | YES             |
| 32 | a    | 434.22   | 6.18343     | YES          | YES             |
| 33 | a    | 438.54   | 6.33447     | YES          | YES             |
| 34 | a    | 447.61   | 5.29078     | YES          | YES             |
| 35 | a    | 478.43   | 16.12966    | YES          | YES             |
| 36 | a    | 496.24   | 58.67422    | YES          | YES             |
| 37 | a    | 513.14   | 72.76973    | YES          | YES             |
| 38 | a    | 549.19   | 72.11901    | YES          | YES             |
| 39 | a    | 606.09   | 0.31747     | YES          | YES             |
| 40 | a    | 606.24   | 0.03151     | YES          | YES             |
| 41 | a    | 608.08   | 0.11865     | YES          | YES             |
| 42 | a    | 609.25   | 0.64579     | YES          | YES             |
| 43 | a    | 678.56   | 6.79028     | YES          | YES             |
| 44 | a    | 682.70   | 10.60311    | YES          | YES             |
| 45 | a    | 686.97   | 43.53009    | YES          | YES             |
| 46 | a    | 688.14   | 23.77483    | YES          | YES             |
| 47 | a    | 689.11   | 10.24141    | YES          | YES             |
| 48 | a    | 689.59   | 16.31962    | YES          | YES             |
| 49 | a    | 711.48   | 29.46269    | YES          | YES             |
| 50 | a    | 712.43   | 30.67794    | YES          | YES             |

**[PhS(PPh3).PPh3]+**

bp86\_def2-tzvpp energy (au): -2703.0676071170

Zero point energy (au): 0.6240249

Entropy (kJ mol<sup>-1</sup>): 1.14772

Chemical potential (kJ mol<sup>-1</sup>): 1409.32

XYZ coordinates:

80

|   |          |          |          |
|---|----------|----------|----------|
| C | -4.73516 | 0.55697  | 3.39294  |
| H | -5.80605 | 0.68369  | 3.55182  |
| C | 2.58798  | 2.67269  | 4.23300  |
| H | 3.63510  | 2.90799  | 4.04112  |
| S | -0.01114 | 0.08319  | -0.54092 |
| P | -0.17069 | 0.08952  | 2.64424  |
| C | 0.54774  | 3.04395  | 5.47621  |
| H | -0.00151 | 3.56824  | 6.25855  |
| C | -4.04976 | 1.40754  | 2.51998  |
| H | -4.58452 | 2.20054  | 1.99652  |
| C | -1.97001 | 0.23159  | 2.99096  |
| C | 1.94315  | 1.70099  | 3.46658  |
| H | 2.48946  | 1.18548  | 2.67461  |
| C | 1.05148  | -4.00687 | 4.47513  |
| H | 1.33612  | -4.97686 | 4.88259  |
| C | 0.59574  | 1.37670  | 3.70856  |
| C | 3.86778  | 1.34149  | -0.44662 |
| H | 4.41020  | 2.27870  | -0.56983 |
| C | -2.68010 | 1.23937  | 2.31263  |
| H | -2.15190 | 1.90231  | 1.62462  |
| C | 0.31455  | -1.50099 | 3.42814  |
| C | 0.35412  | -3.93106 | 3.26512  |
| H | 0.09188  | -4.84254 | 2.72718  |
| C | -0.09716 | 2.06193  | 4.71950  |
| H | -1.14290 | 1.82786  | 4.91744  |
| C | 1.88989  | 3.34920  | 5.23793  |
| H | 2.39043  | 4.11424  | 5.83140  |
| C | -2.66773 | -0.61729 | 3.86506  |
| H | -2.13553 | -1.40485 | 4.39805  |
| C | 1.01498  | -1.58841 | 4.64141  |
| H | 1.27220  | -0.68083 | 5.18689  |
| C | -0.00149 | -2.68798 | 2.74095  |
| H | -0.53947 | -2.63567 | 1.79215  |
| C | 2.46780  | -1.06127 | -0.11306 |
| H | 1.91703  | -1.99003 | 0.02703  |
| C | -4.04218 | -0.45552 | 4.06071  |
| H | -4.57053 | -1.11976 | 4.74507  |
| C | 1.38250  | -2.83446 | 5.15778  |
| H | 1.92460  | -2.88673 | 6.10225  |
| C | 3.85577  | -1.03171 | 0.03700  |
| H | 4.38830  | -1.94754 | 0.29219  |
| C | 2.47786  | 1.32577  | -0.58619 |
| H | 1.93668  | 2.24472  | -0.80518 |
| C | 4.55665  | 0.16542  | -0.13519 |
| H | 5.63995  | 0.18409  | -0.01772 |

|   |          |          |          |
|---|----------|----------|----------|
| C | 1.78159  | 0.11945  | -0.42832 |
| C | -4.73397 | -0.90359 | -3.16615 |
| H | -5.79577 | -1.11783 | -3.28555 |
| C | 2.87115  | -2.19251 | -4.18162 |
| H | 3.94987  | -2.07727 | -4.28241 |
| P | -0.24073 | -0.00852 | -2.67584 |
| C | 0.85903  | -3.50045 | -4.50837 |
| H | 0.36626  | -4.40318 | -4.86808 |
| C | -4.00153 | -1.54586 | -2.16406 |
| H | -4.48878 | -2.25879 | -1.49979 |
| C | -2.01103 | -0.34804 | -2.85587 |
| C | 2.12234  | -1.17262 | -3.59593 |
| H | 2.62119  | -0.27059 | -3.24308 |
| C | 0.56203  | 4.04238  | -4.72031 |
| H | 0.73303  | 5.00405  | -5.20353 |
| C | 0.72671  | -1.31434 | -3.46951 |
| C | -2.64247 | -1.27379 | -2.00493 |
| H | -2.07715 | -1.77408 | -1.21940 |
| C | 0.13103  | 1.57449  | -3.47681 |
| C | -0.00126 | 3.99456  | -3.44084 |
| H | -0.27123 | 4.91633  | -2.92632 |
| C | 0.09808  | -2.48607 | -3.92595 |
| H | -0.98135 | -2.60136 | -3.83803 |
| C | 2.24257  | -3.35564 | -4.63672 |
| H | 2.83265  | -4.14896 | -5.09500 |
| C | -2.75120 | 0.29957  | -3.85991 |
| H | -2.27181 | 1.02460  | -4.51648 |
| C | 0.69116  | 1.62445  | -4.76495 |
| H | 0.95609  | 0.70637  | -5.28744 |
| C | -0.21617 | 2.76678  | -2.81640 |
| H | -0.64917 | 2.73038  | -1.81642 |
| C | -4.10893 | 0.01648  | -4.01199 |
| H | -4.67958 | 0.52063  | -4.79127 |
| C | 0.90582  | 2.85992  | -5.37961 |
| H | 1.34224  | 2.89529  | -6.37736 |

Vibrational Spectrum (first 50 lines):

| #  | mode | symmetry | wave number | IR intensity | selection rules |
|----|------|----------|-------------|--------------|-----------------|
| #  |      | cm**(-1) | km/mol      | IR           | RAMAN           |
| 1  |      | 0.00     | 0.00000     | -            | -               |
| 2  |      | 0.00     | 0.00000     | -            | -               |
| 3  |      | 0.00     | 0.00000     | -            | -               |
| 4  |      | 0.00     | 0.00000     | -            | -               |
| 5  |      | 0.00     | 0.00000     | -            | -               |
| 6  |      | 0.00     | 0.00000     | -            | -               |
| 7  | a    | 4.07     | 0.00586     | YES          | YES             |
| 8  | a    | 6.87     | 0.01582     | YES          | YES             |
| 9  | a    | 10.71    | 0.10594     | YES          | YES             |
| 10 | a    | 17.64    | 0.13053     | YES          | YES             |
| 11 | a    | 22.33    | 5.73505     | YES          | YES             |
| 12 | a    | 24.19    | 0.02272     | YES          | YES             |
| 13 | a    | 25.13    | 0.99935     | YES          | YES             |
| 14 | a    | 26.87    | 0.21514     | YES          | YES             |
| 15 | a    | 29.08    | 0.66387     | YES          | YES             |
| 16 | a    | 36.54    | 0.41306     | YES          | YES             |
| 17 | a    | 38.01    | 0.12325     | YES          | YES             |

|    |   |        |          |     |     |
|----|---|--------|----------|-----|-----|
| 18 | a | 41.30  | 0.02575  | YES | YES |
| 19 | a | 46.25  | 0.68682  | YES | YES |
| 20 | a | 49.71  | 0.21586  | YES | YES |
| 21 | a | 53.64  | 0.08973  | YES | YES |
| 22 | a | 54.34  | 0.05006  | YES | YES |
| 23 | a | 55.00  | 0.29392  | YES | YES |
| 24 | a | 58.70  | 0.21482  | YES | YES |
| 25 | a | 60.85  | 1.34848  | YES | YES |
| 26 | a | 70.79  | 5.16112  | YES | YES |
| 27 | a | 74.09  | 5.91530  | YES | YES |
| 28 | a | 107.14 | 0.06376  | YES | YES |
| 29 | a | 127.31 | 1.47251  | YES | YES |
| 30 | a | 177.72 | 1.16053  | YES | YES |
| 31 | a | 183.79 | 8.24358  | YES | YES |
| 32 | a | 188.01 | 1.78363  | YES | YES |
| 33 | a | 191.10 | 1.33686  | YES | YES |
| 34 | a | 193.14 | 0.77269  | YES | YES |
| 35 | a | 207.83 | 1.24390  | YES | YES |
| 36 | a | 212.98 | 0.82082  | YES | YES |
| 37 | a | 235.80 | 5.21046  | YES | YES |
| 38 | a | 239.26 | 0.52625  | YES | YES |
| 39 | a | 251.68 | 0.44706  | YES | YES |
| 40 | a | 254.53 | 0.97703  | YES | YES |
| 41 | a | 254.59 | 0.46805  | YES | YES |
| 42 | a | 263.28 | 18.46716 | YES | YES |
| 43 | a | 272.06 | 57.44221 | YES | YES |
| 44 | a | 298.06 | 33.09583 | YES | YES |
| 45 | a | 387.94 | 3.70337  | YES | YES |
| 46 | a | 389.17 | 0.17042  | YES | YES |
| 47 | a | 390.12 | 0.78514  | YES | YES |
| 48 | a | 390.31 | 0.12286  | YES | YES |
| 49 | a | 390.51 | 0.67031  | YES | YES |
| 50 | a | 396.17 | 1.99477  | YES | YES |



**[PhS(PtBu3).PPh3]+**

bp86\_def2-tzvpp energy (au): -2481.5463992060

Zero point energy (au): 0.7154442

Entropy (kJ mol<sup>-1</sup>): 1.14184

Chemical potential (kJ mol<sup>-1</sup>): 1657.27

XYZ coordinates:

86

|   |          |          |          |
|---|----------|----------|----------|
| P | -2.27526 | 0.17958  | 0.05090  |
| S | 1.24688  | -0.23265 | 0.13212  |
| C | 0.99302  | -2.01436 | 0.11412  |
| C | 0.98288  | -2.75211 | -1.07638 |
| H | 1.21419  | -2.27444 | -2.02586 |
| C | 0.64039  | -4.10614 | -1.04900 |
| H | 0.63410  | -4.67650 | -1.97756 |
| C | 0.28782  | -4.71989 | 0.15552  |
| H | 0.01759  | -5.77537 | 0.17089  |
| C | 0.26313  | -3.97328 | 1.33672  |
| H | -0.03429 | -4.43940 | 2.27572  |
| C | 0.61126  | -2.62179 | 1.31986  |
| H | 0.56907  | -2.03205 | 2.23464  |
| C | -3.60146 | -0.68323 | 0.99492  |
| C | -3.54935 | -2.08837 | 1.03319  |
| H | -2.74463 | -2.61242 | 0.51385  |
| C | -4.51830 | -2.81852 | 1.72298  |
| H | -4.46994 | -3.90775 | 1.73641  |
| C | -5.54334 | -2.15414 | 2.40316  |
| H | -6.29585 | -2.72277 | 2.94950  |
| C | -5.59715 | -0.75846 | 2.38233  |
| H | -6.39480 | -0.23445 | 2.90959  |
| C | -4.63569 | -0.02596 | 1.68044  |
| H | -4.69214 | 1.06235  | 1.66641  |
| C | -2.46187 | 1.93818  | 0.57191  |
| C | -2.98746 | 2.94882  | -0.24814 |
| H | -3.35587 | 2.70297  | -1.24393 |
| C | -3.05104 | 4.27040  | 0.20532  |
| H | -3.46684 | 5.04220  | -0.44310 |
| C | -2.60018 | 4.60013  | 1.48502  |
| H | -2.66089 | 5.62900  | 1.83983  |
| C | -2.07527 | 3.60104  | 2.31183  |
| H | -1.72850 | 3.84827  | 3.31581  |
| C | -1.99554 | 2.28516  | 1.85451  |
| H | -1.58207 | 1.51212  | 2.50597  |
| C | -2.91311 | 0.17318  | -1.67830 |
| C | -4.24174 | -0.12457 | -2.02074 |
| H | -4.96507 | -0.35508 | -1.23874 |
| C | -4.64449 | -0.12953 | -3.35898 |
| H | -5.67931 | -0.36452 | -3.60937 |
| C | -3.73018 | 0.16937  | -4.37208 |
| H | -4.04782 | 0.16545  | -5.41476 |
| C | -2.40437 | 0.46678  | -4.04328 |
| H | -1.68515 | 0.69700  | -4.83002 |
| C | -1.99810 | 0.45731  | -2.70780 |

|   |          |          |          |
|---|----------|----------|----------|
| H | -0.95765 | 0.67262  | -2.45538 |
| P | 3.33086  | 0.26709  | 0.04651  |
| C | 4.10858  | -0.23116 | -1.65207 |
| C | 5.36901  | 0.60171  | -1.96645 |
| H | 5.78883  | 0.22004  | -2.90911 |
| C | 3.08177  | -0.02590 | -2.78467 |
| H | 3.51676  | -0.44603 | -3.70294 |
| H | 2.85904  | 1.02577  | -2.97911 |
| H | 2.13546  | -0.54134 | -2.59311 |
| C | 3.13643  | 2.18947  | 0.19584  |
| C | 4.48437  | 2.84931  | 0.55337  |
| H | 4.33251  | 3.93832  | 0.52707  |
| H | 5.28567  | 2.61656  | -0.15597 |
| H | 4.82413  | 2.59839  | 1.56390  |
| H | 2.32608  | 2.16605  | 2.26767  |
| H | 1.07881  | 2.25382  | 1.00662  |
| H | 2.09317  | 3.65871  | 1.34956  |
| C | 2.62797  | 2.78148  | -1.13497 |
| H | 1.69430  | 2.31673  | -1.47243 |
| H | 3.36921  | 2.73241  | -1.93920 |
| H | 2.41693  | 3.84566  | -0.95602 |
| C | 4.31730  | -0.46861 | 1.53261  |
| C | 3.82057  | 0.17108  | 2.84391  |
| H | 4.30114  | -0.36675 | 3.67401  |
| H | 2.73569  | 0.06895  | 2.96981  |
| H | 4.09552  | 1.22631  | 2.94109  |
| C | 5.83297  | -0.22415 | 1.38355  |
| H | 6.09772  | 0.83264  | 1.27566  |
| H | 6.26944  | -0.78451 | 0.54950  |
| H | 6.31604  | -0.58950 | 2.30202  |
| C | 4.06493  | -1.98585 | 1.65034  |
| H | 4.37763  | -2.55731 | 0.77349  |
| H | 3.01599  | -2.21510 | 1.85785  |
| H | 4.65758  | -2.34545 | 2.50452  |
| H | 5.14866  | 1.66327  | -2.12129 |
| H | 6.14990  | 0.51099  | -1.20428 |
| C | 4.49605  | -1.72447 | -1.63196 |
| H | 4.81949  | -1.99372 | -2.64795 |
| H | 5.33588  | -1.93629 | -0.96205 |
| H | 3.65644  | -2.37922 | -1.37075 |
| C | 2.09527  | 2.56130  | 1.27589  |

Vibrational Spectrum (first 50 lines):

| #  | mode | symmetry | wave number | IR intensity | selection rules |
|----|------|----------|-------------|--------------|-----------------|
| #  |      | cm**(-1) | km/mol      | IR           | RAMAN           |
| 1  |      | 0.00     | 0.00000     | -            | -               |
| 2  |      | 0.00     | 0.00000     | -            | -               |
| 3  |      | 0.00     | 0.00000     | -            | -               |
| 4  |      | 0.00     | 0.00000     | -            | -               |
| 5  |      | 0.00     | 0.00000     | -            | -               |
| 6  |      | 0.00     | 0.00000     | -            | -               |
| 7  | a    | 4.35     | 0.01350     | YES          | YES             |
| 8  | a    | 8.46     | 0.07543     | YES          | YES             |
| 9  | a    | 9.99     | 0.04772     | YES          | YES             |
| 10 | a    | 16.14    | 0.11935     | YES          | YES             |
| 11 | a    | 19.15    | 3.87376     | YES          | YES             |

|    |   |        |          |     |     |
|----|---|--------|----------|-----|-----|
| 12 | a | 24.96  | 0.42350  | YES | YES |
| 13 | a | 25.84  | 1.22058  | YES | YES |
| 14 | a | 29.54  | 0.28120  | YES | YES |
| 15 | a | 32.76  | 0.04359  | YES | YES |
| 16 | a | 45.08  | 0.54935  | YES | YES |
| 17 | a | 52.86  | 0.38263  | YES | YES |
| 18 | a | 55.83  | 0.23753  | YES | YES |
| 19 | a | 57.57  | 0.18437  | YES | YES |
| 20 | a | 62.98  | 0.28841  | YES | YES |
| 21 | a | 68.31  | 2.35611  | YES | YES |
| 22 | a | 93.25  | 0.29596  | YES | YES |
| 23 | a | 100.85 | 0.13579  | YES | YES |
| 24 | a | 120.88 | 0.19424  | YES | YES |
| 25 | a | 131.00 | 0.39607  | YES | YES |
| 26 | a | 133.10 | 0.60034  | YES | YES |
| 27 | a | 158.66 | 0.75302  | YES | YES |
| 28 | a | 174.49 | 1.82512  | YES | YES |
| 29 | a | 177.40 | 0.54318  | YES | YES |
| 30 | a | 182.20 | 0.57755  | YES | YES |
| 31 | a | 189.16 | 1.04403  | YES | YES |
| 32 | a | 193.79 | 0.26922  | YES | YES |
| 33 | a | 194.84 | 1.35703  | YES | YES |
| 34 | a | 200.52 | 0.92507  | YES | YES |
| 35 | a | 205.08 | 0.83241  | YES | YES |
| 36 | a | 210.33 | 0.61360  | YES | YES |
| 37 | a | 232.35 | 0.73814  | YES | YES |
| 38 | a | 236.49 | 2.79233  | YES | YES |
| 39 | a | 237.10 | 0.40677  | YES | YES |
| 40 | a | 240.59 | 2.71949  | YES | YES |
| 41 | a | 248.51 | 0.73225  | YES | YES |
| 42 | a | 249.27 | 0.44246  | YES | YES |
| 43 | a | 254.70 | 0.26708  | YES | YES |
| 44 | a | 256.12 | 0.37554  | YES | YES |
| 45 | a | 262.48 | 0.89015  | YES | YES |
| 46 | a | 273.84 | 1.51589  | YES | YES |
| 47 | a | 277.75 | 0.16660  | YES | YES |
| 48 | a | 280.34 | 0.43547  | YES | YES |
| 49 | a | 290.50 | 0.43518  | YES | YES |
| 50 | a | 300.18 | 13.45056 | YES | YES |

**[PhS(PPh3).PtBu3]+\_try4**

bp86\_def2-tzvpp energy (au): -2481.5471872580

Zero point energy (au): 0.7153606

Entropy (kJ mol<sup>-1</sup>): 1.11816

Chemical potential (kJ mol<sup>-1</sup>): 1663.56

XYZ coordinates:

86

|   |          |          |          |
|---|----------|----------|----------|
| P | -2.20246 | 0.32915  | 0.03148  |
| S | -0.07845 | 0.00606  | 0.01244  |
| C | -0.05006 | -1.78811 | -0.06757 |
| C | -0.16395 | -2.44491 | -1.30051 |
| H | -0.29421 | -1.86953 | -2.21562 |
| C | -0.09722 | -3.83944 | -1.34681 |
| H | -0.18450 | -4.35104 | -2.30509 |
| C | 0.09600  | -4.57355 | -0.17291 |
| H | 0.15709  | -5.66076 | -0.21487 |
| C | 0.22130  | -3.91348 | 1.05281  |
| H | 0.37981  | -4.48289 | 1.96837  |
| C | 0.14499  | -2.52031 | 1.11144  |
| H | 0.24077  | -2.00012 | 2.06332  |
| C | -3.10165 | -0.66001 | 1.24955  |
| C | -3.29027 | -2.03809 | 1.02651  |
| H | -2.92100 | -2.50661 | 0.11482  |
| C | -3.96019 | -2.80781 | 1.97649  |
| H | -4.10904 | -3.87222 | 1.79767  |
| C | -4.43811 | -2.21837 | 3.15091  |
| H | -4.96218 | -2.82450 | 3.88949  |
| C | -4.24860 | -0.85277 | 3.37658  |
| H | -4.62634 | -0.38975 | 4.28764  |
| C | -3.58200 | -0.07091 | 2.43243  |
| H | -3.44843 | 0.99516  | 2.61036  |
| C | -2.31727 | 2.08761  | 0.45038  |
| C | -3.21218 | 2.92037  | -0.24253 |
| H | -3.82362 | 2.52011  | -1.05019 |
| C | -3.31350 | 4.26867  | 0.10256  |
| H | -4.00745 | 4.91154  | -0.43796 |
| C | -2.52669 | 4.79172  | 1.13182  |
| H | -2.60692 | 5.84599  | 1.39565  |
| C | -1.63390 | 3.96634  | 1.82141  |
| H | -1.01785 | 4.37363  | 2.62241  |
| C | -1.52444 | 2.61665  | 1.48582  |
| H | -0.82411 | 1.97813  | 2.02371  |
| C | -2.94356 | 0.06772  | -1.60167 |
| C | -4.25995 | -0.40819 | -1.73253 |
| H | -4.84095 | -0.67377 | -0.85055 |
| C | -4.82692 | -0.53773 | -3.00199 |
| H | -5.84655 | -0.90916 | -3.09990 |
| C | -4.09236 | -0.19201 | -4.13880 |
| H | -4.53867 | -0.29674 | -5.12743 |
| C | -2.78502 | 0.28826  | -4.01045 |
| H | -2.21206 | 0.56062  | -4.89632 |
| C | -2.20764 | 0.41754  | -2.74796 |

|   |          |          |          |
|---|----------|----------|----------|
| H | -1.18650 | 0.78643  | -2.64903 |
| P | 3.30844  | 0.23273  | -0.02306 |
| C | 3.75042  | 1.34640  | -1.55053 |
| C | 5.05411  | 2.15907  | -1.45753 |
| H | 5.19741  | 2.71653  | -2.39748 |
| C | 2.56245  | 2.31092  | -1.77161 |
| H | 2.72999  | 2.86797  | -2.70697 |
| H | 2.44255  | 3.04642  | -0.97124 |
| H | 1.61827  | 1.75871  | -1.87266 |
| C | 3.68220  | 1.24083  | 1.59280  |
| C | 5.16240  | 1.39573  | 1.98458  |
| H | 5.23031  | 2.00933  | 2.89771  |
| H | 5.75108  | 1.89772  | 1.20841  |
| H | 5.64141  | 0.43583  | 2.20830  |
| H | 3.30646  | -0.44537 | 2.98806  |
| H | 1.84988  | 0.44747  | 2.50604  |
| H | 3.00613  | 1.16629  | 3.65129  |
| C | 3.06207  | 2.64731  | 1.46987  |
| H | 2.00481  | 2.60674  | 1.17370  |
| H | 3.59703  | 3.29265  | 0.76479  |
| H | 3.11189  | 3.13466  | 2.45633  |
| C | 4.46868  | -1.32312 | -0.04941 |
| C | 4.40319  | -2.02904 | 1.31993  |
| H | 4.91020  | -3.00234 | 1.23027  |
| H | 3.36847  | -2.22645 | 1.63120  |
| H | 4.91140  | -1.47383 | 2.11573  |
| C | 5.94630  | -1.07278 | -0.39936 |
| H | 6.43271  | -0.37962 | 0.29631  |
| H | 6.07846  | -0.68523 | -1.41599 |
| H | 6.49269  | -2.02850 | -0.34699 |
| C | 3.86527  | -2.32292 | -1.06234 |
| H | 3.91341  | -1.97565 | -2.09809 |
| H | 2.81724  | -2.54803 | -0.82465 |
| H | 4.43263  | -3.26527 | -1.00602 |
| H | 5.03313  | 2.89790  | -0.64809 |
| H | 5.93580  | 1.52391  | -1.31632 |
| C | 3.81084  | 0.46752  | -2.81625 |
| H | 3.86773  | 1.12935  | -3.69454 |
| H | 4.69137  | -0.18305 | -2.84596 |
| H | 2.91181  | -0.15371 | -2.92932 |
| C | 2.91802  | 0.54734  | 2.74433  |

Vibrational Spectrum (first 50 lines):

| #  | mode | symmetry | wave number | IR intensity | selection rules |
|----|------|----------|-------------|--------------|-----------------|
| #  |      | cm**(-1) | km/mol      | IR           | RAMAN           |
| 1  |      | 0.00     | 0.00000     | -            | -               |
| 2  |      | 0.00     | 0.00000     | -            | -               |
| 3  |      | 0.00     | 0.00000     | -            | -               |
| 4  |      | 0.00     | 0.00000     | -            | -               |
| 5  |      | 0.00     | 0.00000     | -            | -               |
| 6  |      | 0.00     | 0.00000     | -            | -               |
| 7  | a    | 3.97     | 0.00898     | YES          | YES             |
| 8  | a    | 12.13    | 0.00571     | YES          | YES             |
| 9  | a    | 19.84    | 0.71456     | YES          | YES             |
| 10 | a    | 22.00    | 0.04567     | YES          | YES             |
| 11 | a    | 27.41    | 7.40869     | YES          | YES             |

|    |   |        |          |     |     |
|----|---|--------|----------|-----|-----|
| 12 | a | 32.44  | 0.13688  | YES | YES |
| 13 | a | 34.77  | 0.44341  | YES | YES |
| 14 | a | 39.68  | 0.35710  | YES | YES |
| 15 | a | 40.56  | 0.12496  | YES | YES |
| 16 | a | 45.57  | 0.56837  | YES | YES |
| 17 | a | 51.32  | 0.22215  | YES | YES |
| 18 | a | 57.54  | 0.10053  | YES | YES |
| 19 | a | 59.80  | 0.08987  | YES | YES |
| 20 | a | 61.91  | 1.56206  | YES | YES |
| 21 | a | 73.81  | 0.53605  | YES | YES |
| 22 | a | 93.54  | 0.03900  | YES | YES |
| 23 | a | 95.07  | 0.08504  | YES | YES |
| 24 | a | 104.33 | 0.26428  | YES | YES |
| 25 | a | 125.54 | 0.09839  | YES | YES |
| 26 | a | 126.45 | 1.11983  | YES | YES |
| 27 | a | 172.15 | 0.61819  | YES | YES |
| 28 | a | 180.94 | 0.06703  | YES | YES |
| 29 | a | 182.96 | 0.51100  | YES | YES |
| 30 | a | 184.77 | 6.50689  | YES | YES |
| 31 | a | 189.64 | 1.36365  | YES | YES |
| 32 | a | 197.66 | 0.04326  | YES | YES |
| 33 | a | 198.57 | 0.08523  | YES | YES |
| 34 | a | 200.11 | 0.00540  | YES | YES |
| 35 | a | 207.46 | 1.29544  | YES | YES |
| 36 | a | 212.94 | 1.30664  | YES | YES |
| 37 | a | 236.02 | 0.14853  | YES | YES |
| 38 | a | 236.26 | 0.34395  | YES | YES |
| 39 | a | 237.09 | 0.17160  | YES | YES |
| 40 | a | 239.41 | 0.60537  | YES | YES |
| 41 | a | 254.79 | 1.07737  | YES | YES |
| 42 | a | 254.86 | 0.18315  | YES | YES |
| 43 | a | 255.41 | 0.22823  | YES | YES |
| 44 | a | 262.76 | 7.09013  | YES | YES |
| 45 | a | 263.21 | 9.85302  | YES | YES |
| 46 | a | 271.61 | 1.02194  | YES | YES |
| 47 | a | 272.77 | 38.19460 | YES | YES |
| 48 | a | 274.54 | 12.01168 | YES | YES |
| 49 | a | 283.33 | 0.05750  | YES | YES |
| 50 | a | 298.47 | 30.60146 | YES | YES |

**[PhS(PtBu3)]+**

bp86\_def2-tzvpp energy (au): -1444.9134141350

Zero point energy (au): 0.4491026

Entropy (kJ mol<sup>-1</sup>): 0.69253

Chemical potential (kJ mol<sup>-1</sup>): 1042.38

XYZ coordinates:

52

|   |          |          |          |
|---|----------|----------|----------|
| P | -0.98807 | 0.02122  | 0.01385  |
| C | 2.24120  | -0.64834 | 0.09867  |
| C | 4.34210  | -0.08241 | 1.16070  |
| H | 4.93293  | 0.05187  | 2.06629  |
| C | 4.91921  | 0.12472  | -0.09476 |
| H | 5.96290  | 0.42748  | -0.17174 |
| C | 4.16301  | -0.07665 | -1.25248 |
| H | 4.61652  | 0.05883  | -2.23394 |
| C | 2.82768  | -0.47520 | -1.16214 |
| H | 2.26073  | -0.67056 | -2.06979 |
| C | -0.86165 | 1.48828  | 1.25732  |
| C | -1.91394 | 2.57338  | 0.94976  |
| H | -1.84162 | 3.33279  | 1.74270  |
| C | 0.54474  | 2.12083  | 1.20648  |
| H | 0.54941  | 2.94838  | 1.93122  |
| H | 0.80879  | 2.53981  | 0.23317  |
| H | 1.32620  | 1.41724  | 1.50635  |
| C | -1.05599 | 0.61985  | -1.82077 |
| C | -2.46297 | 1.14117  | -2.18288 |
| H | -2.41483 | 1.52706  | -3.21167 |
| H | -2.79863 | 1.96464  | -1.54368 |
| H | -3.22429 | 0.35350  | -2.17240 |
| H | -1.42798 | -1.34126 | -2.78591 |
| H | 0.28527  | -0.97891 | -2.54145 |
| H | -0.63905 | -0.11968 | -3.78869 |
| C | -0.03477 | 1.75498  | -2.03967 |
| H | 0.98609  | 1.47071  | -1.75906 |
| H | -0.30561 | 2.67743  | -1.51602 |
| H | -0.02759 | 1.98543  | -3.11458 |
| C | -2.45614 | -1.17387 | 0.43621  |
| C | -2.70905 | -2.14905 | -0.73240 |
| H | -3.46441 | -2.87157 | -0.39208 |
| H | -1.81372 | -2.71918 | -1.00837 |
| H | -3.11455 | -1.65784 | -1.62265 |
| C | -3.74336 | -0.36619 | 0.70327  |
| H | -4.02807 | 0.28640  | -0.12877 |
| H | -3.68706 | 0.23150  | 1.61946  |
| H | -4.55966 | -1.08958 | 0.84351  |
| C | -2.13595 | -2.03482 | 1.67933  |
| H | -1.90861 | -1.45327 | 2.57552  |
| H | -1.31511 | -2.73756 | 1.50147  |
| H | -3.03566 | -2.63050 | 1.89165  |
| S | 0.60301  | -1.36246 | 0.30187  |
| C | 3.00470  | -0.46897 | 1.26305  |
| H | 2.55733  | -0.64722 | 2.24029  |

|   |          |          |          |
|---|----------|----------|----------|
| H | -1.72620 | 3.08632  | 0.00026  |
| H | -2.94233 | 2.19822  | 0.95184  |
| C | -1.06807 | 0.96292  | 2.69151  |
| H | -0.86149 | 1.79653  | 3.37823  |
| H | -2.09302 | 0.63138  | 2.88736  |
| H | -0.37314 | 0.15202  | 2.94070  |
| C | -0.68894 | -0.53647 | -2.77272 |

Vibrational Spectrum (first 50 lines):

| #  | mode | symmetry             | wave number | IR intensity | selection rules |
|----|------|----------------------|-------------|--------------|-----------------|
| #  |      | cm <sup>**(-1)</sup> | km/mol      | IR           | RAMAN           |
| 1  |      | 0.00                 | 0.00000     | -            | -               |
| 2  |      | 0.00                 | 0.00000     | -            | -               |
| 3  |      | 0.00                 | 0.00000     | -            | -               |
| 4  |      | 0.00                 | 0.00000     | -            | -               |
| 5  |      | 0.00                 | 0.00000     | -            | -               |
| 6  |      | 0.00                 | 0.00000     | -            | -               |
| 7  | a    | 21.32                | 0.09950     | YES          | YES             |
| 8  | a    | 52.33                | 0.06636     | YES          | YES             |
| 9  | a    | 53.98                | 0.05236     | YES          | YES             |
| 10 | a    | 80.03                | 0.45949     | YES          | YES             |
| 11 | a    | 98.79                | 0.14108     | YES          | YES             |
| 12 | a    | 118.98               | 0.10920     | YES          | YES             |
| 13 | a    | 127.13               | 0.21353     | YES          | YES             |
| 14 | a    | 128.95               | 0.72629     | YES          | YES             |
| 15 | a    | 162.84               | 0.06282     | YES          | YES             |
| 16 | a    | 168.72               | 0.28102     | YES          | YES             |
| 17 | a    | 181.69               | 0.35260     | YES          | YES             |
| 18 | a    | 191.44               | 0.28613     | YES          | YES             |
| 19 | a    | 200.21               | 1.22173     | YES          | YES             |
| 20 | a    | 203.60               | 0.23090     | YES          | YES             |
| 21 | a    | 207.69               | 1.02927     | YES          | YES             |
| 22 | a    | 215.00               | 0.83507     | YES          | YES             |
| 23 | a    | 237.34               | 0.93506     | YES          | YES             |
| 24 | a    | 246.85               | 0.21122     | YES          | YES             |
| 25 | a    | 252.15               | 0.46223     | YES          | YES             |
| 26 | a    | 254.04               | 0.01726     | YES          | YES             |
| 27 | a    | 263.39               | 0.18632     | YES          | YES             |
| 28 | a    | 270.85               | 0.50163     | YES          | YES             |
| 29 | a    | 276.90               | 0.44525     | YES          | YES             |
| 30 | a    | 286.17               | 0.15534     | YES          | YES             |
| 31 | a    | 296.58               | 0.03153     | YES          | YES             |
| 32 | a    | 308.10               | 0.22735     | YES          | YES             |
| 33 | a    | 319.57               | 0.36136     | YES          | YES             |
| 34 | a    | 327.70               | 0.13902     | YES          | YES             |
| 35 | a    | 341.48               | 0.36540     | YES          | YES             |
| 36 | a    | 359.54               | 1.27720     | YES          | YES             |
| 37 | a    | 371.20               | 0.45922     | YES          | YES             |
| 38 | a    | 375.07               | 0.44788     | YES          | YES             |
| 39 | a    | 392.23               | 0.57186     | YES          | YES             |
| 40 | a    | 396.27               | 1.89344     | YES          | YES             |
| 41 | a    | 400.69               | 0.98015     | YES          | YES             |
| 42 | a    | 404.38               | 0.57906     | YES          | YES             |
| 43 | a    | 414.03               | 4.76171     | YES          | YES             |
| 44 | a    | 452.13               | 12.00616    | YES          | YES             |
| 45 | a    | 455.85               | 9.53671     | YES          | YES             |



|    |   |        |          |     |     |
|----|---|--------|----------|-----|-----|
| 46 | a | 484.02 | 8.02157  | YES | YES |
| 47 | a | 502.98 | 9.50350  | YES | YES |
| 48 | a | 538.10 | 20.50810 | YES | YES |
| 49 | a | 562.89 | 5.86667  | YES | YES |
| 50 | a | 572.31 | 12.13008 | YES | YES |

## TS [PhS(PPh3)2]<sup>+</sup>

bp86\_def2-tzvpp energy (au): -2703.0643015890

Zero point energy (au): 0.6239692

Entropy (kJ mol<sup>-1</sup>): 1.10346

Chemical potential (kJ mol<sup>-1</sup>): 1420.07

XYZ coordinates:

80

|   |          |          |          |
|---|----------|----------|----------|
| C | -4.73210 | 0.43368  | 2.70878  |
| H | -5.80928 | 0.53559  | 2.83993  |
| C | 2.49683  | 2.72468  | 3.84398  |
| H | 3.55392  | 2.96262  | 3.72560  |
| S | -0.01600 | 0.08300  | -0.44100 |
| P | -0.14600 | 0.08900  | 2.14500  |
| C | 0.37004  | 3.10146  | 4.93224  |
| H | -0.23628 | 3.63146  | 5.66689  |
| C | -4.03986 | 1.32380  | 1.88265  |
| H | -4.57539 | 2.12048  | 1.36641  |
| C | -1.95449 | 0.17902  | 2.38635  |
| C | 1.91710  | 1.73648  | 3.04719  |
| H | 2.52529  | 1.21620  | 2.30654  |
| C | 1.16610  | -3.95983 | 3.98965  |
| H | 1.46934  | -4.91824 | 4.41073  |
| C | 0.55625  | 1.41202  | 3.19747  |
| C | 3.86202  | 1.34730  | -0.57760 |
| H | 4.39116  | 2.28645  | -0.73864 |
| C | -2.66025 | 1.19502  | 1.71572  |
| H | -2.12607 | 1.89545  | 1.07228  |
| C | 0.37903  | -1.48809 | 2.91005  |
| C | 0.43927  | -3.91713 | 2.79543  |
| H | 0.17332  | -4.84222 | 2.28378  |
| C | -0.21469 | 2.10744  | 4.14436  |
| H | -1.26971 | 1.86847  | 4.27238  |
| C | 1.72471  | 3.40995  | 4.78659  |
| H | 2.17808  | 4.18428  | 5.40529  |
| C | -2.65825 | -0.71363 | 3.21159  |
| H | -2.12583 | -1.50434 | 3.73889  |
| C | 1.11064  | -1.53977 | 4.10763  |
| H | 1.37017  | -0.61938 | 4.62904  |
| C | 0.05470  | -2.69049 | 2.25370  |
| H | -0.50856 | -2.66564 | 1.31967  |
| C | 2.49626  | -1.05977 | -0.16136 |
| H | 1.96106  | -1.99420 | -0.00047 |
| C | -4.04005 | -0.58458 | 3.36914  |
| H | -4.57482 | -1.27833 | 4.01794  |
| C | 1.50117  | -2.77088 | 4.64085  |
| H | 2.06402  | -2.79787 | 5.57395  |
| C | 3.89128  | -1.02613 | -0.10236 |
| H | 4.44295  | -1.94224 | 0.10775  |
| C | 2.46557  | 1.32559  | -0.62275 |
| H | 1.90746  | 2.24221  | -0.80726 |
| C | 4.57551  | 0.17434  | -0.31374 |
| H | 5.66421  | 0.19681  | -0.26903 |

|   |          |          |          |
|---|----------|----------|----------|
| C | 1.78069  | 0.11890  | -0.41814 |
| C | -4.76168 | -0.79360 | -3.07220 |
| H | -5.83336 | -0.97861 | -3.14282 |
| C | 2.78460  | -2.35511 | -4.24280 |
| H | 3.87171  | -2.30563 | -4.29906 |
| P | -0.22141 | -0.02258 | -2.74421 |
| C | 0.71017  | -3.52122 | -4.68389 |
| H | 0.17528  | -4.38015 | -5.08848 |
| C | -3.98685 | -1.51713 | -2.16180 |
| H | -4.45121 | -2.26402 | -1.51843 |
| C | -2.00670 | -0.31751 | -2.89330 |
| C | 2.07809  | -1.30984 | -3.64947 |
| H | 2.61880  | -0.45506 | -3.24336 |
| C | 0.67822  | 4.02141  | -4.78004 |
| H | 0.88236  | 4.98285  | -5.25068 |
| C | 0.67218  | -1.36143 | -3.57949 |
| C | -2.61481 | -1.28143 | -2.06728 |
| H | -2.01685 | -1.84474 | -1.35129 |
| C | 0.15892  | 1.54972  | -3.56942 |
| C | 0.05567  | 3.97428  | -3.52841 |
| H | -0.22757 | 4.89692  | -3.02219 |
| C | -0.00773 | -2.47676 | -4.09871 |
| H | -1.09487 | -2.52590 | -4.05437 |
| C | 2.10375  | -3.46279 | -4.75761 |
| H | 2.66026  | -4.27896 | -5.21773 |
| C | -2.79113 | 0.40850  | -3.80520 |
| H | -2.33194 | 1.16133  | -4.44470 |
| C | 0.77965  | 1.60128  | -4.82845 |
| H | 1.05650  | 0.68165  | -5.34216 |
| C | -0.19972 | 2.74585  | -2.92052 |
| H | -0.67635 | 2.71170  | -1.94027 |
| C | -4.16322 | 0.16747  | -3.89121 |
| H | -4.76565 | 0.73420  | -4.60060 |
| C | 1.03824  | 2.83668  | -5.42650 |
| H | 1.51980  | 2.87044  | -6.40342 |

Vibrational Spectrum (first 50 lines):

| #  | mode | symmetry | wave number | IR intensity | selection rules |
|----|------|----------|-------------|--------------|-----------------|
| #  |      | cm**(-1) | km/mol      | IR           | RAMAN           |
| 1  | a    | -37.26   | 0.00000     | YES          | YES             |
| 2  |      | 0.00     | 0.00000     | -            | -               |
| 3  |      | 0.00     | 0.00000     | -            | -               |
| 4  |      | 0.00     | 0.00000     | -            | -               |
| 5  |      | 0.00     | 0.00000     | -            | -               |
| 6  |      | 0.00     | 0.00000     | -            | -               |
| 7  |      | 0.00     | 0.00000     | -            | -               |
| 8  | a    | 5.92     | 0.20829     | YES          | YES             |
| 9  | a    | 10.87    | 0.60281     | YES          | YES             |
| 10 | a    | 16.28    | 0.46690     | YES          | YES             |
| 11 | a    | 18.87    | 2.62764     | YES          | YES             |
| 12 | a    | 23.24    | 0.07408     | YES          | YES             |
| 13 | a    | 26.37    | 5.90171     | YES          | YES             |
| 14 | a    | 34.20    | 0.32905     | YES          | YES             |
| 15 | a    | 36.43    | 1.54009     | YES          | YES             |
| 16 | a    | 39.40    | 3.12504     | YES          | YES             |
| 17 | a    | 42.76    | 5.44562     | YES          | YES             |

|    |   |        |          |     |     |
|----|---|--------|----------|-----|-----|
| 18 | a | 44.90  | 13.21965 | YES | YES |
| 19 | a | 46.84  | 1.59235  | YES | YES |
| 20 | a | 53.32  | 4.01714  | YES | YES |
| 21 | a | 55.38  | 0.10037  | YES | YES |
| 22 | a | 56.51  | 4.40176  | YES | YES |
| 23 | a | 59.65  | 1.87348  | YES | YES |
| 24 | a | 60.64  | 5.33166  | YES | YES |
| 25 | a | 64.92  | 4.53160  | YES | YES |
| 26 | a | 70.22  | 1.75660  | YES | YES |
| 27 | a | 73.55  | 10.87669 | YES | YES |
| 28 | a | 113.59 | 0.84465  | YES | YES |
| 29 | a | 126.32 | 25.13252 | YES | YES |
| 30 | a | 142.61 | 1.10424  | YES | YES |
| 31 | a | 182.48 | 1.16376  | YES | YES |
| 32 | a | 185.19 | 1.17285  | YES | YES |
| 33 | a | 191.06 | 0.86663  | YES | YES |
| 34 | a | 196.91 | 2.03577  | YES | YES |
| 35 | a | 202.87 | 1.50389  | YES | YES |
| 36 | a | 207.18 | 1.41907  | YES | YES |
| 37 | a | 232.16 | 78.66780 | YES | YES |
| 38 | a | 236.49 | 0.31996  | YES | YES |
| 39 | a | 237.95 | 4.52844  | YES | YES |
| 40 | a | 252.92 | 1.22521  | YES | YES |
| 41 | a | 255.02 | 2.37449  | YES | YES |
| 42 | a | 256.90 | 2.05566  | YES | YES |
| 43 | a | 261.63 | 0.91239  | YES | YES |
| 44 | a | 300.01 | 6.77761  | YES | YES |
| 45 | a | 389.34 | 0.26924  | YES | YES |
| 46 | a | 389.58 | 1.46141  | YES | YES |
| 47 | a | 390.17 | 1.21143  | YES | YES |
| 48 | a | 390.54 | 0.20915  | YES | YES |
| 49 | a | 390.89 | 0.21748  | YES | YES |
| 50 | a | 393.80 | 2.38398  | YES | YES |

## TS [PhS(PPh3)(PtBu3)]+

bp86\_def2-tzvpp energy (au): -2481.5417241010

Zero point energy (au): 0.7155244

Entropy (kJ mol<sup>-1</sup>): 1.08248

Chemical potential (kJ mol<sup>-1</sup>): 1672.39

XYZ coordinates:

86

|   |          |          |          |
|---|----------|----------|----------|
| P | -2.25270 | 0.31672  | 0.01975  |
| S | 0.24253  | 0.02625  | -0.01367 |
| C | 0.07231  | -1.76245 | 0.03392  |
| C | -0.22339 | -2.46321 | -1.14584 |
| H | -0.32015 | -1.92124 | -2.08564 |
| C | -0.39250 | -3.84948 | -1.11196 |
| H | -0.62379 | -4.38632 | -2.03192 |
| C | -0.25510 | -4.54536 | 0.09313  |
| H | -0.37665 | -5.62813 | 0.11548  |
| C | 0.03464  | -3.84859 | 1.26927  |
| H | 0.13135  | -4.38403 | 2.21371  |
| C | 0.18858  | -2.45981 | 1.24474  |
| H | 0.38858  | -1.91533 | 2.16620  |
| C | -3.25541 | -0.57695 | 1.25058  |
| C | -3.33158 | -1.98084 | 1.16678  |
| H | -2.82091 | -2.51130 | 0.36271  |
| C | -4.06826 | -2.69997 | 2.10720  |
| H | -4.12872 | -3.78523 | 2.02801  |
| C | -4.72216 | -2.03396 | 3.14842  |
| H | -5.29341 | -2.59912 | 3.88450  |
| C | -4.64268 | -0.64278 | 3.24210  |
| H | -5.15555 | -0.11775 | 4.04782  |
| C | -3.91456 | 0.08647  | 2.29967  |
| H | -3.87007 | 1.17194  | 2.37578  |
| C | -2.40332 | 2.09412  | 0.38598  |
| C | -3.19230 | 2.95393  | -0.39552 |
| H | -3.74479 | 2.56336  | -1.24926 |
| C | -3.27486 | 4.31131  | -0.07762 |
| H | -3.89225 | 4.97007  | -0.68804 |
| C | -2.57663 | 4.82185  | 1.01939  |
| H | -2.64668 | 5.88110  | 1.26610  |
| C | -1.78915 | 3.97197  | 1.80164  |
| H | -1.24626 | 4.36558  | 2.66093  |
| C | -1.69543 | 2.61613  | 1.48482  |
| H | -1.07979 | 1.95737  | 2.09838  |
| C | -3.02392 | 0.04456  | -1.60932 |
| C | -4.31650 | -0.48794 | -1.74887 |
| H | -4.89387 | -0.76104 | -0.86655 |
| C | -4.86732 | -0.66268 | -3.02049 |
| H | -5.87133 | -1.07492 | -3.11909 |
| C | -4.14034 | -0.30620 | -4.15887 |
| H | -4.57469 | -0.44292 | -5.14900 |
| C | -2.85408 | 0.22610  | -4.02647 |
| H | -2.28389 | 0.50660  | -4.91201 |
| C | -2.29424 | 0.39471  | -2.76012 |

|   |          |          |          |
|---|----------|----------|----------|
| H | -1.28704 | 0.80149  | -2.66177 |
| P | 2.77779  | 0.21091  | -0.02648 |
| C | 3.07339  | 1.43334  | -1.50065 |
| C | 4.38656  | 2.23319  | -1.39256 |
| H | 4.49273  | 2.84084  | -2.30467 |
| C | 1.89805  | 2.43144  | -1.60721 |
| H | 2.08984  | 3.07715  | -2.47741 |
| H | 1.79028  | 3.08321  | -0.73663 |
| H | 0.94405  | 1.92018  | -1.77862 |
| C | 3.13037  | 1.10529  | 1.65155  |
| C | 4.62878  | 1.26855  | 1.97199  |
| H | 4.71863  | 1.83249  | 2.91338  |
| H | 5.16957  | 1.82980  | 1.20232  |
| H | 5.13729  | 0.31053  | 2.12392  |
| H | 2.85809  | -0.69384 | 2.92346  |
| H | 1.36784  | 0.23210  | 2.62396  |
| H | 2.60772  | 0.85939  | 3.72871  |
| C | 2.47785  | 2.50268  | 1.64661  |
| H | 1.41065  | 2.46586  | 1.39413  |
| H | 2.97886  | 3.20704  | 0.97429  |
| H | 2.56107  | 2.91335  | 2.66419  |
| C | 3.94533  | -1.33397 | -0.20691 |
| C | 3.96751  | -2.12421 | 1.11636  |
| H | 4.52162  | -3.05767 | 0.93657  |
| H | 2.96080  | -2.40370 | 1.45012  |
| H | 4.48142  | -1.59669 | 1.92643  |
| C | 5.39298  | -0.97035 | -0.59065 |
| H | 5.86964  | -0.28618 | 0.11935  |
| H | 5.46751  | -0.53952 | -1.59507 |
| H | 5.98328  | -1.90011 | -0.59677 |
| C | 3.36782  | -2.28595 | -1.27512 |
| H | 3.32630  | -1.84802 | -2.27564 |
| H | 2.36646  | -2.63906 | -1.00839 |
| H | 4.02650  | -3.16593 | -1.33078 |
| H | 4.38600  | 2.92756  | -0.54484 |
| H | 5.27439  | 1.59709  | -1.31906 |
| C | 3.07816  | 0.63621  | -2.82105 |
| H | 3.08185  | 1.35846  | -3.65113 |
| H | 3.96487  | 0.00496  | -2.93976 |
| H | 2.18048  | 0.01378  | -2.93174 |
| C | 2.44959  | 0.31114  | 2.78779  |

Vibrational Spectrum (first 50 lines):

| #  | mode | symmetry | wave number | IR intensity | selection rules |
|----|------|----------|-------------|--------------|-----------------|
| #  |      |          | cm**(-1)    | km/mol       | IR RAMAN        |
| 1  | a    |          | -105.13     | 0.00000      | YES YES         |
| 2  |      |          | 0.00        | 0.00000      | - -             |
| 3  |      |          | 0.00        | 0.00000      | - -             |
| 4  |      |          | 0.00        | 0.00000      | - -             |
| 5  |      |          | 0.00        | 0.00000      | - -             |
| 6  |      |          | 0.00        | 0.00000      | - -             |
| 7  |      |          | 0.00        | 0.00000      | - -             |
| 8  | a    |          | 4.41        | 0.09151      | YES YES         |
| 9  | a    |          | 15.16       | 0.14058      | YES YES         |
| 10 | a    |          | 20.26       | 0.02065      | YES YES         |
| 11 | a    |          | 21.50       | 0.17716      | YES YES         |

|    |   |        |          |     |     |
|----|---|--------|----------|-----|-----|
| 12 | a | 38.04  | 0.15963  | YES | YES |
| 13 | a | 40.29  | 1.13567  | YES | YES |
| 14 | a | 44.79  | 0.02871  | YES | YES |
| 15 | a | 47.47  | 0.06975  | YES | YES |
| 16 | a | 53.34  | 0.15940  | YES | YES |
| 17 | a | 59.51  | 0.06070  | YES | YES |
| 18 | a | 63.77  | 0.39381  | YES | YES |
| 19 | a | 66.50  | 0.20239  | YES | YES |
| 20 | a | 72.87  | 0.51145  | YES | YES |
| 21 | a | 75.79  | 0.28929  | YES | YES |
| 22 | a | 94.41  | 2.53930  | YES | YES |
| 23 | a | 97.34  | 0.01362  | YES | YES |
| 24 | a | 102.87 | 0.13526  | YES | YES |
| 25 | a | 117.24 | 0.61976  | YES | YES |
| 26 | a | 127.92 | 0.26599  | YES | YES |
| 27 | a | 150.95 | 0.81404  | YES | YES |
| 28 | a | 179.38 | 0.15911  | YES | YES |
| 29 | a | 183.69 | 0.93329  | YES | YES |
| 30 | a | 188.39 | 0.22895  | YES | YES |
| 31 | a | 191.57 | 0.08246  | YES | YES |
| 32 | a | 193.85 | 1.66083  | YES | YES |
| 33 | a | 196.58 | 0.67236  | YES | YES |
| 34 | a | 201.98 | 0.57376  | YES | YES |
| 35 | a | 203.77 | 1.74605  | YES | YES |
| 36 | a | 206.81 | 0.69400  | YES | YES |
| 37 | a | 228.36 | 40.03558 | YES | YES |
| 38 | a | 234.14 | 8.36631  | YES | YES |
| 39 | a | 237.08 | 0.42205  | YES | YES |
| 40 | a | 240.49 | 2.25699  | YES | YES |
| 41 | a | 244.71 | 1.30295  | YES | YES |
| 42 | a | 249.78 | 1.42594  | YES | YES |
| 43 | a | 253.86 | 1.45398  | YES | YES |
| 44 | a | 254.99 | 0.06047  | YES | YES |
| 45 | a | 259.56 | 0.51575  | YES | YES |
| 46 | a | 266.94 | 1.10574  | YES | YES |
| 47 | a | 275.48 | 0.16143  | YES | YES |
| 48 | a | 278.80 | 0.07496  | YES | YES |
| 49 | a | 286.71 | 0.50619  | YES | YES |
| 50 | a | 296.27 | 6.81316  | YES | YES |

## TS [PhSe(PPh3)2]<sup>+</sup>

bp86\_def2-tzvpp energy (au): -4706.6644306490

Zero point energy (au): 0.6230801

Entropy (kJ mol<sup>-1</sup>): 1.14497

Chemical potential (kJ mol<sup>-1</sup>): 1408.97

XYZ coordinates:

80

|    |          |          |          |
|----|----------|----------|----------|
| C  | -4.75073 | 0.66993  | 3.32819  |
| H  | -5.81641 | 0.83179  | 3.48905  |
| C  | 2.78999  | 2.36186  | 4.06305  |
| H  | 3.87825  | 2.37051  | 4.00520  |
| Se | -0.13599 | 0.00026  | -0.00261 |
| P  | -0.22961 | 0.01465  | 2.60713  |
| C  | 0.72202  | 3.33800  | 4.85264  |
| H  | 0.19273  | 4.10727  | 5.41470  |
| C  | -4.05244 | 1.46632  | 2.41618  |
| H  | -4.57089 | 2.24985  | 1.86385  |
| C  | -2.00828 | 0.25294  | 2.91822  |
| C  | 2.07344  | 1.35622  | 3.41517  |
| H  | 2.60767  | 0.58938  | 2.85359  |
| C  | 0.88463  | -4.06519 | 4.48187  |
| H  | 1.13727  | -5.03308 | 4.91441  |
| C  | 0.66778  | 1.32833  | 3.49318  |
| C  | 3.90257  | 1.19460  | -0.21987 |
| H  | 4.44298  | 2.12573  | -0.39022 |
| C  | -2.68883 | 1.25768  | 2.20544  |
| H  | -2.15027 | 1.87951  | 1.48928  |
| C  | 0.23762  | -1.57400 | 3.36969  |
| C  | 0.22730  | -3.99982 | 3.24929  |
| H  | -0.03448 | -4.91552 | 2.71930  |
| C  | -0.00365 | 2.33003  | 4.21389  |
| H  | -1.09046 | 2.31859  | 4.28514  |
| C  | 2.11659  | 3.35579  | 4.78021  |
| H  | 2.67941  | 4.14211  | 5.28279  |
| C  | -2.71660 | -0.54560 | 3.83129  |
| H  | -2.20211 | -1.32974 | 4.38554  |
| C  | 0.89665  | -1.64558 | 4.60816  |
| H  | 1.15530  | -0.73342 | 5.14441  |
| C  | -0.08963 | -2.76168 | 2.69059  |
| H  | -0.59302 | -2.71383 | 1.72392  |
| C  | 2.50673  | -1.19395 | 0.21110  |
| H  | 1.96303  | -2.12423 | 0.36818  |
| C  | -4.08211 | -0.33474 | 4.03230  |
| H  | -4.62355 | -0.95711 | 4.74454  |
| C  | 1.21846  | -2.88896 | 5.15735  |
| H  | 1.72858  | -2.93594 | 6.11933  |
| C  | 3.90468  | -1.18617 | 0.21917  |
| H  | 4.44675  | -2.11619 | 0.39030  |
| C  | 2.50459  | 1.19949  | -0.21385 |
| H  | 1.95920  | 2.12869  | -0.37153 |
| C  | 4.60275  | 0.00494  | 0.00022  |
| H  | 5.69265  | 0.00608  | 0.00119  |



|   |          |          |          |
|---|----------|----------|----------|
| C | 1.80938  | 0.00204  | -0.00191 |
| C | -4.74339 | -0.68610 | -3.34350 |
| H | -5.80795 | -0.85147 | -3.50812 |
| C | 2.80512  | -2.34897 | -4.05844 |
| H | 3.89353  | -2.35053 | -4.00290 |
| P | -0.22720 | -0.01481 | -2.60755 |
| C | 0.74159  | -3.34226 | -4.83828 |
| H | 0.21595  | -4.11785 | -5.39505 |
| C | -4.04899 | -1.47027 | -2.41809 |
| H | -4.56931 | -2.24780 | -1.85912 |
| C | -2.00410 | -0.25956 | -2.92321 |
| C | 2.08376  | -1.34422 | -3.41454 |
| H | 2.61447  | -0.57097 | -2.85845 |
| C | 0.87592  | 4.06988  | -4.47786 |
| H | 1.12596  | 5.03893  | -4.90930 |
| C | 0.67776  | -1.32553 | -3.48973 |
| C | -2.68683 | -1.25698 | -2.20240 |
| H | -2.15117 | -1.86949 | -1.47614 |
| C | 0.23609  | 1.57577  | -3.36818 |
| C | 0.21440  | 4.00145  | -3.24768 |
| H | -0.05341 | 4.91592  | -2.71859 |
| C | 0.01103  | -2.33537 | -4.20347 |
| H | -1.07599 | -2.33102 | -4.27250 |
| C | 2.13640  | -3.35099 | -4.76867 |
| H | 2.70305  | -4.13666 | -5.26797 |
| C | -2.70851 | 0.52669  | -3.84997 |
| H | -2.19222 | 1.30519  | -4.41053 |
| C | 0.89909  | 1.65037  | -4.60438 |
| H | 1.16354  | 0.73945  | -5.13993 |
| C | -0.09908 | 2.76190  | -2.69023 |
| H | -0.60587 | 2.71173  | -1.72546 |
| C | -4.07246 | 0.31107  | -4.05611 |
| H | -4.61096 | 0.92388  | -4.77879 |
| C | 1.21731  | 2.89524  | -5.15232 |
| H | 1.73055  | 2.94461  | -6.11252 |

Vibrational Spectrum (first 50 lines):

| #  | mode | symmetry | wave number | IR intensity | selection rules |
|----|------|----------|-------------|--------------|-----------------|
| #  |      | cm**(-1) | km/mol      | IR           | RAMAN           |
| 1  |      | 0.00     | 0.00000     | -            | -               |
| 2  |      | 0.00     | 0.00000     | -            | -               |
| 3  |      | 0.00     | 0.00000     | -            | -               |
| 4  |      | 0.00     | 0.00000     | -            | -               |
| 5  |      | 0.00     | 0.00000     | -            | -               |
| 6  |      | 0.00     | 0.00000     | -            | -               |
| 7  | a    | 6.98     | 0.00874     | YES          | YES             |
| 8  | a    | 11.78    | 6.74251     | YES          | YES             |
| 9  | a    | 14.79    | 14.13999    | YES          | YES             |
| 10 | a    | 15.94    | 0.17845     | YES          | YES             |
| 11 | a    | 21.80    | 11.92777    | YES          | YES             |
| 12 | a    | 23.48    | 0.03073     | YES          | YES             |
| 13 | a    | 27.97    | 30.97163    | YES          | YES             |
| 14 | a    | 34.66    | 0.00841     | YES          | YES             |
| 15 | a    | 36.04    | 0.03166     | YES          | YES             |
| 16 | a    | 37.43    | 0.07089     | YES          | YES             |
| 17 | a    | 38.38    | 7.85350     | YES          | YES             |

|    |   |        |          |     |     |
|----|---|--------|----------|-----|-----|
| 18 | a | 42.86  | 6.96687  | YES | YES |
| 19 | a | 47.20  | 0.43758  | YES | YES |
| 20 | a | 51.43  | 7.32219  | YES | YES |
| 21 | a | 53.42  | 0.03007  | YES | YES |
| 22 | a | 55.14  | 0.03419  | YES | YES |
| 23 | a | 58.95  | 0.02637  | YES | YES |
| 24 | a | 60.78  | 22.65174 | YES | YES |
| 25 | a | 63.87  | 0.05345  | YES | YES |
| 26 | a | 66.66  | 1.06814  | YES | YES |
| 27 | a | 73.61  | 35.68194 | YES | YES |
| 28 | a | 93.96  | 0.00656  | YES | YES |
| 29 | a | 112.23 | 0.93814  | YES | YES |
| 30 | a | 113.07 | 0.02208  | YES | YES |
| 31 | a | 182.63 | 2.08559  | YES | YES |
| 32 | a | 182.74 | 0.55094  | YES | YES |
| 33 | a | 190.44 | 0.52263  | YES | YES |
| 34 | a | 191.52 | 4.58471  | YES | YES |
| 35 | a | 199.11 | 5.91609  | YES | YES |
| 36 | a | 201.48 | 0.51860  | YES | YES |
| 37 | a | 207.61 | 19.55412 | YES | YES |
| 38 | a | 236.08 | 5.97702  | YES | YES |
| 39 | a | 236.69 | 0.44570  | YES | YES |
| 40 | a | 237.75 | 0.22737  | YES | YES |
| 41 | a | 253.29 | 0.35217  | YES | YES |
| 42 | a | 253.49 | 1.01558  | YES | YES |
| 43 | a | 259.64 | 0.71820  | YES | YES |
| 44 | a | 260.80 | 0.41027  | YES | YES |
| 45 | a | 299.24 | 0.35525  | YES | YES |
| 46 | a | 388.79 | 0.51184  | YES | YES |
| 47 | a | 389.58 | 0.07956  | YES | YES |
| 48 | a | 390.14 | 0.97301  | YES | YES |
| 49 | a | 390.54 | 1.66298  | YES | YES |
| 50 | a | 390.85 | 0.29472  | YES | YES |

## TS [PhSe(PPh3)(PtBu3)]+

bp86\_def2-tzvpp energy (au): -4485.1441041940

Zero point energy (au): 0.7146932

Entropy (kJ mol<sup>-1</sup>): 1.11732

Chemical potential (kJ mol<sup>-1</sup>): 1663.24

XYZ coordinates:

86

|    |          |          |          |
|----|----------|----------|----------|
| P  | -2.15356 | 0.34112  | 0.00997  |
| Se | 0.35045  | 0.08028  | 0.00742  |
| C  | 0.20676  | -1.86383 | -0.02562 |
| C  | -0.04315 | -2.52108 | -1.23794 |
| H  | -0.13945 | -1.94957 | -2.16005 |
| C  | -0.17369 | -3.91282 | -1.25879 |
| H  | -0.37098 | -4.42066 | -2.20285 |
| C  | -0.04436 | -4.64884 | -0.07753 |
| H  | -0.13833 | -5.73441 | -0.09825 |
| C  | 0.20327  | -3.99060 | 1.12994  |
| H  | 0.29816  | -4.55912 | 2.05510  |
| C  | 0.32093  | -2.59776 | 1.16132  |
| H  | 0.49268  | -2.08645 | 2.10668  |
| C  | -3.10624 | -0.57434 | 1.25918  |
| C  | -3.17327 | -1.97827 | 1.16956  |
| H  | -2.68292 | -2.50158 | 0.34861  |
| C  | -3.87777 | -2.70578 | 2.12804  |
| H  | -3.93275 | -3.79107 | 2.04633  |
| C  | -4.50845 | -2.04812 | 3.18871  |
| H  | -5.05636 | -2.62049 | 3.93689  |
| C  | -4.43793 | -0.65665 | 3.28608  |
| H  | -4.93364 | -0.13883 | 4.10692  |
| C  | -3.74097 | 0.08171  | 2.32766  |
| H  | -3.70265 | 1.16729  | 2.40590  |
| C  | -2.34383 | 2.11971  | 0.34327  |
| C  | -3.17960 | 2.92967  | -0.44311 |
| H  | -3.73583 | 2.49807  | -1.27431 |
| C  | -3.30016 | 4.29155  | -0.15989 |
| H  | -3.95163 | 4.91299  | -0.77387 |
| C  | -2.59301 | 4.85447  | 0.90537  |
| H  | -2.69105 | 5.91768  | 1.12356  |
| C  | -1.75887 | 4.05376  | 1.69088  |
| H  | -1.20719 | 4.48965  | 2.52355  |
| C  | -1.62771 | 2.69301  | 1.41078  |
| H  | -0.97374 | 2.07306  | 2.02504  |
| C  | -2.90502 | 0.00717  | -1.61483 |
| C  | -4.19479 | -0.53683 | -1.73769 |
| H  | -4.77015 | -0.79100 | -0.84851 |
| C  | -4.74455 | -0.74864 | -3.00399 |
| H  | -5.74565 | -1.17031 | -3.09158 |
| C  | -4.01921 | -0.41785 | -4.15111 |
| H  | -4.45247 | -0.58477 | -5.13705 |
| C  | -2.73654 | 0.12659  | -4.03385 |
| H  | -2.16855 | 0.38657  | -4.92693 |
| C  | -2.17694 | 0.33371  | -2.77310 |

|   |          |          |          |
|---|----------|----------|----------|
| H | -1.17218 | 0.74855  | -2.68387 |
| P | 3.18697  | 0.26570  | -0.00059 |
| C | 3.48147  | 1.86484  | -1.05204 |
| C | 4.83859  | 2.55070  | -0.80488 |
| H | 4.92212  | 3.41118  | -1.48731 |
| C | 2.34652  | 2.87172  | -0.75710 |
| H | 2.50194  | 3.75549  | -1.39465 |
| H | 2.32232  | 3.21828  | 0.27899  |
| H | 1.36157  | 2.45855  | -1.01015 |
| C | 3.72327  | 0.59087  | 1.83073  |
| C | 5.24482  | 0.56105  | 2.06900  |
| H | 5.43572  | 0.80193  | 3.12658  |
| H | 5.78338  | 1.29821  | 1.46326  |
| H | 5.68250  | -0.42565 | 1.88175  |
| H | 3.34970  | -1.49429 | 2.50066  |
| H | 1.94980  | -0.40570 | 2.64262  |
| H | 3.31229  | -0.26283 | 3.77060  |
| C | 3.17710  | 1.95327  | 2.30331  |
| H | 2.09430  | 2.04093  | 2.14450  |
| H | 3.67647  | 2.80603  | 1.83168  |
| H | 3.35682  | 2.03131  | 3.38636  |
| C | 4.22092  | -1.19643 | -0.73784 |
| C | 4.24300  | -2.36498 | 0.26811  |
| H | 4.70385  | -3.23058 | -0.23134 |
| H | 3.23348  | -2.66535 | 0.57694  |
| H | 4.84092  | -2.15344 | 1.16093  |
| C | 5.67077  | -0.83299 | -1.10958 |
| H | 6.24867  | -0.45603 | -0.25881 |
| H | 5.72610  | -0.09701 | -1.91948 |
| H | 6.17292  | -1.74475 | -1.46974 |
| C | 3.49256  | -1.72100 | -1.99431 |
| H | 3.46965  | -1.00238 | -2.81734 |
| H | 2.46414  | -2.02491 | -1.76728 |
| H | 4.03016  | -2.61231 | -2.35235 |
| H | 4.93507  | 2.94054  | 0.21454  |
| H | 5.69056  | 1.89167  | -1.00376 |
| C | 3.36609  | 1.52299  | -2.55123 |
| H | 3.36394  | 2.46814  | -3.11507 |
| H | 4.20835  | 0.92939  | -2.92182 |
| H | 2.43054  | 0.99809  | -2.78489 |
| C | 3.04255  | -0.46903 | 2.72356  |

Vibrational Spectrum (first 50 lines):

| #  | mode | symmetry | wave number | IR intensity | selection rules |
|----|------|----------|-------------|--------------|-----------------|
| #  |      |          | cm**(-1)    | km/mol       | IR RAMAN        |
| 1  |      |          | 0.00        | 0.00000      | - -             |
| 2  |      |          | 0.00        | 0.00000      | - -             |
| 3  |      |          | 0.00        | 0.00000      | - -             |
| 4  |      |          | 0.00        | 0.00000      | - -             |
| 5  |      |          | 0.00        | 0.00000      | - -             |
| 6  |      |          | 0.00        | 0.00000      | - -             |
| 7  | a    |          | 8.48        | 1.17542      | YES YES         |
| 8  | a    |          | 13.23       | 0.91487      | YES YES         |
| 9  | a    |          | 18.79       | 3.69991      | YES YES         |
| 10 | a    |          | 22.00       | 0.00420      | YES YES         |
| 11 | a    |          | 31.42       | 63.55966     | YES YES         |

|    |   |        |          |     |     |
|----|---|--------|----------|-----|-----|
| 12 | a | 37.35  | 0.25456  | YES | YES |
| 13 | a | 39.48  | 2.49895  | YES | YES |
| 14 | a | 41.24  | 0.34000  | YES | YES |
| 15 | a | 44.02  | 0.10519  | YES | YES |
| 16 | a | 51.00  | 0.22987  | YES | YES |
| 17 | a | 54.43  | 2.28576  | YES | YES |
| 18 | a | 57.59  | 0.28908  | YES | YES |
| 19 | a | 63.69  | 0.09133  | YES | YES |
| 20 | a | 68.22  | 2.15612  | YES | YES |
| 21 | a | 73.94  | 0.05894  | YES | YES |
| 22 | a | 90.98  | 0.01817  | YES | YES |
| 23 | a | 96.35  | 1.20451  | YES | YES |
| 24 | a | 105.22 | 9.94324  | YES | YES |
| 25 | a | 109.08 | 22.56805 | YES | YES |
| 26 | a | 114.57 | 1.59598  | YES | YES |
| 27 | a | 127.62 | 0.27708  | YES | YES |
| 28 | a | 176.59 | 0.02614  | YES | YES |
| 29 | a | 183.62 | 0.43155  | YES | YES |
| 30 | a | 184.75 | 0.99157  | YES | YES |
| 31 | a | 190.20 | 0.09874  | YES | YES |
| 32 | a | 193.86 | 1.12672  | YES | YES |
| 33 | a | 195.94 | 0.58679  | YES | YES |
| 34 | a | 197.60 | 1.40683  | YES | YES |
| 35 | a | 199.95 | 5.30642  | YES | YES |
| 36 | a | 203.63 | 0.94013  | YES | YES |
| 37 | a | 210.81 | 17.35136 | YES | YES |
| 38 | a | 233.22 | 0.23167  | YES | YES |
| 39 | a | 235.78 | 2.95039  | YES | YES |
| 40 | a | 237.37 | 1.33481  | YES | YES |
| 41 | a | 239.64 | 0.23901  | YES | YES |
| 42 | a | 242.15 | 0.11022  | YES | YES |
| 43 | a | 251.79 | 0.35250  | YES | YES |
| 44 | a | 253.56 | 0.42028  | YES | YES |
| 45 | a | 254.17 | 0.31978  | YES | YES |
| 46 | a | 261.71 | 0.58318  | YES | YES |
| 47 | a | 265.26 | 0.39003  | YES | YES |
| 48 | a | 274.01 | 0.08699  | YES | YES |
| 49 | a | 276.10 | 0.06460  | YES | YES |
| 50 | a | 284.68 | 0.55118  | YES | YES |

## BP86-D3/SV(P) level optimisations

### PPh<sub>3</sub>

bp86-d3 energy (au): -1035.7698037320

Zero point energy (au): 0.2662863

Entropy (kJ mol<sup>-1</sup>): 0.55429

Chemical potential (kJ mol<sup>-1</sup>): 578.91

XYZ coordinates:

34

|   |          |          |          |
|---|----------|----------|----------|
| P | 0.00429  | -1.28036 | -0.00149 |
| C | 1.17303  | -0.43712 | 1.16927  |
| C | -0.13259 | -0.99132 | -2.78107 |
| H | -0.78031 | -1.88287 | -2.71300 |
| C | 1.26754  | 0.68600  | -1.71036 |
| H | 1.71428  | 1.12466  | -0.80317 |
| C | 0.42941  | -0.44517 | -1.60428 |
| C | 3.41832  | -0.40569 | 2.14504  |
| H | 4.42528  | -0.84777 | 2.22845  |
| C | 1.53200  | 1.25980  | -2.96622 |
| H | 2.19001  | 2.14234  | -3.03499 |
| C | 0.84540  | 0.70768  | 1.92787  |
| H | -0.15913 | 1.15353  | 1.84232  |
| C | 0.95797  | 0.71775  | -4.12906 |
| H | 1.16647  | 1.17024  | -5.11278 |
| C | 2.46733  | -0.99154 | 1.29432  |
| H | 2.73225  | -1.89348 | 0.71506  |
| C | 1.79415  | 1.28532  | 2.78930  |
| H | 1.52437  | 2.17829  | 3.37805  |
| C | 3.08235  | 0.73369  | 2.89812  |
| H | 3.82505  | 1.18945  | 3.57388  |
| C | 0.12095  | -0.40865 | -4.03304 |
| H | -0.32993 | -0.84276 | -4.94116 |
| C | -2.13926 | 0.64751  | -0.28027 |
| H | -1.60261 | 1.05689  | -1.15165 |
| C | -1.59708 | -0.44547 | 0.42986  |
| C | -2.30369 | -0.95357 | 1.54425  |
| H | -1.89606 | -1.81517 | 2.10166  |
| C | -3.35847 | 1.22176  | 0.12089  |
| H | -3.77196 | 2.07414  | -0.44402 |
| C | -4.04597 | 0.71933  | 1.23891  |
| H | -5.00074 | 1.17286  | 1.55303  |
| C | -3.51304 | -0.36958 | 1.95261  |
| H | -4.04773 | -0.77314 | 2.82874  |

Vibrational Spectrum (first 50 lines):

| #  | mode | symmetry | wave number<br>cm**(-1) | IR intensity<br>km/mol | IR  | selection rules<br>RAMAN |
|----|------|----------|-------------------------|------------------------|-----|--------------------------|
| 1  |      |          | 0.00                    | 0.00000                | -   | -                        |
| 2  |      |          | 0.00                    | 0.00000                | -   | -                        |
| 3  |      |          | 0.00                    | 0.00000                | -   | -                        |
| 4  |      |          | 0.00                    | 0.00000                | -   | -                        |
| 5  |      |          | 0.00                    | 0.00000                | -   | -                        |
| 6  |      |          | 0.00                    | 0.00000                | -   | -                        |
| 7  | a    |          | 32.15                   | 0.31290                | YES | YES                      |
| 8  | a    |          | 35.29                   | 0.32629                | YES | YES                      |
| 9  | a    |          | 50.49                   | 0.00857                | YES | YES                      |
| 10 | a    |          | 54.16                   | 0.09991                | YES | YES                      |
| 11 | a    |          | 55.44                   | 0.06705                | YES | YES                      |
| 12 | a    |          | 67.00                   | 0.40275                | YES | YES                      |
| 13 | a    |          | 182.11                  | 0.27329                | YES | YES                      |
| 14 | a    |          | 197.33                  | 1.07961                | YES | YES                      |
| 15 | a    |          | 198.97                  | 1.07236                | YES | YES                      |
| 16 | a    |          | 242.23                  | 0.69850                | YES | YES                      |
| 17 | a    |          | 254.55                  | 0.40265                | YES | YES                      |
| 18 | a    |          | 256.55                  | 0.42132                | YES | YES                      |
| 19 | a    |          | 394.71                  | 1.31338                | YES | YES                      |
| 20 | a    |          | 394.94                  | 1.44041                | YES | YES                      |
| 21 | a    |          | 396.90                  | 0.20985                | YES | YES                      |
| 22 | a    |          | 401.71                  | 0.18059                | YES | YES                      |
| 23 | a    |          | 419.87                  | 5.71722                | YES | YES                      |
| 24 | a    |          | 421.73                  | 6.27512                | YES | YES                      |
| 25 | a    |          | 494.26                  | 22.69662               | YES | YES                      |
| 26 | a    |          | 496.57                  | 23.64416               | YES | YES                      |
| 27 | a    |          | 506.72                  | 13.88280               | YES | YES                      |
| 28 | a    |          | 610.28                  | 0.24716                | YES | YES                      |
| 29 | a    |          | 610.33                  | 0.25081                | YES | YES                      |
| 30 | a    |          | 610.55                  | 0.07652                | YES | YES                      |
| 31 | a    |          | 672.07                  | 0.73607                | YES | YES                      |
| 32 | a    |          | 685.27                  | 1.09568                | YES | YES                      |
| 33 | a    |          | 685.92                  | 1.21718                | YES | YES                      |
| 34 | a    |          | 699.43                  | 33.82440               | YES | YES                      |
| 35 | a    |          | 699.73                  | 33.97641               | YES | YES                      |
| 36 | a    |          | 700.49                  | 30.90217               | YES | YES                      |
| 37 | a    |          | 743.91                  | 18.17083               | YES | YES                      |
| 38 | a    |          | 744.21                  | 14.41482               | YES | YES                      |
| 39 | a    |          | 744.88                  | 16.92334               | YES | YES                      |
| 40 | a    |          | 836.78                  | 0.06642                | YES | YES                      |
| 41 | a    |          | 837.46                  | 0.10913                | YES | YES                      |
| 42 | a    |          | 839.36                  | 0.21448                | YES | YES                      |
| 43 | a    |          | 904.10                  | 1.05262                | YES | YES                      |
| 44 | a    |          | 905.04                  | 0.87668                | YES | YES                      |
| 45 | a    |          | 906.19                  | 0.37407                | YES | YES                      |
| 46 | a    |          | 957.58                  | 0.03406                | YES | YES                      |
| 47 | a    |          | 957.79                  | 0.07613                | YES | YES                      |
| 48 | a    |          | 958.71                  | 0.10424                | YES | YES                      |
| 49 | a    |          | 982.06                  | 0.02845                | YES | YES                      |
| 50 | a    |          | 982.27                  | 0.01096                | YES | YES                      |

**P(<sup>t</sup>Bu)<sub>3</sub>**

bp86-d3 energy (au): -814.4604618103

Zero point energy (au): 0.3566093

Entropy (kJ mol<sup>-1</sup>): 0.53736

Chemical potential (kJ mol<sup>-1</sup>): 826.60

XYZ coordinates:

40

|   |          |          |          |
|---|----------|----------|----------|
| P | 0.70838  | 0.00056  | -0.00076 |
| C | -0.01952 | 1.71052  | -0.61558 |
| C | -1.49897 | 1.73631  | -1.04902 |
| H | -1.78730 | 2.77602  | -1.33634 |
| C | 0.87505  | 2.16416  | -1.79932 |
| H | 0.60788  | 3.21013  | -2.08122 |
| H | 0.75380  | 1.54313  | -2.70725 |
| H | 1.95132  | 2.15095  | -1.51897 |
| C | -0.01850 | -1.38778 | -1.17430 |
| C | -1.49733 | -1.77774 | -0.97944 |
| H | -1.78346 | -2.54945 | -1.73378 |
| H | -2.18385 | -0.91636 | -1.10987 |
| H | -1.68929 | -2.21851 | 0.02070  |
| H | 0.75630  | -3.11404 | 0.01812  |
| H | 1.95434  | -2.38576 | -1.10049 |
| H | 0.61421  | -3.40644 | -1.73822 |
| C | 0.18981  | -0.95909 | -2.64533 |
| H | 1.23889  | -0.64609 | -2.84268 |
| H | -0.48819 | -0.13888 | -2.95746 |
| H | -0.02672 | -1.82889 | -3.30900 |
| C | -0.01936 | -0.32219 | 1.78843  |
| C | 0.18616  | -1.81126 | 2.15280  |
| H | -0.03039 | -1.95085 | 3.23812  |
| H | 1.23465  | -2.13946 | 1.97961  |
| H | -0.49325 | -2.49071 | 1.59901  |
| C | -1.49797 | 0.04323  | 2.02928  |
| H | -2.18443 | -0.49732 | 1.34627  |
| H | -1.68896 | 1.13052  | 1.91602  |
| H | -1.78412 | -0.22814 | 3.07368  |
| C | 0.87917  | 0.47331  | 2.77203  |
| H | 0.76542  | 1.57089  | 2.68491  |
| H | 1.95388  | 0.22893  | 2.62207  |
| H | 0.60905  | 0.20005  | 3.81976  |
| H | -1.69015 | 1.09401  | -1.93352 |
| H | -2.18448 | 1.41429  | -0.23864 |
| C | 0.18901  | 2.76945  | 0.49209  |
| H | -0.03214 | 3.77918  | 0.07308  |
| H | -0.48635 | 2.62725  | 1.36048  |
| H | 1.23891  | 2.78597  | 0.85868  |
| C | 0.87854  | -2.63807 | -0.97372 |



Vibrational Spectrum (first 50 lines):

| #  | mode | symmetry | wave number<br>cm**(-1) | IR intensity<br>km/mol | IR  | selection rules<br>RAMAN |
|----|------|----------|-------------------------|------------------------|-----|--------------------------|
| 1  |      |          | 0.00                    | 0.00000                | -   | -                        |
| 2  |      |          | 0.00                    | 0.00000                | -   | -                        |
| 3  |      |          | 0.00                    | 0.00000                | -   | -                        |
| 4  |      |          | 0.00                    | 0.00000                | -   | -                        |
| 5  |      |          | 0.00                    | 0.00000                | -   | -                        |
| 6  |      |          | 0.00                    | 0.00000                | -   | -                        |
| 7  | a    |          | 94.98                   | 0.01118                | YES | YES                      |
| 8  | a    |          | 97.85                   | 0.01011                | YES | YES                      |
| 9  | a    |          | 125.86                  | 0.00042                | YES | YES                      |
| 10 | a    |          | 174.06                  | 0.05013                | YES | YES                      |
| 11 | a    |          | 182.43                  | 0.01514                | YES | YES                      |
| 12 | a    |          | 184.20                  | 0.01973                | YES | YES                      |
| 13 | a    |          | 202.74                  | 0.03690                | YES | YES                      |
| 14 | a    |          | 203.68                  | 0.00756                | YES | YES                      |
| 15 | a    |          | 209.96                  | 0.05360                | YES | YES                      |
| 16 | a    |          | 241.04                  | 0.19185                | YES | YES                      |
| 17 | a    |          | 243.06                  | 0.02876                | YES | YES                      |
| 18 | a    |          | 250.69                  | 0.14086                | YES | YES                      |
| 19 | a    |          | 258.79                  | 0.29993                | YES | YES                      |
| 20 | a    |          | 261.10                  | 0.27941                | YES | YES                      |
| 21 | a    |          | 272.39                  | 0.02564                | YES | YES                      |
| 22 | a    |          | 278.53                  | 0.04371                | YES | YES                      |
| 23 | a    |          | 285.30                  | 0.07696                | YES | YES                      |
| 24 | a    |          | 297.72                  | 0.02508                | YES | YES                      |
| 25 | a    |          | 330.90                  | 0.23616                | YES | YES                      |
| 26 | a    |          | 340.44                  | 0.30393                | YES | YES                      |
| 27 | a    |          | 345.74                  | 0.32420                | YES | YES                      |
| 28 | a    |          | 354.94                  | 0.00399                | YES | YES                      |
| 29 | a    |          | 367.64                  | 0.18594                | YES | YES                      |
| 30 | a    |          | 369.55                  | 0.22521                | YES | YES                      |
| 31 | a    |          | 401.27                  | 0.43498                | YES | YES                      |
| 32 | a    |          | 402.35                  | 0.30160                | YES | YES                      |
| 33 | a    |          | 405.20                  | 0.18501                | YES | YES                      |
| 34 | a    |          | 452.51                  | 3.40440                | YES | YES                      |
| 35 | a    |          | 454.90                  | 3.46408                | YES | YES                      |
| 36 | a    |          | 475.44                  | 0.73520                | YES | YES                      |
| 37 | a    |          | 534.12                  | 0.18770                | YES | YES                      |
| 38 | a    |          | 560.14                  | 4.95399                | YES | YES                      |
| 39 | a    |          | 561.38                  | 4.97673                | YES | YES                      |
| 40 | a    |          | 794.83                  | 11.23698               | YES | YES                      |
| 41 | a    |          | 796.62                  | 8.94612                | YES | YES                      |
| 42 | a    |          | 799.33                  | 4.93817                | YES | YES                      |
| 43 | a    |          | 909.62                  | 2.15722                | YES | YES                      |
| 44 | a    |          | 910.64                  | 2.12114                | YES | YES                      |
| 45 | a    |          | 912.82                  | 2.01517                | YES | YES                      |
| 46 | a    |          | 917.98                  | 0.29397                | YES | YES                      |
| 47 | a    |          | 919.89                  | 1.03659                | YES | YES                      |
| 48 | a    |          | 921.16                  | 1.32819                | YES | YES                      |
| 49 | a    |          | 923.04                  | 0.25391                | YES | YES                      |
| 50 | a    |          | 929.07                  | 0.84492                | YES | YES                      |

**[GaCl<sub>4</sub>]<sup>-</sup>**

bp86-d3 energy (au): -3765.6467668620

Zero point energy (au): 0.0047297

Entropy (kJ mol<sup>-1</sup>): 0.36230

Chemical potential (kJ mol<sup>-1</sup>): -73.01

XYZ coordinates:

5

|    |          |          |          |
|----|----------|----------|----------|
| Ga | 0.00000  | 0.00000  | 0.00000  |
| Cl | -1.28496 | -1.28496 | -1.28496 |
| Cl | 1.28496  | 1.28496  | -1.28496 |
| Cl | 1.28496  | -1.28496 | 1.28496  |
| Cl | -1.28496 | 1.28496  | 1.28496  |

Vibrational Spectrum:

| #  | mode | symmetry             | wave number | IR intensity | selection rules |
|----|------|----------------------|-------------|--------------|-----------------|
| #  |      | cm <sup>**(-1)</sup> | km/mol      | IR           | RAMAN           |
| 1  |      | 0.00                 | 0.00000     | -            | -               |
| 2  |      | 0.00                 | 0.00000     | -            | -               |
| 3  |      | 0.00                 | 0.00000     | -            | -               |
| 4  |      | 0.00                 | 0.00000     | -            | -               |
| 5  |      | 0.00                 | 0.00000     | -            | -               |
| 6  |      | 0.00                 | 0.00000     | -            | -               |
| 7  | e    | 101.76               | 0.00000     | NO           | YES             |
| 8  | e    | 101.76               | 0.00000     | NO           | YES             |
| 9  | t2   | 144.55               | 8.12793     | YES          | YES             |
| 10 | t2   | 144.55               | 8.12793     | YES          | YES             |
| 11 | t2   | 144.55               | 8.12793     | YES          | YES             |
| 12 | a1   | 320.38               | 0.00000     | NO           | YES             |
| 13 | t2   | 372.84               | 79.84398    | YES          | YES             |
| 14 | t2   | 372.84               | 79.84398    | YES          | YES             |
| 15 | t2   | 372.84               | 79.84398    | YES          | YES             |

**[PhS]<sup>+</sup>**

bp86-d3 energy (au): -629.2658134425

Zero point energy (au): 0.0881591

Entropy (kJ mol<sup>-1</sup>): 0.32772Chemical potential (kJ mol<sup>-1</sup>): 151.80

XYZ coordinates:

12

|   |          |          |          |
|---|----------|----------|----------|
| C | -2.27113 | -0.00004 | -0.00119 |
| H | -3.37521 | -0.00010 | -0.00238 |
| C | -0.20150 | 1.26401  | 0.00060  |
| H | 0.37069  | 2.20616  | 0.00074  |
| C | -1.58504 | 1.24925  | 0.00005  |
| H | -2.15956 | 2.18920  | -0.00010 |
| C | 0.54061  | 0.00004  | 0.00145  |
| C | -0.20142 | -1.26399 | 0.00136  |
| H | 0.37087  | -2.20609 | 0.00260  |
| C | -1.58496 | -1.24931 | -0.00094 |
| H | -2.15947 | -2.18927 | -0.00197 |
| S | 2.20671  | 0.00009  | 0.00163  |

Vibrational Spectrum:

| # mode # | symmetry | wave number<br>cm <sup>**(-1)</sup> | km/mol   | IR intensity<br>IR | selection rules<br>RAMAN |
|----------|----------|-------------------------------------|----------|--------------------|--------------------------|
| 1        |          | 0.00                                | 0.00000  | -                  | -                        |
| 2        |          | 0.00                                | 0.00000  | -                  | -                        |
| 3        |          | 0.00                                | 0.00000  | -                  | -                        |
| 4        |          | 0.00                                | 0.00000  | -                  | -                        |
| 5        |          | 0.00                                | 0.00000  | -                  | -                        |
| 6        |          | 0.00                                | 0.00000  | -                  | -                        |
| 7        | a        | 106.84                              | 0.00164  | YES                | YES                      |
| 8        | a        | 295.77                              | 0.00879  | YES                | YES                      |
| 9        | a        | 312.55                              | 0.00000  | YES                | YES                      |
| 10       | a        | 372.83                              | 0.20396  | YES                | YES                      |
| 11       | a        | 429.46                              | 0.14956  | YES                | YES                      |
| 12       | a        | 565.99                              | 2.46135  | YES                | YES                      |
| 13       | a        | 612.09                              | 43.38502 | YES                | YES                      |
| 14       | a        | 719.20                              | 3.02552  | YES                | YES                      |
| 15       | a        | 785.02                              | 27.55994 | YES                | YES                      |
| 16       | a        | 797.81                              | 0.00004  | YES                | YES                      |
| 17       | a        | 962.66                              | 5.37220  | YES                | YES                      |
| 18       | a        | 979.45                              | 0.73765  | YES                | YES                      |
| 19       | a        | 986.36                              | 7.67765  | YES                | YES                      |
| 20       | a        | 991.02                              | 0.00134  | YES                | YES                      |
| 21       | a        | 1024.22                             | 1.74026  | YES                | YES                      |
| 22       | a        | 1072.36                             | 4.86080  | YES                | YES                      |
| 23       | a        | 1120.56                             | 23.94002 | YES                | YES                      |
| 24       | a        | 1148.19                             | 11.54427 | YES                | YES                      |

|    |   |         |           |     |     |
|----|---|---------|-----------|-----|-----|
| 25 | a | 1178.11 | 0.00238   | YES | YES |
| 26 | a | 1238.93 | 6.56263   | YES | YES |
| 27 | a | 1351.07 | 0.02878   | YES | YES |
| 28 | a | 1411.53 | 17.22923  | YES | YES |
| 29 | a | 1463.16 | 107.88925 | YES | YES |
| 30 | a | 1508.13 | 12.06342  | YES | YES |
| 31 | a | 1607.27 | 129.92595 | YES | YES |
| 32 | a | 3117.38 | 0.54578   | YES | YES |
| 33 | a | 3128.36 | 2.15047   | YES | YES |
| 34 | a | 3130.09 | 10.98934  | YES | YES |
| 35 | a | 3139.19 | 18.64368  | YES | YES |
| 36 | a | 3141.76 | 0.54627   | YES | YES |

## PhSCI.GaCl3\_iso2

bp86-d3 energy (au): -4395.1032251820

Zero point energy (au): 0.0945176

Entropy (kJ mol<sup>-1</sup>): 0.56797

Chemical potential (kJ mol<sup>-1</sup>): 121.37

XYZ coordinates:

17

|    |          |          |          |
|----|----------|----------|----------|
| S  | 0.40571  | 0.37937  | 1.56638  |
| C  | -1.07418 | -0.33503 | 0.94011  |
| C  | -1.10588 | -0.87162 | -0.37209 |
| H  | -0.17760 | -0.90818 | -0.96298 |
| C  | -2.31224 | -1.36639 | -0.88308 |
| H  | -2.34341 | -1.78831 | -1.90057 |
| C  | -3.48229 | -1.32186 | -0.09941 |
| H  | -4.43008 | -1.70821 | -0.50965 |
| C  | -3.45237 | -0.79156 | 1.20536  |
| H  | -4.37152 | -0.76310 | 1.81252  |
| C  | -2.24929 | -0.30653 | 1.73394  |
| H  | -2.20210 | 0.10226  | 2.75565  |
| Ga | 3.30625  | -1.66686 | 0.64709  |
| Cl | 1.46190  | -1.39158 | 2.35225  |
| Cl | 4.30998  | -3.28908 | 1.66981  |
| Cl | 4.17308  | 0.31268  | 0.71137  |
| Cl | 2.18806  | -2.18899 | -1.14470 |

Vibrational Spectrum (first 50 lines):

| #  | mode | symmetry             | wave number | IR intensity | selection rules |
|----|------|----------------------|-------------|--------------|-----------------|
| #  |      | cm <sup>**(-1)</sup> | km/mol      | IR           | RAMAN           |
| 1  |      | 0.00                 | 0.00000     | -            | -               |
| 2  |      | 0.00                 | 0.00000     | -            | -               |
| 3  |      | 0.00                 | 0.00000     | -            | -               |
| 4  |      | 0.00                 | 0.00000     | -            | -               |
| 5  |      | 0.00                 | 0.00000     | -            | -               |
| 6  |      | 0.00                 | 0.00000     | -            | -               |
| 7  | a    | 12.46                | 0.14365     | YES          | YES             |
| 8  | a    | 20.28                | 0.05025     | YES          | YES             |
| 9  | a    | 48.44                | 0.82016     | YES          | YES             |
| 10 | a    | 58.06                | 0.52122     | YES          | YES             |
| 11 | a    | 63.36                | 0.57575     | YES          | YES             |
| 12 | a    | 88.97                | 0.09527     | YES          | YES             |
| 13 | a    | 100.97               | 0.14568     | YES          | YES             |
| 14 | a    | 122.21               | 5.20121     | YES          | YES             |
| 15 | a    | 126.31               | 5.81994     | YES          | YES             |
| 16 | a    | 137.92               | 32.07820    | YES          | YES             |
| 17 | a    | 179.90               | 47.80343    | YES          | YES             |
| 18 | a    | 215.79               | 18.84567    | YES          | YES             |
| 19 | a    | 278.47               | 2.03664     | YES          | YES             |

|    |   |         |          |     |     |
|----|---|---------|----------|-----|-----|
| 20 | a | 335.39  | 45.73264 | YES | YES |
| 21 | a | 352.08  | 15.33068 | YES | YES |
| 22 | a | 398.66  | 5.81921  | YES | YES |
| 23 | a | 407.89  | 5.32813  | YES | YES |
| 24 | a | 420.01  | 72.60686 | YES | YES |
| 25 | a | 432.95  | 59.15668 | YES | YES |
| 26 | a | 482.92  | 11.37661 | YES | YES |
| 27 | a | 602.64  | 0.29355  | YES | YES |
| 28 | a | 680.66  | 35.02066 | YES | YES |
| 29 | a | 707.77  | 3.13431  | YES | YES |
| 30 | a | 753.81  | 27.40125 | YES | YES |
| 31 | a | 827.42  | 0.60697  | YES | YES |
| 32 | a | 925.67  | 3.33422  | YES | YES |
| 33 | a | 966.01  | 0.54052  | YES | YES |
| 34 | a | 984.55  | 0.62993  | YES | YES |
| 35 | a | 996.62  | 0.26781  | YES | YES |
| 36 | a | 1017.72 | 0.22026  | YES | YES |
| 37 | a | 1068.50 | 54.61205 | YES | YES |
| 38 | a | 1072.05 | 9.65245  | YES | YES |
| 39 | a | 1146.62 | 0.31120  | YES | YES |
| 40 | a | 1160.79 | 4.13916  | YES | YES |
| 41 | a | 1282.84 | 1.06542  | YES | YES |
| 42 | a | 1368.23 | 5.34013  | YES | YES |
| 43 | a | 1434.09 | 17.41831 | YES | YES |
| 44 | a | 1455.52 | 0.59157  | YES | YES |
| 45 | a | 1575.00 | 0.11215  | YES | YES |
| 46 | a | 1591.45 | 41.42320 | YES | YES |
| 47 | a | 3101.22 | 0.74324  | YES | YES |
| 48 | a | 3112.38 | 6.72857  | YES | YES |
| 49 | a | 3118.74 | 4.25033  | YES | YES |
| 50 | a | 3126.18 | 0.91898  | YES | YES |

**[PhSe]+**

bp86-d3 energy (au): -2632.7085547570

Zero point energy (au): 0.0876113

Entropy (kJ mol<sup>-1</sup>): 0.33945Chemical potential (kJ mol<sup>-1</sup>): 147.35

XYZ coordinates:

12

|    |          |          |          |
|----|----------|----------|----------|
| C  | -3.00873 | -0.00007 | -0.00008 |
| H  | -4.11243 | -0.00013 | -0.00037 |
| C  | -0.93370 | 1.25859  | 0.00000  |
| H  | -0.36827 | 2.20459  | -0.00005 |
| C  | -2.31983 | 1.24540  | 0.00017  |
| H  | -2.89039 | 2.18771  | 0.00048  |
| C  | -0.20121 | 0.00001  | -0.00004 |
| C  | -0.93361 | -1.25861 | 0.00002  |
| H  | -0.36815 | -2.20460 | 0.00003  |
| C  | -2.31975 | -1.24550 | 0.00014  |
| H  | -2.89025 | -2.18784 | 0.00009  |
| Se | 1.61530  | 0.00010  | 0.00006  |

Vibrational Spectrum:

| #  | mode | symmetry             | wave number | IR intensity | selection rules |
|----|------|----------------------|-------------|--------------|-----------------|
| #  |      | cm <sup>**(-1)</sup> | km/mol      | IR           | RAMAN           |
| 1  |      | 0.00                 | 0.00000     | -            | -               |
| 2  |      | 0.00                 | 0.00000     | -            | -               |
| 3  |      | 0.00                 | 0.00000     | -            | -               |
| 4  |      | 0.00                 | 0.00000     | -            | -               |
| 5  |      | 0.00                 | 0.00000     | -            | -               |
| 6  |      | 0.00                 | 0.00000     | -            | -               |
| 7  | a    | 98.48                | 0.03634     | YES          | YES             |
| 8  | a    | 245.70               | 0.00012     | YES          | YES             |
| 9  | a    | 320.25               | 0.00000     | YES          | YES             |
| 10 | a    | 332.82               | 0.01790     | YES          | YES             |
| 11 | a    | 377.28               | 0.00470     | YES          | YES             |
| 12 | a    | 569.14               | 1.90212     | YES          | YES             |
| 13 | a    | 617.24               | 44.10139    | YES          | YES             |
| 14 | a    | 683.75               | 2.81686     | YES          | YES             |
| 15 | a    | 774.51               | 28.66936    | YES          | YES             |
| 16 | a    | 803.40               | 0.00001     | YES          | YES             |
| 17 | a    | 966.99               | 10.95317    | YES          | YES             |
| 18 | a    | 970.61               | 0.79099     | YES          | YES             |
| 19 | a    | 988.95               | 0.00006     | YES          | YES             |
| 20 | a    | 991.67               | 7.35393     | YES          | YES             |
| 21 | a    | 1020.49              | 1.14774     | YES          | YES             |
| 22 | a    | 1061.17              | 27.33189    | YES          | YES             |
| 23 | a    | 1074.93              | 4.69664     | YES          | YES             |
| 24 | a    | 1149.25              | 8.25896     | YES          | YES             |
| 25 | a    | 1171.71              | 2.67890     | YES          | YES             |
| 26 | a    | 1248.63              | 8.37431     | YES          | YES             |

|    |   |         |           |     |     |
|----|---|---------|-----------|-----|-----|
| 27 | a | 1355.09 | 0.00104   | YES | YES |
| 28 | a | 1415.42 | 13.73272  | YES | YES |
| 29 | a | 1453.76 | 90.14781  | YES | YES |
| 30 | a | 1506.65 | 6.12037   | YES | YES |
| 31 | a | 1602.18 | 140.24812 | YES | YES |
| 32 | a | 3118.51 | 0.16997   | YES | YES |
| 33 | a | 3127.97 | 1.81433   | YES | YES |
| 34 | a | 3129.99 | 9.15290   | YES | YES |
| 35 | a | 3138.82 | 14.73619  | YES | YES |
| 36 | a | 3141.57 | 0.42953   | YES | YES |



## PhSeCl.GaCl3\_iso2

bp86-d3 energy (au): -6398.5502833220

Zero point energy (au): 0.0937974

Entropy (kJ mol<sup>-1</sup>): 0.57719

Chemical potential (kJ mol<sup>-1</sup>): 117.57

XYZ coordinates:

17

|    |          |          |          |
|----|----------|----------|----------|
| Se | 0.48437  | 0.48930  | 1.58748  |
| C  | -1.11604 | -0.29949 | 0.92371  |
| C  | -1.13764 | -0.85742 | -0.37720 |
| H  | -0.21191 | -0.89268 | -0.97255 |
| C  | -2.33749 | -1.38149 | -0.87797 |
| H  | -2.36147 | -1.82199 | -1.88785 |
| C  | -3.50719 | -1.34334 | -0.09450 |
| H  | -4.44865 | -1.75321 | -0.49621 |
| C  | -3.48346 | -0.79030 | 1.20015  |
| H  | -4.40098 | -0.76831 | 1.81020  |
| C  | -2.28731 | -0.27447 | 1.71893  |
| H  | -2.25145 | 0.14896  | 2.73529  |
| Ga | 3.35550  | -1.70092 | 0.65145  |
| Cl | 1.53215  | -1.42031 | 2.36951  |
| Cl | 4.37500  | -3.34229 | 1.62448  |
| Cl | 4.23466  | 0.27649  | 0.74205  |
| Cl | 2.20592  | -2.17153 | -1.13498 |

Vibrational Spectrum (first 50 lines):

| #  | mode | symmetry             | wave number | IR intensity | selection rules |
|----|------|----------------------|-------------|--------------|-----------------|
| #  |      | cm <sup>**(-1)</sup> | km/mol      | IR           | RAMAN           |
| 1  |      | 0.00                 | 0.00000     | -            | -               |
| 2  |      | 0.00                 | 0.00000     | -            | -               |
| 3  |      | 0.00                 | 0.00000     | -            | -               |
| 4  |      | 0.00                 | 0.00000     | -            | -               |
| 5  |      | 0.00                 | 0.00000     | -            | -               |
| 6  |      | 0.00                 | 0.00000     | -            | -               |
| 7  | a    | 14.91                | 0.10925     | YES          | YES             |
| 8  | a    | 22.42                | 0.01546     | YES          | YES             |
| 9  | a    | 41.79                | 0.42634     | YES          | YES             |
| 10 | a    | 54.75                | 0.94806     | YES          | YES             |
| 11 | a    | 57.96                | 0.06013     | YES          | YES             |
| 12 | a    | 78.90                | 0.50431     | YES          | YES             |
| 13 | a    | 98.50                | 0.15225     | YES          | YES             |
| 14 | a    | 122.41               | 4.75279     | YES          | YES             |
| 15 | a    | 126.65               | 5.94796     | YES          | YES             |
| 16 | a    | 138.27               | 28.81732    | YES          | YES             |
| 17 | a    | 180.66               | 37.22236    | YES          | YES             |
| 18 | a    | 202.40               | 22.14102    | YES          | YES             |
| 19 | a    | 236.61               | 0.79937     | YES          | YES             |

|    |   |         |          |     |     |
|----|---|---------|----------|-----|-----|
| 20 | a | 295.36  | 44.49963 | YES | YES |
| 21 | a | 312.39  | 2.15356  | YES | YES |
| 22 | a | 345.55  | 5.41908  | YES | YES |
| 23 | a | 398.17  | 1.94074  | YES | YES |
| 24 | a | 419.53  | 63.86076 | YES | YES |
| 25 | a | 431.41  | 59.20638 | YES | YES |
| 26 | a | 461.41  | 9.11098  | YES | YES |
| 27 | a | 602.33  | 0.25795  | YES | YES |
| 28 | a | 674.17  | 0.69432  | YES | YES |
| 29 | a | 683.72  | 33.49550 | YES | YES |
| 30 | a | 746.19  | 29.33471 | YES | YES |
| 31 | a | 829.07  | 0.50347  | YES | YES |
| 32 | a | 922.57  | 2.94806  | YES | YES |
| 33 | a | 964.93  | 0.53085  | YES | YES |
| 34 | a | 982.28  | 0.89963  | YES | YES |
| 35 | a | 994.99  | 0.27844  | YES | YES |
| 36 | a | 1015.37 | 1.34465  | YES | YES |
| 37 | a | 1053.17 | 37.41026 | YES | YES |
| 38 | a | 1071.16 | 3.29044  | YES | YES |
| 39 | a | 1146.33 | 0.21730  | YES | YES |
| 40 | a | 1162.27 | 6.06721  | YES | YES |
| 41 | a | 1285.02 | 1.84704  | YES | YES |
| 42 | a | 1366.01 | 4.02916  | YES | YES |
| 43 | a | 1431.81 | 16.96160 | YES | YES |
| 44 | a | 1455.29 | 0.51206  | YES | YES |
| 45 | a | 1577.36 | 0.11179  | YES | YES |
| 46 | a | 1587.91 | 29.29802 | YES | YES |
| 47 | a | 3100.36 | 0.66925  | YES | YES |
| 48 | a | 3110.80 | 6.47512  | YES | YES |
| 49 | a | 3117.43 | 4.37290  | YES | YES |
| 50 | a | 3124.19 | 0.75212  | YES | YES |

## [PhSe(PPh3)]<sup>+</sup>

bp86-d3 energy (au): -3668.6392661930

Zero point energy (au): 0.3575188

Entropy (kJ mol<sup>-1</sup>): 0.70100

Chemical potential (kJ mol<sup>-1</sup>): 793.64

XYZ coordinates:

46

|    |          |          |          |
|----|----------|----------|----------|
| C  | -1.03016 | 5.03770  | -1.15434 |
| H  | -1.25897 | 6.08166  | -1.42269 |
| C  | 2.75060  | -1.82211 | -1.68876 |
| H  | 3.22085  | -2.78446 | -1.43147 |
| Se | -2.01254 | -0.46924 | -0.25725 |
| P  | -0.05258 | 0.66535  | -0.03839 |
| C  | 2.48545  | 0.06477  | -3.21099 |
| H  | 2.75622  | 0.58414  | -4.14413 |
| C  | -1.48983 | 3.98836  | -1.97136 |
| H  | -2.07821 | 4.20729  | -2.87663 |
| C  | -0.45282 | 2.38084  | -0.46745 |
| C  | 1.81236  | -1.25807 | -0.81281 |
| H  | 1.55694  | -1.77896 | 0.12407  |
| C  | 1.46821  | 0.62196  | 4.32358  |
| H  | 1.82934  | 0.63259  | 5.36459  |
| C  | 1.20775  | -0.02070 | -1.14321 |
| C  | -0.27068 | -4.20252 | -1.13315 |
| H  | -0.03536 | -4.78052 | -2.04129 |
| C  | -1.20631 | 2.65681  | -1.63355 |
| H  | -1.57328 | 1.83731  | -2.27356 |
| C  | 0.54822  | 0.58075  | 1.67325  |
| C  | 0.08548  | 0.60380  | 4.06166  |
| H  | -0.63638 | 0.60295  | 4.89393  |
| C  | 1.54335  | 0.64131  | -2.34598 |
| H  | 1.08445  | 1.60921  | -2.60287 |
| C  | 3.08599  | -1.16489 | -2.88575 |
| H  | 3.82575  | -1.61201 | -3.56933 |
| C  | 0.00558  | 3.43254  | 0.35727  |
| H  | 0.58358  | 3.21774  | 1.27035  |
| C  | 1.93772  | 0.60739  | 1.93306  |
| H  | 2.66468  | 0.61495  | 1.10544  |
| C  | -0.37993 | 0.58369  | 2.73879  |
| H  | -1.46277 | 0.56249  | 2.53267  |
| C  | -0.88737 | -2.72888 | 1.19306  |
| H  | -1.13077 | -2.15250 | 2.09918  |
| C  | -0.28629 | 4.75991  | 0.00595  |
| H  | 0.06749  | 5.58248  | 0.64768  |
| C  | 2.39033  | 0.62626  | 3.26229  |
| H  | 3.47260  | 0.64369  | 3.46787  |
| C  | -0.24792 | -3.97559 | 1.29543  |
| H  | 0.00310  | -4.37834 | 2.28992  |
| C  | -0.89657 | -2.95022 | -1.25142 |
| H  | -1.13580 | -2.53791 | -2.24403 |
| C  | 0.06006  | -4.71039 | 0.13538  |
| H  | 0.55527  | -5.69103 | 0.22245  |

C -1.19883 -2.22141 -0.08451

Vibrational Spectrum (first 50 lines):

| #  | mode | symmetry | wave number | IR intensity | selection rules |
|----|------|----------|-------------|--------------|-----------------|
| #  |      | cm**(-1) | km/mol      | IR           | RAMAN           |
| 1  |      | 0.00     | 0.00000     | -            | -               |
| 2  |      | 0.00     | 0.00000     | -            | -               |
| 3  |      | 0.00     | 0.00000     | -            | -               |
| 4  |      | 0.00     | 0.00000     | -            | -               |
| 5  |      | 0.00     | 0.00000     | -            | -               |
| 6  |      | 0.00     | 0.00000     | -            | -               |
| 7  | a    | 21.18    | 0.08224     | YES          | YES             |
| 8  | a    | 33.59    | 0.01209     | YES          | YES             |
| 9  | a    | 41.66    | 0.22718     | YES          | YES             |
| 10 | a    | 47.53    | 0.15231     | YES          | YES             |
| 11 | a    | 50.70    | 0.06720     | YES          | YES             |
| 12 | a    | 57.65    | 0.21090     | YES          | YES             |
| 13 | a    | 63.24    | 0.08592     | YES          | YES             |
| 14 | a    | 71.20    | 0.13913     | YES          | YES             |
| 15 | a    | 86.57    | 0.09558     | YES          | YES             |
| 16 | a    | 91.85    | 0.48615     | YES          | YES             |
| 17 | a    | 103.08   | 0.32158     | YES          | YES             |
| 18 | a    | 187.28   | 1.61935     | YES          | YES             |
| 19 | a    | 191.72   | 1.65262     | YES          | YES             |
| 20 | a    | 207.58   | 1.49461     | YES          | YES             |
| 21 | a    | 216.01   | 0.35408     | YES          | YES             |
| 22 | a    | 230.71   | 1.29565     | YES          | YES             |
| 23 | a    | 241.29   | 0.55658     | YES          | YES             |
| 24 | a    | 245.39   | 0.79255     | YES          | YES             |
| 25 | a    | 256.98   | 0.39735     | YES          | YES             |
| 26 | a    | 270.49   | 0.27397     | YES          | YES             |
| 27 | a    | 298.93   | 0.65272     | YES          | YES             |
| 28 | a    | 393.50   | 0.13428     | YES          | YES             |
| 29 | a    | 394.75   | 0.03223     | YES          | YES             |
| 30 | a    | 399.06   | 0.09599     | YES          | YES             |
| 31 | a    | 404.39   | 0.21739     | YES          | YES             |
| 32 | a    | 420.22   | 7.19357     | YES          | YES             |
| 33 | a    | 437.71   | 8.04960     | YES          | YES             |
| 34 | a    | 446.17   | 7.42868     | YES          | YES             |
| 35 | a    | 466.04   | 6.24596     | YES          | YES             |
| 36 | a    | 492.91   | 49.04195    | YES          | YES             |
| 37 | a    | 507.33   | 76.41560    | YES          | YES             |
| 38 | a    | 520.46   | 69.82763    | YES          | YES             |
| 39 | a    | 602.48   | 0.00747     | YES          | YES             |
| 40 | a    | 605.07   | 0.49298     | YES          | YES             |
| 41 | a    | 605.88   | 0.11882     | YES          | YES             |
| 42 | a    | 606.53   | 0.07640     | YES          | YES             |
| 43 | a    | 661.14   | 1.96540     | YES          | YES             |
| 44 | a    | 678.50   | 4.19703     | YES          | YES             |
| 45 | a    | 690.41   | 20.87784    | YES          | YES             |
| 46 | a    | 693.04   | 44.31371    | YES          | YES             |
| 47 | a    | 694.62   | 24.96476    | YES          | YES             |
| 48 | a    | 697.59   | 8.43865     | YES          | YES             |
| 49 | a    | 712.06   | 20.48446    | YES          | YES             |
| 50 | a    | 712.92   | 30.78314    | YES          | YES             |

**[PhSe(PPh3).PPh3]<sup>+</sup>**

bp86-d3 energy (au): -4704.4492770190

Zero point energy (au): 0.6246469

Entropy (kJ mol<sup>-1</sup>): 1.09850

Chemical potential (kJ mol<sup>-1</sup>): 1425.06

XYZ coordinates:

80

|    |          |          |          |
|----|----------|----------|----------|
| C  | -4.72540 | 0.76239  | 3.98994  |
| H  | -5.76085 | 0.94851  | 4.31849  |
| C  | 2.93990  | 2.20322  | 3.57757  |
| H  | 4.02853  | 2.11255  | 3.43273  |
| Se | -0.52237 | 0.00469  | -0.00390 |
| P  | -0.37983 | 0.01228  | 2.56345  |
| C  | 1.01348  | 3.42881  | 4.42386  |
| H  | 0.58982  | 4.29886  | 4.95121  |
| C  | -4.16892 | 1.53279  | 2.95308  |
| H  | -4.76520 | 2.32234  | 2.46766  |
| C  | -2.08257 | 0.28445  | 3.15326  |
| C  | 2.09349  | 1.19625  | 3.09214  |
| H  | 2.52480  | 0.32367  | 2.57501  |
| C  | 0.95506  | -4.13914 | 4.14291  |
| H  | 1.26210  | -5.13278 | 4.50766  |
| C  | 0.69361  | 1.30061  | 3.27859  |
| C  | 3.52138  | 1.20239  | -0.22700 |
| H  | 4.06847  | 2.14110  | -0.41097 |
| C  | -2.85315 | 1.29229  | 2.52759  |
| H  | -2.42101 | 1.89138  | 1.70798  |
| C  | 0.17802  | -1.60050 | 3.20959  |
| C  | 0.14199  | -4.03023 | 2.99966  |
| H  | -0.19004 | -4.93679 | 2.46800  |
| C  | 0.15650  | 2.42374  | 3.94593  |
| H  | -0.93059 | 2.51044  | 4.10340  |
| C  | 2.40303  | 3.32205  | 4.24051  |
| H  | 3.07153  | 4.11219  | 4.61925  |
| C  | -2.64405 | -0.48980 | 4.19201  |
| H  | -2.05011 | -1.28117 | 4.67734  |
| C  | 0.98856  | -1.71168 | 4.36016  |
| H  | 1.31723  | -0.80818 | 4.89830  |
| C  | -0.24310 | -2.76589 | 2.52921  |
| H  | -0.86769 | -2.67847 | 1.62423  |
| C  | 2.11606  | -1.19448 | 0.24221  |
| H  | 1.56515  | -2.13210 | 0.41211  |
| C  | -3.96420 | -0.24762 | 4.60491  |
| H  | -4.40118 | -0.85206 | 5.41626  |
| C  | 1.37560  | -2.98145 | 4.82029  |
| H  | 2.00824  | -3.06529 | 5.71882  |
| C  | 3.52117  | -1.18545 | 0.25999  |
| H  | 4.06811  | -2.12311 | 0.44952  |
| C  | 2.11609  | 1.20858  | -0.22395 |
| H  | 1.56516  | 2.14516  | -0.39957 |
| C  | 4.22394  | 0.00919  | 0.02035  |

|   |          |          |          |
|---|----------|----------|----------|
| H | 5.32603  | 0.01039  | 0.02665  |
| C | 1.41823  | 0.00635  | 0.00555  |
| C | -4.68399 | -0.79262 | -4.03056 |
| H | -5.71456 | -0.98588 | -4.37004 |
| C | 2.98400  | -2.19242 | -3.52937 |
| H | 4.07160  | -2.08904 | -3.38539 |
| P | -0.35757 | -0.01319 | -2.56182 |
| C | 1.06959  | -3.45262 | -4.35183 |
| H | 0.65422  | -4.33751 | -4.86074 |
| C | -4.14034 | -1.54550 | -2.97431 |
| H | -4.74231 | -2.32736 | -2.48353 |
| C | -2.05280 | -0.29802 | -3.16734 |
| C | 2.12814  | -1.18326 | -3.06550 |
| H | 2.55096  | -0.29694 | -2.56483 |
| C | 0.97655  | 4.12867  | -4.16610 |
| H | 1.28320  | 5.12000  | -4.53730 |
| C | 0.72950  | -1.30373 | -3.25158 |
| C | -2.83023 | -1.29706 | -2.53593 |
| H | -2.40814 | -1.88280 | -1.70154 |
| C | 0.20095  | 1.59604  | -3.21591 |
| C | 0.16421  | 4.02692  | -3.02175 |
| H | -0.16745 | 4.93676  | -2.49558 |
| C | 0.20317  | -2.44545 | -3.89582 |
| H | -0.88305 | -2.54542 | -4.05210 |
| C | 2.45797  | -3.32941 | -4.16967 |
| H | 3.13407  | -4.12073 | -4.53203 |
| C | -2.60171 | 0.45902  | -4.22548 |
| H | -2.00258 | 1.24372  | -4.71543 |
| C | 1.01068  | 1.69996  | -4.36796 |
| H | 1.33949  | 0.79299  | -4.90036 |
| C | -0.22062 | 2.76557  | -2.54309 |
| H | -0.84542 | 2.68369  | -1.63770 |
| C | -3.91608 | 0.20861  | -4.65151 |
| H | -4.34346 | 0.80014  | -5.47734 |
| C | 1.39701  | 2.96685  | -4.83648 |
| H | 2.02922  | 3.04513  | -5.73584 |

Vibrational Spectrum (first 50 lines):

| #  | mode | symmetry | wave number | IR intensity | selection rules |
|----|------|----------|-------------|--------------|-----------------|
| #  |      | cm**(-1) | km/mol      | IR           | RAMAN           |
| 1  |      | 0.00     | 0.00000     | -            | -               |
| 2  |      | 0.00     | 0.00000     | -            | -               |
| 3  |      | 0.00     | 0.00000     | -            | -               |
| 4  |      | 0.00     | 0.00000     | -            | -               |
| 5  |      | 0.00     | 0.00000     | -            | -               |
| 6  |      | 0.00     | 0.00000     | -            | -               |
| 7  | a    | 9.82     | 0.00185     | YES          | YES             |
| 8  | a    | 11.67    | 0.12784     | YES          | YES             |
| 9  | a    | 19.78    | 0.00869     | YES          | YES             |
| 10 | a    | 27.45    | 0.02841     | YES          | YES             |
| 11 | a    | 28.69    | 0.00051     | YES          | YES             |
| 12 | a    | 30.32    | 0.03207     | YES          | YES             |
| 13 | a    | 37.88    | 0.02763     | YES          | YES             |
| 14 | a    | 40.87    | 0.12217     | YES          | YES             |
| 15 | a    | 41.80    | 2.56135     | YES          | YES             |
| 16 | a    | 46.17    | 0.07199     | YES          | YES             |

|    |   |        |          |     |     |
|----|---|--------|----------|-----|-----|
| 17 | a | 47.81  | 2.98025  | YES | YES |
| 18 | a | 50.13  | 2.48620  | YES | YES |
| 19 | a | 53.89  | 0.46315  | YES | YES |
| 20 | a | 58.17  | 0.04022  | YES | YES |
| 21 | a | 59.82  | 0.01247  | YES | YES |
| 22 | a | 64.64  | 16.65256 | YES | YES |
| 23 | a | 74.62  | 0.03550  | YES | YES |
| 24 | a | 80.14  | 0.03730  | YES | YES |
| 25 | a | 85.45  | 37.01558 | YES | YES |
| 26 | a | 94.97  | 0.04067  | YES | YES |
| 27 | a | 100.94 | 89.07462 | YES | YES |
| 28 | a | 104.59 | 0.12209  | YES | YES |
| 29 | a | 115.95 | 1.18782  | YES | YES |
| 30 | a | 125.10 | 0.10082  | YES | YES |
| 31 | a | 184.44 | 2.50071  | YES | YES |
| 32 | a | 185.27 | 0.47879  | YES | YES |
| 33 | a | 194.69 | 0.08360  | YES | YES |
| 34 | a | 195.77 | 4.73525  | YES | YES |
| 35 | a | 204.49 | 1.26848  | YES | YES |
| 36 | a | 205.95 | 3.35746  | YES | YES |
| 37 | a | 220.68 | 12.14932 | YES | YES |
| 38 | a | 238.08 | 7.33413  | YES | YES |
| 39 | a | 238.97 | 0.45796  | YES | YES |
| 40 | a | 240.00 | 0.05790  | YES | YES |
| 41 | a | 253.78 | 0.10006  | YES | YES |
| 42 | a | 254.49 | 1.57173  | YES | YES |
| 43 | a | 265.90 | 0.98981  | YES | YES |
| 44 | a | 266.67 | 0.14756  | YES | YES |
| 45 | a | 306.93 | 0.01850  | YES | YES |
| 46 | a | 393.17 | 0.07531  | YES | YES |
| 47 | a | 393.51 | 0.10457  | YES | YES |
| 48 | a | 394.32 | 1.07868  | YES | YES |
| 49 | a | 394.79 | 0.21548  | YES | YES |
| 50 | a | 395.96 | 0.38292  | YES | YES |

**[PhSe(PtBu3).PPh3]+**

bp86-d3 energy (au): -4483.1448695850

Zero point energy (au): 0.7158782

Entropy (kJ mol<sup>-1</sup>): 1.07716

Chemical potential (kJ mol<sup>-1</sup>): 1676.02

XYZ coordinates:

86

|    |          |          |          |
|----|----------|----------|----------|
| P  | -2.06000 | 0.39231  | -0.02955 |
| Se | 0.51943  | 0.24659  | -0.01159 |
| C  | 0.27007  | -1.68248 | 0.02236  |
| C  | -0.08794 | -2.34263 | -1.17199 |
| H  | -0.17195 | -1.77672 | -2.11293 |
| C  | -0.35487 | -3.72195 | -1.15300 |
| H  | -0.64229 | -4.23231 | -2.08643 |
| C  | -0.25260 | -4.44573 | 0.04890  |
| H  | -0.45580 | -5.52874 | 0.05931  |
| C  | 0.09962  | -3.78372 | 1.23735  |
| H  | 0.16499  | -4.34240 | 2.18502  |
| C  | 0.34916  | -2.40008 | 1.23063  |
| H  | 0.58803  | -1.88202 | 2.17006  |
| C  | -2.95798 | -0.53658 | 1.25498  |
| C  | -2.94580 | -1.95109 | 1.19225  |
| H  | -2.45500 | -2.46790 | 0.35152  |
| C  | -3.57225 | -2.70087 | 2.19785  |
| H  | -3.56329 | -3.80126 | 2.13932  |
| C  | -4.20261 | -2.05296 | 3.27585  |
| H  | -4.69166 | -2.64541 | 4.06611  |
| C  | -4.21167 | -0.64877 | 3.34237  |
| H  | -4.71200 | -0.13777 | 4.18095  |
| C  | -3.59284 | 0.11235  | 2.33700  |
| H  | -3.61363 | 1.21269  | 2.39108  |
| C  | -2.37260 | 2.17255  | 0.21874  |
| C  | -3.27156 | 2.89546  | -0.59521 |
| H  | -3.82604 | 2.38260  | -1.39778 |
| C  | -3.45700 | 4.27090  | -0.37964 |
| H  | -4.16003 | 4.83246  | -1.01590 |
| C  | -2.75352 | 4.92885  | 0.64488  |
| H  | -2.90404 | 6.00800  | 0.81079  |
| C  | -1.85680 | 4.21158  | 1.45749  |
| H  | -1.30538 | 4.72608  | 2.26116  |
| C  | -1.65842 | 2.83861  | 1.24328  |
| H  | -0.95086 | 2.27844  | 1.87822  |
| C  | -2.76097 | -0.06518 | -1.65113 |
| C  | -3.99141 | -0.74440 | -1.78273 |
| H  | -4.57226 | -1.02033 | -0.88795 |
| C  | -4.47758 | -1.06685 | -3.06113 |
| H  | -5.43879 | -1.59692 | -3.15978 |
| C  | -3.74718 | -0.71047 | -4.20795 |
| H  | -4.13326 | -0.96489 | -5.20833 |
| C  | -2.52295 | -0.02830 | -4.07909 |
| H  | -1.94957 | 0.25362  | -4.97718 |
| C  | -2.02605 | 0.28926  | -2.80625 |
| H  | -1.05946 | 0.81138  | -2.70374 |



|   |         |          |          |
|---|---------|----------|----------|
| P | 3.12206 | 0.28747  | 0.02610  |
| C | 3.49229 | 1.79299  | -1.14384 |
| C | 4.87964 | 2.42486  | -0.89698 |
| H | 5.05285 | 3.21120  | -1.66676 |
| C | 2.39781 | 2.87928  | -0.97161 |
| H | 2.64728 | 3.72607  | -1.65069 |
| H | 2.32760 | 3.29533  | 0.04963  |
| H | 1.39340 | 2.51111  | -1.27164 |
| C | 3.58619 | 0.73471  | 1.85613  |
| C | 5.10149 | 0.65151  | 2.14134  |
| H | 5.28729 | 0.99900  | 3.18351  |
| H | 5.70279 | 1.29419  | 1.46760  |
| H | 5.48966 | -0.38546 | 2.07490  |
| H | 3.05573 | -1.28715 | 2.65891  |
| H | 1.72210 | -0.07862 | 2.70678  |
| H | 3.09588 | 0.03879  | 3.85541  |
| C | 3.08317 | 2.15988  | 2.18361  |
| H | 1.99971 | 2.28137  | 1.96464  |
| H | 3.65086 | 2.95431  | 1.65926  |
| H | 3.21894 | 2.33140  | 3.27546  |
| C | 4.08572 | -1.29151 | -0.56583 |
| C | 4.01058 | -2.36890 | 0.54036  |
| H | 4.45404 | -3.30744 | 0.13801  |
| H | 2.96270 | -2.59865 | 0.82804  |
| H | 4.59034 | -2.10331 | 1.44728  |
| C | 5.56434 | -1.00846 | -0.90814 |
| H | 6.13049 | -0.56722 | -0.06376 |
| H | 5.67600 | -0.34656 | -1.79076 |
| H | 6.05440 | -1.97543 | -1.16628 |
| C | 3.37343 | -1.88157 | -1.80729 |
| H | 3.41701 | -1.22894 | -2.69793 |
| H | 2.31318 | -2.12534 | -1.59673 |
| H | 3.88403 | -2.83401 | -2.07721 |
| H | 4.94900 | 2.92164  | 0.09222  |
| H | 5.70918 | 1.69502  | -0.98025 |
| C | 3.39642 | 1.31794  | -2.61175 |
| H | 3.44063 | 2.21374  | -3.27157 |
| H | 4.23503 | 0.65716  | -2.90926 |
| H | 2.43414 | 0.80046  | -2.81776 |
| C | 2.81967 | -0.21693 | 2.80703  |

Vibrational Spectrum (first 50 lines):

| #  | mode | symmetry | wave number | IR intensity | selection rules |
|----|------|----------|-------------|--------------|-----------------|
| #  |      | cm**(-1) | km/mol      | IR           | RAMAN           |
| 1  |      | 0.00     | 0.00000     | -            | -               |
| 2  |      | 0.00     | 0.00000     | -            | -               |
| 3  |      | 0.00     | 0.00000     | -            | -               |
| 4  |      | 0.00     | 0.00000     | -            | -               |
| 5  |      | 0.00     | 0.00000     | -            | -               |
| 6  |      | 0.00     | 0.00000     | -            | -               |
| 7  | a    | 14.53    | 0.05751     | YES          | YES             |
| 8  | a    | 16.09    | 0.30470     | YES          | YES             |
| 9  | a    | 22.36    | 0.10946     | YES          | YES             |
| 10 | a    | 23.53    | 0.05255     | YES          | YES             |
| 11 | a    | 40.07    | 1.84542     | YES          | YES             |
| 12 | a    | 42.53    | 1.60108     | YES          | YES             |

|    |   |        |          |     |     |
|----|---|--------|----------|-----|-----|
| 13 | a | 48.76  | 0.21770  | YES | YES |
| 14 | a | 51.54  | 0.27052  | YES | YES |
| 15 | a | 56.93  | 0.58064  | YES | YES |
| 16 | a | 59.69  | 6.83413  | YES | YES |
| 17 | a | 64.41  | 12.94037 | YES | YES |
| 18 | a | 75.30  | 3.52564  | YES | YES |
| 19 | a | 79.19  | 50.75650 | YES | YES |
| 20 | a | 84.80  | 3.79246  | YES | YES |
| 21 | a | 96.33  | 0.24863  | YES | YES |
| 22 | a | 99.33  | 0.21237  | YES | YES |
| 23 | a | 101.12 | 10.48168 | YES | YES |
| 24 | a | 110.60 | 26.32649 | YES | YES |
| 25 | a | 120.89 | 0.28130  | YES | YES |
| 26 | a | 126.75 | 0.20136  | YES | YES |
| 27 | a | 130.22 | 0.62904  | YES | YES |
| 28 | a | 169.45 | 0.12635  | YES | YES |
| 29 | a | 186.07 | 0.98397  | YES | YES |
| 30 | a | 190.65 | 0.24054  | YES | YES |
| 31 | a | 195.18 | 1.03127  | YES | YES |
| 32 | a | 197.50 | 2.16851  | YES | YES |
| 33 | a | 202.56 | 1.04701  | YES | YES |
| 34 | a | 204.56 | 0.71344  | YES | YES |
| 35 | a | 209.96 | 0.65247  | YES | YES |
| 36 | a | 212.67 | 0.35926  | YES | YES |
| 37 | a | 223.37 | 14.63232 | YES | YES |
| 38 | a | 236.22 | 5.08841  | YES | YES |
| 39 | a | 238.52 | 0.61282  | YES | YES |
| 40 | a | 241.13 | 0.16744  | YES | YES |
| 41 | a | 249.35 | 1.57257  | YES | YES |
| 42 | a | 256.11 | 0.90689  | YES | YES |
| 43 | a | 256.92 | 0.34352  | YES | YES |
| 44 | a | 259.71 | 0.08091  | YES | YES |
| 45 | a | 262.90 | 0.41841  | YES | YES |
| 46 | a | 265.50 | 0.75888  | YES | YES |
| 47 | a | 277.94 | 0.61046  | YES | YES |
| 48 | a | 287.19 | 0.72795  | YES | YES |
| 49 | a | 289.89 | 0.34367  | YES | YES |
| 50 | a | 305.33 | 1.22120  | YES | YES |

**[PhSe(PPh3).PtBu3]+\_iso1**

bp86-d3 energy (au): -4483.1449579760

Zero point energy (au): 0.7159353

Entropy (kJ mol<sup>-1</sup>): 1.07382

Chemical potential (kJ mol<sup>-1</sup>): 1676.99

XYZ coordinates:

86

|    |          |          |          |
|----|----------|----------|----------|
| P  | -2.05013 | 0.38567  | 0.02494  |
| Se | 0.52689  | 0.24054  | 0.00617  |
| C  | 0.27717  | -1.68906 | -0.01451 |
| C  | -0.09419 | -2.31500 | -1.22318 |
| H  | -0.19107 | -1.72238 | -2.14617 |
| C  | -0.35793 | -3.69499 | -1.24126 |
| H  | -0.65490 | -4.17865 | -2.18585 |
| C  | -0.24046 | -4.45329 | -0.06220 |
| H  | -0.44059 | -5.53673 | -0.08130 |
| C  | 0.12216  | -3.82502 | 1.14134  |
| H  | 0.19699  | -4.41015 | 2.07211  |
| C  | 0.36934  | -2.44127 | 1.17169  |
| H  | 0.61496  | -1.94947 | 2.12332  |
| C  | -2.93473 | -0.57858 | 1.29276  |
| C  | -2.92434 | -1.99075 | 1.19002  |
| H  | -2.44157 | -2.48413 | 0.33069  |
| C  | -3.54205 | -2.76819 | 2.17994  |
| H  | -3.53401 | -3.86652 | 2.09066  |
| C  | -4.16171 | -2.15053 | 3.28164  |
| H  | -4.64462 | -2.76471 | 4.05897  |
| C  | -4.16864 | -0.74880 | 3.38799  |
| H  | -4.66088 | -0.26137 | 4.24517  |
| C  | -3.55849 | 0.03998  | 2.39878  |
| H  | -3.57698 | 1.13836  | 2.48456  |
| C  | -2.35827 | 2.15855  | 0.32538  |
| C  | -3.26085 | 2.90538  | -0.46244 |
| H  | -3.82239 | 2.41572  | -1.27451 |
| C  | -3.44032 | 4.27522  | -0.20935 |
| H  | -4.14605 | 4.85543  | -0.82559 |
| C  | -2.72719 | 4.90373  | 0.82689  |
| H  | -2.87318 | 5.97852  | 1.02251  |
| C  | -1.82678 | 4.16248  | 1.61351  |
| H  | -1.26753 | 4.65412  | 2.42605  |
| C  | -1.63418 | 2.79511  | 1.36162  |
| H  | -0.92274 | 2.21639  | 1.97523  |
| C  | -2.77070 | -0.02616 | -1.60056 |
| C  | -4.00654 | -0.69498 | -1.73561 |
| H  | -4.57835 | -0.99141 | -0.84160 |
| C  | -4.50971 | -0.98016 | -3.01626 |
| H  | -5.47522 | -1.50180 | -3.11755 |
| C  | -3.79056 | -0.59765 | -4.16180 |
| H  | -4.18956 | -0.82364 | -5.16394 |
| C  | -2.56077 | 0.07374  | -4.02939 |
| H  | -1.99624 | 0.37622  | -4.92643 |
| C  | -2.04730 | 0.35482  | -2.75451 |

|   |          |          |          |
|---|----------|----------|----------|
| H | -1.07671 | 0.86907  | -2.64965 |
| P | 3.13226  | 0.27985  | 0.00000  |
| C | 3.48230  | 1.83924  | -1.10411 |
| C | 4.87619  | 2.45594  | -0.85671 |
| H | 5.03385  | 3.28029  | -1.58925 |
| C | 2.39401  | 2.91699  | -0.85558 |
| H | 2.62735  | 3.79401  | -1.50129 |
| H | 2.35002  | 3.28587  | 0.18505  |
| H | 1.38188  | 2.56332  | -1.14709 |
| C | 3.63941  | 0.63738  | 1.83844  |
| C | 5.16025  | 0.53476  | 2.08549  |
| H | 5.37053  | 0.83137  | 3.13862  |
| H | 5.74985  | 1.20660  | 1.43013  |
| H | 5.54180  | -0.49942 | 1.96084  |
| H | 3.11037  | -1.41941 | 2.54908  |
| H | 1.79124  | -0.20315 | 2.69561  |
| H | 3.19551  | -0.15795 | 3.81146  |
| C | 3.15018  | 2.04689  | 2.24581  |
| H | 2.06342  | 2.18347  | 2.05388  |
| H | 3.71175  | 2.86388  | 1.75002  |
| H | 3.30807  | 2.16425  | 3.34197  |
| C | 4.07626  | -1.27136 | -0.68897 |
| C | 4.02135  | -2.40059 | 0.36561  |
| H | 4.45059  | -3.32055 | -0.09136 |
| H | 2.97924  | -2.63955 | 0.66704  |
| H | 4.62342  | -2.18110 | 1.27022  |
| C | 5.54800  | -0.97630 | -1.05056 |
| H | 6.13427  | -0.57540 | -0.19960 |
| H | 5.64258  | -0.27458 | -1.90403 |
| H | 6.02923  | -1.93131 | -1.36381 |
| C | 3.33378  | -1.79856 | -1.94093 |
| H | 3.35542  | -1.10250 | -2.79924 |
| H | 2.27905  | -2.05327 | -1.71656 |
| H | 3.83714  | -2.73583 | -2.27042 |
| H | 4.96931  | 2.90177  | 0.15458  |
| H | 5.70145  | 1.72995  | -0.99560 |
| C | 3.35462  | 1.43677  | -2.59121 |
| H | 3.38971  | 2.36340  | -3.20719 |
| H | 4.18397  | 0.78821  | -2.93773 |
| H | 2.38601  | 0.93351  | -2.80266 |
| C | 2.88945  | -0.35623 | 2.75893  |

Vibrational Spectrum (first 50 lines):

| #  | mode | symmetry | wave number | IR intensity | selection rules |
|----|------|----------|-------------|--------------|-----------------|
| #  |      | cm**(-1) | km/mol      | IR           | RAMAN           |
| 1  |      | 0.00     | 0.00000     | -            | -               |
| 2  |      | 0.00     | 0.00000     | -            | -               |
| 3  |      | 0.00     | 0.00000     | -            | -               |
| 4  |      | 0.00     | 0.00000     | -            | -               |
| 5  |      | 0.00     | 0.00000     | -            | -               |
| 6  |      | 0.00     | 0.00000     | -            | -               |
| 7  | a    | 14.51    | 0.18890     | YES          | YES             |
| 8  | a    | 19.01    | 0.08736     | YES          | YES             |
| 9  | a    | 22.12    | 0.01913     | YES          | YES             |
| 10 | a    | 23.81    | 0.03401     | YES          | YES             |
| 11 | a    | 39.76    | 1.69714     | YES          | YES             |

|    |   |        |          |     |     |
|----|---|--------|----------|-----|-----|
| 12 | a | 43.07  | 0.72429  | YES | YES |
| 13 | a | 49.17  | 0.21573  | YES | YES |
| 14 | a | 52.51  | 0.40483  | YES | YES |
| 15 | a | 57.00  | 0.30357  | YES | YES |
| 16 | a | 59.65  | 3.04814  | YES | YES |
| 17 | a | 64.29  | 14.55168 | YES | YES |
| 18 | a | 76.01  | 7.01226  | YES | YES |
| 19 | a | 80.13  | 44.84862 | YES | YES |
| 20 | a | 84.69  | 7.43313  | YES | YES |
| 21 | a | 97.45  | 0.31551  | YES | YES |
| 22 | a | 100.82 | 0.90663  | YES | YES |
| 23 | a | 101.70 | 10.21644 | YES | YES |
| 24 | a | 111.39 | 27.81139 | YES | YES |
| 25 | a | 122.52 | 0.53719  | YES | YES |
| 26 | a | 129.37 | 0.45343  | YES | YES |
| 27 | a | 130.44 | 0.18611  | YES | YES |
| 28 | a | 172.26 | 0.08249  | YES | YES |
| 29 | a | 186.26 | 1.01767  | YES | YES |
| 30 | a | 194.06 | 0.48233  | YES | YES |
| 31 | a | 196.40 | 1.44044  | YES | YES |
| 32 | a | 198.08 | 1.42628  | YES | YES |
| 33 | a | 203.54 | 0.72158  | YES | YES |
| 34 | a | 207.65 | 0.67918  | YES | YES |
| 35 | a | 211.04 | 0.84578  | YES | YES |
| 36 | a | 220.49 | 0.80103  | YES | YES |
| 37 | a | 223.69 | 14.19091 | YES | YES |
| 38 | a | 235.81 | 4.66947  | YES | YES |
| 39 | a | 237.88 | 2.70666  | YES | YES |
| 40 | a | 238.42 | 0.19335  | YES | YES |
| 41 | a | 249.08 | 0.87318  | YES | YES |
| 42 | a | 256.03 | 0.99504  | YES | YES |
| 43 | a | 258.39 | 0.27667  | YES | YES |
| 44 | a | 258.93 | 0.42761  | YES | YES |
| 45 | a | 263.90 | 0.03628  | YES | YES |
| 46 | a | 265.25 | 0.74886  | YES | YES |
| 47 | a | 278.03 | 0.64266  | YES | YES |
| 48 | a | 287.37 | 0.68078  | YES | YES |
| 49 | a | 290.14 | 0.23826  | YES | YES |
| 50 | a | 305.41 | 1.28756  | YES | YES |

**[PhSe(PtBu3)]+**

bp86-d3 energy (au): -3447.3362016530

Zero point energy (au): 0.4484289

Entropy (kJ mol<sup>-1</sup>): 0.68672

Chemical potential (kJ mol<sup>-1</sup>): 1042.13

XYZ coordinates:

52

|   |          |          |          |
|---|----------|----------|----------|
| P | 1.13004  | 0.10147  | -0.10517 |
| C | -4.81655 | 0.51798  | -0.47879 |
| H | -5.82068 | 0.83784  | -0.80018 |
| C | 1.67337  | 1.57515  | 1.03778  |
| C | -2.78224 | 0.93026  | 0.80157  |
| H | -2.21303 | 1.56146  | 1.49723  |
| C | 2.35997  | 1.01973  | 2.30587  |
| H | 2.53406  | 1.87417  | 2.99726  |
| H | 3.34875  | 0.56171  | 2.10598  |
| H | 1.71683  | 0.29269  | 2.84685  |
| C | -4.06039 | 1.33441  | 0.38072  |
| H | -4.47228 | 2.29025  | 0.74251  |
| C | 2.14945  | -2.28621 | -1.30532 |
| H | 2.86915  | -3.13230 | -1.23622 |
| H | 2.25830  | -1.85412 | -2.31991 |
| H | 1.12997  | -2.71191 | -1.19149 |
| C | -2.25357 | -0.28921 | 0.33459  |
| C | 2.49226  | -1.28635 | -0.17838 |
| C | -3.01622 | -1.12361 | -0.51038 |
| H | -2.61589 | -2.09288 | -0.84747 |
| C | -0.27829 | 1.97101  | -1.74627 |
| H | -0.63807 | 2.23017  | -2.76708 |
| H | 0.28317  | 2.85002  | -1.37198 |
| H | -1.17689 | 1.80894  | -1.11583 |
| C | 3.88469  | -0.66707 | -0.43629 |
| H | 4.60769  | -1.50278 | -0.57050 |
| H | 4.24990  | -0.06130 | 0.41723  |
| H | 3.92775  | -0.05036 | -1.35547 |
| C | -0.25883 | -0.37953 | -2.57630 |
| H | -1.21689 | -0.56033 | -2.05377 |
| H | 0.26088  | -1.34409 | -2.71555 |
| H | -0.50718 | 0.00744  | -3.58988 |
| C | 0.42421  | 2.34843  | 1.51663  |
| H | 0.77381  | 3.21433  | 2.12210  |
| H | -0.20614 | 1.71731  | 2.17720  |
| H | -0.20169 | 2.75189  | 0.69930  |
| C | 2.63550  | 2.53148  | 0.29752  |
| H | 2.13880  | 3.08504  | -0.52456 |
| H | 3.53526  | 2.02513  | -0.10551 |
| H | 2.99022  | 3.29135  | 1.02934  |
| C | 0.59255  | 0.69982  | -1.87009 |
| C | 2.51913  | -2.09210 | 1.14544  |
| H | 1.58183  | -2.66540 | 1.30956  |
| H | 2.73062  | -1.48566 | 2.04426  |
| H | 3.33691  | -2.84254 | 1.05932  |

|    |          |          |          |
|----|----------|----------|----------|
| C  | 1.84374  | 1.00795  | -2.72494 |
| H  | 1.49090  | 1.44010  | -3.68826 |
| H  | 2.42438  | 0.09763  | -2.97605 |
| H  | 2.52433  | 1.75156  | -2.26595 |
| C  | -4.29869 | -0.71433 | -0.91316 |
| H  | -4.89552 | -1.36782 | -1.56976 |
| Se | -0.56556 | -1.00343 | 0.98490  |

Vibrational Spectrum (first 50 lines):

| #  | mode | symmetry | wave number<br>cm <sup>**(-1)</sup> | IR intensity<br>km/mol | IR  | RAMAN |
|----|------|----------|-------------------------------------|------------------------|-----|-------|
| 1  |      |          | 0.00                                | 0.00000                | -   | -     |
| 2  |      |          | 0.00                                | 0.00000                | -   | -     |
| 3  |      |          | 0.00                                | 0.00000                | -   | -     |
| 4  |      |          | 0.00                                | 0.00000                | -   | -     |
| 5  |      |          | 0.00                                | 0.00000                | -   | -     |
| 6  |      |          | 0.00                                | 0.00000                | -   | -     |
| 7  | a    |          | 37.10                               | 0.22039                | YES | YES   |
| 8  | a    |          | 55.74                               | 0.25609                | YES | YES   |
| 9  | a    |          | 74.73                               | 0.24968                | YES | YES   |
| 10 | a    |          | 92.18                               | 0.24566                | YES | YES   |
| 11 | a    |          | 96.15                               | 0.29907                | YES | YES   |
| 12 | a    |          | 115.02                              | 0.17546                | YES | YES   |
| 13 | a    |          | 124.84                              | 0.11192                | YES | YES   |
| 14 | a    |          | 129.93                              | 0.14944                | YES | YES   |
| 15 | a    |          | 160.15                              | 0.44793                | YES | YES   |
| 16 | a    |          | 169.07                              | 0.12673                | YES | YES   |
| 17 | a    |          | 196.63                              | 0.41706                | YES | YES   |
| 18 | a    |          | 198.84                              | 1.05364                | YES | YES   |
| 19 | a    |          | 202.25                              | 0.95272                | YES | YES   |
| 20 | a    |          | 208.08                              | 0.72376                | YES | YES   |
| 21 | a    |          | 210.28                              | 0.34971                | YES | YES   |
| 22 | a    |          | 226.40                              | 0.11909                | YES | YES   |
| 23 | a    |          | 232.15                              | 0.35772                | YES | YES   |
| 24 | a    |          | 237.70                              | 0.39068                | YES | YES   |
| 25 | a    |          | 244.08                              | 0.42183                | YES | YES   |
| 26 | a    |          | 256.22                              | 0.40457                | YES | YES   |
| 27 | a    |          | 257.80                              | 0.10006                | YES | YES   |
| 28 | a    |          | 264.93                              | 0.25973                | YES | YES   |
| 29 | a    |          | 280.63                              | 0.21286                | YES | YES   |
| 30 | a    |          | 283.78                              | 0.07534                | YES | YES   |
| 31 | a    |          | 288.88                              | 0.28309                | YES | YES   |
| 32 | a    |          | 297.40                              | 0.07679                | YES | YES   |
| 33 | a    |          | 303.14                              | 1.56584                | YES | YES   |
| 34 | a    |          | 332.93                              | 0.45836                | YES | YES   |
| 35 | a    |          | 348.35                              | 0.52299                | YES | YES   |
| 36 | a    |          | 354.59                              | 0.55820                | YES | YES   |
| 37 | a    |          | 369.17                              | 1.24517                | YES | YES   |
| 38 | a    |          | 376.65                              | 0.09925                | YES | YES   |
| 39 | a    |          | 380.74                              | 0.17650                | YES | YES   |
| 40 | a    |          | 405.42                              | 0.68901                | YES | YES   |
| 41 | a    |          | 406.10                              | 0.31961                | YES | YES   |
| 42 | a    |          | 408.31                              | 0.37545                | YES | YES   |
| 43 | a    |          | 411.72                              | 0.61020                | YES | YES   |
| 44 | a    |          | 458.42                              | 10.47858               | YES | YES   |
| 45 | a    |          | 460.76                              | 8.75900                | YES | YES   |

|    |   |        |          |     |     |
|----|---|--------|----------|-----|-----|
| 46 | a | 473.58 | 6.38361  | YES | YES |
| 47 | a | 496.65 | 26.77595 | YES | YES |
| 48 | a | 535.21 | 11.13578 | YES | YES |
| 49 | a | 565.15 | 3.51503  | YES | YES |
| 50 | a | 569.66 | 0.96611  | YES | YES |



**[PhS(PPh3)]+**

bp86-d3 energy (au): -1665.2026239570

Zero point energy (au): 0.3585327

Entropy (kJ mol<sup>-1</sup>): 0.68915

Chemical potential (kJ mol<sup>-1</sup>): 798.64

XYZ coordinates:

46

|   |          |          |          |
|---|----------|----------|----------|
| P | 0.24249  | 0.58302  | 0.04101  |
| S | 2.11264  | -0.42410 | 0.16243  |
| C | 1.50583  | -2.11679 | 0.04701  |
| C | 1.22490  | -2.68302 | -1.21358 |
| H | 1.39010  | -2.10122 | -2.13349 |
| C | 0.72291  | -3.99294 | -1.27840 |
| H | 0.49793  | -4.44173 | -2.25925 |
| C | 0.51879  | -4.73189 | -0.09807 |
| H | 0.13120  | -5.76180 | -0.15599 |
| C | 0.81817  | -4.16487 | 1.15338  |
| H | 0.66501  | -4.74575 | 2.07698  |
| C | 1.30851  | -2.85144 | 1.23351  |
| H | 1.52671  | -2.39156 | 2.20977  |
| C | -0.95440 | -0.15515 | 1.17873  |
| C | -1.53758 | -1.40400 | 0.85268  |
| H | -1.30436 | -1.90340 | -0.10163 |
| C | -2.42187 | -2.00842 | 1.75729  |
| H | -2.87598 | -2.97957 | 1.50425  |
| C | -2.72391 | -1.37961 | 2.97839  |
| H | -3.42121 | -1.85846 | 3.68472  |
| C | -2.14369 | -0.13926 | 3.30010  |
| H | -2.38693 | 0.35566  | 4.25383  |
| C | -1.25610 | 0.47795  | 2.40590  |
| H | -0.81225 | 1.45387  | 2.65948  |
| C | 0.62370  | 2.29484  | 0.48823  |
| C | 0.07330  | 3.35186  | -0.27105 |
| H | -0.55751 | 3.14192  | -1.14968 |
| C | 0.34308  | 4.67817  | 0.10052  |
| H | -0.08144 | 5.50569  | -0.48983 |
| C | 1.15523  | 4.94890  | 1.21604  |
| H | 1.36618  | 5.99236  | 1.50053  |
| C | 1.70620  | 3.89414  | 1.96702  |
| H | 2.34790  | 4.10846  | 2.83644  |
| C | 1.44506  | 2.56324  | 1.60916  |
| H | 1.88490  | 1.73895  | 2.19413  |
| C | -0.40671 | 0.50873  | -1.65012 |
| C | -1.80239 | 0.49383  | -1.87312 |
| H | -2.50709 | 0.46083  | -1.02704 |
| C | -2.28935 | 0.52500  | -3.18989 |
| H | -3.37642 | 0.50915  | -3.36854 |
| C | -1.39480 | 0.57309  | -4.27351 |
| H | -1.78297 | 0.59364  | -5.30463 |
| C | -0.00567 | 0.59555  | -4.04744 |
| H | 0.69369  | 0.63494  | -4.89776 |
| C | 0.49431  | 0.56406  | -2.73769 |

H 1.58171 0.57657 -2.55743

Vibrational Spectrum (first 50 lines):

| #  | mode | symmetry | wave number | IR intensity | selection rules |
|----|------|----------|-------------|--------------|-----------------|
| #  |      | cm**(-1) | km/mol      | IR           | RAMAN           |
| 1  |      | 0.00     | 0.00000     | -            | -               |
| 2  |      | 0.00     | 0.00000     | -            | -               |
| 3  |      | 0.00     | 0.00000     | -            | -               |
| 4  |      | 0.00     | 0.00000     | -            | -               |
| 5  |      | 0.00     | 0.00000     | -            | -               |
| 6  |      | 0.00     | 0.00000     | -            | -               |
| 7  | a    | 22.19    | 0.06566     | YES          | YES             |
| 8  | a    | 31.12    | 0.01335     | YES          | YES             |
| 9  | a    | 42.45    | 0.16126     | YES          | YES             |
| 10 | a    | 46.58    | 0.06843     | YES          | YES             |
| 11 | a    | 49.72    | 0.08357     | YES          | YES             |
| 12 | a    | 58.00    | 0.14987     | YES          | YES             |
| 13 | a    | 64.53    | 0.08094     | YES          | YES             |
| 14 | a    | 73.09    | 0.20524     | YES          | YES             |
| 15 | a    | 88.15    | 0.12172     | YES          | YES             |
| 16 | a    | 103.88   | 0.49614     | YES          | YES             |
| 17 | a    | 117.83   | 0.70494     | YES          | YES             |
| 18 | a    | 187.81   | 1.61225     | YES          | YES             |
| 19 | a    | 201.85   | 1.44981     | YES          | YES             |
| 20 | a    | 213.01   | 1.79037     | YES          | YES             |
| 21 | a    | 220.34   | 0.05476     | YES          | YES             |
| 22 | a    | 241.87   | 0.71209     | YES          | YES             |
| 23 | a    | 257.67   | 0.40197     | YES          | YES             |
| 24 | a    | 268.20   | 0.61230     | YES          | YES             |
| 25 | a    | 286.20   | 1.78473     | YES          | YES             |
| 26 | a    | 317.69   | 2.81672     | YES          | YES             |
| 27 | a    | 393.06   | 0.18354     | YES          | YES             |
| 28 | a    | 393.96   | 0.02564     | YES          | YES             |
| 29 | a    | 400.27   | 0.94402     | YES          | YES             |
| 30 | a    | 403.66   | 0.03557     | YES          | YES             |
| 31 | a    | 405.99   | 2.48077     | YES          | YES             |
| 32 | a    | 437.51   | 6.65760     | YES          | YES             |
| 33 | a    | 440.35   | 4.39988     | YES          | YES             |
| 34 | a    | 450.42   | 6.83502     | YES          | YES             |
| 35 | a    | 481.13   | 14.01029    | YES          | YES             |
| 36 | a    | 497.26   | 55.81321    | YES          | YES             |
| 37 | a    | 514.10   | 82.39456    | YES          | YES             |
| 38 | a    | 547.59   | 60.70290    | YES          | YES             |
| 39 | a    | 604.09   | 0.01115     | YES          | YES             |
| 40 | a    | 605.10   | 0.52506     | YES          | YES             |
| 41 | a    | 605.62   | 0.23716     | YES          | YES             |
| 42 | a    | 606.72   | 0.46902     | YES          | YES             |
| 43 | a    | 679.52   | 7.46182     | YES          | YES             |
| 44 | a    | 688.21   | 1.40409     | YES          | YES             |
| 45 | a    | 691.49   | 11.23322    | YES          | YES             |
| 46 | a    | 692.63   | 53.92074    | YES          | YES             |
| 47 | a    | 694.15   | 26.98044    | YES          | YES             |
| 48 | a    | 697.69   | 12.64124    | YES          | YES             |
| 49 | a    | 714.20   | 27.58473    | YES          | YES             |
| 50 | a    | 715.17   | 32.94511    | YES          | YES             |

**[PhS(PPh3).PPh3]+**

bp86-d3 energy (au): -2701.0038358300

Zero point energy (au): 0.6254154

Entropy (kJ mol<sup>-1</sup>): 1.09049

Chemical potential (kJ mol<sup>-1</sup>): 1428.62

XYZ coordinates:

80

|   |          |          |          |
|---|----------|----------|----------|
| C | -4.71849 | 0.61946  | 3.77926  |
| H | -5.76888 | 0.76673  | 4.07883  |
| C | 2.87683  | 2.35776  | 3.63580  |
| H | 3.96901  | 2.33819  | 3.48980  |
| S | -0.39058 | 0.02653  | -0.12731 |
| P | -0.30678 | 0.04571  | 2.47048  |
| C | 0.88345  | 3.42084  | 4.54438  |
| H | 0.41106  | 4.23454  | 5.11846  |
| C | -4.17859 | 1.37037  | 2.71971  |
| H | -4.80358 | 2.10539  | 2.18689  |
| C | -2.03571 | 0.24095  | 3.01726  |
| C | 2.08803  | 1.33606  | 3.08830  |
| H | 2.56659  | 0.52246  | 2.51842  |
| C | 1.11616  | -4.11292 | 3.96338  |
| H | 1.44661  | -5.10913 | 4.29959  |
| C | 0.68430  | 1.34705  | 3.27715  |
| C | 3.47116  | 1.38493  | -0.22577 |
| H | 3.98608  | 2.34755  | -0.37563 |
| C | -2.84307 | 1.17816  | 2.33205  |
| H | -2.42231 | 1.75855  | 1.49332  |
| C | 0.27600  | -1.56476 | 3.10465  |
| C | 0.26924  | -3.99237 | 2.84591  |
| H | -0.06555 | -4.89300 | 2.30575  |
| C | 0.08490  | 2.39792  | 4.00627  |
| H | -1.00608 | 2.41325  | 4.16145  |
| C | 2.27708  | 3.40362  | 4.36141  |
| H | 2.89927  | 4.20703  | 4.78818  |
| C | -2.58150 | -0.51355 | 4.07910  |
| H | -1.95812 | -1.25020 | 4.61181  |
| C | 1.12162  | -1.68931 | 4.22793  |
| H | 1.45208  | -0.79214 | 4.77568  |
| C | -0.14523 | -2.72427 | 2.41264  |
| H | -0.79620 | -2.62743 | 1.52730  |
| C | 2.14958  | -1.07223 | 0.16470  |
| H | 1.62611  | -2.03020 | 0.30423  |
| C | -3.92097 | -0.32199 | 4.45451  |
| H | -4.34482 | -0.91100 | 5.28411  |
| C | 1.53967  | -2.96251 | 4.65095  |
| H | 2.19852  | -3.05502 | 5.52974  |
| C | 3.55115  | -1.00954 | 0.22132  |
| H | 4.12883  | -1.92803 | 0.41289  |
| C | 2.06753  | 1.33679  | -0.26036 |
| H | 1.48187  | 2.25276  | -0.43047 |
| C | 4.21306  | 0.21535  | 0.01926  |
| H | 5.31369  | 0.25924  | 0.05599  |

|   |          |          |          |
|---|----------|----------|----------|
| C | 1.40954  | 0.10458  | -0.07182 |
| C | -4.73945 | -1.05397 | -3.53973 |
| H | -5.78404 | -1.30185 | -3.78879 |
| C | 3.02686  | -2.06111 | -3.57965 |
| H | 4.11454  | -1.89440 | -3.52238 |
| P | -0.35657 | -0.03185 | -2.46434 |
| C | 1.13155  | -3.46153 | -4.19834 |
| H | 0.73187  | -4.39144 | -4.63401 |
| C | -4.08203 | -1.74505 | -2.50593 |
| H | -4.60925 | -2.53237 | -1.94352 |
| C | -2.07649 | -0.41870 | -2.90530 |
| C | 2.15193  | -1.07761 | -3.09747 |
| H | 2.55789  | -0.14929 | -2.66325 |
| C | 0.61640  | 4.14656  | -4.20553 |
| H | 0.83580  | 5.14734  | -4.61149 |
| C | 0.75266  | -1.28358 | -3.17331 |
| C | -2.75352 | -1.42865 | -2.18206 |
| H | -2.24160 | -1.96506 | -1.36614 |
| C | 0.06410  | 1.59296  | -3.16712 |
| C | -0.12767 | 4.01791  | -3.01788 |
| H | -0.49234 | 4.91578  | -2.49309 |
| C | 0.24459  | -2.48170 | -3.72384 |
| H | -0.84283 | -2.64619 | -3.79267 |
| C | 2.52019  | -3.25418 | -4.12704 |
| H | 3.21221  | -4.02508 | -4.50302 |
| C | -2.73862 | 0.27706  | -3.94083 |
| H | -2.21529 | 1.06940  | -4.50006 |
| C | 0.80518  | 1.72180  | -4.36231 |
| H | 1.16558  | 0.82680  | -4.89426 |
| C | -0.40251 | 2.74588  | -2.49480 |
| H | -0.97341 | 2.64229  | -1.55707 |
| C | -4.06884 | -0.04459 | -4.25367 |
| H | -4.58521 | 0.49767  | -5.06201 |
| C | 1.07992  | 3.00059  | -4.87489 |
| H | 1.65871  | 3.10008  | -5.80733 |

Vibrational Spectrum (first 50 lines):

| #  | mode | symmetry | wave number | IR intensity | selection rules |
|----|------|----------|-------------|--------------|-----------------|
| #  |      | cm**(-1) | km/mol      | IR           | RAMAN           |
| 1  |      | 0.00     | 0.00000     | -            | -               |
| 2  |      | 0.00     | 0.00000     | -            | -               |
| 3  |      | 0.00     | 0.00000     | -            | -               |
| 4  |      | 0.00     | 0.00000     | -            | -               |
| 5  |      | 0.00     | 0.00000     | -            | -               |
| 6  |      | 0.00     | 0.00000     | -            | -               |
| 7  | a    | 11.71    | 0.21045     | YES          | YES             |
| 8  | a    | 13.00    | 8.66956     | YES          | YES             |
| 9  | a    | 18.15    | 10.35528    | YES          | YES             |
| 10 | a    | 26.75    | 7.74266     | YES          | YES             |
| 11 | a    | 28.31    | 0.50355     | YES          | YES             |
| 12 | a    | 30.86    | 3.64463     | YES          | YES             |
| 13 | a    | 32.00    | 27.08949    | YES          | YES             |
| 14 | a    | 38.23    | 0.04784     | YES          | YES             |
| 15 | a    | 42.79    | 16.49858    | YES          | YES             |
| 16 | a    | 45.86    | 0.07016     | YES          | YES             |
| 17 | a    | 49.15    | 2.90867     | YES          | YES             |

|    |   |        |          |     |     |
|----|---|--------|----------|-----|-----|
| 18 | a | 50.33  | 8.30642  | YES | YES |
| 19 | a | 54.21  | 2.58702  | YES | YES |
| 20 | a | 57.78  | 1.47180  | YES | YES |
| 21 | a | 60.03  | 0.03597  | YES | YES |
| 22 | a | 62.58  | 55.30686 | YES | YES |
| 23 | a | 74.04  | 1.37743  | YES | YES |
| 24 | a | 78.47  | 37.44591 | YES | YES |
| 25 | a | 80.16  | 18.80348 | YES | YES |
| 26 | a | 93.84  | 49.82913 | YES | YES |
| 27 | a | 97.58  | 0.08996  | YES | YES |
| 28 | a | 120.17 | 2.73324  | YES | YES |
| 29 | a | 134.49 | 50.58788 | YES | YES |
| 30 | a | 143.80 | 0.89577  | YES | YES |
| 31 | a | 182.23 | 1.97841  | YES | YES |
| 32 | a | 186.73 | 1.00007  | YES | YES |
| 33 | a | 193.15 | 1.48712  | YES | YES |
| 34 | a | 198.34 | 2.43543  | YES | YES |
| 35 | a | 204.22 | 2.60378  | YES | YES |
| 36 | a | 210.18 | 3.77843  | YES | YES |
| 37 | a | 235.00 | 54.05797 | YES | YES |
| 38 | a | 238.66 | 1.17082  | YES | YES |
| 39 | a | 239.32 | 0.21173  | YES | YES |
| 40 | a | 253.48 | 1.38052  | YES | YES |
| 41 | a | 256.29 | 4.42552  | YES | YES |
| 42 | a | 265.40 | 0.81542  | YES | YES |
| 43 | a | 266.35 | 0.53460  | YES | YES |
| 44 | a | 300.66 | 7.42217  | YES | YES |
| 45 | a | 391.76 | 1.04254  | YES | YES |
| 46 | a | 393.17 | 0.30215  | YES | YES |
| 47 | a | 394.67 | 0.39932  | YES | YES |
| 48 | a | 394.99 | 0.98549  | YES | YES |
| 49 | a | 395.35 | 0.28036  | YES | YES |
| 50 | a | 398.41 | 5.24020  | YES | YES |

**[PhS(PtBu3).PPh3]+**

bp86-d3 energy (au): -2479.7007241250

Zero point energy (au): 0.7168914

Entropy (kJ mol<sup>-1</sup>): 1.06541

Chemical potential (kJ mol<sup>-1</sup>): 1681.15

XYZ coordinates:

86

|   |          |          |          |
|---|----------|----------|----------|
| P | -1.97819 | 0.20015  | 0.50655  |
| S | 0.93595  | -0.01080 | 0.51307  |
| C | 0.58300  | -1.76621 | 0.27169  |
| C | 0.27543  | -2.29030 | -0.99915 |
| H | 0.31135  | -1.65401 | -1.89470 |
| C | -0.13704 | -3.62883 | -1.11598 |
| H | -0.38471 | -4.03002 | -2.11158 |
| C | -0.25818 | -4.43793 | 0.02569  |
| H | -0.58636 | -5.48528 | -0.07189 |
| C | 0.01938  | -3.90218 | 1.29735  |
| H | -0.09906 | -4.52299 | 2.19994  |
| C | 0.43211  | -2.56734 | 1.42391  |
| H | 0.60901  | -2.13214 | 2.42006  |
| C | -3.46699 | -0.64525 | 1.17481  |
| C | -3.36623 | -2.03878 | 1.39660  |
| H | -2.42172 | -2.56474 | 1.17248  |
| C | -4.46433 | -2.75474 | 1.89982  |
| H | -4.38172 | -3.84188 | 2.06282  |
| C | -5.66055 | -2.08303 | 2.20840  |
| H | -6.51931 | -2.64292 | 2.61335  |
| C | -5.75794 | -0.69467 | 2.00708  |
| H | -6.69374 | -0.16582 | 2.25184  |
| C | -4.66816 | 0.02516  | 1.48962  |
| H | -4.75348 | 1.11249  | 1.33003  |
| C | -2.26124 | 1.99961  | 0.74897  |
| C | -3.01734 | 2.80311  | -0.13395 |
| H | -3.48029 | 2.35258  | -1.02731 |
| C | -3.17701 | 4.17508  | 0.12176  |
| H | -3.76954 | 4.79484  | -0.57116 |
| C | -2.58962 | 4.75669  | 1.26010  |
| H | -2.71843 | 5.83348  | 1.45753  |
| C | -1.84057 | 3.96306  | 2.14657  |
| H | -1.38302 | 4.41423  | 3.04231  |
| C | -1.67303 | 2.59196  | 1.88962  |
| H | -1.08561 | 1.96802  | 2.58505  |
| C | -2.08073 | -0.04231 | -1.31693 |
| C | -2.75572 | -1.14234 | -1.88974 |
| H | -3.37629 | -1.79859 | -1.25864 |
| C | -2.63832 | -1.41256 | -3.26390 |
| H | -3.17536 | -2.27297 | -3.69597 |
| C | -1.85098 | -0.58885 | -4.08682 |
| H | -1.76478 | -0.80060 | -5.16503 |
| C | -1.19081 | 0.52104  | -3.52810 |
| H | -0.58588 | 1.18505  | -4.16778 |
| C | -1.29960 | 0.78923  | -2.15479 |

|   |          |          |          |
|---|----------|----------|----------|
| H | -0.77583 | 1.66049  | -1.72737 |
| P | 3.05601  | 0.32890  | 0.06126  |
| C | 3.47077  | -0.07097 | -1.78940 |
| C | 4.73810  | 0.67370  | -2.26707 |
| H | 4.94675  | 0.35171  | -3.31246 |
| C | 2.27494  | 0.32494  | -2.68770 |
| H | 2.42682  | -0.13723 | -3.68846 |
| H | 2.19076  | 1.41547  | -2.84520 |
| H | 1.30271  | -0.03169 | -2.29746 |
| C | 3.05702  | 2.24793  | 0.38461  |
| C | 4.49984  | 2.77383  | 0.55641  |
| H | 4.45473  | 3.88486  | 0.60876  |
| H | 5.16585  | 2.51419  | -0.29048 |
| H | 4.97083  | 2.42607  | 1.49791  |
| H | 2.53414  | 2.06825  | 2.56121  |
| H | 1.13760  | 2.43786  | 1.48937  |
| H | 2.36163  | 3.69088  | 1.83427  |
| C | 2.38405  | 2.97508  | -0.80344 |
| H | 1.37051  | 2.57681  | -1.02124 |
| H | 2.99334  | 2.95242  | -1.72831 |
| H | 2.26390  | 4.04446  | -0.51990 |
| C | 4.22086  | -0.60775 | 1.29278  |
| C | 3.99188  | -0.04120 | 2.71124  |
| H | 4.55458  | -0.67781 | 3.43012  |
| H | 2.91996  | -0.07925 | 3.00095  |
| H | 4.36676  | 0.99436  | 2.83502  |
| C | 5.70647  | -0.46393 | 0.89407  |
| H | 6.04066  | 0.58768  | 0.79642  |
| H | 5.94454  | -1.00210 | -0.04615 |
| H | 6.32227  | -0.93027 | 1.69616  |
| C | 3.85089  | -2.10875 | 1.34404  |
| H | 3.95557  | -2.63442 | 0.37849  |
| H | 2.82134  | -2.27256 | 1.71263  |
| H | 4.54514  | -2.60009 | 2.06252  |
| H | 4.60461  | 1.77417  | -2.29151 |
| H | 5.63850  | 0.43873  | -1.66575 |
| C | 3.69279  | -1.59508 | -1.93162 |
| H | 3.80311  | -1.82532 | -3.01473 |
| H | 4.62207  | -1.94098 | -1.43582 |
| H | 2.83456  | -2.18872 | -1.55216 |
| C | 2.22433  | 2.60249  | 1.64486  |

Vibrational Spectrum (first 50 lines):

| #  | mode | symmetry | wave number | IR intensity | selection rules |
|----|------|----------|-------------|--------------|-----------------|
| #  |      | cm**(-1) | km/mol      | IR           | RAMAN           |
| 1  |      | 0.00     | 0.00000     | -            | -               |
| 2  |      | 0.00     | 0.00000     | -            | -               |
| 3  |      | 0.00     | 0.00000     | -            | -               |
| 4  |      | 0.00     | 0.00000     | -            | -               |
| 5  |      | 0.00     | 0.00000     | -            | -               |
| 6  |      | 0.00     | 0.00000     | -            | -               |
| 7  | a    | 7.52     | 0.03061     | YES          | YES             |
| 8  | a    | 21.20    | 0.39450     | YES          | YES             |
| 9  | a    | 24.11    | 0.03215     | YES          | YES             |
| 10 | a    | 30.37    | 1.72877     | YES          | YES             |
| 11 | a    | 42.70    | 0.11738     | YES          | YES             |

|    |   |        |          |     |     |
|----|---|--------|----------|-----|-----|
| 12 | a | 43.88  | 1.57672  | YES | YES |
| 13 | a | 50.20  | 0.22534  | YES | YES |
| 14 | a | 53.02  | 0.42411  | YES | YES |
| 15 | a | 54.07  | 1.07991  | YES | YES |
| 16 | a | 62.89  | 0.06616  | YES | YES |
| 17 | a | 66.17  | 1.16532  | YES | YES |
| 18 | a | 72.16  | 1.14437  | YES | YES |
| 19 | a | 83.68  | 0.75470  | YES | YES |
| 20 | a | 89.12  | 1.14240  | YES | YES |
| 21 | a | 95.74  | 9.75236  | YES | YES |
| 22 | a | 107.92 | 1.16322  | YES | YES |
| 23 | a | 111.45 | 0.64719  | YES | YES |
| 24 | a | 128.88 | 0.17124  | YES | YES |
| 25 | a | 131.83 | 0.94460  | YES | YES |
| 26 | a | 140.41 | 2.44510  | YES | YES |
| 27 | a | 143.82 | 0.54087  | YES | YES |
| 28 | a | 169.87 | 11.07762 | YES | YES |
| 29 | a | 178.33 | 13.45314 | YES | YES |
| 30 | a | 184.91 | 0.19633  | YES | YES |
| 31 | a | 192.02 | 2.72208  | YES | YES |
| 32 | a | 193.25 | 2.31891  | YES | YES |
| 33 | a | 205.63 | 2.33740  | YES | YES |
| 34 | a | 209.02 | 0.24246  | YES | YES |
| 35 | a | 211.91 | 0.88728  | YES | YES |
| 36 | a | 217.98 | 0.35361  | YES | YES |
| 37 | a | 234.17 | 0.36871  | YES | YES |
| 38 | a | 237.46 | 4.20043  | YES | YES |
| 39 | a | 239.57 | 1.32203  | YES | YES |
| 40 | a | 245.49 | 1.31435  | YES | YES |
| 41 | a | 247.02 | 1.08931  | YES | YES |
| 42 | a | 256.06 | 2.34671  | YES | YES |
| 43 | a | 259.48 | 5.83795  | YES | YES |
| 44 | a | 267.31 | 0.45389  | YES | YES |
| 45 | a | 269.67 | 16.26427 | YES | YES |
| 46 | a | 282.70 | 0.11862  | YES | YES |
| 47 | a | 284.38 | 17.24354 | YES | YES |
| 48 | a | 289.56 | 5.09931  | YES | YES |
| 49 | a | 294.82 | 16.16556 | YES | YES |
| 50 | a | 307.80 | 2.15273  | YES | YES |



**[PhS(PPh3).PtBu3]+\_try4**

bp86-d3 energy (au): -2479.6999708390

Zero point energy (au): 0.7167281

Entropy (kJ mol<sup>-1</sup>): 1.06330

Chemical potential (kJ mol<sup>-1</sup>): 1681.27

XYZ coordinates:

86

|   |          |          |          |
|---|----------|----------|----------|
| P | -1.92174 | 0.38667  | 0.02564  |
| S | 0.39147  | 0.17414  | -0.03847 |
| C | 0.25894  | -1.61861 | -0.09212 |
| C | -0.01373 | -2.26362 | -1.31576 |
| H | -0.11739 | -1.66970 | -2.23702 |
| C | -0.15106 | -3.66132 | -1.34827 |
| H | -0.36617 | -4.16581 | -2.30405 |
| C | -0.00115 | -4.41376 | -0.16895 |
| H | -0.09910 | -5.51092 | -0.20006 |
| C | 0.27209  | -3.76644 | 1.04912  |
| H | 0.38137  | -4.35250 | 1.97580  |
| C | 0.39141  | -2.36765 | 1.09372  |
| H | 0.57616  | -1.85168 | 2.04819  |
| C | -2.77086 | -0.62570 | 1.27093  |
| C | -2.84904 | -2.02530 | 1.06720  |
| H | -2.44939 | -2.47904 | 0.14552  |
| C | -3.43971 | -2.83902 | 2.04385  |
| H | -3.50091 | -3.92668 | 1.87882  |
| C | -3.94407 | -2.27180 | 3.22851  |
| H | -4.40505 | -2.91578 | 3.99488  |
| C | -3.86312 | -0.88331 | 3.43378  |
| H | -4.26500 | -0.43578 | 4.35711  |
| C | -3.27876 | -0.05671 | 2.46061  |
| H | -3.22916 | 1.03183  | 2.62393  |
| C | -2.11060 | 2.14928  | 0.42856  |
| C | -2.97749 | 2.98358  | -0.30990 |
| H | -3.57478 | 2.56889  | -1.13807 |
| C | -3.07380 | 4.34673  | 0.01351  |
| H | -3.75185 | 4.99643  | -0.56301 |
| C | -2.30998 | 4.88048  | 1.06647  |
| H | -2.38805 | 5.95138  | 1.31460  |
| C | -1.44544 | 4.05056  | 1.80299  |
| H | -0.84581 | 4.46814  | 2.62793  |
| C | -1.33889 | 2.68765  | 1.48607  |
| H | -0.65816 | 2.04013  | 2.06308  |
| C | -2.67464 | 0.08071  | -1.60166 |
| C | -3.94654 | -0.51774 | -1.73836 |
| H | -4.51539 | -0.82727 | -0.84700 |
| C | -4.48792 | -0.71472 | -3.01959 |
| H | -5.48030 | -1.18210 | -3.12464 |
| C | -3.77134 | -0.31409 | -4.16072 |
| H | -4.20079 | -0.47110 | -5.16342 |
| C | -2.50622 | 0.28748  | -4.02461 |
| H | -1.94455 | 0.60316  | -4.91865 |
| C | -1.95356 | 0.48179  | -2.75032 |
| H | -0.95685 | 0.94143  | -2.64201 |

|   |         |          |          |
|---|---------|----------|----------|
| P | 3.05716 | 0.20138  | -0.03277 |
| C | 3.47713 | 1.34259  | -1.54946 |
| C | 4.80349 | 2.11959  | -1.40695 |
| H | 5.00037 | 2.67346  | -2.35409 |
| C | 2.31967 | 2.35125  | -1.77314 |
| H | 2.56414 | 2.96420  | -2.67032 |
| H | 2.16635 | 3.05502  | -0.93406 |
| H | 1.35695 | 1.83381  | -1.96922 |
| C | 3.35177 | 1.16859  | 1.62436  |
| C | 4.83606 | 1.30030  | 2.02784  |
| H | 4.90435 | 1.92055  | 2.95104  |
| H | 5.44837 | 1.79805  | 1.24897  |
| H | 5.30144 | 0.32128  | 2.26236  |
| H | 2.92800 | -0.57497 | 2.96197  |
| H | 1.48180 | 0.39256  | 2.51209  |
| H | 2.67836 | 1.03487  | 3.69121  |
| C | 2.73751 | 2.58374  | 1.50564  |
| H | 1.67338 | 2.55815  | 1.18521  |
| H | 3.30268 | 3.24344  | 0.81768  |
| H | 2.76805 | 3.06291  | 2.51081  |
| C | 4.17290 | -1.39695 | -0.07427 |
| C | 4.09687 | -2.11128 | 1.29457  |
| H | 4.61670 | -3.09189 | 1.20286  |
| H | 3.04888 | -2.32405 | 1.59340  |
| H | 4.60316 | -1.55419 | 2.10806  |
| C | 5.65207 | -1.11381 | -0.41376 |
| H | 6.12523 | -0.39515 | 0.28536  |
| H | 5.78649 | -0.73584 | -1.44767 |
| H | 6.22156 | -2.06905 | -0.34382 |
| C | 3.57966 | -2.38578 | -1.10844 |
| H | 3.58380 | -2.00420 | -2.14619 |
| H | 2.54177 | -2.67681 | -0.85066 |
| H | 4.19890 | -3.31154 | -1.09919 |
| H | 4.76199 | 2.87613  | -0.59596 |
| H | 5.67402 | 1.46004  | -1.22238 |
| C | 3.52547 | 0.46501  | -2.82171 |
| H | 3.59520 | 1.13378  | -3.70970 |
| H | 4.40770 | -0.20569 | -2.85593 |
| H | 2.60387 | -0.14695 | -2.93786 |
| C | 2.56549 | 0.44850  | 2.75064  |

Vibrational Spectrum (first 50 lines):

| #  | mode | symmetry | wave number | IR intensity | selection rules |
|----|------|----------|-------------|--------------|-----------------|
| #  |      | cm**(-1) | km/mol      | IR           | RAMAN           |
| 1  |      | 0.00     | 0.00000     | -            | -               |
| 2  |      | 0.00     | 0.00000     | -            | -               |
| 3  |      | 0.00     | 0.00000     | -            | -               |
| 4  |      | 0.00     | 0.00000     | -            | -               |
| 5  |      | 0.00     | 0.00000     | -            | -               |
| 6  |      | 0.00     | 0.00000     | -            | -               |
| 7  | a    | 12.46    | 0.06388     | YES          | YES             |
| 8  | a    | 17.28    | 1.18768     | YES          | YES             |
| 9  | a    | 23.37    | 0.34490     | YES          | YES             |
| 10 | a    | 26.09    | 0.86876     | YES          | YES             |
| 11 | a    | 42.39    | 0.55633     | YES          | YES             |
| 12 | a    | 46.64    | 0.29436     | YES          | YES             |

|    |   |        |           |     |     |
|----|---|--------|-----------|-----|-----|
| 13 | a | 50.82  | 0.28956   | YES | YES |
| 14 | a | 55.16  | 1.87158   | YES | YES |
| 15 | a | 60.29  | 2.27829   | YES | YES |
| 16 | a | 61.42  | 8.39357   | YES | YES |
| 17 | a | 67.48  | 44.40369  | YES | YES |
| 18 | a | 73.64  | 45.90538  | YES | YES |
| 19 | a | 78.41  | 0.05598   | YES | YES |
| 20 | a | 86.76  | 0.01968   | YES | YES |
| 21 | a | 98.48  | 4.17279   | YES | YES |
| 22 | a | 100.11 | 2.10148   | YES | YES |
| 23 | a | 107.40 | 4.52644   | YES | YES |
| 24 | a | 118.27 | 2.07838   | YES | YES |
| 25 | a | 127.09 | 0.10820   | YES | YES |
| 26 | a | 137.36 | 106.81882 | YES | YES |
| 27 | a | 153.04 | 0.84784   | YES | YES |
| 28 | a | 180.23 | 1.64232   | YES | YES |
| 29 | a | 188.12 | 1.25069   | YES | YES |
| 30 | a | 188.37 | 0.00704   | YES | YES |
| 31 | a | 190.02 | 0.21871   | YES | YES |
| 32 | a | 200.09 | 1.60093   | YES | YES |
| 33 | a | 204.37 | 1.95647   | YES | YES |
| 34 | a | 208.82 | 2.49752   | YES | YES |
| 35 | a | 209.96 | 1.11566   | YES | YES |
| 36 | a | 211.64 | 1.93011   | YES | YES |
| 37 | a | 238.29 | 7.41593   | YES | YES |
| 38 | a | 240.98 | 43.03673  | YES | YES |
| 39 | a | 246.07 | 0.24999   | YES | YES |
| 40 | a | 248.32 | 4.95860   | YES | YES |
| 41 | a | 251.61 | 3.30961   | YES | YES |
| 42 | a | 255.76 | 0.59761   | YES | YES |
| 43 | a | 258.21 | 5.26432   | YES | YES |
| 44 | a | 262.55 | 0.13550   | YES | YES |
| 45 | a | 266.30 | 0.64852   | YES | YES |
| 46 | a | 276.94 | 1.23438   | YES | YES |
| 47 | a | 287.57 | 0.04717   | YES | YES |
| 48 | a | 288.64 | 0.13686   | YES | YES |
| 49 | a | 299.62 | 3.00009   | YES | YES |
| 50 | a | 302.76 | 6.22915   | YES | YES |

**[PhS(PtBu3)]+**

bp86-d3 energy (au): -1443.8975144210

Zero point energy (au): 0.4494198

Entropy (kJ mol<sup>-1</sup>): 0.67887

Chemical potential (kJ mol<sup>-1</sup>): 1046.08

XYZ coordinates:

52

|   |          |          |          |
|---|----------|----------|----------|
| P | -0.98935 | -0.00649 | 0.01267  |
| C | 2.20779  | -0.67149 | 0.09442  |
| C | 4.28847  | -0.01147 | 1.17207  |
| H | 4.88057  | 0.13814  | 2.08914  |
| C | 4.85105  | 0.26105  | -0.08741 |
| H | 5.88639  | 0.63064  | -0.16022 |
| C | 4.09975  | 0.04134  | -1.25534 |
| H | 4.54682  | 0.22682  | -2.24518 |
| C | 2.78181  | -0.43761 | -1.17129 |
| H | 2.21680  | -0.64380 | -2.09194 |
| C | -0.81322 | 1.46401  | 1.25984  |
| C | -1.85258 | 2.56557  | 0.94845  |
| H | -1.78271 | 3.33073  | 1.75442  |
| C | 0.60873  | 2.07157  | 1.20222  |
| H | 0.62869  | 2.92626  | 1.91509  |
| H | 0.89452  | 2.46814  | 0.21229  |
| H | 1.38614  | 1.35501  | 1.52501  |
| C | -1.03883 | 0.58876  | -1.83302 |
| C | -2.44374 | 1.12439  | -2.19627 |
| H | -2.39245 | 1.52911  | -3.23187 |
| H | -2.78256 | 1.95105  | -1.54032 |
| H | -3.21922 | 0.33188  | -2.20022 |
| H | -1.42714 | -1.38963 | -2.79222 |
| H | 0.30521  | -1.03764 | -2.52970 |
| H | -0.61058 | -0.17341 | -3.80951 |
| C | 0.00102  | 1.71472  | -2.03802 |
| H | 1.02394  | 1.41826  | -1.72805 |
| H | -0.27586 | 2.65414  | -1.51986 |
| H | 0.03837  | 1.94674  | -3.12541 |
| C | -2.49318 | -1.17142 | 0.44408  |
| C | -2.75610 | -2.13923 | -0.73353 |
| H | -3.53481 | -2.86219 | -0.40431 |
| H | -1.85639 | -2.72968 | -1.00748 |
| H | -3.15201 | -1.63169 | -1.63532 |
| C | -3.75950 | -0.32650 | 0.71282  |
| H | -4.02190 | 0.35463  | -0.12082 |
| H | -3.68959 | 0.26266  | 1.64969  |
| H | -4.61254 | -1.03007 | 0.83974  |
| C | -2.18425 | -2.04364 | 1.68816  |
| H | -1.93937 | -1.46488 | 2.59688  |
| H | -1.36849 | -2.77200 | 1.50417  |
| H | -3.10299 | -2.63120 | 1.91024  |
| S | 0.58427  | -1.43134 | 0.28855  |
| C | 2.96856  | -0.47969 | 1.26867  |
| H | 2.52831  | -0.70343 | 2.25357  |

|   |          |          |          |
|---|----------|----------|----------|
| H | -1.64448 | 3.08861  | -0.00684 |
| H | -2.89819 | 2.20121  | 0.93561  |
| C | -1.01995 | 0.92671  | 2.69310  |
| H | -0.78370 | 1.75095  | 3.40239  |
| H | -2.06380 | 0.61560  | 2.89782  |
| H | -0.33373 | 0.08409  | 2.92268  |
| C | -0.67373 | -0.58096 | -2.77627 |

Vibrational Spectrum (first 50 lines):

| #  | mode | symmetry | wave number | IR intensity | selection rules |
|----|------|----------|-------------|--------------|-----------------|
| #  |      | cm**(-1) | km/mol      | IR           | RAMAN           |
| 1  |      | 0.00     | 0.00000     | -            | -               |
| 2  |      | 0.00     | 0.00000     | -            | -               |
| 3  |      | 0.00     | 0.00000     | -            | -               |
| 4  |      | 0.00     | 0.00000     | -            | -               |
| 5  |      | 0.00     | 0.00000     | -            | -               |
| 6  |      | 0.00     | 0.00000     | -            | -               |
| 7  | a    | 29.35    | 0.14896     | YES          | YES             |
| 8  | a    | 59.29    | 0.06529     | YES          | YES             |
| 9  | a    | 66.58    | 0.09494     | YES          | YES             |
| 10 | a    | 86.09    | 0.46722     | YES          | YES             |
| 11 | a    | 97.60    | 0.14851     | YES          | YES             |
| 12 | a    | 125.10   | 0.26660     | YES          | YES             |
| 13 | a    | 129.61   | 0.16945     | YES          | YES             |
| 14 | a    | 132.58   | 0.73201     | YES          | YES             |
| 15 | a    | 160.32   | 0.05950     | YES          | YES             |
| 16 | a    | 176.64   | 0.52081     | YES          | YES             |
| 17 | a    | 183.33   | 0.25060     | YES          | YES             |
| 18 | a    | 191.65   | 0.10477     | YES          | YES             |
| 19 | a    | 205.50   | 1.15075     | YES          | YES             |
| 20 | a    | 212.82   | 1.20909     | YES          | YES             |
| 21 | a    | 213.82   | 0.73879     | YES          | YES             |
| 22 | a    | 241.21   | 0.48217     | YES          | YES             |
| 23 | a    | 242.11   | 1.12368     | YES          | YES             |
| 24 | a    | 254.22   | 0.36426     | YES          | YES             |
| 25 | a    | 257.98   | 0.41016     | YES          | YES             |
| 26 | a    | 261.86   | 0.03358     | YES          | YES             |
| 27 | a    | 270.98   | 0.39870     | YES          | YES             |
| 28 | a    | 279.83   | 0.50126     | YES          | YES             |
| 29 | a    | 288.93   | 0.21399     | YES          | YES             |
| 30 | a    | 292.22   | 0.48217     | YES          | YES             |
| 31 | a    | 308.47   | 0.10564     | YES          | YES             |
| 32 | a    | 323.17   | 0.17866     | YES          | YES             |
| 33 | a    | 335.20   | 0.23545     | YES          | YES             |
| 34 | a    | 344.15   | 0.51056     | YES          | YES             |
| 35 | a    | 348.55   | 0.66404     | YES          | YES             |
| 36 | a    | 369.77   | 1.13841     | YES          | YES             |
| 37 | a    | 377.75   | 0.36378     | YES          | YES             |
| 38 | a    | 387.05   | 0.60985     | YES          | YES             |
| 39 | a    | 399.00   | 0.74688     | YES          | YES             |
| 40 | a    | 405.34   | 1.81245     | YES          | YES             |
| 41 | a    | 408.79   | 0.96764     | YES          | YES             |
| 42 | a    | 414.86   | 0.06703     | YES          | YES             |
| 43 | a    | 420.19   | 2.65538     | YES          | YES             |
| 44 | a    | 459.91   | 11.59598    | YES          | YES             |
| 45 | a    | 463.59   | 8.94133     | YES          | YES             |

|    |   |        |          |     |     |
|----|---|--------|----------|-----|-----|
| 46 | a | 488.39 | 8.37350  | YES | YES |
| 47 | a | 513.54 | 9.11553  | YES | YES |
| 48 | a | 547.11 | 16.48070 | YES | YES |
| 49 | a | 572.49 | 4.84325  | YES | YES |
| 50 | a | 579.18 | 8.80090  | YES | YES |

## TS [PhS(PPh3)2]<sup>+</sup>

bp86-d3 energy (au): -2701.0038127390

Zero point energy (au): 0.6253348

Entropy (kJ mol<sup>-1</sup>): 1.06380

Chemical potential (kJ mol<sup>-1</sup>): 1434.06

XYZ coordinates:

80

|   |          |          |          |
|---|----------|----------|----------|
| C | -4.71984 | 0.66605  | 3.43775  |
| H | -5.76862 | 0.82214  | 3.73887  |
| C | 2.87827  | 2.35166  | 3.33284  |
| H | 3.97027  | 2.33563  | 3.18494  |
| S | -0.38729 | 0.04069  | -0.38712 |
| P | -0.31247 | 0.06130  | 2.13890  |
| C | 0.88578  | 3.39529  | 4.26736  |
| H | 0.41379  | 4.19643  | 4.85945  |
| C | -4.17503 | 1.41272  | 2.37759  |
| H | -4.79503 | 2.15246  | 1.84569  |
| C | -2.04226 | 0.26574  | 2.67192  |
| C | 2.08990  | 1.34042  | 2.76563  |
| H | 2.56856  | 0.53844  | 2.17985  |
| C | 1.05914  | -4.13228 | 3.57199  |
| H | 1.37619  | -5.13702 | 3.89440  |
| C | 0.68618  | 1.34881  | 2.95653  |
| C | 3.47646  | 1.38419  | -0.56582 |
| H | 3.99261  | 2.34454  | -0.72840 |
| C | -2.84106 | 1.21151  | 1.98890  |
| H | -2.41574 | 1.79082  | 1.15199  |
| C | 0.25255  | -1.56363 | 2.74857  |
| C | 0.17982  | -3.98862 | 2.48258  |
| H | -0.19362 | -4.87927 | 1.95115  |
| C | 0.08682  | 2.38417  | 3.70863  |
| H | -1.00394 | 2.39636  | 3.86579  |
| C | 2.27914  | 3.38213  | 4.08116  |
| H | 2.90178  | 4.17690  | 4.52300  |
| C | -2.59249 | -0.48520 | 3.73435  |
| H | -1.97422 | -1.22708 | 4.26555  |
| C | 1.12948  | -1.71059 | 3.84425  |
| H | 1.49667  | -0.82341 | 4.38469  |
| C | -0.21886 | -2.71048 | 2.06659  |
| H | -0.89694 | -2.59575 | 1.20386  |
| C | 2.15264  | -1.06763 | -0.14481 |
| H | 1.62822  | -2.02366 | 0.00427  |
| C | -3.92964 | -0.28204 | 4.11233  |
| H | -4.35708 | -0.86710 | 4.94295  |
| C | 1.53061  | -2.99458 | 4.24945  |
| H | 2.21371  | -3.10510 | 5.10662  |
| C | 3.55607  | -1.01007 | -0.11576 |
| H | 4.13420  | -1.93078 | 0.06429  |
| C | 2.07151  | 1.34070  | -0.57508 |
| H | 1.48516  | 2.25712  | -0.74124 |
| C | 4.21878  | 0.21255  | -0.33052 |
| H | 5.32050  | 0.25259  | -0.31275 |

|   |          |          |          |
|---|----------|----------|----------|
| C | 1.41253  | 0.11158  | -0.36694 |
| C | -4.71132 | -1.10387 | -3.89196 |
| H | -5.75149 | -1.36281 | -4.14611 |
| C | 3.05683  | -2.04451 | -3.89956 |
| H | 4.14312  | -1.86814 | -3.84026 |
| P | -0.34366 | -0.03896 | -2.78992 |
| C | 1.17430  | -3.46048 | -4.52204 |
| H | 0.78316  | -4.39397 | -4.95823 |
| C | -4.05810 | -1.77498 | -2.84308 |
| H | -4.58435 | -2.55777 | -2.27348 |
| C | -2.05841 | -0.44096 | -3.24559 |
| C | 2.17218  | -1.06955 | -3.41802 |
| H | 2.56976  | -0.13898 | -2.98084 |
| C | 0.60287  | 4.13694  | -4.55697 |
| H | 0.81485  | 5.13726  | -4.96815 |
| C | 0.77439  | -1.28530 | -3.49821 |
| C | -2.73518 | -1.44379 | -2.51299 |
| H | -2.22655 | -1.96369 | -1.68420 |
| C | 0.06588  | 1.58341  | -3.50768 |
| C | -0.15669 | 4.00765  | -3.37930 |
| H | -0.54047 | 4.90469  | -2.86718 |
| C | 0.27800  | -2.48778 | -4.04990 |
| H | -0.80800 | -2.66137 | -4.12069 |
| C | 2.56126  | -3.24146 | -4.44896 |
| H | 3.26025  | -4.00620 | -4.82432 |
| C | -2.71691 | 0.23516  | -4.29540 |
| H | -2.19441 | 1.02348  | -4.86105 |
| C | 0.82344  | 1.71350  | -4.69204 |
| H | 1.20212  | 0.81910  | -5.21170 |
| C | -0.42223 | 2.73594  | -2.85045 |
| H | -1.00493 | 2.63232  | -1.92001 |
| C | -4.04180 | -0.10007 | -4.61418 |
| H | -4.55459 | 0.42716  | -5.43441 |
| C | 1.09081  | 2.99176  | -5.20991 |
| H | 1.68216  | 3.09155  | -6.13439 |

Vibrational Spectrum (first 50 lines):

| #  | mode | symmetry | wave number | IR intensity | selection rules |
|----|------|----------|-------------|--------------|-----------------|
| #  |      | cm**(-1) | km/mol      | IR           | RAMAN           |
| 1  | a    | -36.09   | 0.00000     | YES          | YES             |
| 2  |      | 0.00     | 0.00000     | -            | -               |
| 3  |      | 0.00     | 0.00000     | -            | -               |
| 4  |      | 0.00     | 0.00000     | -            | -               |
| 5  |      | 0.00     | 0.00000     | -            | -               |
| 6  |      | 0.00     | 0.00000     | -            | -               |
| 7  |      | 0.00     | 0.00000     | -            | -               |
| 8  | a    | 12.36    | 0.00200     | YES          | YES             |
| 9  | a    | 15.94    | 1.76672     | YES          | YES             |
| 10 | a    | 22.22    | 1.09731     | YES          | YES             |
| 11 | a    | 27.12    | 4.14742     | YES          | YES             |
| 12 | a    | 29.41    | 0.00875     | YES          | YES             |
| 13 | a    | 31.18    | 0.39858     | YES          | YES             |
| 14 | a    | 38.04    | 2.64403     | YES          | YES             |
| 15 | a    | 41.20    | 0.09706     | YES          | YES             |
| 16 | a    | 45.22    | 4.12322     | YES          | YES             |
| 17 | a    | 47.80    | 0.11624     | YES          | YES             |



|    |   |        |          |     |     |
|----|---|--------|----------|-----|-----|
| 18 | a | 50.04  | 0.50135  | YES | YES |
| 19 | a | 54.16  | 4.90790  | YES | YES |
| 20 | a | 56.41  | 24.78094 | YES | YES |
| 21 | a | 57.51  | 0.03609  | YES | YES |
| 22 | a | 60.05  | 1.15056  | YES | YES |
| 23 | a | 75.63  | 22.48699 | YES | YES |
| 24 | a | 76.77  | 5.51923  | YES | YES |
| 25 | a | 82.03  | 2.40786  | YES | YES |
| 26 | a | 93.08  | 22.78435 | YES | YES |
| 27 | a | 100.57 | 0.17172  | YES | YES |
| 28 | a | 118.45 | 2.36660  | YES | YES |
| 29 | a | 126.79 | 5.34730  | YES | YES |
| 30 | a | 145.35 | 1.11709  | YES | YES |
| 31 | a | 184.17 | 2.02096  | YES | YES |
| 32 | a | 185.60 | 1.14848  | YES | YES |
| 33 | a | 196.12 | 0.96321  | YES | YES |
| 34 | a | 197.92 | 3.92722  | YES | YES |
| 35 | a | 203.98 | 1.68985  | YES | YES |
| 36 | a | 210.23 | 3.91590  | YES | YES |
| 37 | a | 236.49 | 42.40653 | YES | YES |
| 38 | a | 238.97 | 0.67031  | YES | YES |
| 39 | a | 239.41 | 1.31485  | YES | YES |
| 40 | a | 254.23 | 0.15677  | YES | YES |
| 41 | a | 256.08 | 6.44924  | YES | YES |
| 42 | a | 265.55 | 0.70424  | YES | YES |
| 43 | a | 266.71 | 0.40693  | YES | YES |
| 44 | a | 302.05 | 6.54072  | YES | YES |
| 45 | a | 392.19 | 1.49954  | YES | YES |
| 46 | a | 393.20 | 0.48400  | YES | YES |
| 47 | a | 394.13 | 0.99258  | YES | YES |
| 48 | a | 394.35 | 0.56191  | YES | YES |
| 49 | a | 395.50 | 1.09565  | YES | YES |
| 50 | a | 396.72 | 1.31307  | YES | YES |

## TS [PhS(PPh3)(PtBu3)]+

bp86-d3 energy (au): -2479.6997558530

Zero point energy (au): 0.7166162

Entropy (kJ mol<sup>-1</sup>): 1.06836

Chemical potential (kJ mol<sup>-1</sup>): 1679.79

XYZ coordinates:

86

|   |          |          |          |
|---|----------|----------|----------|
| P | -2.15560 | 0.20525  | 0.03142  |
| S | 0.24253  | 0.02625  | -0.01367 |
| C | 0.11215  | -1.76841 | 0.00575  |
| C | -0.19969 | -2.45316 | -1.18751 |
| H | -0.31631 | -1.88963 | -2.12623 |
| C | -0.36584 | -3.84763 | -1.16624 |
| H | -0.61352 | -4.38130 | -2.09804 |
| C | -0.20770 | -4.56015 | 0.03676  |
| H | -0.33209 | -5.65511 | 0.04904  |
| C | 0.10269  | -3.87436 | 1.22426  |
| H | 0.21451  | -4.42795 | 2.17060  |
| C | 0.25216  | -2.47739 | 1.21495  |
| H | 0.46248  | -1.93304 | 2.14761  |
| C | -3.06478 | -0.75408 | 1.27895  |
| C | -3.07749 | -2.16527 | 1.15770  |
| H | -2.58729 | -2.65656 | 0.30138  |
| C | -3.72243 | -2.94285 | 2.12966  |
| H | -3.73371 | -4.03998 | 2.02747  |
| C | -4.34481 | -2.32707 | 3.23116  |
| H | -4.84750 | -2.94216 | 3.99514  |
| C | -4.32731 | -0.92687 | 3.35615  |
| H | -4.82072 | -0.44179 | 4.21402  |
| C | -3.69089 | -0.13698 | 2.38499  |
| H | -3.69156 | 0.96041  | 2.48389  |
| C | -2.31680 | 1.98145  | 0.39240  |
| C | -3.06577 | 2.85047  | -0.42924 |
| H | -3.61875 | 2.45376  | -1.29577 |
| C | -3.10085 | 4.22477  | -0.14057 |
| H | -3.68667 | 4.90147  | -0.78331 |
| C | -2.39518 | 4.73589  | 0.96275  |
| H | -2.42622 | 5.81504  | 1.18422  |
| C | -1.64923 | 3.87136  | 1.78489  |
| H | -1.09680 | 4.26994  | 2.65138  |
| C | -1.60169 | 2.49837  | 1.49991  |
| H | -1.01177 | 1.82305  | 2.14197  |
| C | -2.88408 | -0.11774 | -1.60488 |
| C | -4.13805 | -0.74708 | -1.76365 |
| H | -4.71698 | -1.06295 | -0.88110 |
| C | -4.64916 | -0.96558 | -3.05394 |
| H | -5.62892 | -1.45488 | -3.17550 |
| C | -3.92011 | -0.55634 | -4.18424 |
| H | -4.32709 | -0.72814 | -5.19403 |
| C | -2.67100 | 0.07300  | -4.02754 |
| H | -2.09883 | 0.39542  | -4.91263 |
| C | -2.14832 | 0.28657  | -2.74372 |

|   |          |          |          |
|---|----------|----------|----------|
| H | -1.16381 | 0.76819  | -2.61961 |
| P | 2.77779  | 0.21091  | -0.02648 |
| C | 3.06342  | 1.43790  | -1.50396 |
| C | 4.36540  | 2.25922  | -1.38204 |
| H | 4.49483  | 2.86261  | -2.31009 |
| C | 1.86235  | 2.41255  | -1.62645 |
| H | 2.05009  | 3.07730  | -2.49983 |
| H | 1.71944  | 3.06858  | -0.74807 |
| H | 0.91042  | 1.87345  | -1.81398 |
| C | 3.07901  | 1.11640  | 1.66220  |
| C | 4.57289  | 1.28673  | 2.01395  |
| H | 4.65233  | 1.87679  | 2.95551  |
| H | 5.13627  | 1.83547  | 1.23236  |
| H | 5.08265  | 0.31878  | 2.19613  |
| H | 2.73907  | -0.71234 | 2.90701  |
| H | 1.26665  | 0.27184  | 2.59700  |
| H | 2.52209  | 0.84798  | 3.74783  |
| C | 2.41042  | 2.51122  | 1.62822  |
| H | 1.33931  | 2.46072  | 1.33654  |
| H | 2.93282  | 3.22531  | 0.96098  |
| H | 2.45248  | 2.93983  | 2.65555  |
| C | 3.95005  | -1.33686 | -0.18482 |
| C | 3.95274  | -2.11309 | 1.15215  |
| H | 4.51507  | -3.06220 | 0.99925  |
| H | 2.92614  | -2.39072 | 1.47199  |
| H | 4.45863  | -1.56932 | 1.97463  |
| C | 5.40024  | -0.96658 | -0.56278 |
| H | 5.86651  | -0.25628 | 0.14947  |
| H | 5.47742  | -0.54133 | -1.58405 |
| H | 6.01442  | -1.89615 | -0.55309 |
| C | 3.36463  | -2.30187 | -1.24467 |
| H | 3.32210  | -1.87528 | -2.26401 |
| H | 2.34904  | -2.64847 | -0.96857 |
| H | 4.02194  | -3.19940 | -1.29435 |
| H | 4.33261  | 2.97571  | -0.53536 |
| H | 5.26920  | 1.62895  | -1.26946 |
| C | 3.08548  | 0.61815  | -2.81439 |
| H | 3.08341  | 1.32695  | -3.67346 |
| H | 3.99207  | -0.01084 | -2.91854 |
| H | 2.18468  | -0.02698 | -2.91302 |
| C | 2.36100  | 0.31921  | 2.78067  |

Vibrational Spectrum (first 50 lines):

| #  | mode | symmetry | wave number | IR intensity | selection rules |
|----|------|----------|-------------|--------------|-----------------|
| #  |      |          | cm**(-1)    | km/mol       | IR RAMAN        |
| 1  |      |          | 0.00        | 0.00000      | - -             |
| 2  |      |          | 0.00        | 0.00000      | - -             |
| 3  |      |          | 0.00        | 0.00000      | - -             |
| 4  |      |          | 0.00        | 0.00000      | - -             |
| 5  |      |          | 0.00        | 0.00000      | - -             |
| 6  |      |          | 0.00        | 0.00000      | - -             |
| 7  | a    |          | 14.67       | 9.54740      | YES YES         |
| 8  | a    |          | 16.81       | 26.97966     | YES YES         |
| 9  | a    |          | 21.13       | 0.02649      | YES YES         |
| 10 | a    |          | 26.72       | 9.52686      | YES YES         |
| 11 | a    |          | 38.26       | 64.02273     | YES YES         |

|    |   |        |          |     |     |
|----|---|--------|----------|-----|-----|
| 12 | a | 45.73  | 73.37596 | YES | YES |
| 13 | a | 48.83  | 5.94534  | YES | YES |
| 14 | a | 51.25  | 4.81896  | YES | YES |
| 15 | a | 56.86  | 3.00080  | YES | YES |
| 16 | a | 62.38  | 1.03149  | YES | YES |
| 17 | a | 63.80  | 0.29190  | YES | YES |
| 18 | a | 72.47  | 11.45846 | YES | YES |
| 19 | a | 78.22  | 0.02974  | YES | YES |
| 20 | a | 86.10  | 0.03122  | YES | YES |
| 21 | a | 91.41  | 1.90672  | YES | YES |
| 22 | a | 99.95  | 1.57095  | YES | YES |
| 23 | a | 105.96 | 11.44110 | YES | YES |
| 24 | a | 117.79 | 23.02596 | YES | YES |
| 25 | a | 121.58 | 7.18783  | YES | YES |
| 26 | a | 127.49 | 1.49972  | YES | YES |
| 27 | a | 155.15 | 1.54051  | YES | YES |
| 28 | a | 174.07 | 2.33930  | YES | YES |
| 29 | a | 182.74 | 0.13061  | YES | YES |
| 30 | a | 187.28 | 1.10693  | YES | YES |
| 31 | a | 195.05 | 0.61581  | YES | YES |
| 32 | a | 199.83 | 0.77557  | YES | YES |
| 33 | a | 201.35 | 2.20342  | YES | YES |
| 34 | a | 203.94 | 2.29637  | YES | YES |
| 35 | a | 209.96 | 0.99306  | YES | YES |
| 36 | a | 211.48 | 1.36014  | YES | YES |
| 37 | a | 236.17 | 12.96442 | YES | YES |
| 38 | a | 237.55 | 5.49890  | YES | YES |
| 39 | a | 238.63 | 24.41792 | YES | YES |
| 40 | a | 244.83 | 9.57443  | YES | YES |
| 41 | a | 255.07 | 0.39832  | YES | YES |
| 42 | a | 258.36 | 0.94732  | YES | YES |
| 43 | a | 259.42 | 1.41498  | YES | YES |
| 44 | a | 261.89 | 0.26289  | YES | YES |
| 45 | a | 263.97 | 0.55048  | YES | YES |
| 46 | a | 274.79 | 0.57682  | YES | YES |
| 47 | a | 282.95 | 0.11438  | YES | YES |
| 48 | a | 289.71 | 1.10105  | YES | YES |
| 49 | a | 300.02 | 11.08640 | YES | YES |
| 50 | a | 304.85 | 0.86105  | YES | YES |

## TS [PhSe(PPh3)2]<sup>+</sup>

bp86-d3 energy (au): -4704.4492843920

Zero point energy (au): 0.6246426

Entropy (kJ mol<sup>-1</sup>): 1.09860

Chemical potential (kJ mol<sup>-1</sup>): 1425.03

XYZ coordinates:

80

|    |          |          |          |
|----|----------|----------|----------|
| C  | -4.70687 | 0.75361  | 4.02354  |
| H  | -5.73957 | 0.93881  | 4.36100  |
| C  | 2.95059  | 2.20243  | 3.55897  |
| H  | 4.03908  | 2.11070  | 3.41389  |
| Se | -0.52496 | 0.00056  | -0.00095 |
| P  | -0.37199 | 0.00670  | 2.56250  |
| C  | 1.02492  | 3.43428  | 4.39790  |
| H  | 0.60166  | 4.30836  | 4.91886  |
| C  | -4.16693 | 1.51087  | 2.96854  |
| H  | -4.77341 | 2.28928  | 2.47780  |
| C  | -2.07110 | 0.27778  | 3.16375  |
| C  | 2.10382  | 1.19202  | 3.08137  |
| H  | 2.53465  | 0.31607  | 2.56957  |
| C  | 0.97687  | -4.14194 | 4.13687  |
| H  | 1.28748  | -5.13500 | 4.50020  |
| C  | 0.70413  | 1.29762  | 3.26849  |
| C  | 3.51735  | 1.20019  | -0.24018 |
| H  | 4.06322  | 2.13922  | -0.42609 |
| C  | -2.85454 | 1.27164  | 2.53177  |
| H  | -2.43523 | 1.86099  | 1.69851  |
| C  | 0.19133  | -1.60484 | 3.20668  |
| C  | 0.15693  | -4.03465 | 2.99837  |
| H  | -0.17714 | -4.94189 | 2.46918  |
| C  | 0.16756  | 2.42576  | 3.92799  |
| H  | -0.91952 | 2.51386  | 4.08525  |
| C  | 2.41435  | 3.32595  | 4.21438  |
| H  | 3.08325  | 4.11856  | 4.58715  |
| C  | -2.61612 | -0.48336 | 4.22095  |
| H  | -2.01216 | -1.26398 | 4.71143  |
| C  | 1.00845  | -1.71433 | 4.35277  |
| H  | 1.33877  | -0.81021 | 4.88890  |
| C  | -0.23246 | -2.77107 | 2.52950  |
| H  | -0.86242 | -2.68497 | 1.62813  |
| C  | 2.11503  | -1.19743 | 0.23417  |
| H  | 1.56534  | -2.13541 | 0.40594  |
| C  | -3.93272 | -0.24224 | 4.64539  |
| H  | -4.35686 | -0.83668 | 5.47081  |
| C  | 1.39984  | -2.98338 | 4.81126  |
| H  | 2.03792  | -3.06594 | 5.70609  |
| C  | 3.52024  | -1.18785 | 0.24591  |
| H  | 4.06837  | -2.12536 | 0.43281  |
| C  | 2.11210  | 1.20587  | -0.23086 |
| H  | 1.56010  | 2.14233  | -0.40359 |
| C  | 4.22148  | 0.00713  | 0.00343  |
| H  | 5.32360  | 0.00865  | 0.00431  |
| C  | 1.41582  | 0.00323  | 0.00097  |

|   |          |          |          |
|---|----------|----------|----------|
| C | -4.69655 | -0.77024 | -4.03146 |
| H | -5.72804 | -0.95930 | -4.37048 |
| C | 2.96536  | -2.19224 | -3.55070 |
| H | 4.05329  | -2.09612 | -3.40422 |
| P | -0.36683 | -0.00688 | -2.56355 |
| C | 1.04555  | -3.43327 | -4.38949 |
| H | 0.62629  | -4.31017 | -4.90894 |
| C | -4.15558 | -1.52509 | -2.97525 |
| H | -4.76017 | -2.30519 | -2.48488 |
| C | -2.06382 | -0.28467 | -3.16778 |
| C | 2.11412  | -1.18388 | -3.07668 |
| H | 2.54090  | -0.30521 | -2.56609 |
| C | 0.97175  | 4.14355  | -4.14194 |
| H | 1.27982  | 5.13700  | -4.50636 |
| C | 0.71509  | -1.29519 | -3.26550 |
| C | -2.84467 | -1.28115 | -2.53668 |
| H | -2.42443 | -1.86886 | -1.70273 |
| C | 0.19251  | 1.60550  | -3.20910 |
| C | 0.15211  | 4.03543  | -3.00332 |
| H | -0.18399 | 4.94238  | -2.47492 |
| C | 0.18375  | -2.42681 | -3.92330 |
| H | -0.90274 | -2.51920 | -4.08224 |
| C | 2.43428  | -3.31934 | -4.20417 |
| H | 3.10669  | -4.11032 | -4.57405 |
| C | -2.60984 | 0.47395  | -4.22628 |
| H | -2.00784 | 1.25642  | -4.71625 |
| C | 1.00926  | 1.71582  | -4.35541 |
| H | 1.34169  | 0.81192  | -4.89066 |
| C | -0.23429 | 2.77138  | -2.53321 |
| H | -0.86430 | 2.68462  | -1.63192 |
| C | -3.92493 | 0.22798  | -4.65266 |
| H | -4.34983 | 0.82045  | -5.47910 |
| C | 1.39758  | 2.98535  | -4.81517 |
| H | 2.03556  | 3.06855  | -5.71001 |

Vibrational Spectrum (first 50 lines):

| #  | mode | symmetry | wave number | IR intensity | selection rules |
|----|------|----------|-------------|--------------|-----------------|
| #  |      | cm**(-1) | km/mol      | IR           | RAMAN           |
| 1  |      | 0.00     | 0.00000     | -            | -               |
| 2  |      | 0.00     | 0.00000     | -            | -               |
| 3  |      | 0.00     | 0.00000     | -            | -               |
| 4  |      | 0.00     | 0.00000     | -            | -               |
| 5  |      | 0.00     | 0.00000     | -            | -               |
| 6  |      | 0.00     | 0.00000     | -            | -               |
| 7  | a    | 9.80     | 0.00190     | YES          | YES             |
| 8  | a    | 11.77    | 0.12689     | YES          | YES             |
| 9  | a    | 19.52    | 0.00849     | YES          | YES             |
| 10 | a    | 27.24    | 0.04257     | YES          | YES             |
| 11 | a    | 28.86    | 0.00010     | YES          | YES             |
| 12 | a    | 30.48    | 0.03476     | YES          | YES             |
| 13 | a    | 38.03    | 0.01914     | YES          | YES             |
| 14 | a    | 40.48    | 0.08149     | YES          | YES             |
| 15 | a    | 41.54    | 2.53796     | YES          | YES             |
| 16 | a    | 46.29    | 0.04527     | YES          | YES             |
| 17 | a    | 47.97    | 3.01276     | YES          | YES             |
| 18 | a    | 50.16    | 2.72662     | YES          | YES             |

|    |   |        |          |     |     |
|----|---|--------|----------|-----|-----|
| 19 | a | 53.64  | 0.60586  | YES | YES |
| 20 | a | 58.22  | 0.02995  | YES | YES |
| 21 | a | 59.58  | 0.00625  | YES | YES |
| 22 | a | 64.76  | 16.70906 | YES | YES |
| 23 | a | 74.78  | 0.00699  | YES | YES |
| 24 | a | 80.22  | 0.01885  | YES | YES |
| 25 | a | 85.38  | 37.62862 | YES | YES |
| 26 | a | 95.13  | 0.01312  | YES | YES |
| 27 | a | 100.91 | 88.17640 | YES | YES |
| 28 | a | 104.83 | 0.08815  | YES | YES |
| 29 | a | 115.93 | 1.16746  | YES | YES |
| 30 | a | 125.08 | 0.02112  | YES | YES |
| 31 | a | 184.25 | 2.54960  | YES | YES |
| 32 | a | 185.06 | 0.48245  | YES | YES |
| 33 | a | 194.68 | 0.07694  | YES | YES |
| 34 | a | 195.81 | 4.83483  | YES | YES |
| 35 | a | 204.53 | 1.20545  | YES | YES |
| 36 | a | 205.96 | 3.29412  | YES | YES |
| 37 | a | 220.78 | 12.21506 | YES | YES |
| 38 | a | 238.08 | 7.44069  | YES | YES |
| 39 | a | 238.98 | 0.35554  | YES | YES |
| 40 | a | 239.98 | 0.04183  | YES | YES |
| 41 | a | 253.59 | 0.01048  | YES | YES |
| 42 | a | 254.25 | 1.68898  | YES | YES |
| 43 | a | 265.97 | 0.98640  | YES | YES |
| 44 | a | 266.73 | 0.14350  | YES | YES |
| 45 | a | 306.93 | 0.01774  | YES | YES |
| 46 | a | 393.36 | 0.04426  | YES | YES |
| 47 | a | 393.58 | 0.09574  | YES | YES |
| 48 | a | 394.33 | 1.03264  | YES | YES |
| 49 | a | 394.85 | 0.21426  | YES | YES |
| 50 | a | 395.98 | 0.37077  | YES | YES |

## TS [PhSe(PPh3)(PtBu3)]+

bp86-d3 energy (au): -4483.1449057450

Zero point energy (au): 0.7161509

Entropy (kJ mol<sup>-1</sup>): 1.07491

Chemical potential (kJ mol<sup>-1</sup>): 1677.11

XYZ coordinates:

86

|    |          |          |          |
|----|----------|----------|----------|
| P  | -2.05303 | 0.39302  | 0.03638  |
| Se | 0.53382  | 0.24348  | 0.04356  |
| C  | 0.27331  | -1.68561 | 0.00159  |
| C  | -0.10127 | -2.29777 | -1.21331 |
| H  | -0.20110 | -1.69575 | -2.12977 |
| C  | -0.37202 | -3.67619 | -1.24556 |
| H  | -0.67187 | -4.14802 | -2.19520 |
| C  | -0.26013 | -4.44719 | -0.07430 |
| H  | -0.46620 | -5.52927 | -0.10450 |
| C  | 0.10289  | -3.83246 | 1.13613  |
| H  | 0.17236  | -4.42674 | 2.06152  |
| C  | 0.35724  | -2.45038 | 1.18042  |
| H  | 0.60063  | -1.96962 | 2.13792  |
| C  | -2.96592 | -0.56707 | 1.28731  |
| C  | -2.94642 | -1.97999 | 1.19598  |
| H  | -2.44167 | -2.47776 | 0.35209  |
| C  | -3.58491 | -2.75273 | 2.17645  |
| H  | -3.56981 | -3.85170 | 2.09601  |
| C  | -4.23493 | -2.12957 | 3.25739  |
| H  | -4.73399 | -2.74004 | 4.02742  |
| C  | -4.25068 | -0.72711 | 3.35268  |
| H  | -4.76579 | -0.23543 | 4.19385  |
| C  | -3.61957 | 0.05688  | 2.37286  |
| H  | -3.64462 | 1.15581  | 2.44957  |
| C  | -2.37253 | 2.16620  | 0.32475  |
| C  | -3.27976 | 2.90206  | -0.46825 |
| H  | -3.83463 | 2.40424  | -1.27996 |
| C  | -3.47261 | 4.27099  | -0.22059 |
| H  | -4.18229 | 4.84245  | -0.84047 |
| C  | -2.76789 | 4.90970  | 0.81525  |
| H  | -2.92332 | 5.98408  | 1.00585  |
| C  | -1.86327 | 4.17944  | 1.60722  |
| H  | -1.31163 | 4.67881  | 2.42024  |
| C  | -1.65756 | 2.81288  | 1.36078  |
| H  | -0.94327 | 2.24263  | 1.97893  |
| C  | -2.73790 | -0.02152 | -1.60430 |
| C  | -3.95180 | -0.72288 | -1.76781 |
| H  | -4.53315 | -1.04008 | -0.88727 |
| C  | -4.42131 | -1.01460 | -3.05986 |
| H  | -5.37028 | -1.56132 | -3.18305 |
| C  | -3.69037 | -0.60671 | -4.18891 |
| H  | -4.06315 | -0.83772 | -5.19996 |
| C  | -2.48266 | 0.09802  | -4.02834 |
| H  | -1.90880 | 0.42103  | -4.91221 |
| C  | -2.00303 | 0.38619  | -2.74206 |



|   |          |          |          |
|---|----------|----------|----------|
| H | -1.04953 | 0.92704  | -2.61574 |
| P | 3.13101  | 0.28124  | 0.01290  |
| C | 3.45706  | 1.90462  | -1.00298 |
| C | 4.86343  | 2.49466  | -0.76161 |
| H | 5.00487  | 3.36333  | -1.44464 |
| C | 2.38564  | 2.97113  | -0.65170 |
| H | 2.60430  | 3.88524  | -1.24932 |
| H | 2.37882  | 3.27476  | 0.41057  |
| H | 1.36111  | 2.64375  | -0.93084 |
| C | 3.69446  | 0.52188  | 1.85319  |
| C | 5.22003  | 0.38426  | 2.04774  |
| H | 5.46418  | 0.61218  | 3.11055  |
| H | 5.80011  | 1.08879  | 1.41841  |
| H | 5.58275  | -0.64467 | 1.84763  |
| H | 3.14133  | -1.56676 | 2.44285  |
| H | 1.85954  | -0.33401 | 2.71861  |
| H | 3.30156  | -0.39561 | 3.78345  |
| C | 3.23857  | 1.90943  | 2.36084  |
| H | 2.14803  | 2.06809  | 2.21417  |
| H | 3.79442  | 2.74928  | 1.89796  |
| H | 3.43345  | 1.95733  | 3.45639  |
| C | 4.04083  | -1.23005 | -0.79731 |
| C | 3.99672  | -2.42450 | 0.18387  |
| H | 4.40393  | -3.31764 | -0.34151 |
| H | 2.95892  | -2.67118 | 0.49485  |
| H | 4.62190  | -2.27066 | 1.08609  |
| C | 5.50642  | -0.92633 | -1.17727 |
| H | 6.11959  | -0.58629 | -0.31890 |
| H | 5.58656  | -0.17201 | -1.98654 |
| H | 5.96875  | -1.86365 | -1.56346 |
| C | 3.26421  | -1.66820 | -2.06235 |
| H | 3.27332  | -0.91889 | -2.87507 |
| H | 2.21261  | -1.92716 | -1.82971 |
| H | 3.75002  | -2.58692 | -2.46218 |
| H | 4.99331  | 2.87394  | 0.27248  |
| H | 5.67697  | 1.77307  | -0.97274 |
| C | 3.28022  | 1.59797  | -2.50784 |
| H | 3.30134  | 2.56154  | -3.06449 |
| H | 4.09526  | 0.97019  | -2.92046 |
| H | 2.30297  | 1.11206  | -2.71975 |
| C | 2.95491  | -0.51579 | 2.73193  |

Vibrational Spectrum (first 50 lines):

| #  | mode | symmetry | wave number | IR intensity | selection rules |
|----|------|----------|-------------|--------------|-----------------|
| #  |      |          | cm**(-1)    | km/mol       | IR RAMAN        |
| 1  |      |          | 0.00        | 0.00000      | - -             |
| 2  |      |          | 0.00        | 0.00000      | - -             |
| 3  |      |          | 0.00        | 0.00000      | - -             |
| 4  |      |          | 0.00        | 0.00000      | - -             |
| 5  |      |          | 0.00        | 0.00000      | - -             |
| 6  |      |          | 0.00        | 0.00000      | - -             |
| 7  | a    |          | 12.28       | 0.20466      | YES YES         |
| 8  | a    |          | 15.94       | 0.02268      | YES YES         |
| 9  | a    |          | 22.13       | 0.04644      | YES YES         |
| 10 | a    |          | 24.01       | 0.05804      | YES YES         |
| 11 | a    |          | 39.85       | 1.81795      | YES YES         |

|    |   |        |          |     |     |
|----|---|--------|----------|-----|-----|
| 12 | a | 42.42  | 0.31488  | YES | YES |
| 13 | a | 48.92  | 0.16649  | YES | YES |
| 14 | a | 53.92  | 0.78329  | YES | YES |
| 15 | a | 56.22  | 0.33038  | YES | YES |
| 16 | a | 60.87  | 2.73518  | YES | YES |
| 17 | a | 63.69  | 13.36530 | YES | YES |
| 18 | a | 76.47  | 5.45993  | YES | YES |
| 19 | a | 81.16  | 34.45298 | YES | YES |
| 20 | a | 86.31  | 21.37884 | YES | YES |
| 21 | a | 99.96  | 13.21943 | YES | YES |
| 22 | a | 103.47 | 1.12509  | YES | YES |
| 23 | a | 104.50 | 0.77461  | YES | YES |
| 24 | a | 111.13 | 22.27491 | YES | YES |
| 25 | a | 122.59 | 0.74007  | YES | YES |
| 26 | a | 128.10 | 0.65648  | YES | YES |
| 27 | a | 134.08 | 0.60476  | YES | YES |
| 28 | a | 176.98 | 0.28441  | YES | YES |
| 29 | a | 186.06 | 1.08141  | YES | YES |
| 30 | a | 194.35 | 0.65652  | YES | YES |
| 31 | a | 196.82 | 1.54920  | YES | YES |
| 32 | a | 199.90 | 0.85684  | YES | YES |
| 33 | a | 200.82 | 0.81541  | YES | YES |
| 34 | a | 205.71 | 0.67167  | YES | YES |
| 35 | a | 210.79 | 1.16460  | YES | YES |
| 36 | a | 218.97 | 0.49229  | YES | YES |
| 37 | a | 224.62 | 15.90173 | YES | YES |
| 38 | a | 235.86 | 4.64958  | YES | YES |
| 39 | a | 238.41 | 0.53795  | YES | YES |
| 40 | a | 241.88 | 1.11099  | YES | YES |
| 41 | a | 248.70 | 0.42728  | YES | YES |
| 42 | a | 254.72 | 0.28870  | YES | YES |
| 43 | a | 256.04 | 0.93647  | YES | YES |
| 44 | a | 258.34 | 0.56370  | YES | YES |
| 45 | a | 264.78 | 0.43677  | YES | YES |
| 46 | a | 266.46 | 0.37999  | YES | YES |
| 47 | a | 278.06 | 0.94098  | YES | YES |
| 48 | a | 285.50 | 0.30362  | YES | YES |
| 49 | a | 288.26 | 0.36456  | YES | YES |
| 50 | a | 300.73 | 1.12528  | YES | YES |

## BP86-D3/def2-TZVPP level optimisations

**PPh<sub>3</sub>**

bp86-d3\_def2-tzvpp energy (au): -1036.6639706350

Zero point energy (au): 0.2658278

Entropy (kJ mol<sup>-1</sup>): 0.55878

Chemical potential (kJ mol<sup>-1</sup>): 576.65

XYZ coordinates:

34

|   |          |          |          |
|---|----------|----------|----------|
| P | 0.00345  | -1.25939 | -0.00475 |
| C | 1.16677  | -0.43197 | 1.16378  |
| C | -0.11502 | -0.98809 | -2.76943 |
| H | -0.74188 | -1.87940 | -2.70051 |
| C | 1.24566  | 0.70395  | -1.70462 |
| H | 1.67629  | 1.14774  | -0.80685 |
| C | 0.42819  | -0.43204 | -1.59793 |
| C | 3.39304  | -0.42647 | 2.14902  |
| H | 4.38104  | -0.87836 | 2.24273  |
| C | 1.50877  | 1.27203  | -2.95405 |
| H | 2.14809  | 2.15299  | -3.02220 |
| C | 0.85471  | 0.71785  | 1.90598  |
| H | -0.13186 | 1.17207  | 1.81125  |
| C | 0.95229  | 0.72023  | -4.11072 |
| H | 1.15833  | 1.16587  | -5.08415 |
| C | 2.44407  | -1.00186 | 1.30277  |
| H | 2.69389  | -1.90385 | 0.74045  |
| C | 1.80074  | 1.28547  | 2.76341  |
| H | 1.54394  | 2.17790  | 3.33545  |
| C | 3.07195  | 0.71838  | 2.88466  |
| H | 3.80870  | 1.16332  | 3.55392  |
| C | 0.13572  | -0.41090 | -4.01510 |
| H | -0.29875 | -0.85027 | -4.91363 |
| C | -2.13944 | 0.64473  | -0.28118 |
| H | -1.61495 | 1.04887  | -1.14710 |
| C | -1.59008 | -0.43577 | 0.42611  |
| C | -2.28636 | -0.94059 | 1.53879  |
| H | -1.87554 | -1.78866 | 2.09040  |
| C | -3.35357 | 1.20983  | 0.11983  |
| H | -3.76943 | 2.04778  | -0.44093 |
| C | -4.02924 | 0.71105  | 1.23606  |
| H | -4.97467 | 1.15510  | 1.54848  |
| C | -3.49000 | -0.36569 | 1.94760  |
| H | -4.01295 | -0.76428 | 2.81752  |

Vibrational Spectrum (first 50 lines):

| #  | mode | symmetry | wave number<br>cm**(-1) | IR intensity<br>km/mol | IR  | RAMAN | selection rules |
|----|------|----------|-------------------------|------------------------|-----|-------|-----------------|
| 1  |      |          | 0.00                    | 0.00000                | -   | -     |                 |
| 2  |      |          | 0.00                    | 0.00000                | -   | -     |                 |
| 3  |      |          | 0.00                    | 0.00000                | -   | -     |                 |
| 4  |      |          | 0.00                    | 0.00000                | -   | -     |                 |
| 5  |      |          | 0.00                    | 0.00000                | -   | -     |                 |
| 6  |      |          | 0.00                    | 0.00000                | -   | -     |                 |
| 7  | a    |          | 28.28                   | 0.32442                | YES | YES   |                 |
| 8  | a    |          | 32.03                   | 0.34528                | YES | YES   |                 |
| 9  | a    |          | 47.83                   | 0.01536                | YES | YES   |                 |
| 10 | a    |          | 52.20                   | 0.09672                | YES | YES   |                 |
| 11 | a    |          | 53.28                   | 0.05906                | YES | YES   |                 |
| 12 | a    |          | 64.24                   | 0.37231                | YES | YES   |                 |
| 13 | a    |          | 177.87                  | 0.25643                | YES | YES   |                 |
| 14 | a    |          | 193.97                  | 1.13167                | YES | YES   |                 |
| 15 | a    |          | 196.57                  | 1.14462                | YES | YES   |                 |
| 16 | a    |          | 240.72                  | 0.83264                | YES | YES   |                 |
| 17 | a    |          | 251.41                  | 0.40088                | YES | YES   |                 |
| 18 | a    |          | 253.59                  | 0.44026                | YES | YES   |                 |
| 19 | a    |          | 389.20                  | 1.28089                | YES | YES   |                 |
| 20 | a    |          | 389.92                  | 1.47820                | YES | YES   |                 |
| 21 | a    |          | 393.40                  | 0.13850                | YES | YES   |                 |
| 22 | a    |          | 397.27                  | 0.28675                | YES | YES   |                 |
| 23 | a    |          | 417.13                  | 5.17343                | YES | YES   |                 |
| 24 | a    |          | 419.75                  | 6.04148                | YES | YES   |                 |
| 25 | a    |          | 488.47                  | 24.64764               | YES | YES   |                 |
| 26 | a    |          | 491.68                  | 25.65993               | YES | YES   |                 |
| 27 | a    |          | 501.44                  | 16.30215               | YES | YES   |                 |
| 28 | a    |          | 611.93                  | 0.18146                | YES | YES   |                 |
| 29 | a    |          | 612.33                  | 0.20631                | YES | YES   |                 |
| 30 | a    |          | 612.68                  | 0.06433                | YES | YES   |                 |
| 31 | a    |          | 673.55                  | 1.17894                | YES | YES   |                 |
| 32 | a    |          | 686.83                  | 0.43275                | YES | YES   |                 |
| 33 | a    |          | 687.69                  | 0.45543                | YES | YES   |                 |
| 34 | a    |          | 692.91                  | 36.57445               | YES | YES   |                 |
| 35 | a    |          | 693.19                  | 35.13637               | YES | YES   |                 |
| 36 | a    |          | 694.15                  | 29.92496               | YES | YES   |                 |
| 37 | a    |          | 738.30                  | 27.96569               | YES | YES   |                 |
| 38 | a    |          | 738.96                  | 22.31890               | YES | YES   |                 |
| 39 | a    |          | 739.55                  | 25.84029               | YES | YES   |                 |
| 40 | a    |          | 835.91                  | 0.07200                | YES | YES   |                 |
| 41 | a    |          | 836.88                  | 0.10637                | YES | YES   |                 |
| 42 | a    |          | 839.83                  | 0.20341                | YES | YES   |                 |
| 43 | a    |          | 904.60                  | 1.07637                | YES | YES   |                 |
| 44 | a    |          | 905.46                  | 0.79626                | YES | YES   |                 |
| 45 | a    |          | 908.05                  | 0.41986                | YES | YES   |                 |
| 46 | a    |          | 956.40                  | 0.00653                | YES | YES   |                 |
| 47 | a    |          | 956.78                  | 0.11902                | YES | YES   |                 |
| 48 | a    |          | 958.62                  | 0.13514                | YES | YES   |                 |
| 49 | a    |          | 971.48                  | 0.01770                | YES | YES   |                 |
| 50 | a    |          | 971.92                  | 0.01536                | YES | YES   |                 |

**P(<sup>t</sup>Bu)<sub>3</sub>**

bp86-d3\_def2-tzvpp energy (au): -815.1643359689

Zero point energy (au): 0.3571682

Entropy (kJ mol<sup>-1</sup>): 0.54042

Chemical potential (kJ mol<sup>-1</sup>): 827.61

XYZ coordinates:

40

|   |          |          |          |
|---|----------|----------|----------|
| P | 0.70323  | 0.00039  | -0.00038 |
| C | -0.01696 | 1.69470  | -0.61119 |
| C | -1.49417 | 1.72726  | -1.03735 |
| H | -1.76984 | 2.75523  | -1.32687 |
| C | 0.86701  | 2.15083  | -1.79648 |
| H | 0.60176  | 3.18715  | -2.06177 |
| H | 0.73524  | 1.54251  | -2.69549 |
| H | 1.93197  | 2.13204  | -1.52753 |
| C | -0.01672 | -1.37605 | -1.16255 |
| C | -1.49291 | -1.76414 | -0.97555 |
| H | -1.76709 | -2.53073 | -1.71947 |
| H | -2.16953 | -0.91336 | -1.11487 |
| H | -1.68840 | -2.19344 | 0.01395  |
| H | 0.74288  | -3.10235 | 0.01193  |
| H | 1.93420  | -2.38392 | -1.08763 |
| H | 0.60365  | -3.37879 | -1.72780 |
| C | 0.19374  | -0.94934 | -2.62933 |
| H | 1.23051  | -0.63965 | -2.82030 |
| H | -0.47565 | -0.13898 | -2.93789 |
| H | -0.01920 | -1.81175 | -3.28097 |
| C | -0.01887 | -0.31784 | 1.77237  |
| C | 0.19144  | -1.80179 | 2.13677  |
| H | -0.02414 | -1.93540 | 3.20906  |
| H | 1.22901  | -2.11986 | 1.96625  |
| H | -0.47583 | -2.47523 | 1.58789  |
| C | -1.49553 | 0.03805  | 2.01433  |
| H | -2.17117 | -0.50636 | 1.34529  |
| H | -1.69120 | 1.11008  | 1.89490  |
| H | -1.76991 | -0.22571 | 3.04934  |
| C | 0.86759  | 0.47753  | 2.76033  |
| H | 0.74265  | 1.56109  | 2.68080  |
| H | 1.93136  | 0.24683  | 2.61215  |
| H | 0.59846  | 0.19340  | 3.79080  |
| H | -1.69078 | 1.08681  | -1.90498 |
| H | -2.16892 | 1.42019  | -0.23024 |
| C | 0.19651  | 2.75085  | 0.49213  |
| H | -0.01964 | 3.74694  | 0.07371  |
| H | -0.46951 | 2.61147  | 1.35092  |
| H | 1.23454  | 2.76196  | 0.85165  |
| C | 0.87030  | -2.62875 | -0.96567 |

Vibrational Spectrum (first 50 lines):

| #  | mode | symmetry | cm**(-1) | km/mol  | IR  | RAMAN |
|----|------|----------|----------|---------|-----|-------|
| 1  |      |          | 0.00     | 0.00000 | -   | -     |
| 2  |      |          | 0.00     | 0.00000 | -   | -     |
| 3  |      |          | 0.00     | 0.00000 | -   | -     |
| 4  |      |          | 0.00     | 0.00000 | -   | -     |
| 5  |      |          | 0.00     | 0.00000 | -   | -     |
| 6  |      |          | 0.00     | 0.00000 | -   | -     |
| 7  | a    |          | 92.53    | 0.01627 | YES | YES   |
| 8  | a    |          | 97.96    | 0.01382 | YES | YES   |
| 9  | a    |          | 128.99   | 0.00118 | YES | YES   |
| 10 | a    |          | 171.55   | 0.07846 | YES | YES   |
| 11 | a    |          | 182.35   | 0.03587 | YES | YES   |
| 12 | a    |          | 183.30   | 0.00634 | YES | YES   |
| 13 | a    |          | 199.81   | 0.03290 | YES | YES   |
| 14 | a    |          | 202.69   | 0.00348 | YES | YES   |
| 15 | a    |          | 208.41   | 0.03285 | YES | YES   |
| 16 | a    |          | 231.65   | 0.13097 | YES | YES   |
| 17 | a    |          | 241.25   | 0.04557 | YES | YES   |
| 18 | a    |          | 244.02   | 0.13850 | YES | YES   |
| 19 | a    |          | 256.63   | 0.25812 | YES | YES   |
| 20 | a    |          | 258.16   | 0.24053 | YES | YES   |
| 21 | a    |          | 265.85   | 0.00543 | YES | YES   |
| 22 | a    |          | 272.73   | 0.00504 | YES | YES   |
| 23 | a    |          | 279.26   | 0.01648 | YES | YES   |
| 24 | a    |          | 288.89   | 0.00145 | YES | YES   |
| 25 | a    |          | 320.12   | 0.06846 | YES | YES   |
| 26 | a    |          | 327.93   | 0.24446 | YES | YES   |
| 27 | a    |          | 336.30   | 0.23137 | YES | YES   |
| 28 | a    |          | 349.67   | 0.00729 | YES | YES   |
| 29 | a    |          | 363.41   | 0.29787 | YES | YES   |
| 30 | a    |          | 365.44   | 0.30351 | YES | YES   |
| 31 | a    |          | 397.32   | 0.44636 | YES | YES   |
| 32 | a    |          | 398.88   | 0.28725 | YES | YES   |
| 33 | a    |          | 401.92   | 0.17004 | YES | YES   |
| 34 | a    |          | 448.17   | 3.65293 | YES | YES   |
| 35 | a    |          | 450.77   | 3.71831 | YES | YES   |
| 36 | a    |          | 472.05   | 1.01593 | YES | YES   |
| 37 | a    |          | 529.53   | 0.31072 | YES | YES   |
| 38 | a    |          | 557.99   | 5.95101 | YES | YES   |
| 39 | a    |          | 559.33   | 6.03573 | YES | YES   |
| 40 | a    |          | 787.36   | 9.34079 | YES | YES   |
| 41 | a    |          | 788.58   | 7.51422 | YES | YES   |
| 42 | a    |          | 791.33   | 4.60246 | YES | YES   |
| 43 | a    |          | 903.91   | 0.85428 | YES | YES   |
| 44 | a    |          | 905.10   | 1.99040 | YES | YES   |
| 45 | a    |          | 906.86   | 1.49548 | YES | YES   |
| 46 | a    |          | 911.21   | 0.26771 | YES | YES   |
| 47 | a    |          | 913.69   | 1.02224 | YES | YES   |
| 48 | a    |          | 915.22   | 1.19177 | YES | YES   |
| 49 | a    |          | 922.15   | 0.08711 | YES | YES   |
| 50 | a    |          | 928.57   | 0.71637 | YES | YES   |

**[GaCl<sub>4</sub>]<sup>-</sup>**

bp86-d3\_def2-tzvpp energy (au): -3766.5388836840

Zero point energy (au): 0.0045852

Entropy (kJ mol<sup>-1</sup>): 0.36433

Chemical potential (kJ mol<sup>-1</sup>): -73.78

XYZ coordinates:

5

|    |          |          |          |
|----|----------|----------|----------|
| Ga | 0.00000  | 0.00000  | 0.00000  |
| Cl | -1.28247 | -1.28247 | -1.28247 |
| Cl | 1.28247  | 1.28247  | -1.28247 |
| Cl | 1.28247  | -1.28247 | 1.28247  |
| Cl | -1.28247 | 1.28247  | 1.28247  |

Vibrational Spectrum:

| #  | mode | symmetry             | wave number | IR intensity | selection rules |
|----|------|----------------------|-------------|--------------|-----------------|
| #  |      | cm <sup>**(-1)</sup> | km/mol      | IR           | RAMAN           |
| 1  |      | 0.00                 | 0.00000     | -            | -               |
| 2  |      | 0.00                 | 0.00000     | -            | -               |
| 3  |      | 0.00                 | 0.00000     | -            | -               |
| 4  |      | 0.00                 | 0.00000     | -            | -               |
| 5  |      | 0.00                 | 0.00000     | -            | -               |
| 6  |      | 0.00                 | 0.00000     | -            | -               |
| 7  | e    | 98.16                | 0.00000     | NO           | YES             |
| 8  | e    | 98.16                | 0.00000     | NO           | YES             |
| 9  | t2   | 140.22               | 8.85721     | YES          | YES             |
| 10 | t2   | 140.22               | 8.85721     | YES          | YES             |
| 11 | t2   | 140.22               | 8.85721     | YES          | YES             |
| 12 | a1   | 319.28               | 0.00000     | NO           | YES             |
| 13 | t2   | 358.82               | 91.28713    | YES          | YES             |
| 14 | t2   | 358.82               | 91.28713    | YES          | YES             |
| 15 | t2   | 358.82               | 91.28713    | YES          | YES             |

**[PhS]<sup>+</sup>**

bp86-d3\_def2-tzvpp energy (au): -629.6624710265

Zero point energy (au): 0.0880504

Entropy (kJ mol<sup>-1</sup>): 0.32874

Chemical potential (kJ mol<sup>-1</sup>): 151.34

XYZ coordinates:

12

|   |          |          |          |
|---|----------|----------|----------|
| C | -2.26181 | -0.00004 | -0.00139 |
| H | -3.35356 | -0.00010 | -0.00301 |
| C | -0.20703 | 1.25773  | 0.00126  |
| H | 0.36152  | 2.18757  | 0.00211  |
| C | -1.58065 | 1.24276  | -0.00035 |
| H | -2.15007 | 2.17125  | -0.00090 |
| C | 0.53135  | 0.00004  | 0.00149  |
| C | -0.20696 | -1.25770 | 0.00122  |
| H | 0.36168  | -2.18749 | 0.00202  |
| C | -1.58057 | -1.24282 | -0.00036 |
| H | -2.14995 | -2.17133 | -0.00091 |
| S | 2.18663  | 0.00008  | 0.00068  |

Vibrational Spectrum:

| # mode # | symmetry | wave number<br>cm <sup>**(-1)</sup> | km/mol   | IR intensity<br>IR | selection rules<br>RAMAN |
|----------|----------|-------------------------------------|----------|--------------------|--------------------------|
| 1        |          | 0.00                                | 0.00000  | -                  | -                        |
| 2        |          | 0.00                                | 0.00000  | -                  | -                        |
| 3        |          | 0.00                                | 0.00000  | -                  | -                        |
| 4        |          | 0.00                                | 0.00000  | -                  | -                        |
| 5        |          | 0.00                                | 0.00000  | -                  | -                        |
| 6        |          | 0.00                                | 0.00000  | -                  | -                        |
| 7        | a        | 100.18                              | 0.00211  | YES                | YES                      |
| 8        | a        | 290.93                              | 0.00137  | YES                | YES                      |
| 9        | a        | 302.89                              | 0.00000  | YES                | YES                      |
| 10       | a        | 357.88                              | 0.30587  | YES                | YES                      |
| 11       | a        | 428.06                              | 0.20155  | YES                | YES                      |
| 12       | a        | 565.83                              | 2.41127  | YES                | YES                      |
| 13       | a        | 602.92                              | 41.89345 | YES                | YES                      |
| 14       | a        | 717.64                              | 3.70454  | YES                | YES                      |
| 15       | a        | 786.09                              | 31.59819 | YES                | YES                      |
| 16       | a        | 799.75                              | 0.00000  | YES                | YES                      |
| 17       | a        | 967.13                              | 6.16503  | YES                | YES                      |
| 18       | a        | 983.43                              | 8.23508  | YES                | YES                      |
| 19       | a        | 987.15                              | 0.88116  | YES                | YES                      |
| 20       | a        | 996.07                              | 0.00001  | YES                | YES                      |
| 21       | a        | 1018.22                             | 1.83927  | YES                | YES                      |
| 22       | a        | 1075.39                             | 3.34157  | YES                | YES                      |
| 23       | a        | 1122.63                             | 21.69596 | YES                | YES                      |
| 24       | a        | 1154.07                             | 13.63161 | YES                | YES                      |



|    |   |         |           |     |     |
|----|---|---------|-----------|-----|-----|
| 25 | a | 1188.65 | 0.89158   | YES | YES |
| 26 | a | 1242.64 | 4.25495   | YES | YES |
| 27 | a | 1352.10 | 1.47093   | YES | YES |
| 28 | a | 1417.31 | 17.31537  | YES | YES |
| 29 | a | 1437.44 | 97.69182  | YES | YES |
| 30 | a | 1502.70 | 14.00518  | YES | YES |
| 31 | a | 1591.28 | 130.04811 | YES | YES |
| 32 | a | 3114.63 | 0.82861   | YES | YES |
| 33 | a | 3129.94 | 1.48883   | YES | YES |
| 34 | a | 3131.62 | 8.55309   | YES | YES |
| 35 | a | 3141.34 | 15.08453  | YES | YES |
| 36 | a | 3143.74 | 0.21805   | YES | YES |

## PhSCI.GaCl3\_iso2

bp86-d3\_def2-tzvpp energy (au): -4396.3903114070

Zero point energy (au): 0.0946623

Entropy (kJ mol<sup>-1</sup>): 0.54742

Chemical potential (kJ mol<sup>-1</sup>): 127.41

XYZ coordinates:

17

|    |          |          |          |
|----|----------|----------|----------|
| S  | 0.29509  | 0.98241  | 1.82167  |
| C  | -0.91818 | 0.00730  | 1.01746  |
| C  | -0.87645 | -0.10110 | -0.38565 |
| H  | -0.06048 | 0.36547  | -0.93417 |
| C  | -1.86452 | -0.82791 | -1.04605 |
| H  | -1.83609 | -0.91615 | -2.13136 |
| C  | -2.86688 | -1.46848 | -0.31325 |
| H  | -3.62558 | -2.05434 | -0.83208 |
| C  | -2.90000 | -1.37412 | 1.08444  |
| H  | -3.68220 | -1.88174 | 1.64785  |
| C  | -1.93507 | -0.63026 | 1.75385  |
| H  | -1.94551 | -0.54365 | 2.83958  |
| Ga | 2.24478  | -2.07114 | 0.77262  |
| Cl | 1.61807  | -0.48729 | 2.64669  |
| Cl | 3.92812  | -2.96628 | 1.78115  |
| Cl | 2.62751  | -0.68207 | -0.83820 |
| Cl | 0.44141  | -3.25365 | 0.63743  |

Vibrational Spectrum (first 50 lines):

| # mode # | symmetry | wave number<br>cm <sup>**(-1)</sup> | IR intensity<br>km/mol | IR  | selection rules<br>RAMAN |
|----------|----------|-------------------------------------|------------------------|-----|--------------------------|
| 1        |          | 0.00                                | 0.00000                | -   | -                        |
| 2        |          | 0.00                                | 0.00000                | -   | -                        |
| 3        |          | 0.00                                | 0.00000                | -   | -                        |
| 4        |          | 0.00                                | 0.00000                | -   | -                        |
| 5        |          | 0.00                                | 0.00000                | -   | -                        |
| 6        |          | 0.00                                | 0.00000                | -   | -                        |
| 7        | a        | 28.29                               | 0.34861                | YES | YES                      |
| 8        | a        | 47.53                               | 0.47937                | YES | YES                      |
| 9        | a        | 56.57                               | 0.00090                | YES | YES                      |
| 10       | a        | 65.86                               | 1.04879                | YES | YES                      |
| 11       | a        | 73.53                               | 0.07715                | YES | YES                      |
| 12       | a        | 99.07                               | 0.35324                | YES | YES                      |
| 13       | a        | 103.14                              | 0.67925                | YES | YES                      |
| 14       | a        | 122.02                              | 4.08102                | YES | YES                      |
| 15       | a        | 125.97                              | 5.53411                | YES | YES                      |
| 16       | a        | 137.15                              | 25.84846               | YES | YES                      |
| 17       | a        | 169.55                              | 24.10540               | YES | YES                      |
| 18       | a        | 235.54                              | 4.85213                | YES | YES                      |
| 19       | a        | 272.18                              | 2.45470                | YES | YES                      |
| 20       | a        | 342.96                              | 11.91649               | YES | YES                      |

|    |   |         |          |     |     |
|----|---|---------|----------|-----|-----|
| 21 | a | 377.84  | 38.35038 | YES | YES |
| 22 | a | 392.05  | 1.69466  | YES | YES |
| 23 | a | 406.83  | 6.35091  | YES | YES |
| 24 | a | 415.27  | 65.16579 | YES | YES |
| 25 | a | 420.80  | 82.25474 | YES | YES |
| 26 | a | 481.94  | 12.15404 | YES | YES |
| 27 | a | 604.48  | 0.02943  | YES | YES |
| 28 | a | 672.48  | 37.97673 | YES | YES |
| 29 | a | 705.16  | 1.87677  | YES | YES |
| 30 | a | 747.97  | 38.06638 | YES | YES |
| 31 | a | 825.25  | 1.82409  | YES | YES |
| 32 | a | 923.28  | 3.34902  | YES | YES |
| 33 | a | 962.70  | 0.64026  | YES | YES |
| 34 | a | 984.94  | 0.16609  | YES | YES |
| 35 | a | 991.99  | 2.02412  | YES | YES |
| 36 | a | 1017.85 | 0.09358  | YES | YES |
| 37 | a | 1063.12 | 33.56447 | YES | YES |
| 38 | a | 1074.93 | 6.34838  | YES | YES |
| 39 | a | 1156.24 | 0.35356  | YES | YES |
| 40 | a | 1169.40 | 2.83536  | YES | YES |
| 41 | a | 1290.76 | 1.00923  | YES | YES |
| 42 | a | 1340.40 | 5.64126  | YES | YES |
| 43 | a | 1431.50 | 13.93469 | YES | YES |
| 44 | a | 1455.96 | 0.82231  | YES | YES |
| 45 | a | 1560.58 | 0.80390  | YES | YES |
| 46 | a | 1573.53 | 22.13211 | YES | YES |
| 47 | a | 3106.94 | 0.36569  | YES | YES |
| 48 | a | 3118.03 | 3.73629  | YES | YES |
| 49 | a | 3125.87 | 5.41407  | YES | YES |
| 50 | a | 3132.82 | 5.73460  | YES | YES |

## [PhSe]<sup>+</sup>

bp86-d3\_def2-tzvpp energy (au): -2633.2606731340

Zero point energy (au): 0.0874825

Entropy (kJ mol<sup>-1</sup>): 0.34047

Chemical potential (kJ mol<sup>-1</sup>): 146.83

XYZ coordinates:

12

|    |          |          |          |
|----|----------|----------|----------|
| C  | -3.00003 | -0.00007 | -0.00016 |
| H  | -4.09135 | -0.00013 | -0.00026 |
| C  | -0.93951 | 1.25215  | 0.00019  |
| H  | -0.37717 | 2.18549  | 0.00033  |
| C  | -2.31599 | 1.23888  | 0.00001  |
| H  | -2.88121 | 2.16987  | 0.00023  |
| C  | -0.21266 | 0.00002  | 0.00014  |
| C  | -0.93942 | -1.25216 | 0.00032  |
| H  | -0.37705 | -2.18548 | 0.00026  |
| C  | -2.31591 | -1.23897 | 0.00002  |
| H  | -2.88106 | -2.17001 | -0.00008 |
| Se | 1.60034  | 0.00008  | -0.00053 |

Vibrational Spectrum:

| # mode # | symmetry | wave number<br>cm <sup>**(-1)</sup> | IR intensity<br>km/mol | IR  | RAMAN | selection rules |
|----------|----------|-------------------------------------|------------------------|-----|-------|-----------------|
| 1        |          | 0.00                                | 0.00000                | -   | -     |                 |
| 2        |          | 0.00                                | 0.00000                | -   | -     |                 |
| 3        |          | 0.00                                | 0.00000                | -   | -     |                 |
| 4        |          | 0.00                                | 0.00000                | -   | -     |                 |
| 5        |          | 0.00                                | 0.00000                | -   | -     |                 |
| 6        |          | 0.00                                | 0.00000                | -   | -     |                 |
| 7        | a        | 92.88                               | 0.00479                | YES | YES   |                 |
| 8        | a        | 240.21                              | 0.00060                | YES | YES   |                 |
| 9        | a        | 311.62                              | 0.00000                | YES | YES   |                 |
| 10       | a        | 330.92                              | 0.03551                | YES | YES   |                 |
| 11       | a        | 364.08                              | 0.04692                | YES | YES   |                 |
| 12       | a        | 569.21                              | 1.80632                | YES | YES   |                 |
| 13       | a        | 608.16                              | 41.37138               | YES | YES   |                 |
| 14       | a        | 681.99                              | 3.26909                | YES | YES   |                 |
| 15       | a        | 773.80                              | 33.59309               | YES | YES   |                 |
| 16       | a        | 805.14                              | 0.00001                | YES | YES   |                 |
| 17       | a        | 971.39                              | 14.38549               | YES | YES   |                 |
| 18       | a        | 976.69                              | 0.89729                | YES | YES   |                 |
| 19       | a        | 988.92                              | 6.17189                | YES | YES   |                 |
| 20       | a        | 993.71                              | 0.00010                | YES | YES   |                 |
| 21       | a        | 1014.56                             | 1.23401                | YES | YES   |                 |
| 22       | a        | 1056.85                             | 24.65728               | YES | YES   |                 |
| 23       | a        | 1078.05                             | 3.86789                | YES | YES   |                 |
| 24       | a        | 1156.11                             | 9.49275                | YES | YES   |                 |
| 25       | a        | 1183.22                             | 4.91222                | YES | YES   |                 |

|    |   |         |           |     |     |
|----|---|---------|-----------|-----|-----|
| 26 | a | 1252.08 | 5.56957   | YES | YES |
| 27 | a | 1353.46 | 3.11711   | YES | YES |
| 28 | a | 1420.39 | 13.31610  | YES | YES |
| 29 | a | 1428.98 | 77.41372  | YES | YES |
| 30 | a | 1500.00 | 9.57197   | YES | YES |
| 31 | a | 1584.99 | 140.83584 | YES | YES |
| 32 | a | 3116.95 | 0.40110   | YES | YES |
| 33 | a | 3129.61 | 1.37081   | YES | YES |
| 34 | a | 3131.58 | 7.25232   | YES | YES |
| 35 | a | 3141.09 | 11.72519  | YES | YES |
| 36 | a | 3143.71 | 0.16757   | YES | YES |

## PhSeCl.GaCl3\_iso2

bp86-d3\_def2-tzvpp energy (au): -6399.9905396430

Zero point energy (au): 0.0938354

Entropy (kJ mol<sup>-1</sup>): 0.55997

Chemical potential (kJ mol<sup>-1</sup>): 122.48

XYZ coordinates:

17

|    |          |          |          |
|----|----------|----------|----------|
| Se | 0.35104  | 1.10861  | 1.86826  |
| C  | -0.95789 | 0.03249  | 1.00292  |
| C  | -0.90403 | -0.10396 | -0.39467 |
| H  | -0.09180 | 0.35658  | -0.95393 |
| C  | -1.87746 | -0.86287 | -1.04244 |
| H  | -1.83995 | -0.97766 | -2.12508 |
| C  | -2.87567 | -1.49954 | -0.30050 |
| H  | -3.62282 | -2.10835 | -0.80960 |
| C  | -2.91763 | -1.37287 | 1.09353  |
| H  | -3.69494 | -1.87837 | 1.66575  |
| C  | -1.96519 | -0.60019 | 1.75158  |
| H  | -1.98561 | -0.49194 | 2.83512  |
| Ga | 2.26367  | -2.07338 | 0.76306  |
| Cl | 1.72899  | -0.51820 | 2.67168  |
| Cl | 3.96716  | -3.00954 | 1.70022  |
| Cl | 2.62493  | -0.67453 | -0.84688 |
| Cl | 0.44121  | -3.22928 | 0.64296  |

Vibrational Spectrum (first 50 lines):

| #  | mode | symmetry             | wave number | IR intensity | selection rules |
|----|------|----------------------|-------------|--------------|-----------------|
| #  |      | cm <sup>**(-1)</sup> | km/mol      | IR           | RAMAN           |
| 1  |      | 0.00                 | 0.00000     | -            | -               |
| 2  |      | 0.00                 | 0.00000     | -            | -               |
| 3  |      | 0.00                 | 0.00000     | -            | -               |
| 4  |      | 0.00                 | 0.00000     | -            | -               |
| 5  |      | 0.00                 | 0.00000     | -            | -               |
| 6  |      | 0.00                 | 0.00000     | -            | -               |
| 7  | a    | 28.34                | 0.22112     | YES          | YES             |
| 8  | a    | 46.38                | 0.23431     | YES          | YES             |
| 9  | a    | 53.55                | 0.20080     | YES          | YES             |
| 10 | a    | 58.20                | 0.87532     | YES          | YES             |
| 11 | a    | 71.36                | 0.02647     | YES          | YES             |
| 12 | a    | 89.82                | 0.12134     | YES          | YES             |
| 13 | a    | 97.92                | 0.25507     | YES          | YES             |
| 14 | a    | 122.07               | 4.21270     | YES          | YES             |
| 15 | a    | 125.12               | 5.50554     | YES          | YES             |
| 16 | a    | 136.31               | 24.11961    | YES          | YES             |
| 17 | a    | 171.08               | 24.75813    | YES          | YES             |
| 18 | a    | 214.85               | 4.53918     | YES          | YES             |
| 19 | a    | 232.12               | 0.80803     | YES          | YES             |

|    |   |         |          |     |     |
|----|---|---------|----------|-----|-----|
| 20 | a | 298.16  | 31.41035 | YES | YES |
| 21 | a | 315.35  | 10.98643 | YES | YES |
| 22 | a | 346.81  | 5.80637  | YES | YES |
| 23 | a | 392.45  | 0.90013  | YES | YES |
| 24 | a | 413.64  | 60.26055 | YES | YES |
| 25 | a | 419.62  | 72.63105 | YES | YES |
| 26 | a | 454.25  | 7.89304  | YES | YES |
| 27 | a | 603.79  | 0.05322  | YES | YES |
| 28 | a | 672.59  | 1.46546  | YES | YES |
| 29 | a | 674.41  | 33.10119 | YES | YES |
| 30 | a | 739.10  | 41.92552 | YES | YES |
| 31 | a | 825.56  | 1.45026  | YES | YES |
| 32 | a | 919.48  | 2.76295  | YES | YES |
| 33 | a | 961.30  | 0.47277  | YES | YES |
| 34 | a | 983.63  | 0.26266  | YES | YES |
| 35 | a | 991.19  | 2.33203  | YES | YES |
| 36 | a | 1013.55 | 1.13735  | YES | YES |
| 37 | a | 1048.63 | 23.85653 | YES | YES |
| 38 | a | 1073.43 | 3.65970  | YES | YES |
| 39 | a | 1155.85 | 0.26258  | YES | YES |
| 40 | a | 1170.53 | 4.31827  | YES | YES |
| 41 | a | 1292.59 | 1.59288  | YES | YES |
| 42 | a | 1337.76 | 5.16478  | YES | YES |
| 43 | a | 1429.70 | 13.74799 | YES | YES |
| 44 | a | 1454.88 | 0.87019  | YES | YES |
| 45 | a | 1561.52 | 1.30591  | YES | YES |
| 46 | a | 1568.74 | 17.05232 | YES | YES |
| 47 | a | 3106.79 | 0.40197  | YES | YES |
| 48 | a | 3117.83 | 4.10211  | YES | YES |
| 49 | a | 3125.75 | 4.99700  | YES | YES |
| 50 | a | 3132.73 | 5.69652  | YES | YES |

**[PhSe(PPh3)]+**

bp86-d3\_def2-tzvpp energy (au): -3670.0876135790

Zero point energy (au): 0.3570830

Entropy (kJ mol<sup>-1</sup>): 0.71020

Chemical potential (kJ mol<sup>-1</sup>): 790.16

XYZ coordinates:

46

|    |          |          |          |
|----|----------|----------|----------|
| C  | -1.03007 | 5.00723  | -1.15208 |
| H  | -1.25861 | 6.03870  | -1.41848 |
| C  | 2.76235  | -1.79097 | -1.67433 |
| H  | 3.23091  | -2.74152 | -1.42265 |
| Se | -1.98726 | -0.46901 | -0.25782 |
| P  | -0.04415 | 0.66391  | -0.03692 |
| C  | 2.50109  | 0.09248  | -3.17852 |
| H  | 2.77290  | 0.61254  | -4.09631 |
| C  | -1.48431 | 3.96235  | -1.96337 |
| H  | -2.06531 | 4.17661  | -2.85949 |
| C  | -0.45032 | 2.36654  | -0.46601 |
| C  | 1.82171  | -1.23923 | -0.80734 |
| H  | 1.56234  | -1.75911 | 0.11452  |
| C  | 1.48048  | 0.63580  | 4.29639  |
| H  | 1.84100  | 0.64896  | 5.32450  |
| C  | 1.21635  | -0.00965 | -1.13157 |
| C  | -0.31594 | -4.21894 | -1.12887 |
| H  | -0.09996 | -4.79689 | -2.02685 |
| C  | -1.19968 | 2.64023  | -1.62578 |
| H  | -1.55840 | 1.82718  | -2.25741 |
| C  | 0.55672  | 0.58768  | 1.66363  |
| C  | 0.10548  | 0.60306  | 4.04080  |
| H  | -0.60528 | 0.59338  | 4.86624  |
| C  | 1.55627  | 0.65574  | -2.32160 |
| H  | 1.09878  | 1.61207  | -2.57162 |
| C  | 3.10097  | -1.12885 | -2.85806 |
| H  | 3.83938  | -1.56350 | -3.53121 |
| C  | 0.00254  | 3.41551  | 0.35153  |
| H  | 0.57359  | 3.20425  | 1.25493  |
| C  | 1.93857  | 0.62855  | 1.91919  |
| H  | 2.65280  | 0.64356  | 1.09697  |
| C  | -0.36101 | 0.57947  | 2.72752  |
| H  | -1.43207 | 0.54797  | 2.52678  |
| C  | -0.88634 | -2.73679 | 1.18299  |
| H  | -1.11232 | -2.15945 | 2.07795  |
| C  | -0.29020 | 4.73392  | 0.00150  |
| H  | 0.05782  | 5.54859  | 0.63531  |
| C  | 2.39334  | 0.65108  | 3.23843  |
| H  | 3.46393  | 0.67957  | 3.43791  |
| C  | -0.27439 | -3.98816 | 1.28430  |
| H  | -0.02822 | -4.38872 | 2.26720  |
| C  | -0.91533 | -2.96268 | -1.24568 |
| H  | -1.15218 | -2.55237 | -2.22606 |
| C  | 0.01120  | -4.72656 | 0.13127  |
| H  | 0.48301  | -5.70496 | 0.21691  |



C     -1.19424     -2.23134     -0.08583

Vibrational Spectrum (first 50 lines):

| #  | mode | symmetry | wave number | IR intensity | selection rules |
|----|------|----------|-------------|--------------|-----------------|
| #  |      | cm**(-1) | km/mol      | IR           | RAMAN           |
| 1  |      | 0.00     | 0.00000     | -            | -               |
| 2  |      | 0.00     | 0.00000     | -            | -               |
| 3  |      | 0.00     | 0.00000     | -            | -               |
| 4  |      | 0.00     | 0.00000     | -            | -               |
| 5  |      | 0.00     | 0.00000     | -            | -               |
| 6  |      | 0.00     | 0.00000     | -            | -               |
| 7  | a    | 14.43    | 0.07798     | YES          | YES             |
| 8  | a    | 30.25    | 0.02390     | YES          | YES             |
| 9  | a    | 38.49    | 0.14963     | YES          | YES             |
| 10 | a    | 45.31    | 0.07136     | YES          | YES             |
| 11 | a    | 47.69    | 0.17102     | YES          | YES             |
| 12 | a    | 55.29    | 0.16034     | YES          | YES             |
| 13 | a    | 60.10    | 0.10101     | YES          | YES             |
| 14 | a    | 67.06    | 0.09922     | YES          | YES             |
| 15 | a    | 82.80    | 0.11003     | YES          | YES             |
| 16 | a    | 89.21    | 0.37226     | YES          | YES             |
| 17 | a    | 98.08    | 0.38281     | YES          | YES             |
| 18 | a    | 182.02   | 1.59622     | YES          | YES             |
| 19 | a    | 188.89   | 1.27550     | YES          | YES             |
| 20 | a    | 206.15   | 1.45794     | YES          | YES             |
| 21 | a    | 213.32   | 0.14108     | YES          | YES             |
| 22 | a    | 228.91   | 1.18393     | YES          | YES             |
| 23 | a    | 240.35   | 0.63311     | YES          | YES             |
| 24 | a    | 243.57   | 0.81700     | YES          | YES             |
| 25 | a    | 255.32   | 0.39825     | YES          | YES             |
| 26 | a    | 267.06   | 0.24853     | YES          | YES             |
| 27 | a    | 296.91   | 0.57433     | YES          | YES             |
| 28 | a    | 387.95   | 0.07777     | YES          | YES             |
| 29 | a    | 389.07   | 0.02121     | YES          | YES             |
| 30 | a    | 396.27   | 0.06921     | YES          | YES             |
| 31 | a    | 397.91   | 0.32905     | YES          | YES             |
| 32 | a    | 417.84   | 6.79991     | YES          | YES             |
| 33 | a    | 434.39   | 7.67561     | YES          | YES             |
| 34 | a    | 442.54   | 6.54467     | YES          | YES             |
| 35 | a    | 461.91   | 6.54367     | YES          | YES             |
| 36 | a    | 491.17   | 51.50704    | YES          | YES             |
| 37 | a    | 505.76   | 75.20848    | YES          | YES             |
| 38 | a    | 520.32   | 75.74747    | YES          | YES             |
| 39 | a    | 604.88   | 0.00486     | YES          | YES             |
| 40 | a    | 605.84   | 0.43456     | YES          | YES             |
| 41 | a    | 608.27   | 0.06254     | YES          | YES             |
| 42 | a    | 609.00   | 0.12940     | YES          | YES             |
| 43 | a    | 660.94   | 2.42094     | YES          | YES             |
| 44 | a    | 679.22   | 3.96503     | YES          | YES             |
| 45 | a    | 685.54   | 0.22423     | YES          | YES             |
| 46 | a    | 686.30   | 64.73354    | YES          | YES             |
| 47 | a    | 687.38   | 21.92729    | YES          | YES             |
| 48 | a    | 689.92   | 8.37274     | YES          | YES             |
| 49 | a    | 712.55   | 25.87330    | YES          | YES             |
| 50 | a    | 713.90   | 31.17941    | YES          | YES             |

**[PhSe(PPh3).PPh3]<sup>+</sup>**

bp86-d3\_def2-tzvpp energy (au): -4706.7874280170

Zero point energy (au): 0.6237177

Entropy (kJ mol<sup>-1</sup>): 1.11976

Chemical potential (kJ mol<sup>-1</sup>): 1417.06

XYZ coordinates:

80

|    |          |          |          |
|----|----------|----------|----------|
| C  | -4.72713 | 0.67722  | 3.88253  |
| H  | -5.76080 | 0.84166  | 4.18587  |
| C  | 2.87383  | 2.26859  | 3.59809  |
| H  | 3.95245  | 2.21217  | 3.45422  |
| Se | -0.47590 | 0.00481  | -0.00313 |
| P  | -0.36292 | 0.01159  | 2.55666  |
| C  | 0.92563  | 3.41866  | 4.45892  |
| H  | 0.48282  | 4.25849  | 4.99386  |
| C  | -4.16287 | 1.46199  | 2.87230  |
| H  | -4.75359 | 2.23864  | 2.38726  |
| C  | -2.07256 | 0.25188  | 3.10636  |
| C  | 2.06094  | 1.25207  | 3.10071  |
| H  | 2.50986  | 0.41001  | 2.57367  |
| C  | 1.01085  | -4.09378 | 4.14837  |
| H  | 1.32795  | -5.07106 | 4.51151  |
| C  | 0.66625  | 1.31196  | 3.28717  |
| C  | 3.55392  | 1.19055  | -0.25194 |
| H  | 4.09504  | 2.11404  | -0.45610 |
| C  | -2.84211 | 1.24775  | 2.47753  |
| H  | -2.40435 | 1.85625  | 1.68487  |
| C  | 0.20465  | -1.58187 | 3.21250  |
| C  | 0.19144  | -4.00004 | 3.01851  |
| H  | -0.13262 | -4.90260 | 2.50080  |
| C  | 0.10251  | 2.40286  | 3.96889  |
| H  | -0.97436 | 2.45442  | 4.12636  |
| C  | 2.30900  | 3.35493  | 4.27435  |
| H  | 2.94775  | 4.14881  | 4.66068  |
| C  | -2.64347 | -0.53542 | 4.11903  |
| H  | -2.05469 | -1.31340 | 4.60445  |
| C  | 1.02061  | -1.67969 | 4.35030  |
| H  | 1.33975  | -0.77964 | 4.87467  |
| C  | -0.20702 | -2.74993 | 2.54713  |
| H  | -0.83373 | -2.67478 | 1.65749  |
| C  | 2.15714  | -1.18030 | 0.27012  |
| H  | 1.61131  | -2.10251 | 0.46064  |
| C  | -3.96838 | -0.32020 | 4.50161  |
| H  | -4.40849 | -0.93272 | 5.28813  |
| C  | 1.42277  | -2.93505 | 4.81145  |
| H  | 2.05678  | -3.00630 | 5.69494  |
| C  | 3.55399  | -1.17098 | 0.28780  |
| H  | 4.09520  | -2.09298 | 0.49824  |
| C  | 2.15688  | 1.19594  | -0.25071 |
| H  | 1.61076  | 2.11665  | -0.44772 |
| C  | 4.25221  | 0.01079  | 0.02226  |
| H  | 5.34189  | 0.01239  | 0.02907  |

|   |          |          |          |
|---|----------|----------|----------|
| C | 1.46395  | 0.00693  | 0.00604  |
| C | -4.68674 | -0.70807 | -3.92524 |
| H | -5.71566 | -0.87968 | -4.24039 |
| C | 2.91729  | -2.25783 | -3.55225 |
| H | 3.99544  | -2.18828 | -3.41062 |
| P | -0.34130 | -0.01245 | -2.55360 |
| C | 0.97945  | -3.44367 | -4.38766 |
| H | 0.54424  | -4.29837 | -4.90497 |
| C | -4.13518 | -1.47524 | -2.89477 |
| H | -4.73120 | -2.24510 | -2.40542 |
| C | -2.04409 | -0.26476 | -3.11914 |
| C | 2.09522  | -1.23915 | -3.07472 |
| H | 2.53637  | -0.38273 | -2.56438 |
| C | 1.03135  | 4.08270  | -4.17156 |
| H | 1.34769  | 5.05763  | -4.54155 |
| C | 0.70108  | -1.31576 | -3.25930 |
| C | -2.82031 | -1.25226 | -2.48532 |
| H | -2.39247 | -1.84749 | -1.67735 |
| C | 0.22728  | 1.57701  | -3.21794 |
| C | 0.21228  | 3.99633  | -3.04092 |
| H | -0.11215 | 4.90225  | -2.52939 |
| C | 0.14717  | -2.42573 | -3.91805 |
| H | -0.92925 | -2.49048 | -4.07397 |
| C | 2.36230  | -3.36300 | -4.20576 |
| H | 3.00830  | -4.15843 | -4.57650 |
| C | -2.60254 | 0.50546  | -4.15183 |
| H | -2.00873 | 1.27720  | -4.64116 |
| C | 1.04276  | 1.66734  | -4.35686 |
| H | 1.36253  | 0.76379  | -4.87490 |
| C | -0.18537 | 2.74927  | -2.56075 |
| H | -0.81193 | 2.67977  | -1.67052 |
| C | -3.92145 | 0.28116  | -4.54944 |
| H | -4.35181 | 0.88031  | -5.35149 |
| C | 1.44388  | 2.91972  | -4.82684 |
| H | 2.07764  | 2.98529  | -5.71096 |

Vibrational Spectrum (first 50 lines):

| #  | mode | symmetry | wave number | IR intensity | selection rules |
|----|------|----------|-------------|--------------|-----------------|
| #  |      | cm**(-1) | km/mol      | IR           | RAMAN           |
| 1  |      | 0.00     | 0.00000     | -            | -               |
| 2  |      | 0.00     | 0.00000     | -            | -               |
| 3  |      | 0.00     | 0.00000     | -            | -               |
| 4  |      | 0.00     | 0.00000     | -            | -               |
| 5  |      | 0.00     | 0.00000     | -            | -               |
| 6  |      | 0.00     | 0.00000     | -            | -               |
| 7  | a    | 5.88     | 0.00286     | YES          | YES             |
| 8  | a    | 7.75     | 0.13103     | YES          | YES             |
| 9  | a    | 18.24    | 0.00455     | YES          | YES             |
| 10 | a    | 23.00    | 0.00701     | YES          | YES             |
| 11 | a    | 23.18    | 0.09220     | YES          | YES             |
| 12 | a    | 26.33    | 0.03969     | YES          | YES             |
| 13 | a    | 35.97    | 0.07380     | YES          | YES             |
| 14 | a    | 38.67    | 0.03970     | YES          | YES             |
| 15 | a    | 40.48    | 2.74725     | YES          | YES             |
| 16 | a    | 43.28    | 0.04774     | YES          | YES             |
| 17 | a    | 45.54    | 6.24987     | YES          | YES             |

|    |   |        |          |     |     |
|----|---|--------|----------|-----|-----|
| 18 | a | 48.74  | 0.74447  | YES | YES |
| 19 | a | 52.27  | 0.14524  | YES | YES |
| 20 | a | 56.56  | 0.02899  | YES | YES |
| 21 | a | 58.98  | 0.02477  | YES | YES |
| 22 | a | 60.22  | 21.36435 | YES | YES |
| 23 | a | 73.69  | 0.37858  | YES | YES |
| 24 | a | 73.96  | 0.01283  | YES | YES |
| 25 | a | 80.73  | 24.37585 | YES | YES |
| 26 | a | 87.96  | 0.00673  | YES | YES |
| 27 | a | 93.62  | 89.40082 | YES | YES |
| 28 | a | 103.41 | 0.08126  | YES | YES |
| 29 | a | 115.29 | 0.83777  | YES | YES |
| 30 | a | 124.49 | 0.04887  | YES | YES |
| 31 | a | 182.22 | 2.97204  | YES | YES |
| 32 | a | 183.18 | 0.43642  | YES | YES |
| 33 | a | 192.82 | 0.25353  | YES | YES |
| 34 | a | 194.74 | 4.36579  | YES | YES |
| 35 | a | 202.19 | 0.99984  | YES | YES |
| 36 | a | 203.74 | 3.05765  | YES | YES |
| 37 | a | 216.54 | 11.99671 | YES | YES |
| 38 | a | 236.25 | 7.62052  | YES | YES |
| 39 | a | 237.84 | 0.34273  | YES | YES |
| 40 | a | 238.37 | 0.41145  | YES | YES |
| 41 | a | 252.46 | 0.10658  | YES | YES |
| 42 | a | 253.17 | 1.59229  | YES | YES |
| 43 | a | 263.96 | 0.94950  | YES | YES |
| 44 | a | 264.83 | 0.19526  | YES | YES |
| 45 | a | 304.72 | 0.02490  | YES | YES |
| 46 | a | 387.89 | 0.00330  | YES | YES |
| 47 | a | 388.52 | 0.14396  | YES | YES |
| 48 | a | 388.88 | 0.19709  | YES | YES |
| 49 | a | 389.26 | 1.02459  | YES | YES |
| 50 | a | 390.45 | 0.33747  | YES | YES |

**[PhSe(PtBu3).PPh3]+**

bp86-d3\_def2-tzvpp energy (au): -4485.2910788000

Zero point energy (au): 0.7160305

Entropy (kJ mol<sup>-1</sup>): 1.08565

Chemical potential (kJ mol<sup>-1</sup>): 1674.77

XYZ coordinates:

86

|    |          |          |          |
|----|----------|----------|----------|
| P  | -2.05919 | 0.38462  | -0.03737 |
| Se | 0.52559  | 0.23680  | 0.04992  |
| C  | 0.27582  | -1.69269 | 0.13388  |
| C  | -0.06718 | -2.38342 | -1.03648 |
| H  | -0.14991 | -1.84967 | -1.98211 |
| C  | -0.33003 | -3.75409 | -0.98108 |
| H  | -0.60305 | -4.28576 | -1.89223 |
| C  | -0.24262 | -4.43805 | 0.23525  |
| H  | -0.44146 | -5.50865 | 0.27449  |
| C  | 0.08829  | -3.74411 | 1.40147  |
| H  | 0.13823  | -4.26716 | 2.35613  |
| C  | 0.33521  | -2.36925 | 1.35648  |
| H  | 0.55191  | -1.82775 | 2.27333  |
| C  | -3.00721 | -0.46146 | 1.25347  |
| C  | -2.98099 | -1.86907 | 1.28965  |
| H  | -2.44679 | -2.42853 | 0.52149  |
| C  | -3.64838 | -2.55223 | 2.30441  |
| H  | -3.62976 | -3.64173 | 2.32098  |
| C  | -4.33433 | -1.84426 | 3.29679  |
| H  | -4.85270 | -2.38142 | 4.09062  |
| C  | -4.35744 | -0.44752 | 3.26722  |
| H  | -4.89734 | 0.10719  | 4.03428  |
| C  | -3.69802 | 0.24632  | 2.25070  |
| H  | -3.72863 | 1.33532  | 2.22846  |
| C  | -2.37004 | 2.16670  | 0.09755  |
| C  | -3.25489 | 2.83694  | -0.76180 |
| H  | -3.79267 | 2.28322  | -1.53109 |
| C  | -3.44313 | 4.21394  | -0.63067 |
| H  | -4.13180 | 4.72992  | -1.29926 |
| C  | -2.75580 | 4.92789  | 0.35505  |
| H  | -2.90725 | 6.00247  | 0.45424  |
| C  | -1.87343 | 4.26471  | 1.21329  |
| H  | -1.33779 | 4.81969  | 1.98317  |
| C  | -1.67383 | 2.89008  | 1.08337  |
| H  | -0.98250 | 2.37375  | 1.75112  |
| C  | -2.69804 | -0.15318 | -1.64880 |
| C  | -3.88223 | -0.89262 | -1.78999 |
| H  | -4.47159 | -1.15526 | -0.91228 |
| C  | -4.30770 | -1.29013 | -3.05974 |
| H  | -5.22836 | -1.86394 | -3.16342 |
| C  | -3.56326 | -0.94858 | -4.19145 |
| H  | -3.89985 | -1.26013 | -5.17993 |
| C  | -2.38593 | -0.20475 | -4.05560 |
| H  | -1.80517 | 0.06636  | -4.93705 |
| C  | -1.94982 | 0.18647  | -2.79076 |

|   |          |          |          |
|---|----------|----------|----------|
| H | -1.02413 | 0.75377  | -2.68247 |
| P | 3.10867  | 0.29871  | 0.06136  |
| C | 3.42880  | 1.89448  | -0.96547 |
| C | 4.82917  | 2.49393  | -0.73607 |
| H | 4.95535  | 3.34956  | -1.41690 |
| C | 2.36086  | 2.96388  | -0.63152 |
| H | 2.57750  | 3.85323  | -1.24190 |
| H | 2.35958  | 3.28095  | 0.41306  |
| H | 1.34793  | 2.63459  | -0.89684 |
| C | 3.67563  | 0.56536  | 1.87801  |
| C | 5.19758  | 0.43547  | 2.07439  |
| H | 5.43304  | 0.66943  | 3.12375  |
| H | 5.76716  | 1.12985  | 1.44768  |
| H | 5.55941  | -0.58062 | 1.88352  |
| H | 3.12524  | -1.49846 | 2.50279  |
| H | 1.86506  | -0.27274 | 2.76862  |
| H | 3.29937  | -0.31835 | 3.80911  |
| C | 3.22094  | 1.95426  | 2.36990  |
| H | 2.14265  | 2.10528  | 2.22812  |
| H | 3.76469  | 2.77889  | 1.89853  |
| H | 3.42014  | 2.01075  | 3.45030  |
| C | 4.01986  | -1.20160 | -0.72318 |
| C | 3.97508  | -2.38542 | 0.26476  |
| H | 4.39232  | -3.26590 | -0.24551 |
| H | 2.94870  | -2.63511 | 0.56241  |
| H | 4.57924  | -2.21848 | 1.16238  |
| C | 5.48360  | -0.90700 | -1.10106 |
| H | 6.08987  | -0.57776 | -0.25133 |
| H | 5.56547  | -0.15915 | -1.89752 |
| H | 5.93167  | -1.83620 | -1.48528 |
| C | 3.25715  | -1.65526 | -1.98641 |
| H | 3.29897  | -0.93422 | -2.80511 |
| H | 2.20877  | -1.88026 | -1.76941 |
| H | 3.72493  | -2.58401 | -2.34568 |
| H | 4.96170  | 2.87268  | 0.28300  |
| H | 5.63587  | 1.78480  | -0.94798 |
| C | 3.25813  | 1.57419  | -2.46388 |
| H | 3.27764  | 2.52355  | -3.01901 |
| H | 4.06740  | 0.95297  | -2.86090 |
| H | 2.29609  | 1.08781  | -2.67193 |
| C | 2.94635  | -0.45597 | 2.77631  |

Vibrational Spectrum (first 50 lines):

| #  | mode | symmetry | wave number | IR intensity | selection rules |
|----|------|----------|-------------|--------------|-----------------|
| #  |      |          | cm**(-1)    | km/mol       | IR RAMAN        |
| 1  |      |          | 0.00        | 0.00000      | - -             |
| 2  |      |          | 0.00        | 0.00000      | - -             |
| 3  |      |          | 0.00        | 0.00000      | - -             |
| 4  |      |          | 0.00        | 0.00000      | - -             |
| 5  |      |          | 0.00        | 0.00000      | - -             |
| 6  |      |          | 0.00        | 0.00000      | - -             |
| 7  | a    |          | 11.32       | 0.09564      | YES YES         |
| 8  | a    |          | 16.40       | 0.04808      | YES YES         |
| 9  | a    |          | 23.14       | 0.34415      | YES YES         |
| 10 | a    |          | 25.03       | 0.14258      | YES YES         |
| 11 | a    |          | 38.88       | 3.79306      | YES YES         |

|    |   |        |          |     |     |
|----|---|--------|----------|-----|-----|
| 12 | a | 43.06  | 0.86337  | YES | YES |
| 13 | a | 48.72  | 0.11583  | YES | YES |
| 14 | a | 51.83  | 1.68161  | YES | YES |
| 15 | a | 55.66  | 2.90898  | YES | YES |
| 16 | a | 58.52  | 15.08528 | YES | YES |
| 17 | a | 62.47  | 13.45723 | YES | YES |
| 18 | a | 74.29  | 38.65931 | YES | YES |
| 19 | a | 75.74  | 7.81731  | YES | YES |
| 20 | a | 82.81  | 7.20340  | YES | YES |
| 21 | a | 95.65  | 0.04491  | YES | YES |
| 22 | a | 97.24  | 10.47810 | YES | YES |
| 23 | a | 101.41 | 0.50756  | YES | YES |
| 24 | a | 108.95 | 13.83704 | YES | YES |
| 25 | a | 119.52 | 0.87410  | YES | YES |
| 26 | a | 126.24 | 0.33029  | YES | YES |
| 27 | a | 129.60 | 0.27033  | YES | YES |
| 28 | a | 166.00 | 0.07684  | YES | YES |
| 29 | a | 183.46 | 1.24840  | YES | YES |
| 30 | a | 189.93 | 0.30960  | YES | YES |
| 31 | a | 194.61 | 1.60993  | YES | YES |
| 32 | a | 196.98 | 1.81869  | YES | YES |
| 33 | a | 197.23 | 0.33167  | YES | YES |
| 34 | a | 202.65 | 0.79475  | YES | YES |
| 35 | a | 205.23 | 0.99582  | YES | YES |
| 36 | a | 211.55 | 0.38625  | YES | YES |
| 37 | a | 221.57 | 16.14691 | YES | YES |
| 38 | a | 226.90 | 0.20270  | YES | YES |
| 39 | a | 234.80 | 4.09854  | YES | YES |
| 40 | a | 237.74 | 0.64877  | YES | YES |
| 41 | a | 241.18 | 0.28331  | YES | YES |
| 42 | a | 251.12 | 0.18108  | YES | YES |
| 43 | a | 254.37 | 1.11001  | YES | YES |
| 44 | a | 254.54 | 0.41301  | YES | YES |
| 45 | a | 257.55 | 0.40045  | YES | YES |
| 46 | a | 263.67 | 0.63480  | YES | YES |
| 47 | a | 272.18 | 0.55035  | YES | YES |
| 48 | a | 275.81 | 0.04960  | YES | YES |
| 49 | a | 279.55 | 0.04045  | YES | YES |
| 50 | a | 289.22 | 1.19756  | YES | YES |

**[PhSe(PPh3).PtBu3]+\_iso1**

bp86-d3\_def2-tzvpp energy (au): -4485.2910762470

Zero point energy (au): 0.7160289

Entropy (kJ mol<sup>-1</sup>): 1.08484

Chemical potential (kJ mol<sup>-1</sup>): 1674.97

XYZ coordinates:

86

|    |          |          |          |
|----|----------|----------|----------|
| P  | -2.04946 | 0.38089  | 0.01359  |
| Se | 0.52874  | 0.22577  | 0.02473  |
| C  | 0.28095  | -1.70495 | 0.03151  |
| C  | -0.08681 | -2.34336 | -1.16081 |
| H  | -0.18443 | -1.76852 | -2.08060 |
| C  | -0.35077 | -3.71496 | -1.15998 |
| H  | -0.64287 | -4.20638 | -2.08768 |
| C  | -0.23859 | -4.45152 | 0.02322  |
| H  | -0.43874 | -5.52260 | 0.01988  |
| C  | 0.12052  | -3.81011 | 1.21092  |
| H  | 0.19220  | -4.37515 | 2.13993  |
| C  | 0.36858  | -2.43465 | 1.22128  |
| H  | 0.61063  | -1.93505 | 2.15564  |
| C  | -2.94927 | -0.53670 | 1.28980  |
| C  | -2.93898 | -1.94383 | 1.23399  |
| H  | -2.44799 | -2.45719 | 0.40703  |
| C  | -3.56631 | -2.68514 | 2.23329  |
| H  | -3.56032 | -3.77354 | 2.17859  |
| C  | -4.19593 | -2.03676 | 3.30085  |
| H  | -4.68304 | -2.61945 | 4.08229  |
| C  | -4.20319 | -0.64087 | 3.36231  |
| H  | -4.69975 | -0.13208 | 4.18823  |
| C  | -3.58380 | 0.11132  | 2.36221  |
| H  | -3.60280 | 1.19970  | 2.41144  |
| C  | -2.34755 | 2.15296  | 0.25946  |
| C  | -3.24515 | 2.87628  | -0.54159 |
| H  | -3.80258 | 2.37058  | -1.32972 |
| C  | -3.42103 | 4.24463  | -0.32829 |
| H  | -4.11961 | 4.80190  | -0.95194 |
| C  | -2.70879 | 4.89716  | 0.68195  |
| H  | -2.85081 | 5.96514  | 0.84551  |
| C  | -1.81349 | 4.18095  | 1.48230  |
| H  | -1.25846 | 4.68796  | 2.27132  |
| C  | -1.62577 | 2.81499  | 1.26994  |
| H  | -0.92386 | 2.25766  | 1.89215  |
| C  | -2.74900 | -0.06760 | -1.59963 |
| C  | -3.95937 | -0.76485 | -1.73529 |
| H  | -4.52744 | -1.05230 | -0.85131 |
| C  | -4.43760 | -1.08796 | -3.00725 |
| H  | -5.37821 | -1.62918 | -3.10698 |
| C  | -3.71966 | -0.71402 | -4.14595 |
| H  | -4.09729 | -0.96779 | -5.13613 |
| C  | -2.51607 | -0.01273 | -4.01505 |
| H  | -1.95565 | 0.28273  | -4.90182 |
| C  | -2.02761 | 0.30448  | -2.74848 |



|   |          |          |          |
|---|----------|----------|----------|
| H | -1.08209 | 0.83897  | -2.64441 |
| P | 3.11869  | 0.28238  | 0.01660  |
| C | 3.44346  | 1.87936  | -1.00737 |
| C | 4.84009  | 2.48362  | -0.76798 |
| H | 4.96918  | 3.33839  | -1.44939 |
| C | 2.37047  | 2.94652  | -0.68277 |
| H | 2.59015  | 3.83597  | -1.29195 |
| H | 2.35981  | 3.26459  | 0.36152  |
| H | 1.36095  | 2.61376  | -0.95609 |
| C | 3.67057  | 0.54998  | 1.83787  |
| C | 5.19188  | 0.43155  | 2.04616  |
| H | 5.41756  | 0.66510  | 3.09779  |
| H | 5.76083  | 1.13159  | 1.42522  |
| H | 5.56338  | -0.58117 | 1.85585  |
| H | 3.14254  | -1.51844 | 2.46429  |
| H | 1.85878  | -0.31139 | 2.70690  |
| H | 3.27935  | -0.33060 | 3.76751  |
| C | 3.20222  | 1.93552  | 2.32674  |
| H | 2.12444  | 2.08057  | 2.17465  |
| H | 3.74513  | 2.76356  | 1.86024  |
| H | 3.39127  | 1.99319  | 3.40890  |
| C | 4.04256  | -1.21445 | -0.76083 |
| C | 4.00474  | -2.39663 | 0.22910  |
| H | 4.42911  | -3.27494 | -0.27913 |
| H | 2.97971  | -2.65341 | 0.52498  |
| H | 4.60621  | -2.22401 | 1.12742  |
| C | 5.50550  | -0.91071 | -1.13458 |
| H | 6.10576  | -0.57412 | -0.28330 |
| H | 5.58564  | -0.16514 | -1.93330 |
| H | 5.96190  | -1.83806 | -1.51347 |
| C | 3.28507  | -1.67679 | -2.02415 |
| H | 3.31406  | -0.95335 | -2.84141 |
| H | 2.24041  | -1.91841 | -1.80573 |
| H | 3.76659  | -2.59733 | -2.38652 |
| H | 4.96250  | 2.86494  | 0.25148  |
| H | 5.65100  | 1.77691  | -0.97155 |
| C | 3.28364  | 1.55718  | -2.50659 |
| H | 3.30675  | 2.50576  | -3.06296 |
| H | 4.09523  | 0.93521  | -2.89762 |
| H | 2.32281  | 1.07069  | -2.72039 |
| C | 2.94277  | -0.47782 | 2.73052  |

Vibrational Spectrum (first 50 lines):

| #  | mode | symmetry | wave number | IR intensity | selection rules |
|----|------|----------|-------------|--------------|-----------------|
| #  |      | cm**(-1) | km/mol      | IR           | RAMAN           |
| 1  |      | 0.00     | 0.00000     | -            | -               |
| 2  |      | 0.00     | 0.00000     | -            | -               |
| 3  |      | 0.00     | 0.00000     | -            | -               |
| 4  |      | 0.00     | 0.00000     | -            | -               |
| 5  |      | 0.00     | 0.00000     | -            | -               |
| 6  |      | 0.00     | 0.00000     | -            | -               |
| 7  | a    | 11.71    | 0.20916     | YES          | YES             |
| 8  | a    | 16.11    | 0.03764     | YES          | YES             |
| 9  | a    | 23.26    | 0.16084     | YES          | YES             |
| 10 | a    | 24.96    | 0.00448     | YES          | YES             |
| 11 | a    | 39.13    | 3.36636     | YES          | YES             |

|    |   |        |          |     |     |
|----|---|--------|----------|-----|-----|
| 12 | a | 43.53  | 1.03435  | YES | YES |
| 13 | a | 48.91  | 0.17615  | YES | YES |
| 14 | a | 51.58  | 0.76720  | YES | YES |
| 15 | a | 56.42  | 4.28632  | YES | YES |
| 16 | a | 58.80  | 16.21078 | YES | YES |
| 17 | a | 62.46  | 14.22494 | YES | YES |
| 18 | a | 74.23  | 35.63279 | YES | YES |
| 19 | a | 76.24  | 9.28973  | YES | YES |
| 20 | a | 82.54  | 5.55539  | YES | YES |
| 21 | a | 96.51  | 5.46165  | YES | YES |
| 22 | a | 97.55  | 3.91164  | YES | YES |
| 23 | a | 101.58 | 0.84170  | YES | YES |
| 24 | a | 109.26 | 16.54026 | YES | YES |
| 25 | a | 119.85 | 0.37742  | YES | YES |
| 26 | a | 127.19 | 0.72038  | YES | YES |
| 27 | a | 128.82 | 0.18074  | YES | YES |
| 28 | a | 168.78 | 0.09354  | YES | YES |
| 29 | a | 183.58 | 1.26053  | YES | YES |
| 30 | a | 190.06 | 0.28902  | YES | YES |
| 31 | a | 194.52 | 1.51952  | YES | YES |
| 32 | a | 196.40 | 1.81385  | YES | YES |
| 33 | a | 197.28 | 0.40334  | YES | YES |
| 34 | a | 203.10 | 0.73076  | YES | YES |
| 35 | a | 205.85 | 1.12837  | YES | YES |
| 36 | a | 211.05 | 0.35232  | YES | YES |
| 37 | a | 220.50 | 16.00348 | YES | YES |
| 38 | a | 228.31 | 0.18541  | YES | YES |
| 39 | a | 234.98 | 4.13688  | YES | YES |
| 40 | a | 237.70 | 0.72903  | YES | YES |
| 41 | a | 240.94 | 0.35787  | YES | YES |
| 42 | a | 252.50 | 0.13170  | YES | YES |
| 43 | a | 254.11 | 0.85523  | YES | YES |
| 44 | a | 254.48 | 0.52175  | YES | YES |
| 45 | a | 257.59 | 0.40446  | YES | YES |
| 46 | a | 263.81 | 0.63111  | YES | YES |
| 47 | a | 272.42 | 0.54556  | YES | YES |
| 48 | a | 276.58 | 0.04577  | YES | YES |
| 49 | a | 279.32 | 0.03455  | YES | YES |
| 50 | a | 289.48 | 1.19756  | YES | YES |

**[PhSe(PtBu3)]+**

bp86-d3\_def2-tzvp energy (au): -3448.5928732650

Zero point energy (au): 0.4487617

Entropy (kJ mol<sup>-1</sup>): 0.69574

Chemical potential (kJ mol<sup>-1</sup>): 1041.12

XYZ coordinates:

52

|   |          |          |          |
|---|----------|----------|----------|
| P | 1.12513  | 0.09488  | -0.10856 |
| C | -4.80324 | 0.53486  | -0.45117 |
| H | -5.79758 | 0.85761  | -0.75755 |
| C | 1.65803  | 1.55709  | 1.01884  |
| C | -2.77309 | 0.92076  | 0.81646  |
| H | -2.20393 | 1.53155  | 1.51165  |
| C | 2.34203  | 1.01309  | 2.28862  |
| H | 2.51214  | 1.86522  | 2.96214  |
| H | 3.31761  | 0.55757  | 2.09397  |
| H | 1.70581  | 0.29854  | 2.82660  |
| C | -4.04568 | 1.33125  | 0.41210  |
| H | -4.44938 | 2.27108  | 0.78754  |
| C | 2.15414  | -2.27260 | -1.30216 |
| H | 2.87959  | -3.09565 | -1.23063 |
| H | 2.25492  | -1.84214 | -2.30338 |
| H | 1.15318  | -2.70699 | -1.19047 |
| C | -2.25401 | -0.28318 | 0.32777  |
| C | 2.48075  | -1.27059 | -0.17774 |
| C | -3.01579 | -1.09761 | -0.52110 |
| H | -2.62040 | -2.05005 | -0.87207 |
| C | -0.26956 | 1.95385  | -1.74658 |
| H | -0.60676 | 2.20798  | -2.76177 |
| H | 0.27727  | 2.82151  | -1.36434 |
| H | -1.16592 | 1.79030  | -1.13761 |
| C | 3.86996  | -0.65168 | -0.43155 |
| H | 4.58545  | -1.47933 | -0.54260 |
| H | 4.21895  | -0.03716 | 0.40470  |
| H | 3.91757  | -0.05718 | -1.34898 |
| C | -0.23810 | -0.38744 | -2.57393 |
| H | -1.18733 | -0.57078 | -2.06480 |
| H | 0.28013  | -1.33812 | -2.70950 |
| H | -0.47461 | 0.00233  | -3.57462 |
| C | 0.41395  | 2.33279  | 1.49459  |
| H | 0.76530  | 3.18814  | 2.08903  |
| H | -0.20733 | 1.71155  | 2.15021  |
| H | -0.20491 | 2.72730  | 0.68541  |
| C | 2.61849  | 2.51476  | 0.28574  |
| H | 2.13172  | 3.05250  | -0.53440 |
| H | 3.51396  | 2.01759  | -0.10133 |
| H | 2.95397  | 3.26959  | 1.01127  |
| C | 0.60320  | 0.68766  | -1.85787 |
| C | 2.51358  | -2.07625 | 1.14115  |
| H | 1.58689  | -2.63950 | 1.30708  |
| H | 2.72672  | -1.47580 | 2.02720  |
| H | 3.32076  | -2.81717 | 1.04651  |

|    |          |          |          |
|----|----------|----------|----------|
| C  | 1.85226  | 1.00023  | -2.70758 |
| H  | 1.50058  | 1.41466  | -3.66353 |
| H  | 2.43592  | 0.10417  | -2.94285 |
| H  | 2.51427  | 1.74508  | -2.25579 |
| C  | -4.29283 | -0.68314 | -0.90676 |
| H  | -4.88729 | -1.31796 | -1.56308 |
| Se | -0.56261 | -1.01176 | 0.95834  |

Vibrational Spectrum (first 50 lines):

| #  | mode | symmetry | wave number | IR intensity | selection rules |
|----|------|----------|-------------|--------------|-----------------|
| #  |      | cm**(-1) | km/mol      | IR           | RAMAN           |
| 1  |      | 0.00     | 0.00000     | -            | -               |
| 2  |      | 0.00     | 0.00000     | -            | -               |
| 3  |      | 0.00     | 0.00000     | -            | -               |
| 4  |      | 0.00     | 0.00000     | -            | -               |
| 5  |      | 0.00     | 0.00000     | -            | -               |
| 6  |      | 0.00     | 0.00000     | -            | -               |
| 7  | a    | 27.31    | 0.16901     | YES          | YES             |
| 8  | a    | 54.54    | 0.24576     | YES          | YES             |
| 9  | a    | 69.56    | 0.24631     | YES          | YES             |
| 10 | a    | 83.62    | 0.08479     | YES          | YES             |
| 11 | a    | 95.42    | 0.37731     | YES          | YES             |
| 12 | a    | 113.72   | 0.23995     | YES          | YES             |
| 13 | a    | 126.21   | 0.24456     | YES          | YES             |
| 14 | a    | 129.02   | 0.06744     | YES          | YES             |
| 15 | a    | 157.62   | 0.43018     | YES          | YES             |
| 16 | a    | 164.97   | 0.09569     | YES          | YES             |
| 17 | a    | 191.63   | 0.29988     | YES          | YES             |
| 18 | a    | 196.23   | 1.11102     | YES          | YES             |
| 19 | a    | 197.44   | 0.88169     | YES          | YES             |
| 20 | a    | 205.90   | 0.57519     | YES          | YES             |
| 21 | a    | 207.91   | 0.23675     | YES          | YES             |
| 22 | a    | 218.45   | 0.16223     | YES          | YES             |
| 23 | a    | 223.04   | 0.46479     | YES          | YES             |
| 24 | a    | 228.25   | 0.32132     | YES          | YES             |
| 25 | a    | 233.33   | 0.27486     | YES          | YES             |
| 26 | a    | 253.66   | 0.46381     | YES          | YES             |
| 27 | a    | 255.88   | 0.02371     | YES          | YES             |
| 28 | a    | 260.61   | 0.10954     | YES          | YES             |
| 29 | a    | 274.27   | 0.35780     | YES          | YES             |
| 30 | a    | 279.59   | 0.10275     | YES          | YES             |
| 31 | a    | 281.49   | 0.05672     | YES          | YES             |
| 32 | a    | 286.29   | 0.09256     | YES          | YES             |
| 33 | a    | 299.65   | 1.39295     | YES          | YES             |
| 34 | a    | 321.13   | 0.29371     | YES          | YES             |
| 35 | a    | 336.15   | 0.35438     | YES          | YES             |
| 36 | a    | 343.89   | 0.53795     | YES          | YES             |
| 37 | a    | 363.39   | 0.97683     | YES          | YES             |
| 38 | a    | 372.26   | 0.18191     | YES          | YES             |
| 39 | a    | 376.33   | 0.25871     | YES          | YES             |
| 40 | a    | 398.84   | 0.51073     | YES          | YES             |
| 41 | a    | 401.44   | 0.28197     | YES          | YES             |
| 42 | a    | 402.82   | 0.66514     | YES          | YES             |
| 43 | a    | 407.59   | 1.00864     | YES          | YES             |
| 44 | a    | 453.80   | 10.37741    | YES          | YES             |
| 45 | a    | 455.37   | 8.61739     | YES          | YES             |

|    |   |        |          |     |     |
|----|---|--------|----------|-----|-----|
| 46 | a | 468.11 | 5.97040  | YES | YES |
| 47 | a | 491.57 | 27.26655 | YES | YES |
| 48 | a | 532.56 | 18.56318 | YES | YES |
| 49 | a | 565.85 | 6.04265  | YES | YES |
| 50 | a | 571.69 | 2.31465  | YES | YES |

**[PhS(PPh3)]+**

bp86-d3\_def2-tzvpp energy (au): -1666.4966123460

Zero point energy (au): 0.3581723

Entropy (kJ mol<sup>-1</sup>): 0.69606

Chemical potential (kJ mol<sup>-1</sup>): 795.94

XYZ coordinates:

46

|   |          |          |          |
|---|----------|----------|----------|
| P | 0.23717  | 0.57326  | 0.04585  |
| S | 2.08180  | -0.42862 | 0.17019  |
| C | 1.49991  | -2.11993 | 0.04588  |
| C | 1.22258  | -2.67887 | -1.20938 |
| H | 1.36719  | -2.09151 | -2.11454 |
| C | 0.75282  | -3.99127 | -1.28169 |
| H | 0.53333  | -4.43175 | -2.25370 |
| C | 0.57560  | -4.73989 | -0.11341 |
| H | 0.21494  | -5.76609 | -0.17642 |
| C | 0.87015  | -4.18028 | 1.13301  |
| H | 0.73951  | -4.76587 | 2.04234  |
| C | 1.32845  | -2.86467 | 1.22016  |
| H | 1.54243  | -2.41325 | 2.18767  |
| C | -0.96405 | -0.14677 | 1.17463  |
| C | -1.54800 | -1.38925 | 0.85998  |
| H | -1.30742 | -1.89364 | -0.07557 |
| C | -2.44039 | -1.97471 | 1.75543  |
| H | -2.89276 | -2.93520 | 1.51202  |
| C | -2.75174 | -1.33300 | 2.95794  |
| H | -3.45254 | -1.79401 | 3.65342  |
| C | -2.17289 | -0.09929 | 3.26931  |
| H | -2.42317 | 0.40370  | 4.20261  |
| C | -1.27663 | 0.49782  | 2.38342  |
| H | -0.83472 | 1.46348  | 2.62601  |
| C | 0.62552  | 2.27425  | 0.48866  |
| C | 0.08819  | 3.32726  | -0.27078 |
| H | -0.53180 | 3.11922  | -1.14211 |
| C | 0.36048  | 4.64548  | 0.09534  |
| H | -0.05280 | 5.46378  | -0.49296 |
| C | 1.16404  | 4.91429  | 1.20685  |
| H | 1.37629  | 5.94594  | 1.48588  |
| C | 1.70238  | 3.86555  | 1.95956  |
| H | 2.33324  | 4.07694  | 2.82200  |
| C | 1.43741  | 2.54323  | 1.60657  |
| H | 1.86081  | 1.72691  | 2.19178  |
| C | -0.41504 | 0.50959  | -1.63366 |
| C | -1.80330 | 0.49360  | -1.85202 |
| H | -2.49496 | 0.45658  | -1.01143 |
| C | -2.29384 | 0.52700  | -3.15825 |
| H | -3.36951 | 0.51090  | -3.32986 |
| C | -1.40960 | 0.57944  | -4.23902 |
| H | -1.79768 | 0.60118  | -5.25695 |
| C | -0.02791 | 0.60424  | -4.02005 |
| H | 0.65984  | 0.64805  | -4.86366 |
| C | 0.47416  | 0.57045  | -2.72042 |

H 1.55030 0.58518 -2.54724

Vibrational Spectrum (first 50 lines):

| #  | mode | symmetry | wave number | IR intensity | selection rules |
|----|------|----------|-------------|--------------|-----------------|
| #  |      | cm**(-1) | km/mol      | IR           | RAMAN           |
| 1  |      | 0.00     | 0.00000     | -            | -               |
| 2  |      | 0.00     | 0.00000     | -            | -               |
| 3  |      | 0.00     | 0.00000     | -            | -               |
| 4  |      | 0.00     | 0.00000     | -            | -               |
| 5  |      | 0.00     | 0.00000     | -            | -               |
| 6  |      | 0.00     | 0.00000     | -            | -               |
| 7  | a    | 16.62    | 0.05952     | YES          | YES             |
| 8  | a    | 28.72    | 0.01867     | YES          | YES             |
| 9  | a    | 40.43    | 0.10157     | YES          | YES             |
| 10 | a    | 43.85    | 0.06002     | YES          | YES             |
| 11 | a    | 48.58    | 0.11053     | YES          | YES             |
| 12 | a    | 55.67    | 0.08976     | YES          | YES             |
| 13 | a    | 61.50    | 0.07185     | YES          | YES             |
| 14 | a    | 69.35    | 0.14880     | YES          | YES             |
| 15 | a    | 83.94    | 0.12844     | YES          | YES             |
| 16 | a    | 102.14   | 0.36043     | YES          | YES             |
| 17 | a    | 115.84   | 0.64628     | YES          | YES             |
| 18 | a    | 184.06   | 1.39555     | YES          | YES             |
| 19 | a    | 199.04   | 1.30274     | YES          | YES             |
| 20 | a    | 212.31   | 1.60002     | YES          | YES             |
| 21 | a    | 218.06   | 0.02338     | YES          | YES             |
| 22 | a    | 241.06   | 0.79453     | YES          | YES             |
| 23 | a    | 256.34   | 0.40448     | YES          | YES             |
| 24 | a    | 265.01   | 0.54651     | YES          | YES             |
| 25 | a    | 284.86   | 1.49269     | YES          | YES             |
| 26 | a    | 318.49   | 2.78963     | YES          | YES             |
| 27 | a    | 387.93   | 0.11600     | YES          | YES             |
| 28 | a    | 389.00   | 0.03359     | YES          | YES             |
| 29 | a    | 396.39   | 0.63569     | YES          | YES             |
| 30 | a    | 397.99   | 0.14853     | YES          | YES             |
| 31 | a    | 404.20   | 3.55272     | YES          | YES             |
| 32 | a    | 435.16   | 7.02832     | YES          | YES             |
| 33 | a    | 439.40   | 4.42208     | YES          | YES             |
| 34 | a    | 447.92   | 5.20153     | YES          | YES             |
| 35 | a    | 478.43   | 15.23696    | YES          | YES             |
| 36 | a    | 495.90   | 56.73522    | YES          | YES             |
| 37 | a    | 513.16   | 80.57710    | YES          | YES             |
| 38 | a    | 551.90   | 66.93492    | YES          | YES             |
| 39 | a    | 606.25   | 0.01315     | YES          | YES             |
| 40 | a    | 606.71   | 0.50934     | YES          | YES             |
| 41 | a    | 608.09   | 0.09553     | YES          | YES             |
| 42 | a    | 609.23   | 0.60964     | YES          | YES             |
| 43 | a    | 680.47   | 5.62657     | YES          | YES             |
| 44 | a    | 683.87   | 20.90405    | YES          | YES             |
| 45 | a    | 686.92   | 43.44317    | YES          | YES             |
| 46 | a    | 687.98   | 10.10750    | YES          | YES             |
| 47 | a    | 688.69   | 23.35973    | YES          | YES             |
| 48 | a    | 691.43   | 9.88646     | YES          | YES             |
| 49 | a    | 714.72   | 31.71987    | YES          | YES             |
| 50 | a    | 715.75   | 33.06996    | YES          | YES             |

**[PhS(PPh3).PPh3]+**

bp86-d3\_def2-tzvpp energy (au): -2703.1871371190

Zero point energy (au): 0.6250430

Entropy (kJ mol<sup>-1</sup>): 1.09116

Chemical potential (kJ mol<sup>-1</sup>): 1427.48

XYZ coordinates:

80

|   |          |          |          |
|---|----------|----------|----------|
| C | -4.70934 | 0.58915  | 3.66711  |
| H | -5.75600 | 0.72017  | 3.94099  |
| C | 2.80911  | 2.42290  | 3.74504  |
| H | 3.88523  | 2.46321  | 3.57675  |
| S | -0.33964 | 0.07293  | -0.20171 |
| P | -0.28338 | 0.09064  | 2.45720  |
| C | 0.81143  | 3.30617  | 4.78727  |
| H | 0.32671  | 4.03528  | 5.43634  |
| C | -4.15204 | 1.36488  | 2.64625  |
| H | -4.76219 | 2.10066  | 2.12268  |
| C | -2.01843 | 0.25076  | 2.96780  |
| C | 2.05193  | 1.42987  | 3.12622  |
| H | 2.54069  | 0.70220  | 2.47749  |
| C | 1.13280  | -4.09206 | 3.81659  |
| H | 1.46375  | -5.08748 | 4.11179  |
| C | 0.66256  | 1.36023  | 3.34650  |
| C | 3.50208  | 1.42452  | -0.26400 |
| H | 4.01458  | 2.37077  | -0.43455 |
| C | -2.81361 | 1.19236  | 2.29092  |
| H | -2.37966 | 1.79130  | 1.48865  |
| C | 0.28349  | -1.52865 | 3.05936  |
| C | 0.21335  | -3.94058 | 2.77253  |
| H | -0.17482 | -4.81723 | 2.25401  |
| C | 0.04640  | 2.30816  | 4.17940  |
| H | -1.02777 | 2.26227  | 4.35760  |
| C | 2.19079  | 3.36554  | 4.57351  |
| H | 2.78425  | 4.14395  | 5.05247  |
| C | -2.58381 | -0.52699 | 3.99105  |
| H | -1.97399 | -1.26254 | 4.51550  |
| C | 1.20074  | -1.68685 | 4.10895  |
| H | 1.58190  | -0.81363 | 4.63734  |
| C | -0.20405 | -2.66682 | 2.39018  |
| H | -0.91201 | -2.54830 | 1.56826  |
| C | 2.17933  | -1.00291 | 0.18226  |
| H | 1.65788  | -1.94363 | 0.34949  |
| C | -3.92577 | -0.35660 | 4.33533  |
| H | -4.35971 | -0.96113 | 5.13162  |
| C | 1.62334  | -2.96561 | 4.48121  |
| H | 2.33389  | -3.08032 | 5.29968  |
| C | 3.57069  | -0.93797 | 0.26744  |
| H | 4.13701  | -1.83770 | 0.50567  |
| C | 2.10796  | 1.37362  | -0.33059 |
| H | 1.53259  | 2.27194  | -0.54636 |
| C | 4.23351  | 0.27194  | 0.03755  |
| H | 5.32059  | 0.31735  | 0.09784  |



|   |          |          |          |
|---|----------|----------|----------|
| C | 1.44835  | 0.15635  | -0.11395 |
| C | -4.72081 | -1.01743 | -3.42873 |
| H | -5.75953 | -1.25596 | -3.65589 |
| C | 2.98431  | -2.11851 | -3.56536 |
| H | 4.06323  | -1.97244 | -3.52469 |
| P | -0.33465 | -0.02637 | -2.45254 |
| C | 1.06842  | -3.48489 | -4.13916 |
| H | 0.65194  | -4.40284 | -4.55278 |
| C | -4.05806 | -1.69678 | -2.40224 |
| H | -4.57733 | -2.46353 | -1.82819 |
| C | -2.05752 | -0.40211 | -2.84632 |
| C | 2.13812  | -1.11940 | -3.08957 |
| H | 2.55955  | -0.20298 | -2.67669 |
| C | 0.64211  | 4.07211  | -4.30768 |
| H | 0.86262  | 5.04846  | -4.73838 |
| C | 0.74215  | -1.29979 | -3.14436 |
| C | -2.72965 | -1.39175 | -2.10575 |
| H | -2.21453 | -1.91958 | -1.30300 |
| C | 0.08506  | 1.56683  | -3.19896 |
| C | -0.11189 | 3.98158  | -3.13252 |
| H | -0.48081 | 4.88492  | -2.64764 |
| C | 0.21026  | -2.48889 | -3.67062 |
| H | -0.86838 | -2.63220 | -3.72446 |
| C | 2.45274  | -3.30253 | -4.08703 |
| H | 3.11873  | -4.08195 | -4.45630 |
| C | -2.72630 | 0.28076  | -3.87517 |
| H | -2.21098 | 1.05325  | -4.44529 |
| C | 0.83402  | 1.65873  | -4.38294 |
| H | 1.19613  | 0.75743  | -4.87579 |
| C | -0.38888 | 2.73461  | -2.57517 |
| H | -0.96558 | 2.66161  | -1.65253 |
| C | -4.05563 | -0.03089 | -4.16240 |
| H | -4.57293 | 0.49937  | -4.96133 |
| C | 1.11181  | 2.91292  | -4.93034 |
| H | 1.69441  | 2.98217  | -5.84850 |

Vibrational Spectrum (first 50 lines):

| #  | mode | symmetry | wave number | IR intensity | selection rules |
|----|------|----------|-------------|--------------|-----------------|
| #  |      | cm**(-1) | km/mol      | IR           | RAMAN           |
| 1  |      | 0.00     | 0.00000     | -            | -               |
| 2  |      | 0.00     | 0.00000     | -            | -               |
| 3  |      | 0.00     | 0.00000     | -            | -               |
| 4  |      | 0.00     | 0.00000     | -            | -               |
| 5  |      | 0.00     | 0.00000     | -            | -               |
| 6  |      | 0.00     | 0.00000     | -            | -               |
| 7  | a    | 10.94    | 0.18803     | YES          | YES             |
| 8  | a    | 11.83    | 1.52879     | YES          | YES             |
| 9  | a    | 18.13    | 3.50095     | YES          | YES             |
| 10 | a    | 24.39    | 0.59173     | YES          | YES             |
| 11 | a    | 28.08    | 0.33366     | YES          | YES             |
| 12 | a    | 30.27    | 2.68462     | YES          | YES             |
| 13 | a    | 31.78    | 8.04655     | YES          | YES             |
| 14 | a    | 40.35    | 0.09653     | YES          | YES             |
| 15 | a    | 45.02    | 0.65380     | YES          | YES             |
| 16 | a    | 48.10    | 0.06645     | YES          | YES             |
| 17 | a    | 50.01    | 0.65391     | YES          | YES             |

|    |   |        |          |     |     |
|----|---|--------|----------|-----|-----|
| 18 | a | 51.02  | 0.41816  | YES | YES |
| 19 | a | 53.69  | 0.42384  | YES | YES |
| 20 | a | 58.41  | 1.90242  | YES | YES |
| 21 | a | 59.69  | 0.58092  | YES | YES |
| 22 | a | 65.92  | 25.46259 | YES | YES |
| 23 | a | 73.40  | 0.75903  | YES | YES |
| 24 | a | 76.09  | 10.18533 | YES | YES |
| 25 | a | 81.88  | 29.02501 | YES | YES |
| 26 | a | 88.65  | 40.75452 | YES | YES |
| 27 | a | 96.50  | 3.08106  | YES | YES |
| 28 | a | 120.84 | 0.73067  | YES | YES |
| 29 | a | 142.59 | 3.98847  | YES | YES |
| 30 | a | 156.43 | 91.30610 | YES | YES |
| 31 | a | 181.18 | 3.89546  | YES | YES |
| 32 | a | 186.97 | 0.68352  | YES | YES |
| 33 | a | 192.10 | 1.47058  | YES | YES |
| 34 | a | 196.95 | 1.31987  | YES | YES |
| 35 | a | 205.66 | 2.50685  | YES | YES |
| 36 | a | 212.16 | 3.85236  | YES | YES |
| 37 | a | 236.58 | 22.03871 | YES | YES |
| 38 | a | 239.26 | 10.01616 | YES | YES |
| 39 | a | 240.38 | 30.46198 | YES | YES |
| 40 | a | 253.06 | 2.38470  | YES | YES |
| 41 | a | 256.38 | 6.55629  | YES | YES |
| 42 | a | 262.36 | 0.59631  | YES | YES |
| 43 | a | 265.86 | 1.28603  | YES | YES |
| 44 | a | 301.57 | 9.76260  | YES | YES |
| 45 | a | 386.74 | 0.59295  | YES | YES |
| 46 | a | 389.22 | 0.16321  | YES | YES |
| 47 | a | 389.40 | 0.52405  | YES | YES |
| 48 | a | 390.24 | 0.22134  | YES | YES |
| 49 | a | 391.11 | 0.36851  | YES | YES |
| 50 | a | 397.14 | 0.69547  | YES | YES |

**[PhS(PtBu<sub>3</sub>).PPh<sub>3</sub>]<sup>+</sup>**

bp86-d3\_def2-tzvpp energy (au): -2481.6919528460

Zero point energy (au): 0.7171672

Entropy (kJ mol<sup>-1</sup>): 1.06784

Chemical potential (kJ mol<sup>-1</sup>): 1681.61

XYZ coordinates:

86

|   |          |          |          |
|---|----------|----------|----------|
| P | -2.00156 | 0.18128  | 0.55231  |
| S | 0.99101  | -0.04459 | 0.51344  |
| C | 0.62923  | -1.78214 | 0.22511  |
| C | 0.32023  | -2.26572 | -1.05174 |
| H | 0.36302  | -1.61226 | -1.91933 |
| C | -0.10359 | -3.58796 | -1.20460 |
| H | -0.35079 | -3.95507 | -2.19995 |
| C | -0.23764 | -4.42007 | -0.09176 |
| H | -0.57441 | -5.44871 | -0.21632 |
| C | 0.03912  | -3.92397 | 1.18670  |
| H | -0.08933 | -4.55897 | 2.06273  |
| C | 0.46555  | -2.60638 | 1.34819  |
| H | 0.64230  | -2.20406 | 2.34488  |
| C | -3.50338 | -0.64762 | 1.18671  |
| C | -3.41377 | -2.03206 | 1.41931  |
| H | -2.47321 | -2.55291 | 1.22825  |
| C | -4.52054 | -2.74051 | 1.88994  |
| H | -4.44565 | -3.81480 | 2.05896  |
| C | -5.71749 | -2.06982 | 2.15734  |
| H | -6.57877 | -2.62006 | 2.53558  |
| C | -5.80594 | -0.69065 | 1.94724  |
| H | -6.73663 | -0.16480 | 2.16054  |
| C | -4.70672 | 0.02005  | 1.46042  |
| H | -4.78489 | 1.09483  | 1.29636  |
| C | -2.27222 | 1.97264  | 0.80264  |
| C | -3.02024 | 2.78498  | -0.06626 |
| H | -3.48015 | 2.34920  | -0.95341 |
| C | -3.17268 | 4.14689  | 0.20039  |
| H | -3.75684 | 4.76870  | -0.47817 |
| C | -2.58565 | 4.71159  | 1.33736  |
| H | -2.70931 | 5.77462  | 1.54360  |
| C | -1.84320 | 3.91098  | 2.20972  |
| H | -1.38845 | 4.34654  | 3.09952  |
| C | -1.68296 | 2.55017  | 1.94010  |
| H | -1.10220 | 1.92305  | 2.61951  |
| C | -2.09311 | -0.03825 | -1.26485 |
| C | -2.77120 | -1.11798 | -1.85270 |
| H | -3.39737 | -1.76543 | -1.23924 |
| C | -2.64746 | -1.37470 | -3.22016 |
| H | -3.18512 | -2.21512 | -3.65957 |
| C | -1.84931 | -0.55734 | -4.02456 |
| H | -1.75849 | -0.75685 | -5.09200 |
| C | -1.18430 | 0.53236  | -3.45258 |
| H | -0.57613 | 1.18967  | -4.07476 |
| C | -1.29961 | 0.78599  | -2.08568 |

|   |          |          |          |
|---|----------|----------|----------|
| H | -0.77746 | 1.63842  | -1.64955 |
| P | 3.05819  | 0.32652  | 0.05887  |
| C | 3.49760  | -0.10440 | -1.76026 |
| C | 4.76941  | 0.62494  | -2.23828 |
| H | 4.96908  | 0.29714  | -3.26927 |
| C | 2.32631  | 0.28089  | -2.69140 |
| H | 2.44427  | -0.27364 | -3.63248 |
| H | 2.32020  | 1.34473  | -2.94008 |
| H | 1.34418  | 0.03356  | -2.28015 |
| C | 3.03944  | 2.23150  | 0.33233  |
| C | 4.47202  | 2.77696  | 0.49647  |
| H | 4.40853  | 3.87408  | 0.53577  |
| H | 5.13123  | 2.51925  | -0.33880 |
| H | 4.94374  | 2.44897  | 1.42856  |
| H | 2.52805  | 2.12701  | 2.49911  |
| H | 1.13440  | 2.42334  | 1.43716  |
| H | 2.31997  | 3.69943  | 1.71929  |
| C | 2.37091  | 2.92325  | -0.87333 |
| H | 1.37830  | 2.51136  | -1.09031 |
| H | 2.98292  | 2.88539  | -1.77966 |
| H | 2.23932  | 3.98350  | -0.61504 |
| C | 4.21645  | -0.55510 | 1.30491  |
| C | 4.00650  | 0.05163  | 2.70613  |
| H | 4.57248  | -0.56139 | 3.42211  |
| H | 2.95207  | 0.02235  | 3.00853  |
| H | 4.37885  | 1.07708  | 2.79393  |
| C | 5.69880  | -0.43244 | 0.90138  |
| H | 6.03099  | 0.60224  | 0.77063  |
| H | 5.93009  | -0.99420 | -0.01013 |
| H | 6.30233  | -0.87025 | 1.70998  |
| C | 3.84057  | -2.04769 | 1.41313  |
| H | 3.87691  | -2.59143 | 0.46725  |
| H | 2.84628  | -2.18273 | 1.84556  |
| H | 4.56480  | -2.51938 | 2.09319  |
| H | 4.64496  | 1.71261  | -2.26736 |
| H | 5.65680  | 0.38831  | -1.64334 |
| C | 3.72469  | -1.62650 | -1.87415 |
| H | 3.87416  | -1.86123 | -2.93756 |
| H | 4.62236  | -1.95985 | -1.34353 |
| H | 2.86412  | -2.20909 | -1.52589 |
| C | 2.20474  | 2.61498  | 1.57764  |

Vibrational Spectrum (first 50 lines):

| #  | mode | symmetry | wave number | IR intensity | selection rules |
|----|------|----------|-------------|--------------|-----------------|
| #  |      | cm**(-1) | km/mol      | IR           | RAMAN           |
| 1  |      | 0.00     | 0.00000     | -            | -               |
| 2  |      | 0.00     | 0.00000     | -            | -               |
| 3  |      | 0.00     | 0.00000     | -            | -               |
| 4  |      | 0.00     | 0.00000     | -            | -               |
| 5  |      | 0.00     | 0.00000     | -            | -               |
| 6  |      | 0.00     | 0.00000     | -            | -               |
| 7  | a    | 9.18     | 0.01269     | YES          | YES             |
| 8  | a    | 21.12    | 0.10082     | YES          | YES             |
| 9  | a    | 23.17    | 0.04007     | YES          | YES             |
| 10 | a    | 31.22    | 1.50263     | YES          | YES             |
| 11 | a    | 40.60    | 1.39992     | YES          | YES             |

|    |   |        |          |     |     |
|----|---|--------|----------|-----|-----|
| 12 | a | 43.61  | 0.13349  | YES | YES |
| 13 | a | 48.45  | 0.08819  | YES | YES |
| 14 | a | 51.84  | 1.41971  | YES | YES |
| 15 | a | 54.79  | 0.32352  | YES | YES |
| 16 | a | 61.78  | 0.10756  | YES | YES |
| 17 | a | 65.45  | 1.16931  | YES | YES |
| 18 | a | 70.41  | 0.47360  | YES | YES |
| 19 | a | 81.08  | 2.61379  | YES | YES |
| 20 | a | 86.78  | 0.52125  | YES | YES |
| 21 | a | 93.16  | 4.79574  | YES | YES |
| 22 | a | 103.15 | 0.26072  | YES | YES |
| 23 | a | 113.93 | 0.77553  | YES | YES |
| 24 | a | 132.17 | 0.31853  | YES | YES |
| 25 | a | 136.08 | 0.36600  | YES | YES |
| 26 | a | 145.08 | 1.12803  | YES | YES |
| 27 | a | 151.67 | 2.93897  | YES | YES |
| 28 | a | 176.94 | 2.89140  | YES | YES |
| 29 | a | 181.96 | 2.77673  | YES | YES |
| 30 | a | 183.44 | 1.84336  | YES | YES |
| 31 | a | 191.15 | 3.74328  | YES | YES |
| 32 | a | 196.07 | 0.10355  | YES | YES |
| 33 | a | 204.93 | 0.81777  | YES | YES |
| 34 | a | 206.25 | 0.92553  | YES | YES |
| 35 | a | 211.44 | 0.68377  | YES | YES |
| 36 | a | 217.74 | 0.53559  | YES | YES |
| 37 | a | 226.85 | 0.40365  | YES | YES |
| 38 | a | 236.24 | 0.92258  | YES | YES |
| 39 | a | 237.98 | 3.59798  | YES | YES |
| 40 | a | 243.00 | 1.02436  | YES | YES |
| 41 | a | 244.68 | 3.02861  | YES | YES |
| 42 | a | 251.99 | 1.85758  | YES | YES |
| 43 | a | 258.31 | 0.02071  | YES | YES |
| 44 | a | 265.76 | 0.52491  | YES | YES |
| 45 | a | 268.69 | 4.01591  | YES | YES |
| 46 | a | 276.79 | 2.71600  | YES | YES |
| 47 | a | 280.33 | 5.66241  | YES | YES |
| 48 | a | 283.33 | 0.09378  | YES | YES |
| 49 | a | 291.90 | 2.39930  | YES | YES |
| 50 | a | 296.15 | 22.36439 | YES | YES |

**[PhS(PPh3).PtBu3]+\_try4**

bp86-d3\_def2-tzvpp energy (au): -2481.6911023530

Zero point energy (au): 0.7170464

Entropy (kJ mol<sup>-1</sup>): 1.07641

Chemical potential (kJ mol<sup>-1</sup>): 1678.56

XYZ coordinates:

86

|   |          |          |          |
|---|----------|----------|----------|
| P | -1.94140 | 0.39557  | 0.02507  |
| S | 0.26722  | 0.18006  | -0.04092 |
| C | 0.19825  | -1.60537 | -0.12682 |
| C | -0.05226 | -2.24123 | -1.34995 |
| H | -0.19306 | -1.64679 | -2.25119 |
| C | -0.11961 | -3.63528 | -1.40177 |
| H | -0.31562 | -4.13066 | -2.35227 |
| C | 0.07717  | -4.39143 | -0.24218 |
| H | 0.03437  | -5.47915 | -0.28826 |
| C | 0.33186  | -3.75315 | 0.97514  |
| H | 0.48355  | -4.34002 | 1.88049  |
| C | 0.38321  | -2.35983 | 1.03852  |
| H | 0.55915  | -1.85322 | 1.98613  |
| C | -2.77016 | -0.61988 | 1.26501  |
| C | -2.86549 | -2.00964 | 1.05579  |
| H | -2.48736 | -2.45540 | 0.13578  |
| C | -3.44444 | -2.81809 | 2.03126  |
| H | -3.51858 | -3.89202 | 1.86370  |
| C | -3.92187 | -2.25567 | 3.21965  |
| H | -4.37178 | -2.89248 | 3.98085  |
| C | -3.82596 | -0.87767 | 3.43030  |
| H | -4.20496 | -0.43666 | 4.35171  |
| C | -3.25219 | -0.05656 | 2.45858  |
| H | -3.19035 | 1.01847  | 2.62425  |
| C | -2.12408 | 2.14639  | 0.43334  |
| C | -3.01496 | 2.96370  | -0.28015 |
| H | -3.61422 | 2.54565  | -1.08858 |
| C | -3.12620 | 4.31611  | 0.04579  |
| H | -3.81848 | 4.94869  | -0.50881 |
| C | -2.35260 | 4.85676  | 1.07660  |
| H | -2.44113 | 5.91392  | 1.32547  |
| C | -1.46461 | 4.04482  | 1.78880  |
| H | -0.86114 | 4.46571  | 2.59241  |
| C | -1.34560 | 2.69216  | 1.47126  |
| H | -0.65175 | 2.06132  | 2.02714  |
| C | -2.70171 | 0.09662  | -1.58772 |
| C | -3.96919 | -0.49545 | -1.71005 |
| H | -4.51893 | -0.80579 | -0.82230 |
| C | -4.52561 | -0.68339 | -2.97678 |
| H | -5.50854 | -1.14415 | -3.06973 |
| C | -3.82855 | -0.27921 | -4.11822 |
| H | -4.26675 | -0.42898 | -5.10455 |
| C | -2.56920 | 0.31844  | -3.99731 |
| H | -2.02635 | 0.63618  | -4.88704 |
| C | -2.00268 | 0.50488  | -2.73775 |

|   |          |          |          |
|---|----------|----------|----------|
| H | -1.01639 | 0.96005  | -2.64159 |
| P | 3.05463  | 0.18411  | -0.03375 |
| C | 3.51560  | 1.29905  | -1.53822 |
| C | 4.83089  | 2.08444  | -1.38938 |
| H | 5.02774  | 2.62995  | -2.32590 |
| C | 2.36077  | 2.29597  | -1.79817 |
| H | 2.61707  | 2.89156  | -2.68742 |
| H | 2.18694  | 2.99729  | -0.97834 |
| H | 1.41881  | 1.77361  | -2.00584 |
| C | 3.35016  | 1.16598  | 1.59703  |
| C | 4.82344  | 1.30893  | 2.01966  |
| H | 4.87375  | 1.92252  | 2.93267  |
| H | 5.43368  | 1.80393  | 1.25651  |
| H | 5.28674  | 0.34457  | 2.25544  |
| H | 2.92409  | -0.53915 | 2.95781  |
| H | 1.49124  | 0.39745  | 2.48414  |
| H | 2.65809  | 1.06559  | 3.64446  |
| C | 2.73782  | 2.57613  | 1.46209  |
| H | 1.68810  | 2.54532  | 1.14091  |
| H | 3.29645  | 3.21878  | 0.77429  |
| H | 2.76557  | 3.05887  | 2.45082  |
| C | 4.17787  | -1.38809 | -0.04039 |
| C | 4.08717  | -2.09095 | 1.32906  |
| H | 4.60343  | -3.05947 | 1.24973  |
| H | 3.04856  | -2.29813 | 1.61483  |
| H | 4.57581  | -1.53167 | 2.13351  |
| C | 5.65980  | -1.12123 | -0.36055 |
| H | 6.12268  | -0.41535 | 0.33761  |
| H | 5.80783  | -0.74498 | -1.37864 |
| H | 6.21233  | -2.07070 | -0.28580 |
| C | 3.60106  | -2.38841 | -1.06777 |
| H | 3.63236  | -2.02680 | -2.09835 |
| H | 2.56616  | -2.65912 | -0.83091 |
| H | 4.20361  | -3.30844 | -1.02677 |
| H | 4.77963  | 2.83210  | -0.58926 |
| H | 5.69214  | 1.43662  | -1.19835 |
| C | 3.59397  | 0.41764  | -2.80132 |
| H | 3.68214  | 1.07614  | -3.67860 |
| H | 4.46582  | -0.24502 | -2.80948 |
| H | 2.68736  | -0.18915 | -2.93300 |
| C | 2.55950  | 0.46507  | 2.72714  |

Vibrational Spectrum (first 50 lines):

| #  | mode | symmetry | wave number | IR intensity | selection rules |
|----|------|----------|-------------|--------------|-----------------|
| #  |      |          | cm**(-1)    | km/mol       | IR RAMAN        |
| 1  |      |          | 0.00        | 0.00000      | - -             |
| 2  |      |          | 0.00        | 0.00000      | - -             |
| 3  |      |          | 0.00        | 0.00000      | - -             |
| 4  |      |          | 0.00        | 0.00000      | - -             |
| 5  |      |          | 0.00        | 0.00000      | - -             |
| 6  |      |          | 0.00        | 0.00000      | - -             |
| 7  | a    |          | 5.38        | 0.00731      | YES YES         |
| 8  | a    |          | 14.63       | 0.20132      | YES YES         |
| 9  | a    |          | 20.04       | 0.49924      | YES YES         |
| 10 | a    |          | 23.39       | 0.14959      | YES YES         |
| 11 | a    |          | 40.98       | 1.95006      | YES YES         |

|    |   |        |          |     |     |
|----|---|--------|----------|-----|-----|
| 12 | a | 45.18  | 0.93777  | YES | YES |
| 13 | a | 47.96  | 0.06684  | YES | YES |
| 14 | a | 51.30  | 0.18912  | YES | YES |
| 15 | a | 57.26  | 0.31576  | YES | YES |
| 16 | a | 64.38  | 1.12545  | YES | YES |
| 17 | a | 67.63  | 6.33880  | YES | YES |
| 18 | a | 71.38  | 22.65807 | YES | YES |
| 19 | a | 74.23  | 9.10143  | YES | YES |
| 20 | a | 82.64  | 1.63716  | YES | YES |
| 21 | a | 94.18  | 1.16981  | YES | YES |
| 22 | a | 105.58 | 2.37099  | YES | YES |
| 23 | a | 109.70 | 0.35558  | YES | YES |
| 24 | a | 117.38 | 0.07257  | YES | YES |
| 25 | a | 135.88 | 0.12179  | YES | YES |
| 26 | a | 147.78 | 1.85043  | YES | YES |
| 27 | a | 170.24 | 81.03072 | YES | YES |
| 28 | a | 184.39 | 4.20253  | YES | YES |
| 29 | a | 187.02 | 0.41870  | YES | YES |
| 30 | a | 189.00 | 0.52802  | YES | YES |
| 31 | a | 194.81 | 2.14942  | YES | YES |
| 32 | a | 204.30 | 1.22757  | YES | YES |
| 33 | a | 206.37 | 1.16462  | YES | YES |
| 34 | a | 207.36 | 1.05014  | YES | YES |
| 35 | a | 210.18 | 4.35576  | YES | YES |
| 36 | a | 212.82 | 1.18363  | YES | YES |
| 37 | a | 238.49 | 6.05680  | YES | YES |
| 38 | a | 240.33 | 15.57181 | YES | YES |
| 39 | a | 241.21 | 26.31193 | YES | YES |
| 40 | a | 246.09 | 27.24991 | YES | YES |
| 41 | a | 252.25 | 0.69992  | YES | YES |
| 42 | a | 256.80 | 4.88732  | YES | YES |
| 43 | a | 256.85 | 1.09396  | YES | YES |
| 44 | a | 262.69 | 0.17470  | YES | YES |
| 45 | a | 265.74 | 1.77103  | YES | YES |
| 46 | a | 273.49 | 0.27264  | YES | YES |
| 47 | a | 282.23 | 0.02725  | YES | YES |
| 48 | a | 284.42 | 0.30934  | YES | YES |
| 49 | a | 291.68 | 0.73973  | YES | YES |
| 50 | a | 302.09 | 11.79111 | YES | YES |



**[PhS(PtBu3)]+**

bp86-d3\_def2-tzvpp energy (au): -1444.9992513780

Zero point energy (au): 0.4496041

Entropy (kJ mol<sup>-1</sup>): 0.69066

Chemical potential (kJ mol<sup>-1</sup>): 1043.99

XYZ coordinates:

52

|   |          |          |          |
|---|----------|----------|----------|
| P | -0.97754 | -0.01123 | 0.01835  |
| C | 2.20282  | -0.66012 | 0.09773  |
| C | 4.28725  | -0.02726 | 1.15075  |
| H | 4.88391  | 0.10765  | 2.05222  |
| C | 4.83357  | 0.25193  | -0.10490 |
| H | 5.85868  | 0.61157  | -0.18534 |
| C | 4.07126  | 0.05109  | -1.25884 |
| H | 4.50201  | 0.24329  | -2.24094 |
| C | 2.75972  | -0.41836 | -1.16412 |
| H | 2.18801  | -0.60992 | -2.06900 |
| C | -0.82107 | 1.45030  | 1.24756  |
| C | -1.85123 | 2.55284  | 0.92878  |
| H | -1.77646 | 3.31152  | 1.72170  |
| C | 0.59794  | 2.05670  | 1.20734  |
| H | 0.60081  | 2.90974  | 1.90130  |
| H | 0.89839  | 2.43331  | 0.22841  |
| H | 1.35677  | 1.35087  | 1.55260  |
| C | -1.03120 | 0.58287  | -1.80737 |
| C | -2.43099 | 1.11943  | -2.17390 |
| H | -2.37574 | 1.50827  | -3.20089 |
| H | -2.76120 | 1.94298  | -1.53271 |
| H | -3.19917 | 0.33890  | -2.16834 |
| H | -1.42753 | -1.36697 | -2.78465 |
| H | 0.28750  | -1.04169 | -2.51781 |
| H | -0.60300 | -0.15998 | -3.77349 |
| C | 0.00257  | 1.70829  | -2.01774 |
| H | 1.01597  | 1.41602  | -1.72184 |
| H | -0.26754 | 2.63280  | -1.49806 |
| H | 0.02645  | 1.93801  | -3.09219 |
| C | -2.46920 | -1.16179 | 0.43911  |
| C | -2.73471 | -2.13073 | -0.73185 |
| H | -3.50881 | -2.83754 | -0.40204 |
| H | -1.84796 | -2.71812 | -0.99956 |
| H | -3.11960 | -1.62884 | -1.62499 |
| C | -3.73562 | -0.32096 | 0.69989  |
| H | -3.99658 | 0.34277  | -0.13040 |
| H | -3.66647 | 0.27112  | 1.61864  |
| H | -4.57312 | -1.02076 | 0.83246  |
| C | -2.17816 | -2.03118 | 1.68458  |
| H | -1.93748 | -1.45704 | 2.58120  |
| H | -1.37761 | -2.75796 | 1.51042  |
| H | -3.09440 | -2.60131 | 1.89520  |
| S | 0.58461  | -1.40903 | 0.30662  |
| C | 2.97284  | -0.48323 | 1.25758  |
| H | 2.54476  | -0.70734 | 2.23419  |

|   |          |          |          |
|---|----------|----------|----------|
| H | -1.64228 | 3.06086  | -0.01867 |
| H | -2.88527 | 2.19569  | 0.91709  |
| C | -1.04268 | 0.92870  | 2.68047  |
| H | -0.82009 | 1.75421  | 3.37138  |
| H | -2.07490 | 0.61838  | 2.87184  |
| H | -0.36457 | 0.10175  | 2.92491  |
| C | -0.67338 | -0.57717 | -2.75929 |

Vibrational Spectrum (first 50 lines):

| #  | mode | symmetry             | wave number | IR intensity | selection rules |
|----|------|----------------------|-------------|--------------|-----------------|
| #  |      | cm <sup>**(-1)</sup> | km/mol      | IR           | RAMAN           |
| 1  |      | 0.00                 | 0.00000     | -            | -               |
| 2  |      | 0.00                 | 0.00000     | -            | -               |
| 3  |      | 0.00                 | 0.00000     | -            | -               |
| 4  |      | 0.00                 | 0.00000     | -            | -               |
| 5  |      | 0.00                 | 0.00000     | -            | -               |
| 6  |      | 0.00                 | 0.00000     | -            | -               |
| 7  | a    | 21.53                | 0.09735     | YES          | YES             |
| 8  | a    | 54.85                | 0.01945     | YES          | YES             |
| 9  | a    | 58.84                | 0.14637     | YES          | YES             |
| 10 | a    | 75.13                | 0.30232     | YES          | YES             |
| 11 | a    | 89.51                | 0.19200     | YES          | YES             |
| 12 | a    | 120.10               | 0.36760     | YES          | YES             |
| 13 | a    | 126.63               | 0.15274     | YES          | YES             |
| 14 | a    | 129.13               | 0.61882     | YES          | YES             |
| 15 | a    | 154.35               | 0.12521     | YES          | YES             |
| 16 | a    | 167.11               | 0.04330     | YES          | YES             |
| 17 | a    | 174.01               | 0.17680     | YES          | YES             |
| 18 | a    | 187.39               | 0.39347     | YES          | YES             |
| 19 | a    | 204.79               | 0.76791     | YES          | YES             |
| 20 | a    | 209.55               | 0.48077     | YES          | YES             |
| 21 | a    | 210.13               | 1.60838     | YES          | YES             |
| 22 | a    | 226.18               | 0.66412     | YES          | YES             |
| 23 | a    | 237.10               | 0.98945     | YES          | YES             |
| 24 | a    | 248.80               | 0.40998     | YES          | YES             |
| 25 | a    | 251.71               | 0.15404     | YES          | YES             |
| 26 | a    | 258.38               | 0.04659     | YES          | YES             |
| 27 | a    | 270.02               | 0.36436     | YES          | YES             |
| 28 | a    | 276.58               | 0.24098     | YES          | YES             |
| 29 | a    | 280.90               | 0.28662     | YES          | YES             |
| 30 | a    | 285.47               | 0.34630     | YES          | YES             |
| 31 | a    | 302.63               | 0.06701     | YES          | YES             |
| 32 | a    | 316.89               | 0.16190     | YES          | YES             |
| 33 | a    | 326.90               | 0.29350     | YES          | YES             |
| 34 | a    | 331.82               | 0.18217     | YES          | YES             |
| 35 | a    | 340.21               | 0.41493     | YES          | YES             |
| 36 | a    | 362.97               | 0.97815     | YES          | YES             |
| 37 | a    | 372.21               | 0.50183     | YES          | YES             |
| 38 | a    | 379.58               | 0.47184     | YES          | YES             |
| 39 | a    | 394.03               | 0.79159     | YES          | YES             |
| 40 | a    | 399.06               | 1.58683     | YES          | YES             |
| 41 | a    | 404.03               | 0.97618     | YES          | YES             |
| 42 | a    | 408.08               | 0.52826     | YES          | YES             |
| 43 | a    | 417.18               | 3.85572     | YES          | YES             |
| 44 | a    | 453.21               | 11.33154    | YES          | YES             |
| 45 | a    | 456.87               | 9.10968     | YES          | YES             |

|    |   |        |          |     |     |
|----|---|--------|----------|-----|-----|
| 46 | a | 483.90 | 8.29296  | YES | YES |
| 47 | a | 507.61 | 7.50584  | YES | YES |
| 48 | a | 547.58 | 23.13008 | YES | YES |
| 49 | a | 572.89 | 7.07769  | YES | YES |
| 50 | a | 582.48 | 14.05892 | YES | YES |

## TS [PhS(PPh3)2]<sup>+</sup>

bp86-d3\_def2-tzvpp energy (au): -2703.1869807660

Zero point energy (au): 0.6243858

Entropy (kJ mol<sup>-1</sup>): 1.08627

Chemical potential (kJ mol<sup>-1</sup>): 1425.62

XYZ coordinates:

80

|   |          |          |          |
|---|----------|----------|----------|
| C | -4.74033 | 0.64697  | 3.28823  |
| H | -5.78765 | 0.79659  | 3.54975  |
| C | 2.81639  | 2.37872  | 3.36005  |
| H | 3.89778  | 2.37529  | 3.22552  |
| S | -0.38729 | 0.04069  | -0.38712 |
| P | -0.31247 | 0.06130  | 2.13890  |
| C | 0.81453  | 3.39525  | 4.26449  |
| H | 0.33227  | 4.18396  | 4.84160  |
| C | -4.15675 | 1.41470  | 2.27605  |
| H | -4.74665 | 2.16278  | 1.74696  |
| C | -2.04869 | 0.26110  | 2.62119  |
| C | 2.04981  | 1.36359  | 2.79151  |
| H | 2.53672  | 0.57651  | 2.21480  |
| C | 1.03916  | -4.09825 | 3.60946  |
| H | 1.35301  | -5.08946 | 3.93565  |
| C | 0.65227  | 1.35259  | 2.96717  |
| C | 3.44286  | 1.41153  | -0.56901 |
| H | 3.94324  | 2.36300  | -0.74637 |
| C | -2.81749 | 1.21961  | 1.93647  |
| H | -2.36360 | 1.81367  | 1.14219  |
| C | 0.23645  | -1.54810 | 2.77121  |
| C | 0.16189  | -3.96280 | 2.52786  |
| H | -0.21009 | -4.84706 | 2.01052  |
| C | 0.03854  | 2.37753  | 3.70601  |
| H | -1.04143 | 2.37590  | 3.85133  |
| C | 2.20123  | 3.39849  | 4.09390  |
| H | 2.80291  | 4.19346  | 4.53382  |
| C | -2.64002 | -0.50924 | 3.63559  |
| H | -2.05135 | -1.25789 | 4.16550  |
| C | 1.11105  | -1.68879 | 3.85935  |
| H | 1.47623  | -0.80745 | 4.38556  |
| C | -0.23342 | -2.69496 | 2.10500  |
| H | -0.90634 | -2.58779 | 1.25315  |
| C | 2.15141  | -1.02970 | -0.10878 |
| H | 1.64233  | -1.97710 | 0.05957  |
| C | -3.98252 | -0.31428 | 3.96389  |
| H | -4.43711 | -0.91235 | 4.75333  |
| C | 1.51071  | -2.96226 | 4.27177  |
| H | 2.18859  | -3.06538 | 5.11886  |
| C | 3.54486  | -0.95736 | -0.07336 |
| H | 4.12508  | -1.85726 | 0.12821  |
| C | 2.04779  | 1.35254  | -0.58512 |
| H | 1.45947  | 2.24953  | -0.76920 |
| C | 4.19159  | 0.25984  | -0.30920 |
| H | 5.27987  | 0.31113  | -0.28836 |

|   |          |          |          |
|---|----------|----------|----------|
| C | 1.40229  | 0.12874  | -0.36061 |
| C | -4.76234 | -1.06311 | -3.69014 |
| H | -5.80000 | -1.31099 | -3.91219 |
| C | 2.95728  | -2.05854 | -3.88417 |
| H | 4.03420  | -1.89823 | -3.84336 |
| P | -0.38300 | -0.02981 | -2.71796 |
| C | 1.05935  | -3.44200 | -4.47378 |
| H | 0.65436  | -4.35954 | -4.89969 |
| C | -4.08873 | -1.73524 | -2.66597 |
| H | -4.59872 | -2.50595 | -2.08884 |
| C | -2.10109 | -0.42240 | -3.11994 |
| C | 2.09822  | -1.07910 | -3.39096 |
| H | 2.50821  | -0.16393 | -2.96335 |
| C | 0.54136  | 4.12552  | -4.47943 |
| H | 0.75219  | 5.11562  | -4.88279 |
| C | 0.70451  | -1.27561 | -3.44609 |
| C | -2.76199 | -1.41670 | -2.37558 |
| H | -2.23819 | -1.93805 | -1.57415 |
| C | 0.00933  | 1.58307  | -3.44032 |
| C | -0.21862 | 3.99397  | -3.31206 |
| H | -0.60159 | 4.87962  | -2.80559 |
| C | 0.18875  | -2.46451 | -3.98882 |
| H | -0.88817 | -2.62170 | -4.04213 |
| C | 2.44120  | -3.24196 | -4.42257 |
| H | 3.11687  | -4.00651 | -4.80508 |
| C | -2.78130 | 0.25242  | -4.14661 |
| H | -2.27430 | 1.02783  | -4.72026 |
| C | 0.76419  | 1.71712  | -4.61646 |
| H | 1.14084  | 0.83380  | -5.13081 |
| C | -0.48200 | 2.72897  | -2.78958 |
| H | -1.06221 | 2.62448  | -1.87211 |
| C | -4.10903 | -0.07138 | -4.42786 |
| H | -4.63441 | 0.45225  | -5.22589 |
| C | 1.02951  | 2.98885  | -5.12888 |
| H | 1.61655  | 3.08986  | -6.04135 |

Vibrational Spectrum (first 50 lines):

| #  | mode | symmetry | wave number | IR intensity | selection rules |
|----|------|----------|-------------|--------------|-----------------|
| #  |      | cm**(-1) | km/mol      | IR           | RAMAN           |
| 1  | a    | -34.26   | 0.00000     | YES          | YES             |
| 2  |      | 0.00     | 0.00000     | -            | -               |
| 3  |      | 0.00     | 0.00000     | -            | -               |
| 4  |      | 0.00     | 0.00000     | -            | -               |
| 5  |      | 0.00     | 0.00000     | -            | -               |
| 6  |      | 0.00     | 0.00000     | -            | -               |
| 7  |      | 0.00     | 0.00000     | -            | -               |
| 8  | a    | 5.02     | 0.00117     | YES          | YES             |
| 9  | a    | 11.44    | 1.94227     | YES          | YES             |
| 10 | a    | 19.96    | 3.06978     | YES          | YES             |
| 11 | a    | 21.84    | 3.48264     | YES          | YES             |
| 12 | a    | 24.22    | 1.83295     | YES          | YES             |
| 13 | a    | 28.46    | 0.40988     | YES          | YES             |
| 14 | a    | 37.62    | 5.26687     | YES          | YES             |
| 15 | a    | 40.03    | 2.84156     | YES          | YES             |
| 16 | a    | 43.15    | 0.05027     | YES          | YES             |
| 17 | a    | 45.42    | 3.12490     | YES          | YES             |

|    |   |        |          |     |     |
|----|---|--------|----------|-----|-----|
| 18 | a | 48.29  | 1.95090  | YES | YES |
| 19 | a | 53.10  | 21.60261 | YES | YES |
| 20 | a | 53.20  | 0.44155  | YES | YES |
| 21 | a | 56.72  | 0.23670  | YES | YES |
| 22 | a | 58.80  | 0.18238  | YES | YES |
| 23 | a | 71.87  | 2.93063  | YES | YES |
| 24 | a | 72.20  | 9.01989  | YES | YES |
| 25 | a | 76.51  | 3.42430  | YES | YES |
| 26 | a | 86.95  | 15.05784 | YES | YES |
| 27 | a | 90.84  | 0.00597  | YES | YES |
| 28 | a | 121.97 | 0.93956  | YES | YES |
| 29 | a | 130.88 | 18.65695 | YES | YES |
| 30 | a | 145.04 | 0.72793  | YES | YES |
| 31 | a | 180.95 | 2.49918  | YES | YES |
| 32 | a | 183.82 | 1.38591  | YES | YES |
| 33 | a | 191.85 | 0.87297  | YES | YES |
| 34 | a | 195.84 | 2.89697  | YES | YES |
| 35 | a | 202.69 | 1.71442  | YES | YES |
| 36 | a | 208.70 | 2.60371  | YES | YES |
| 37 | a | 232.45 | 47.12021 | YES | YES |
| 38 | a | 237.50 | 0.28224  | YES | YES |
| 39 | a | 238.14 | 0.19343  | YES | YES |
| 40 | a | 252.39 | 0.20879  | YES | YES |
| 41 | a | 253.76 | 4.81938  | YES | YES |
| 42 | a | 262.67 | 0.67672  | YES | YES |
| 43 | a | 264.20 | 0.47511  | YES | YES |
| 44 | a | 301.62 | 8.33489  | YES | YES |
| 45 | a | 384.84 | 1.08401  | YES | YES |
| 46 | a | 386.91 | 0.19537  | YES | YES |
| 47 | a | 388.56 | 0.41034  | YES | YES |
| 48 | a | 390.22 | 0.81809  | YES | YES |
| 49 | a | 390.38 | 0.21550  | YES | YES |
| 50 | a | 393.39 | 4.04042  | YES | YES |

## TS [PhS(PPh3)(PtBu3)]+

bp86-d3\_def2-tzvpp energy (au): -2481.6904001350

Zero point energy (au): 0.7168680

Entropy (kJ mol<sup>-1</sup>): 1.05530

Chemical potential (kJ mol<sup>-1</sup>): 1682.58

XYZ coordinates:

86

|   |          |          |          |
|---|----------|----------|----------|
| P | -2.09674 | 0.17592  | 0.02075  |
| S | 0.24253  | 0.02625  | -0.01367 |
| C | 0.16343  | -1.76054 | -0.04991 |
| C | -0.13388 | -2.41867 | -1.25206 |
| H | -0.28448 | -1.83999 | -2.16194 |
| C | -0.23802 | -3.81070 | -1.27274 |
| H | -0.47376 | -4.31979 | -2.20682 |
| C | -0.02820 | -4.54803 | -0.10294 |
| H | -0.09888 | -5.63506 | -0.12444 |
| C | 0.26986  | -3.89034 | 1.09365  |
| H | 0.42485  | -4.46134 | 2.00866  |
| C | 0.35396  | -2.49674 | 1.12619  |
| H | 0.55475  | -1.97700 | 2.06133  |
| C | -2.97948 | -0.77674 | 1.27716  |
| C | -2.97414 | -2.18202 | 1.17801  |
| H | -2.48449 | -2.67205 | 0.33599  |
| C | -3.60119 | -2.94939 | 2.15730  |
| H | -3.59873 | -4.03567 | 2.07241  |
| C | -4.22554 | -2.32953 | 3.24485  |
| H | -4.71197 | -2.93317 | 4.01061  |
| C | -4.22867 | -0.93612 | 3.34797  |
| H | -4.72180 | -0.45063 | 4.18967  |
| C | -3.60963 | -0.15694 | 2.36903  |
| H | -3.62661 | 0.92949  | 2.44886  |
| C | -2.27916 | 1.94383  | 0.35935  |
| C | -3.04693 | 2.78271  | -0.46293 |
| H | -3.59370 | 2.36730  | -1.30903 |
| C | -3.10507 | 4.15206  | -0.19704 |
| H | -3.70261 | 4.80018  | -0.83747 |
| C | -2.40222 | 4.68993  | 0.88448  |
| H | -2.44967 | 5.75968  | 1.08644  |
| C | -1.63876 | 3.85701  | 1.70847  |
| H | -1.09269 | 4.27375  | 2.55441  |
| C | -1.57114 | 2.48886  | 1.44747  |
| H | -0.97358 | 1.84031  | 2.08918  |
| C | -2.83229 | -0.17285 | -1.59558 |
| C | -4.06474 | -0.83111 | -1.73158 |
| H | -4.61836 | -1.14576 | -0.84760 |
| C | -4.58215 | -1.07937 | -3.00471 |
| H | -5.53946 | -1.58988 | -3.10631 |
| C | -3.88081 | -0.67076 | -4.14188 |
| H | -4.28913 | -0.86659 | -5.13294 |
| C | -2.65457 | -0.00993 | -4.00936 |
| H | -2.10715 | 0.31073  | -4.89540 |
| C | -2.12696 | 0.23480  | -2.74271 |

|   |          |          |          |
|---|----------|----------|----------|
| H | -1.16544 | 0.73876  | -2.63750 |
| P | 2.77779  | 0.21091  | -0.02648 |
| C | 3.06508  | 1.42631  | -1.49351 |
| C | 4.35557  | 2.25834  | -1.37455 |
| H | 4.47260  | 2.85557  | -2.29219 |
| C | 1.86559  | 2.39487  | -1.63235 |
| H | 2.07385  | 3.06373  | -2.48048 |
| H | 1.69703  | 3.02656  | -0.75693 |
| H | 0.93462  | 1.86021  | -1.85262 |
| C | 3.08573  | 1.12069  | 1.63995  |
| C | 4.57345  | 1.31798  | 1.98582  |
| H | 4.64122  | 1.89162  | 2.92276  |
| H | 5.11385  | 1.88067  | 1.21724  |
| H | 5.09769  | 0.37059  | 2.15093  |
| H | 2.80152  | -0.68375 | 2.90549  |
| H | 1.31507  | 0.24064  | 2.59438  |
| H | 2.54236  | 0.86478  | 3.71458  |
| C | 2.40212  | 2.50387  | 1.61091  |
| H | 1.33976  | 2.44057  | 1.34288  |
| H | 2.89671  | 3.20872  | 0.93496  |
| H | 2.46034  | 2.93187  | 2.62315  |
| C | 3.97648  | -1.29903 | -0.18006 |
| C | 4.01396  | -2.07022 | 1.15449  |
| H | 4.58839  | -2.99484 | 0.99231  |
| H | 3.01156  | -2.36615 | 1.48600  |
| H | 4.51224  | -1.52015 | 1.95899  |
| C | 5.41490  | -0.91101 | -0.56937 |
| H | 5.86953  | -0.20154 | 0.13029  |
| H | 5.47784  | -0.49166 | -1.57911 |
| H | 6.03182  | -1.82276 | -0.56087 |
| C | 3.41115  | -2.28652 | -1.22495 |
| H | 3.30122  | -1.86017 | -2.22491 |
| H | 2.44304  | -2.69167 | -0.91451 |
| H | 4.11285  | -3.13012 | -1.30612 |
| H | 4.31752  | 2.96361  | -0.53650 |
| H | 5.25422  | 1.64395  | -1.26627 |
| C | 3.09989  | 0.61076  | -2.80155 |
| H | 3.10155  | 1.31470  | -3.64718 |
| H | 3.99665  | -0.00971 | -2.89734 |
| H | 2.21220  | -0.02846 | -2.90590 |
| C | 2.39520  | 0.32163  | 2.76887  |

Vibrational Spectrum (first 50 lines):

| #  | mode | symmetry | wave number<br>cm**(-1) | IR intensity<br>km/mol | IR  | RAMAN | selection rules |
|----|------|----------|-------------------------|------------------------|-----|-------|-----------------|
| 1  |      | a        | -26.71                  | 0.00000                | YES | YES   |                 |
| 2  |      |          | 0.00                    | 0.00000                | -   | -     |                 |
| 3  |      |          | 0.00                    | 0.00000                | -   | -     |                 |
| 4  |      |          | 0.00                    | 0.00000                | -   | -     |                 |
| 5  |      |          | 0.00                    | 0.00000                | -   | -     |                 |
| 6  |      |          | 0.00                    | 0.00000                | -   | -     |                 |
| 7  |      |          | 0.00                    | 0.00000                | -   | -     |                 |
| 8  |      | a        | 9.32                    | 4.00591                | YES | YES   |                 |
| 9  |      | a        | 14.52                   | 4.04686                | YES | YES   |                 |
| 10 |      | a        | 20.44                   | 5.81923                | YES | YES   |                 |
| 11 |      | a        | 28.11                   | 18.03090               | YES | YES   |                 |



|    |   |        |          |     |     |
|----|---|--------|----------|-----|-----|
| 12 | a | 41.37  | 0.86026  | YES | YES |
| 13 | a | 46.21  | 0.52806  | YES | YES |
| 14 | a | 50.28  | 0.16625  | YES | YES |
| 15 | a | 54.34  | 0.01777  | YES | YES |
| 16 | a | 60.57  | 2.04106  | YES | YES |
| 17 | a | 62.77  | 0.01600  | YES | YES |
| 18 | a | 71.29  | 4.06592  | YES | YES |
| 19 | a | 78.62  | 0.05053  | YES | YES |
| 20 | a | 83.23  | 0.09134  | YES | YES |
| 21 | a | 89.96  | 1.21132  | YES | YES |
| 22 | a | 94.95  | 1.53383  | YES | YES |
| 23 | a | 109.67 | 8.19360  | YES | YES |
| 24 | a | 120.23 | 15.68526 | YES | YES |
| 25 | a | 123.65 | 13.89729 | YES | YES |
| 26 | a | 131.80 | 1.06922  | YES | YES |
| 27 | a | 154.67 | 0.92193  | YES | YES |
| 28 | a | 177.32 | 0.02696  | YES | YES |
| 29 | a | 185.62 | 1.74058  | YES | YES |
| 30 | a | 189.46 | 0.05031  | YES | YES |
| 31 | a | 194.50 | 0.55624  | YES | YES |
| 32 | a | 196.31 | 0.09479  | YES | YES |
| 33 | a | 203.67 | 2.70187  | YES | YES |
| 34 | a | 205.40 | 2.73256  | YES | YES |
| 35 | a | 208.23 | 1.31960  | YES | YES |
| 36 | a | 210.75 | 0.40456  | YES | YES |
| 37 | a | 229.08 | 7.25543  | YES | YES |
| 38 | a | 236.27 | 27.83322 | YES | YES |
| 39 | a | 237.50 | 8.62022  | YES | YES |
| 40 | a | 244.33 | 1.78255  | YES | YES |
| 41 | a | 252.22 | 0.55867  | YES | YES |
| 42 | a | 257.71 | 1.96360  | YES | YES |
| 43 | a | 259.40 | 0.10342  | YES | YES |
| 44 | a | 261.95 | 0.51512  | YES | YES |
| 45 | a | 263.85 | 0.42112  | YES | YES |
| 46 | a | 270.40 | 0.23664  | YES | YES |
| 47 | a | 283.13 | 0.78780  | YES | YES |
| 48 | a | 285.36 | 0.62073  | YES | YES |
| 49 | a | 297.65 | 2.37273  | YES | YES |
| 50 | a | 300.13 | 4.23570  | YES | YES |

## TS [PhSe(PPh3)2]<sup>+</sup>

bp86-d3\_def2-tzvpp energy (au): -4706.7874395860

Zero point energy (au): 0.6237693

Entropy (kJ mol<sup>-1</sup>): 1.11698

Chemical potential (kJ mol<sup>-1</sup>): 1417.98

XYZ coordinates:

80

|    |          |          |          |
|----|----------|----------|----------|
| C  | -4.71792 | 0.65681  | 3.87488  |
| H  | -5.75261 | 0.81636  | 4.17731  |
| C  | 2.87063  | 2.29910  | 3.58815  |
| H  | 3.94863  | 2.25665  | 3.43521  |
| Se | -0.46658 | 0.00183  | -0.00065 |
| P  | -0.34892 | 0.01324  | 2.55426  |
| C  | 0.91637  | 3.41755  | 4.47649  |
| H  | 0.46824  | 4.24666  | 5.02356  |
| C  | -4.15561 | 1.44616  | 2.86715  |
| H  | -4.74893 | 2.22133  | 2.38296  |
| C  | -2.06052 | 0.24458  | 3.10156  |
| C  | 2.06555  | 1.27834  | 3.08669  |
| H  | 2.52007  | 0.44664  | 2.54820  |
| C  | 1.04723  | -4.08537 | 4.14303  |
| H  | 1.36985  | -5.06126 | 4.50503  |
| C  | 0.67176  | 1.32023  | 3.28489  |
| C  | 3.56123  | 1.18676  | -0.28223 |
| H  | 4.10081  | 2.10814  | -0.49959 |
| C  | -2.83341 | 1.23855  | 2.47384  |
| H  | -2.39701 | 1.85100  | 1.68350  |
| C  | 0.22632  | -1.57709 | 3.21034  |
| C  | 0.20834  | -3.99606 | 3.02709  |
| H  | -0.12516 | -4.90065 | 2.51902  |
| C  | 0.10105  | 2.39741  | 3.98249  |
| H  | -0.97504 | 2.43486  | 4.14895  |
| C  | 2.29880  | 3.37172  | 4.28020  |
| H  | 2.93146  | 4.16898  | 4.66957  |
| C  | -2.62936 | -0.54727 | 4.11187  |
| H  | -2.03782 | -1.32354 | 4.59667  |
| C  | 1.06187  | -1.67035 | 4.33411  |
| H  | 1.39043  | -0.76829 | 4.84910  |
| C  | -0.19734 | -2.74787 | 2.55708  |
| H  | -0.83907 | -2.67623 | 1.67791  |
| C  | 2.16835  | -1.17890 | 0.27299  |
| H  | 1.62397  | -2.09919 | 0.47660  |
| C  | -3.95579 | -0.33865 | 4.49293  |
| H  | -4.39431 | -0.95474 | 5.27756  |
| C  | 1.47133  | -2.92402 | 4.79360  |
| H  | 2.12055  | -2.99175 | 5.66628  |
| C  | 3.56532  | -1.16890 | 0.28267  |
| H  | 4.10810  | -2.08837 | 0.50014  |
| C  | 2.16423  | 1.19185  | -0.27277 |
| H  | 1.61668  | 2.11023  | -0.47646 |
| C  | 4.26159  | 0.01014  | 0.00022  |
| H  | 5.35128  | 0.01203  | 0.00021  |

|   |          |          |          |
|---|----------|----------|----------|
| C | 1.47322  | 0.00523  | -0.00005 |
| C | -4.70893 | -0.67348 | -3.88551 |
| H | -5.74241 | -0.83694 | -4.19000 |
| C | 2.88521  | -2.28823 | -3.57738 |
| H | 3.96314  | -2.23903 | -3.42592 |
| P | -0.34534 | -0.01249 | -2.55576 |
| C | 0.93584  | -3.42371 | -4.45477 |
| H | 0.49146  | -4.25935 | -4.99492 |
| C | -4.14769 | -1.45624 | -2.87207 |
| H | -4.74067 | -2.23017 | -2.38547 |
| C | -2.05475 | -0.25095 | -3.10668 |
| C | 2.07536  | -1.26780 | -3.08294 |
| H | 2.52613  | -0.42981 | -2.55106 |
| C | 1.04302  | 4.08624  | -4.15096 |
| H | 1.36402  | 5.06217  | -4.51427 |
| C | 0.68160  | -1.31841 | -3.27931 |
| C | -2.82705 | -1.24362 | -2.47618 |
| H | -2.39147 | -1.85110 | -1.68160 |
| C | 0.22662  | 1.57784  | -3.21460 |
| C | 0.20415  | 3.99705  | -3.03500 |
| H | -0.13091 | 4.90177  | -2.52821 |
| C | 0.11578  | -2.40400 | -3.96782 |
| H | -0.96028 | -2.44844 | -4.13276 |
| C | 2.31825  | -3.36916 | -4.26046 |
| H | 2.95464  | -4.16607 | -4.64440 |
| C | -2.62257 | 0.53439  | -4.12264 |
| H | -2.03155 | 1.30973  | -4.60959 |
| C | 1.06188  | 1.67099  | -4.33862 |
| H | 1.39221  | 0.76878  | -4.85225 |
| C | -0.19938 | 2.74882  | -2.56326 |
| H | -0.84111 | 2.67733  | -1.68407 |
| C | -3.94732 | 0.32053  | -4.50658 |
| H | -4.38502 | 0.93143  | -5.29571 |
| C | 1.46911  | 2.92472  | -4.79993 |
| H | 2.11815  | 2.99238  | -5.67274 |

Vibrational Spectrum (first 50 lines):

| #  | mode | symmetry | wave number | IR intensity | selection rules |
|----|------|----------|-------------|--------------|-----------------|
| #  |      | cm**(-1) | km/mol      | IR           | RAMAN           |
| 1  |      | 0.00     | 0.00000     | -            | -               |
| 2  |      | 0.00     | 0.00000     | -            | -               |
| 3  |      | 0.00     | 0.00000     | -            | -               |
| 4  |      | 0.00     | 0.00000     | -            | -               |
| 5  |      | 0.00     | 0.00000     | -            | -               |
| 6  |      | 0.00     | 0.00000     | -            | -               |
| 7  | a    | 6.80     | 0.00140     | YES          | YES             |
| 8  | a    | 8.38     | 0.14397     | YES          | YES             |
| 9  | a    | 18.37    | 0.00489     | YES          | YES             |
| 10 | a    | 22.86    | 0.17980     | YES          | YES             |
| 11 | a    | 24.12    | 0.00580     | YES          | YES             |
| 12 | a    | 26.35    | 0.03386     | YES          | YES             |
| 13 | a    | 36.21    | 0.05980     | YES          | YES             |
| 14 | a    | 38.57    | 0.04642     | YES          | YES             |
| 15 | a    | 40.49    | 2.69294     | YES          | YES             |
| 16 | a    | 44.12    | 0.04001     | YES          | YES             |
| 17 | a    | 45.47    | 5.94857     | YES          | YES             |

|    |   |        |          |     |     |
|----|---|--------|----------|-----|-----|
| 18 | a | 49.35  | 1.07067  | YES | YES |
| 19 | a | 52.27  | 0.13267  | YES | YES |
| 20 | a | 56.68  | 0.03063  | YES | YES |
| 21 | a | 58.94  | 0.06732  | YES | YES |
| 22 | a | 59.86  | 21.01239 | YES | YES |
| 23 | a | 73.99  | 0.71143  | YES | YES |
| 24 | a | 74.42  | 0.02286  | YES | YES |
| 25 | a | 80.98  | 21.18293 | YES | YES |
| 26 | a | 88.41  | 0.02124  | YES | YES |
| 27 | a | 93.87  | 92.67092 | YES | YES |
| 28 | a | 104.18 | 0.08326  | YES | YES |
| 29 | a | 115.15 | 0.85976  | YES | YES |
| 30 | a | 124.58 | 0.00863  | YES | YES |
| 31 | a | 182.24 | 3.07461  | YES | YES |
| 32 | a | 183.28 | 0.41482  | YES | YES |
| 33 | a | 193.42 | 0.30174  | YES | YES |
| 34 | a | 195.16 | 4.33762  | YES | YES |
| 35 | a | 202.13 | 0.96938  | YES | YES |
| 36 | a | 203.98 | 2.91840  | YES | YES |
| 37 | a | 216.83 | 11.86863 | YES | YES |
| 38 | a | 236.31 | 8.13653  | YES | YES |
| 39 | a | 237.65 | 0.33825  | YES | YES |
| 40 | a | 238.23 | 0.11816  | YES | YES |
| 41 | a | 252.97 | 0.04650  | YES | YES |
| 42 | a | 253.66 | 1.75207  | YES | YES |
| 43 | a | 263.67 | 0.94740  | YES | YES |
| 44 | a | 264.52 | 0.19541  | YES | YES |
| 45 | a | 304.69 | 0.02299  | YES | YES |
| 46 | a | 388.07 | 0.00468  | YES | YES |
| 47 | a | 388.30 | 0.01998  | YES | YES |
| 48 | a | 388.94 | 0.34892  | YES | YES |
| 49 | a | 389.23 | 1.15322  | YES | YES |
| 50 | a | 390.33 | 0.26921  | YES | YES |

## TS [PhSe(PPh3)(PtBu3)]+

bp86-d3\_def2-tzvpp energy (au): -4485.2910933010

Zero point energy (au): 0.7161251

Entropy (kJ mol<sup>-1</sup>): 1.08308

Chemical potential (kJ mol<sup>-1</sup>): 1675.68

XYZ coordinates:

86

|    |          |          |          |
|----|----------|----------|----------|
| P  | -2.05415 | 0.37740  | 0.02778  |
| Se | 0.52828  | 0.22294  | 0.05258  |
| C  | 0.28132  | -1.70832 | 0.03135  |
| C  | -0.08680 | -2.33105 | -1.16914 |
| H  | -0.18903 | -1.74384 | -2.08056 |
| C  | -0.34850 | -3.70295 | -1.18687 |
| H  | -0.64094 | -4.18189 | -2.12095 |
| C  | -0.23475 | -4.45546 | -0.01396 |
| H  | -0.43285 | -5.52675 | -0.03190 |
| C  | 0.12203  | -3.82936 | 1.18263  |
| H  | 0.19324  | -4.40649 | 2.10420  |
| C  | 0.36810  | -2.45387 | 1.21138  |
| H  | 0.60592  | -1.96583 | 2.15279  |
| C  | -2.97782 | -0.54580 | 1.28301  |
| C  | -2.95318 | -1.95292 | 1.23054  |
| H  | -2.43441 | -2.46345 | 0.41896  |
| C  | -3.60292 | -2.69791 | 2.21270  |
| H  | -3.58563 | -3.78633 | 2.16083  |
| C  | -4.26976 | -2.05307 | 3.25966  |
| H  | -4.77457 | -2.63861 | 4.02761  |
| C  | -4.29143 | -0.65722 | 3.31777  |
| H  | -4.81662 | -0.15133 | 4.12758  |
| C  | -3.64943 | 0.09857  | 2.33478  |
| H  | -3.67928 | 1.18680  | 2.38099  |
| C  | -2.35061 | 2.14869  | 0.28193  |
| C  | -3.23020 | 2.88273  | -0.52918 |
| H  | -3.77635 | 2.38596  | -1.33074 |
| C  | -3.40264 | 4.25041  | -0.30867 |
| H  | -4.08710 | 4.81610  | -0.94035 |
| C  | -2.70518 | 4.89145  | 0.71905  |
| H  | -2.84459 | 5.95889  | 0.88825  |
| C  | -1.82814 | 4.16440  | 1.52982  |
| H  | -1.28475 | 4.66237  | 2.33257  |
| C  | -1.64362 | 2.79919  | 1.31016  |
| H  | -0.95583 | 2.23330  | 1.94035  |
| C  | -2.73141 | -0.05638 | -1.59921 |
| C  | -3.92923 | -0.77003 | -1.75767 |
| H  | -4.50307 | -1.07714 | -0.88410 |
| C  | -4.38787 | -1.08468 | -3.03901 |
| H  | -5.31910 | -1.63848 | -3.15621 |
| C  | -3.66277 | -0.68606 | -4.16466 |
| H  | -4.02522 | -0.93307 | -5.16219 |
| C  | -2.47160 | 0.03175  | -4.01105 |
| H  | -1.90575 | 0.34689  | -4.88753 |
| C  | -2.00265 | 0.34060  | -2.73517 |

|   |          |          |          |
|---|----------|----------|----------|
| H | -1.06666 | 0.88800  | -2.61381 |
| P | 3.11337  | 0.28672  | 0.02248  |
| C | 3.41695  | 1.92766  | -0.93630 |
| C | 4.81910  | 2.52003  | -0.69939 |
| H | 4.93434  | 3.40528  | -1.34329 |
| C | 2.35187  | 2.97884  | -0.54104 |
| H | 2.55900  | 3.89482  | -1.11418 |
| H | 2.36387  | 3.24927  | 0.51650  |
| H | 1.33616  | 2.65917  | -0.80733 |
| C | 3.70401  | 0.47338  | 1.84154  |
| C | 5.22890  | 0.34146  | 2.01183  |
| H | 5.47754  | 0.52840  | 3.06757  |
| H | 5.78731  | 1.06621  | 1.40996  |
| H | 5.59215  | -0.66321 | 1.76997  |
| H | 3.17344  | -1.61893 | 2.38233  |
| H | 1.90826  | -0.41448 | 2.71474  |
| H | 3.35452  | -0.49543 | 3.73654  |
| C | 3.25075  | 1.83697  | 2.40098  |
| H | 2.17036  | 1.99030  | 2.27878  |
| H | 3.78613  | 2.68386  | 1.96045  |
| H | 3.46284  | 1.84579  | 3.48036  |
| C | 4.01765  | -1.17450 | -0.84011 |
| C | 3.99246  | -2.40054 | 0.09555  |
| H | 4.40379  | -3.25628 | -0.45966 |
| H | 2.97179  | -2.66676 | 0.39834  |
| H | 4.61074  | -2.27096 | 0.98970  |
| C | 5.47453  | -0.85769 | -1.22660 |
| H | 6.09183  | -0.56180 | -0.37251 |
| H | 5.54191  | -0.07665 | -1.99194 |
| H | 5.92052  | -1.76789 | -1.65603 |
| C | 3.23684  | -1.57613 | -2.10986 |
| H | 3.25634  | -0.81694 | -2.89422 |
| H | 2.19486  | -1.82248 | -1.88498 |
| H | 3.70723  | -2.48182 | -2.52093 |
| H | 4.96432  | 2.85374  | 0.33363  |
| H | 5.62445  | 1.82324  | -0.95316 |
| C | 3.22624  | 1.67371  | -2.44496 |
| H | 3.23768  | 2.64667  | -2.95787 |
| H | 4.03014  | 1.07139  | -2.88016 |
| H | 2.26153  | 1.19612  | -2.66112 |
| C | 2.99076  | -0.59054 | 2.70266  |

Vibrational Spectrum (first 50 lines):

| #  | mode | symmetry | wave number | IR intensity | selection rules |
|----|------|----------|-------------|--------------|-----------------|
| #  |      |          | cm**(-1)    | km/mol       | IR RAMAN        |
| 1  |      |          | 0.00        | 0.00000      | - -             |
| 2  |      |          | 0.00        | 0.00000      | - -             |
| 3  |      |          | 0.00        | 0.00000      | - -             |
| 4  |      |          | 0.00        | 0.00000      | - -             |
| 5  |      |          | 0.00        | 0.00000      | - -             |
| 6  |      |          | 0.00        | 0.00000      | - -             |
| 7  | a    |          | 12.77       | 0.22862      | YES YES         |
| 8  | a    |          | 17.56       | 0.01628      | YES YES         |
| 9  | a    |          | 23.12       | 0.21246      | YES YES         |
| 10 | a    |          | 25.29       | 0.04940      | YES YES         |
| 11 | a    |          | 38.86       | 3.44993      | YES YES         |

|    |   |        |          |     |     |
|----|---|--------|----------|-----|-----|
| 12 | a | 43.32  | 0.99128  | YES | YES |
| 13 | a | 49.14  | 0.13523  | YES | YES |
| 14 | a | 51.79  | 1.14285  | YES | YES |
| 15 | a | 56.05  | 3.40172  | YES | YES |
| 16 | a | 58.41  | 15.16789 | YES | YES |
| 17 | a | 62.63  | 12.73542 | YES | YES |
| 18 | a | 74.60  | 38.03646 | YES | YES |
| 19 | a | 75.77  | 7.82661  | YES | YES |
| 20 | a | 82.28  | 7.71881  | YES | YES |
| 21 | a | 95.98  | 4.70397  | YES | YES |
| 22 | a | 96.85  | 6.08149  | YES | YES |
| 23 | a | 101.19 | 0.43045  | YES | YES |
| 24 | a | 109.12 | 15.13092 | YES | YES |
| 25 | a | 119.81 | 0.69045  | YES | YES |
| 26 | a | 127.13 | 0.39734  | YES | YES |
| 27 | a | 129.35 | 0.27312  | YES | YES |
| 28 | a | 168.23 | 0.08527  | YES | YES |
| 29 | a | 183.59 | 1.27666  | YES | YES |
| 30 | a | 190.86 | 0.33805  | YES | YES |
| 31 | a | 194.64 | 1.54493  | YES | YES |
| 32 | a | 197.15 | 1.45328  | YES | YES |
| 33 | a | 198.87 | 0.78720  | YES | YES |
| 34 | a | 203.58 | 0.65771  | YES | YES |
| 35 | a | 205.98 | 1.03552  | YES | YES |
| 36 | a | 213.51 | 0.31509  | YES | YES |
| 37 | a | 221.12 | 16.20360 | YES | YES |
| 38 | a | 230.09 | 0.19483  | YES | YES |
| 39 | a | 235.06 | 4.19109  | YES | YES |
| 40 | a | 237.64 | 0.60445  | YES | YES |
| 41 | a | 240.23 | 0.28904  | YES | YES |
| 42 | a | 251.57 | 0.17797  | YES | YES |
| 43 | a | 254.79 | 0.85947  | YES | YES |
| 44 | a | 255.10 | 0.74505  | YES | YES |
| 45 | a | 258.74 | 0.22333  | YES | YES |
| 46 | a | 263.50 | 0.64780  | YES | YES |
| 47 | a | 271.99 | 0.45760  | YES | YES |
| 48 | a | 276.88 | 0.06061  | YES | YES |
| 49 | a | 280.16 | 0.04109  | YES | YES |
| 50 | a | 288.83 | 1.27723  | YES | YES |

## References

1. P. Csaszar and P. Pulay, *Journal of Molecular Structure*, 1984, **114**, 31-34.
2. R. Ahlrichs, M. Bar, M. Haser, H. Horn and C. Kolmel, *Chemical Physics Letters*, 1989, **162**, 165-169.
3. K. Eichkorn, O. Treutler, H. Ohm, M. Haser and R. Ahlrichs, *Chemical Physics Letters*, 1995, **240**, 283-289.
4. O. Treutler and R. Ahlrichs, *Journal of Chemical Physics*, 1995, **102**, 346-354.
5. K. Eichkorn, F. Weigend, O. Treutler and R. Ahlrichs, *Theoretical Chemistry Accounts*, 1997, **97**, 119-124.
6. M. v. Arnim and R. Ahlrichs, *The Journal of Chemical Physics*, 1999, **111**, 9183-9190.
7. P. Deglmann and F. Furche, *Journal of Chemical Physics*, 2002, **117**, 9535-9538.
8. P. Deglmann, F. Furche and R. Ahlrichs, *Chemical Physics Letters*, 2002, **362**, 511-518.
9. P. Deglmann, K. May, F. Furche and R. Ahlrichs, *Chemical Physics Letters*, 2004, **384**, 103-107.
10. W. M. Haynes, *CRC Handbook of Chemistry and Physics ISBN 1439820775* 2010.
11. S. Grimme, J. Antony, S. Ehrlich and H. Krieg, *J. Chem. Phys.*, 2010, **132**, 154104-154104.
12. S. Grimme, S. Ehrlich and L. Goerigk, *J. Comput. Chem.*, 2011, **32**, 1456-1465.
13. Gaussian 09, Revision B.01, M. J. Frisch, G. W. Trucks, H. B. Schlegel, G. E. Scuseria, M. A. Robb, J. R. Cheeseman, G. Scalmani, V. Barone, B. Mennucci, G. A. Petersson, H. Nakatsuji, M. Caricato, X. Li, H. P. Hratchian, A. F. Izmaylov, J. Bloino, G. Zheng, J. L. Sonnenberg, M. Hada, M. Ehara, K. Toyota, R. Fukuda, J. Hasegawa, M. Ishida, T. Nakajima, Y. Honda, O. Kitao, H. Nakai, T. Vreven, J. A. J. Montgomery, J. E. Peralta, F. Ogliaro, M. Bearpark, J. J. Heyd, E. Brothers, K. N. Kudin, V. N. Staroverov, R. Kobayashi, J. Normand, K. Raghavachari, A. Rendell, J. C. Burant, S. S. Iyengar, J. Tomasi, M. Cossi, N. Rega, N. J. Millam, M. Klene, J. E. Knox, J. B. Cross, V. Bakken, C. Adamo, J. Jaramillo, R. Gomperts, R. E. Stratmann, O. Yazyev, A. J. Austin, R. Cammi, C. Pomelli, J. W. Ochterski, R. L. Martin, K. Morokuma, V. G. Zakrzewski, G. A. Voth, P. Salvador, J. J. Dannenberg, S. Dapprich, A. D. Daniels, Ö. Farkas, J. B. Foresman, J. V. Ortiz, J. Cioslowski and D. J. Fox, Gaussian, Inc., Wallingford CT, 2009
14. NBO 5, E. D. Glendening, J. K. Badenhoop, A. E. Reed, J. E. Carpenter, J. A. Bohmann, C. M. Morales and F. Weinhold, University of Wisconsin, Madison, 2001
